# Supplementary material for: Acid catalysed rearrangement of isobenzofurans to angularly fused phthalides
Source: Royal Society of Chemistry journal article supplement (doi:10.1039/c9ob00708c), 2019-01-01

# **Acid Catalysed Rearrangement of Isobenzofurans to Angularly Fused Phthalides**

## Crystallographic Data and Structure Refinements Summary for Compound **6f**

|                                                           |                                                                                    |
|-----------------------------------------------------------|------------------------------------------------------------------------------------|
| Molecular Structure (ORTEP Diagram)                       | 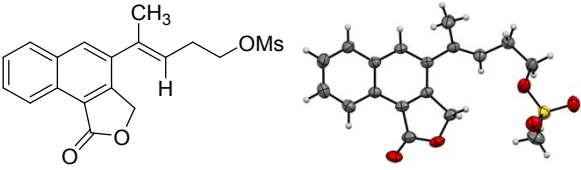 |
| CCDC number                                               | 1846904                                                                            |
| Formula                                                   | C <sub>18</sub> H <sub>18</sub> O <sub>5</sub> S                                   |
| Formula weight                                            | 346.38                                                                             |
| Colour                                                    | yellow                                                                             |
| Crystal morphology                                        | orthogonalized                                                                     |
| Temperature/K                                             | 296(2) K                                                                           |
| Radiation                                                 | Mo k/a                                                                             |
| Wavelength/Å                                              | 0.71073 Å                                                                          |
| Crystal system                                            | Triclinic                                                                          |
| Space group                                               | P-1                                                                                |
| a (Å)                                                     | 8.4865(4)                                                                          |
| b (Å)                                                     | 8.5936(4)                                                                          |
| c (Å)                                                     | 13.0039(6)                                                                         |
| α (°)                                                     | 71.285(2)                                                                          |
| β (°)                                                     | 82.909(2)                                                                          |
| γ (°)                                                     | 65.007(2)                                                                          |
| Volume(Å <sup>3</sup> )                                   | 814.03(7)                                                                          |
| Z                                                         | 2                                                                                  |
| Density (g/cm <sup>3</sup> )                              | 1.413                                                                              |
| μ (1/mm)                                                  | 0.224                                                                              |
| F (000)                                                   | 364                                                                                |
| θ (min, max)                                              | 0.0548 and 0.1158                                                                  |
| No. of unique reflns                                      | 3523                                                                               |
| No. of parameters                                         | 220                                                                                |
| R <sub>obs</sub> , wR <sub>2_obs</sub>                    | R1 = 0.0586, wR2 = 0.1266                                                          |
| Δρ <sub>min</sub> , Δρ <sub>max</sub> (eÅ <sup>-3</sup> ) | 0.287 and -0.392                                                                   |
| Goof                                                      | 1.033                                                                              |

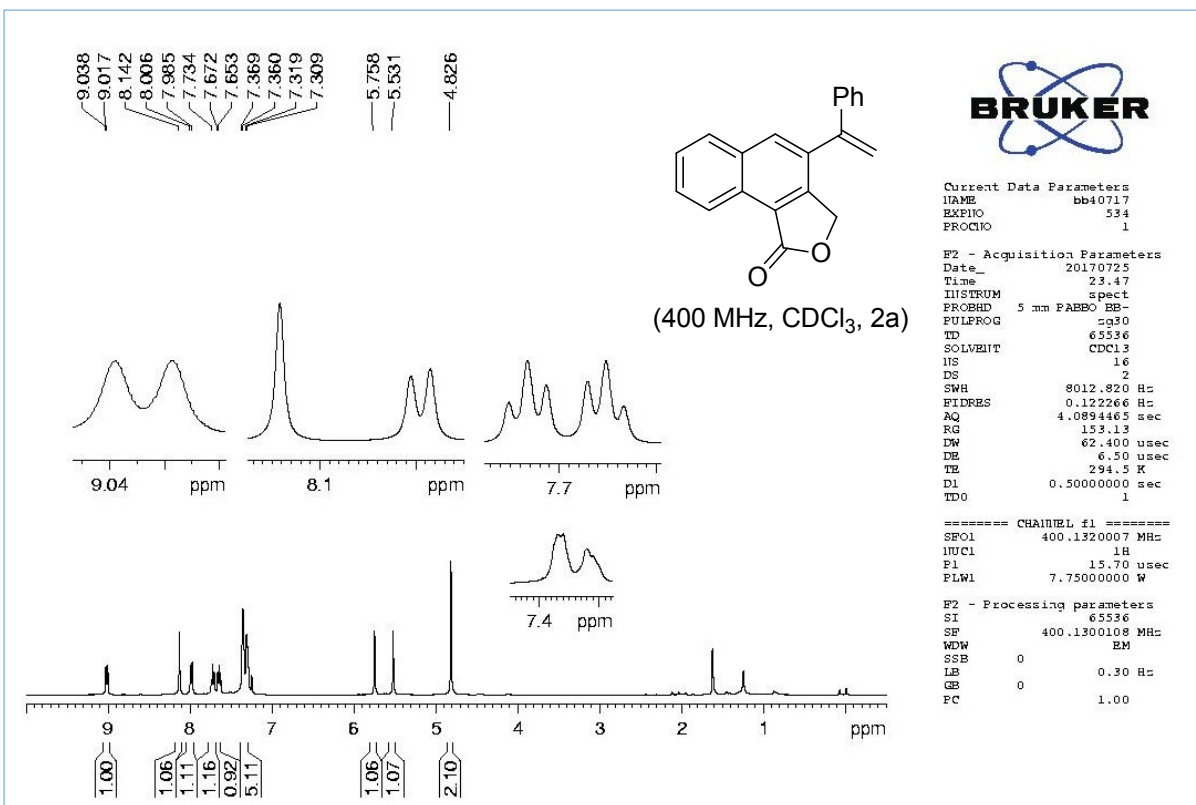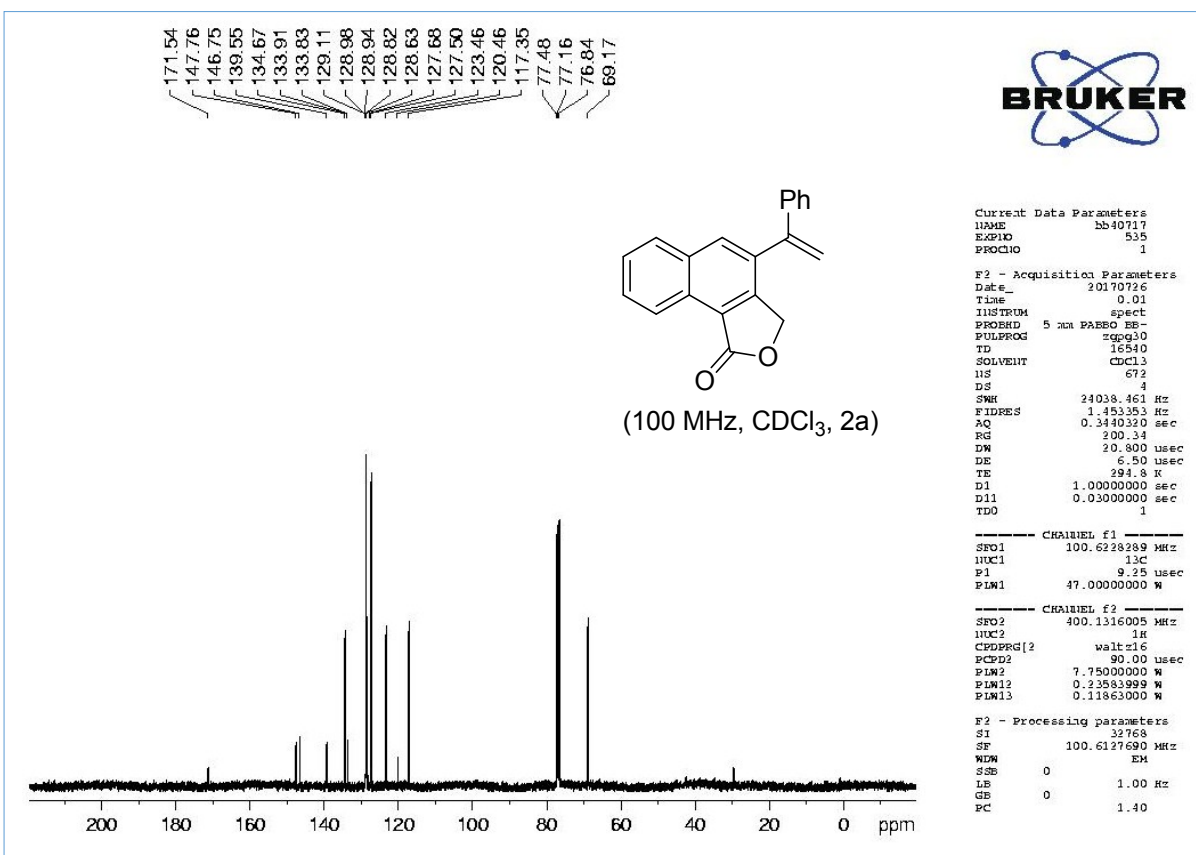

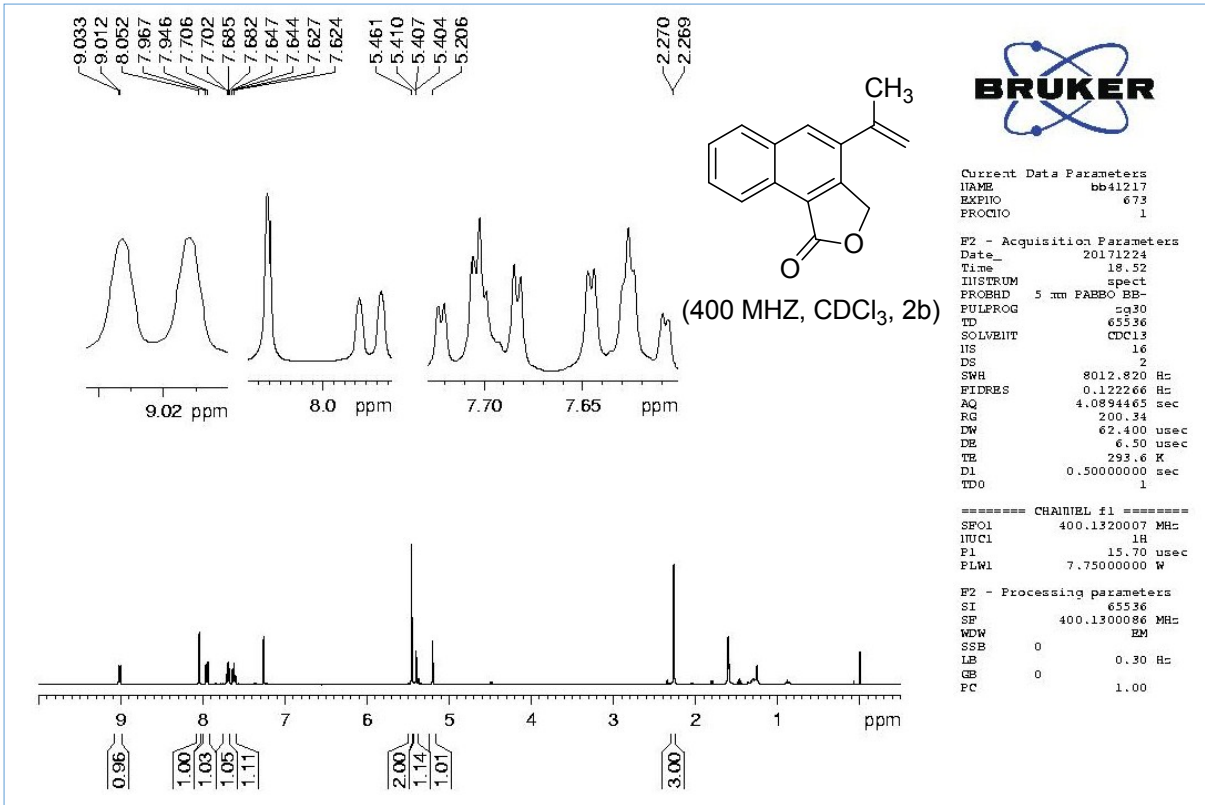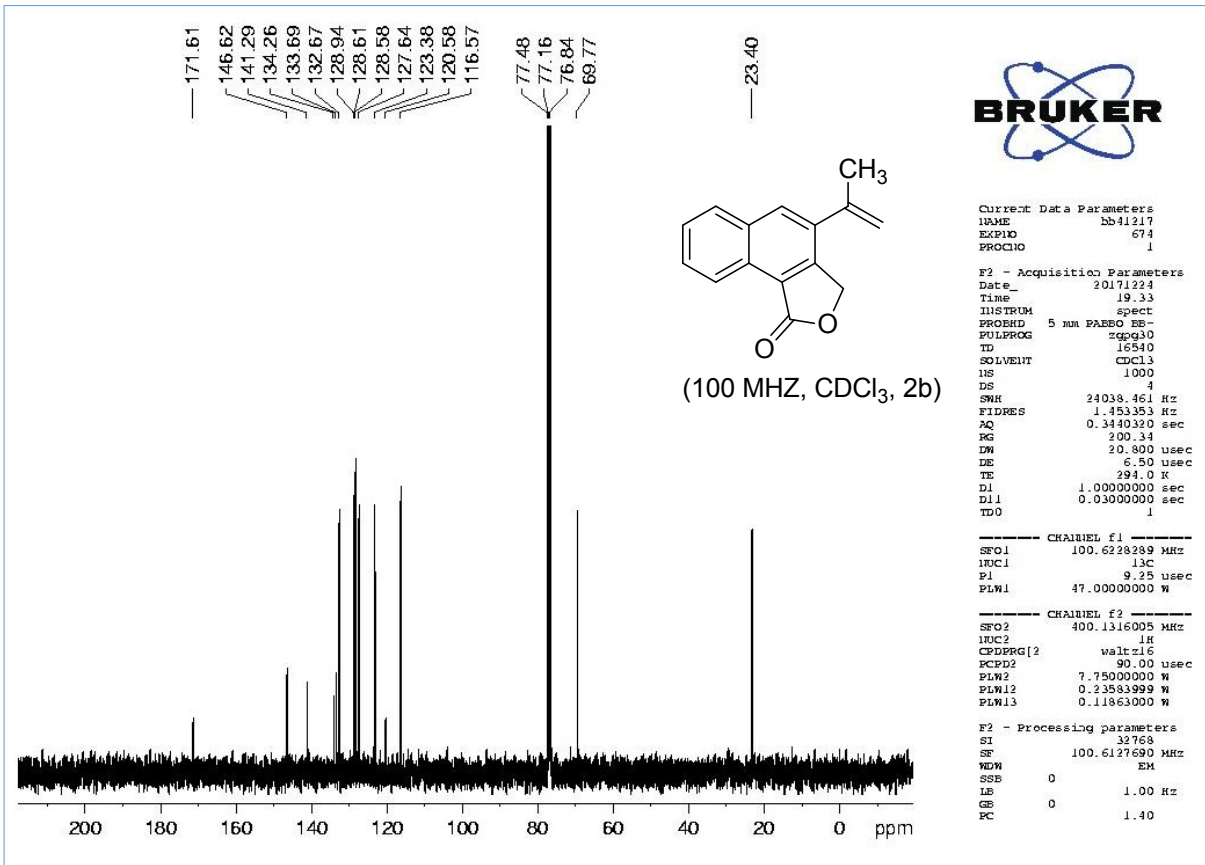



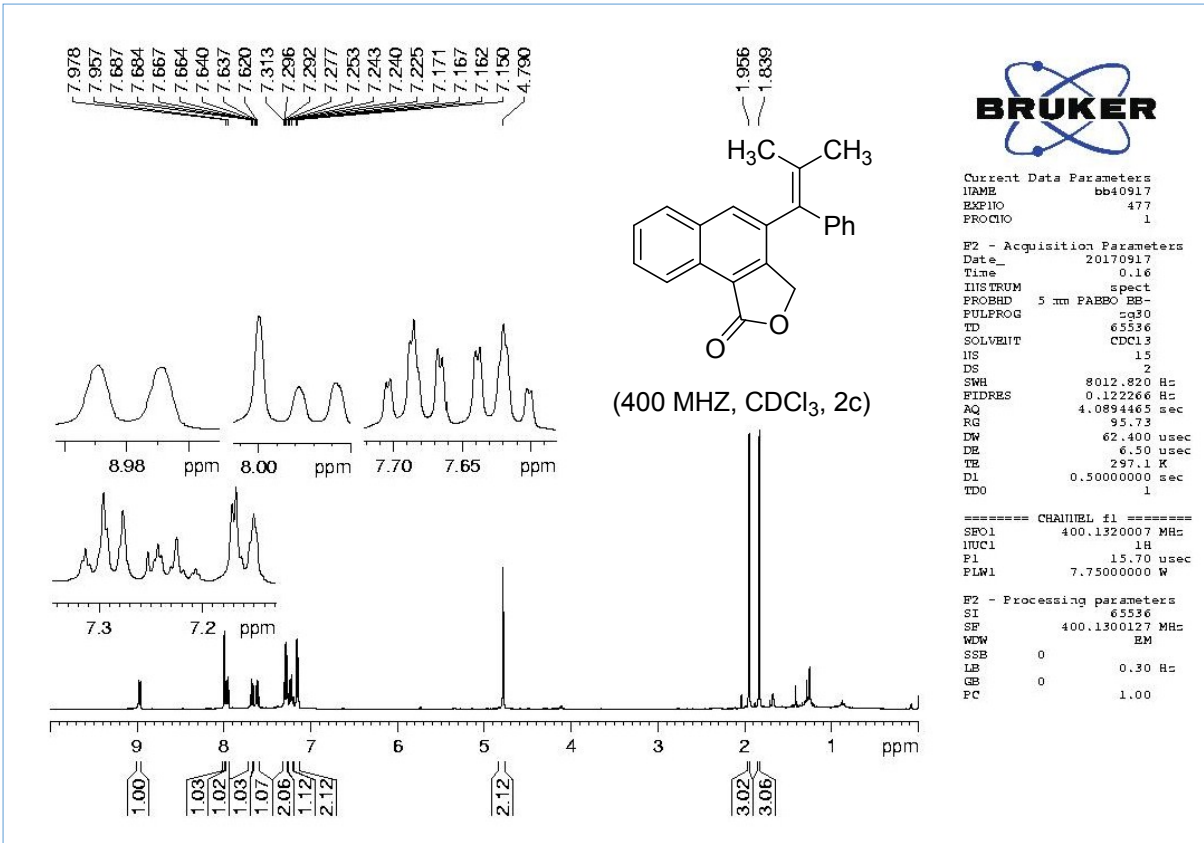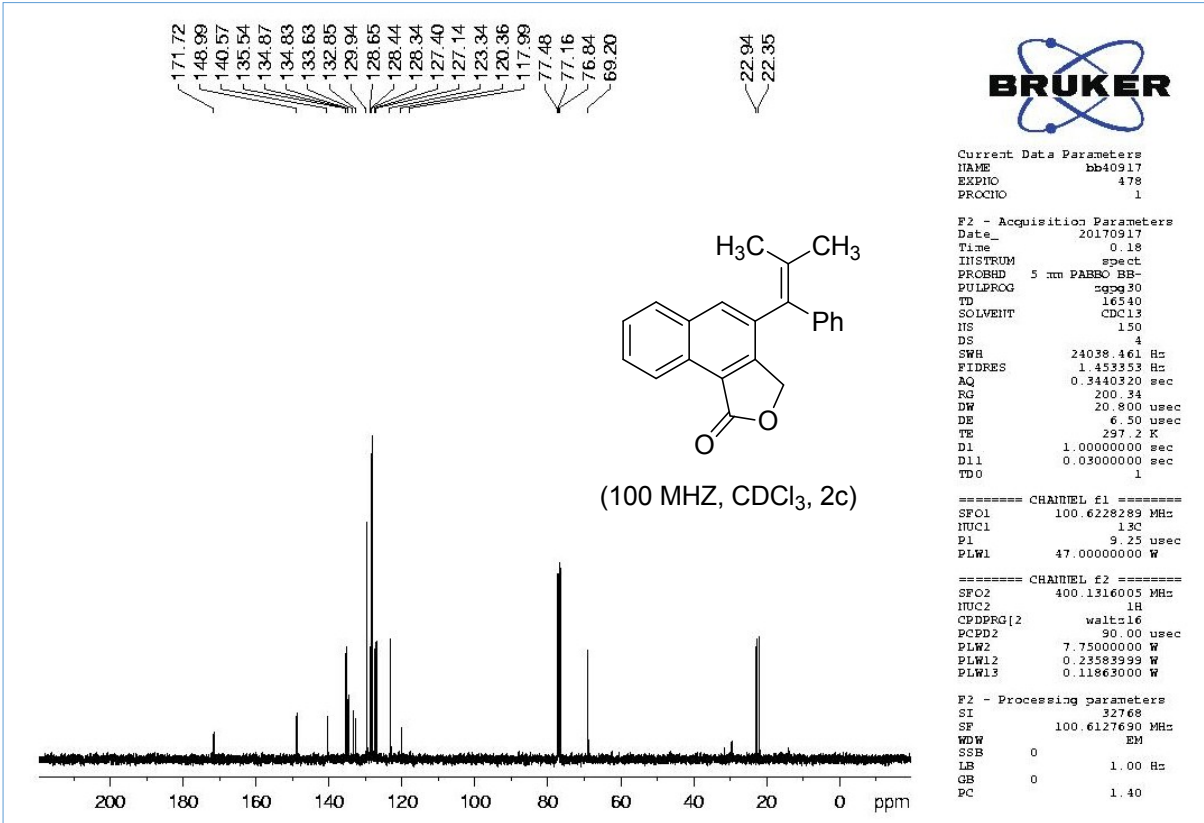

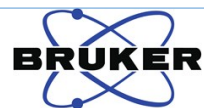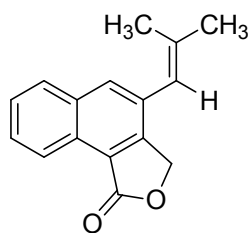

(400 MHz, CDCl<sub>3</sub>, 2d)

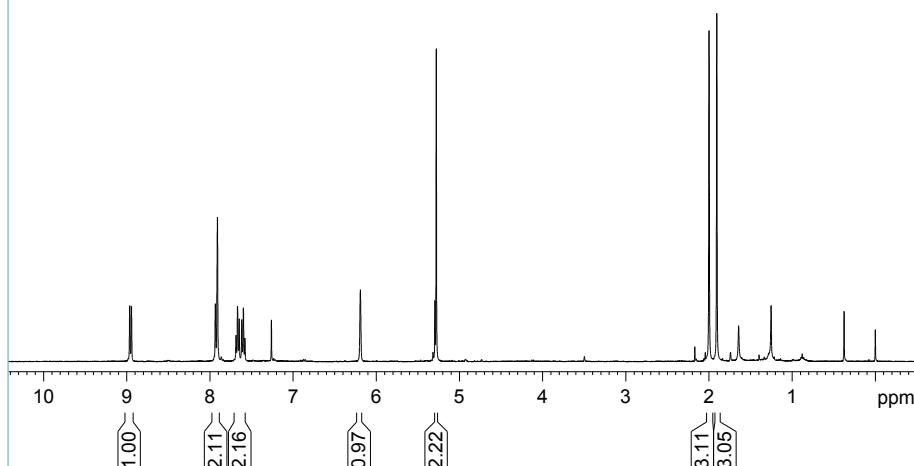

Current Data Parameters  
NAME Desktop  
EXPNO 619  
PROCNO 1

F2 - Acquisition Parameters  
Date\_ 20180724  
Time\_ 16.24  
INSTRUM spect  
PROBHD 5 mm PABBO BB-  
PULPROG zg30  
TD 65536  
SOLVENT CDCl3  
NS 9  
DS 2  
SWH 8012.820 Hz  
FIDRES 0.122266 Hz  
AQ 4.0894465 sec  
RG 169.77  
DW 62.400 usec  
DE 6.50 usec  
TE 295.4 K  
D1 0.50000000 sec  
TD0 1

===== CHANNEL f1 =====  
SFO1 400.1320007 MHz  
NUC1 1H  
P1 15.70 usec  
PLW1 7.75000000 W

F2 - Processing parameters  
SI 65536  
SF 400.1300088 MHz  
WDW EM  
SSB 0  
LB 0.30 Hz  
GB 0  
PC 1.00

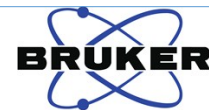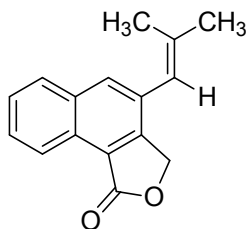

(100 MHz, CDCl<sub>3</sub>, 2d)

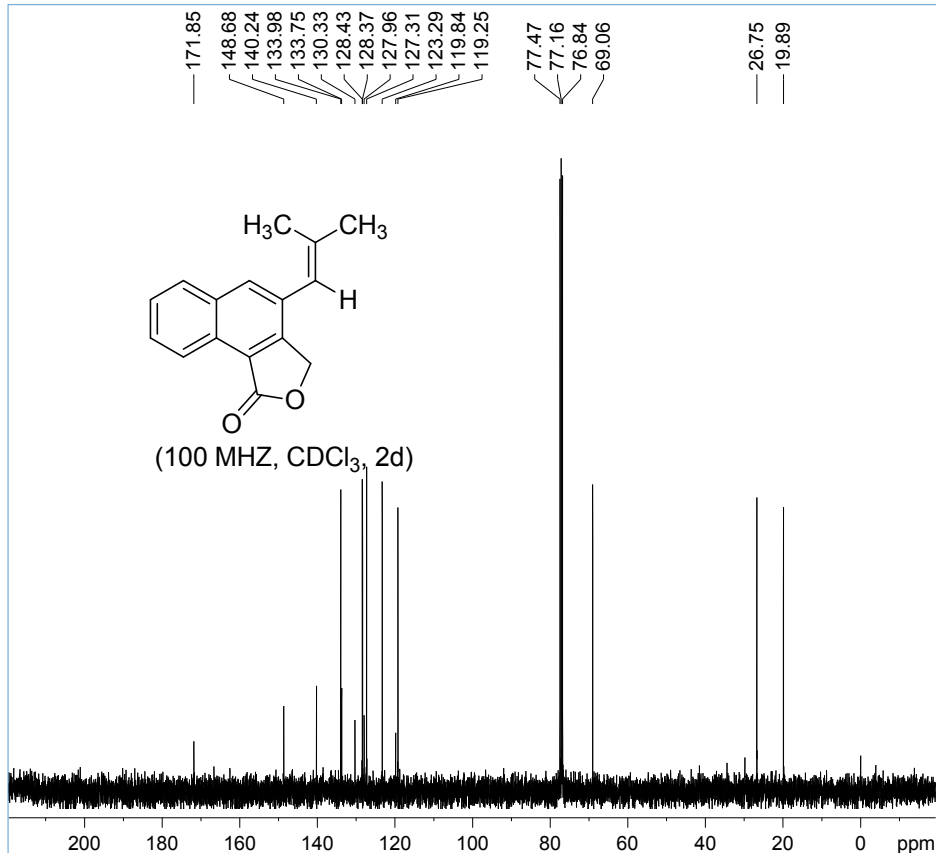

Current Data Parameters  
NAME Desktop  
EXPNO 620  
PROCNO 1

F2 - Acquisition Parameters  
Date\_ 20180724  
Time\_ 16.25  
INSTRUM spect  
PROBHD 5 mm PABBO BB-  
PULPROG zgpg30  
TD 16540  
SOLVENT CDCl3  
NS 125  
DS 4  
SWH 24038.461 Hz  
FIDRES 1.453353 Hz  
AQ 0.3440320 sec  
RG 200.34  
DW 20.800 usec  
DE 6.50 usec  
TE 295.5 K  
D1 1.00000000 sec  
D11 0.03000000 sec  
TD0 1

===== CHANNEL f1 =====  
SFO1 100.6228289 MHz  
NUC1 13C  
P1 9.25 usec  
PLW1 47.00000000 W

===== CHANNEL f2 =====  
SFO2 400.1316005 MHz  
NUC2 1H  
CPDPRG2 waltz16  
PCPD2 90.00 usec  
PLW2 7.75000000 W  
PLW12 0.23583999 W  
PLW13 0.11863000 W

F2 - Processing parameters  
SI 32768  
SF 100.6127577 MHz  
WDW EM  
SSB 0  
LB 1.00 Hz  
GB 0  
PC 1.40

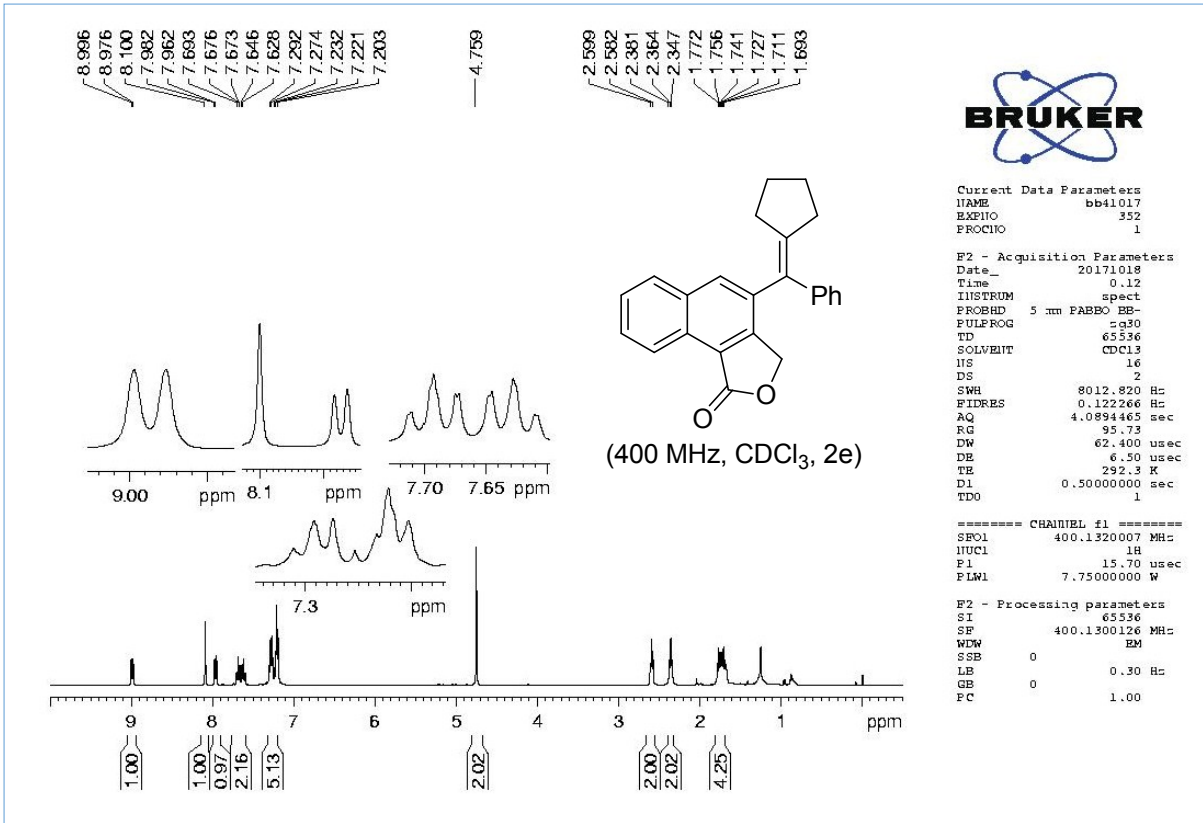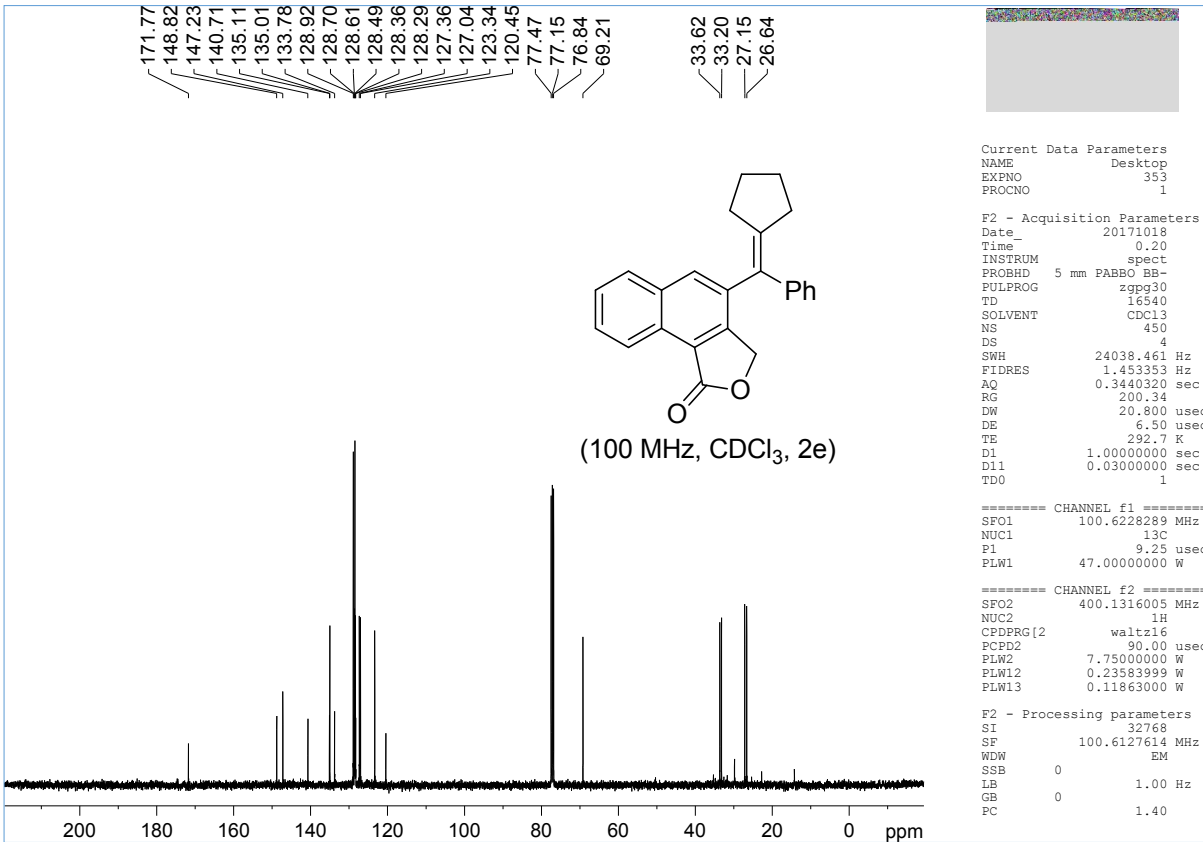

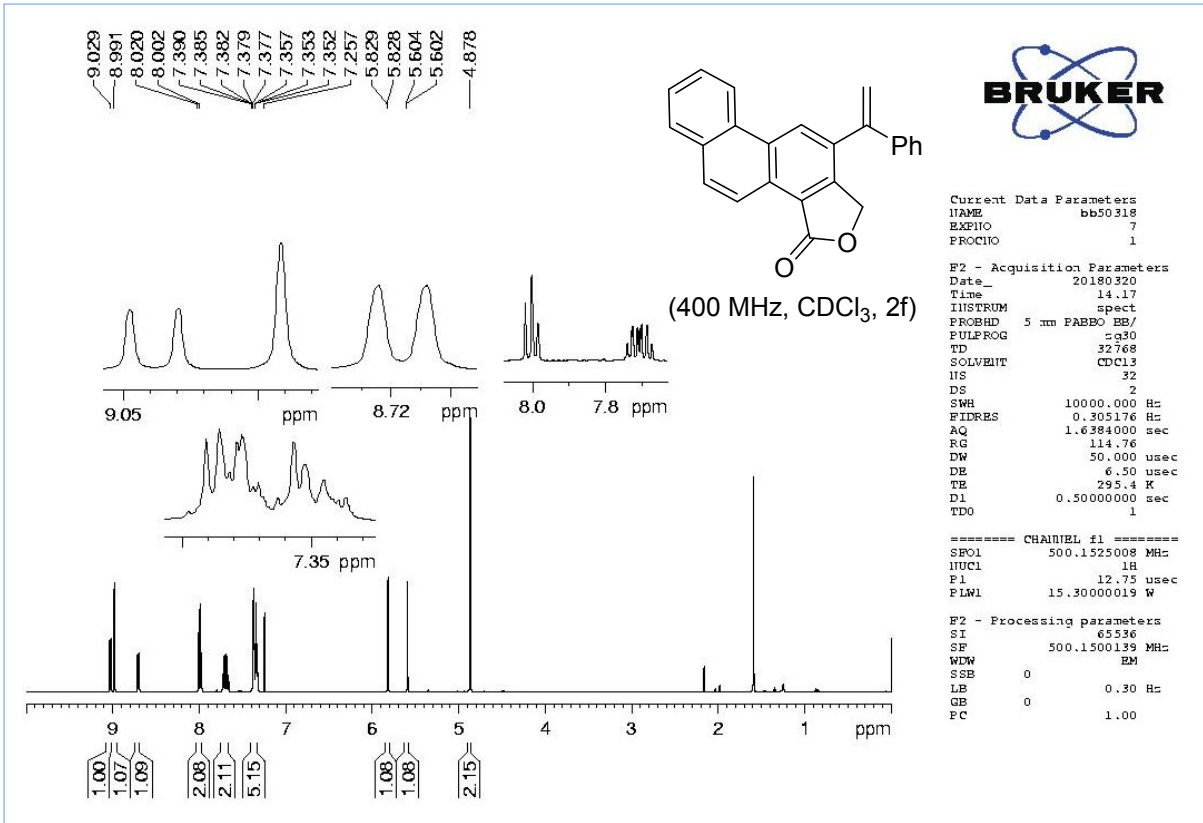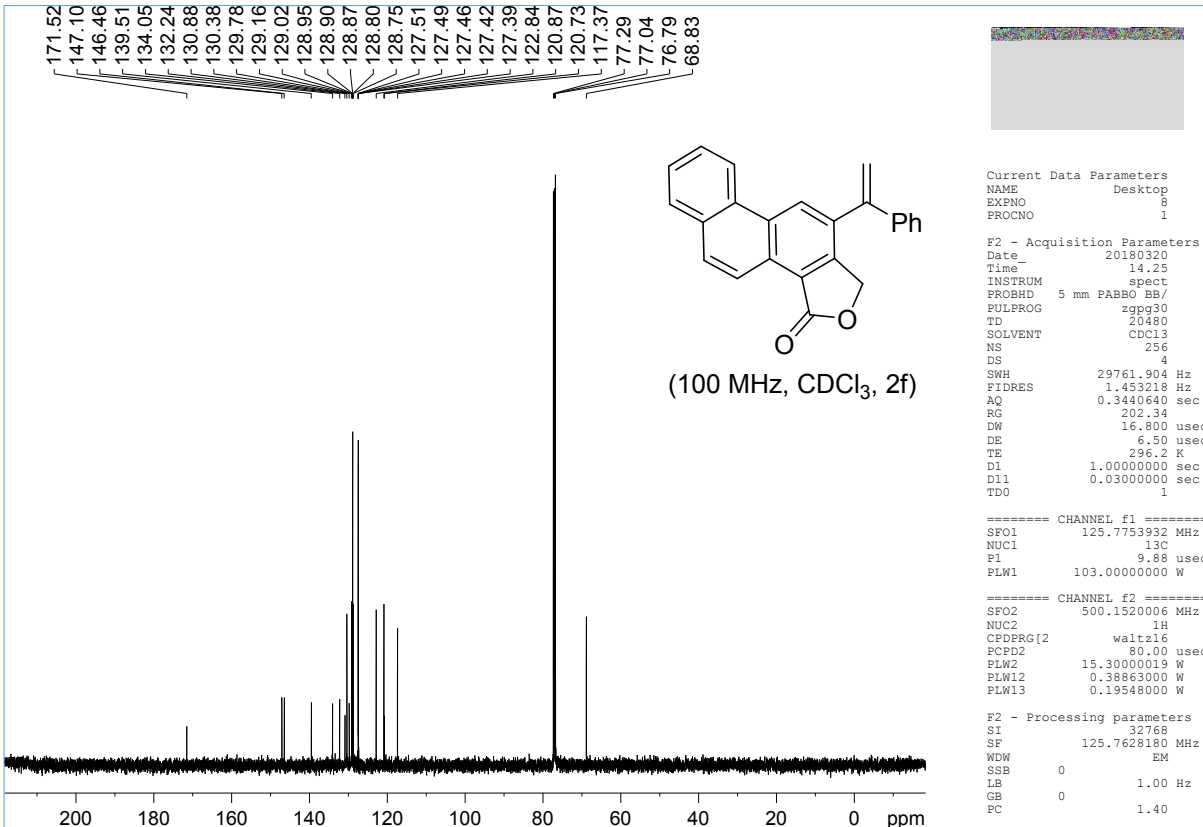

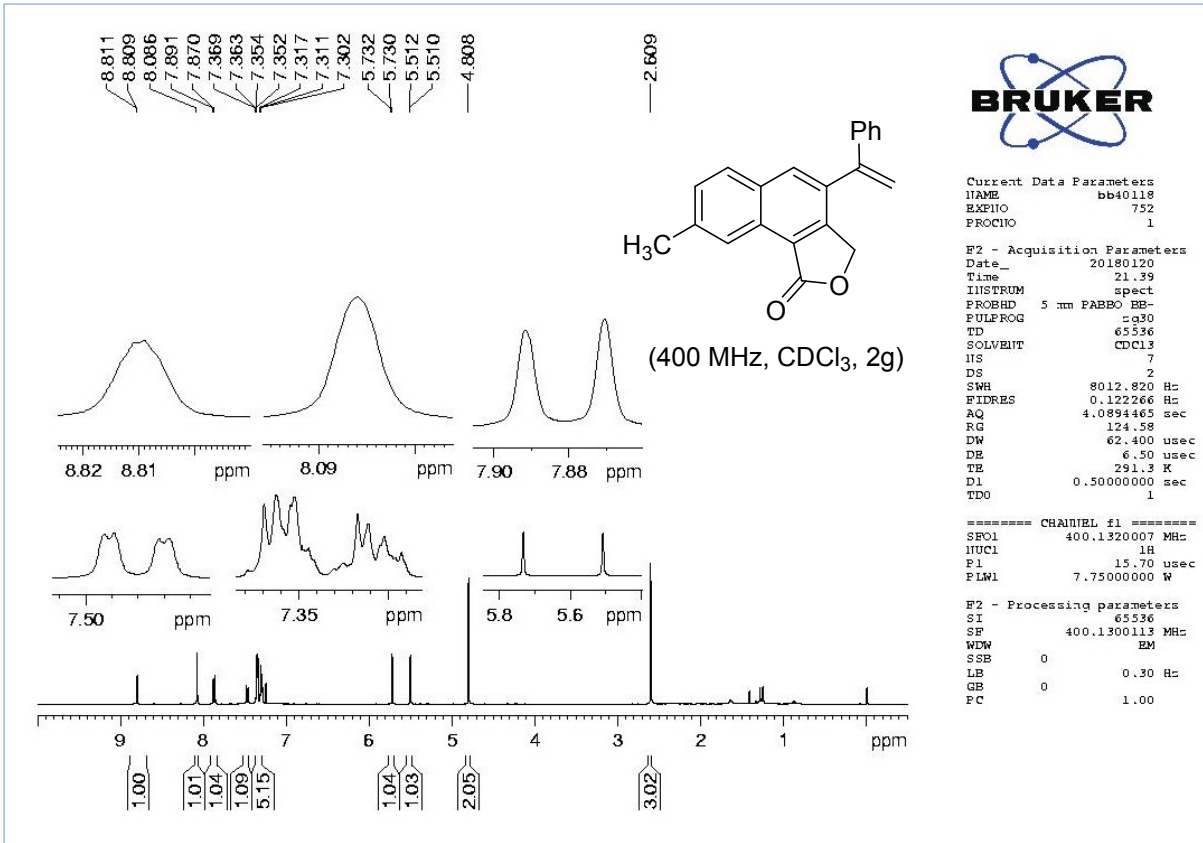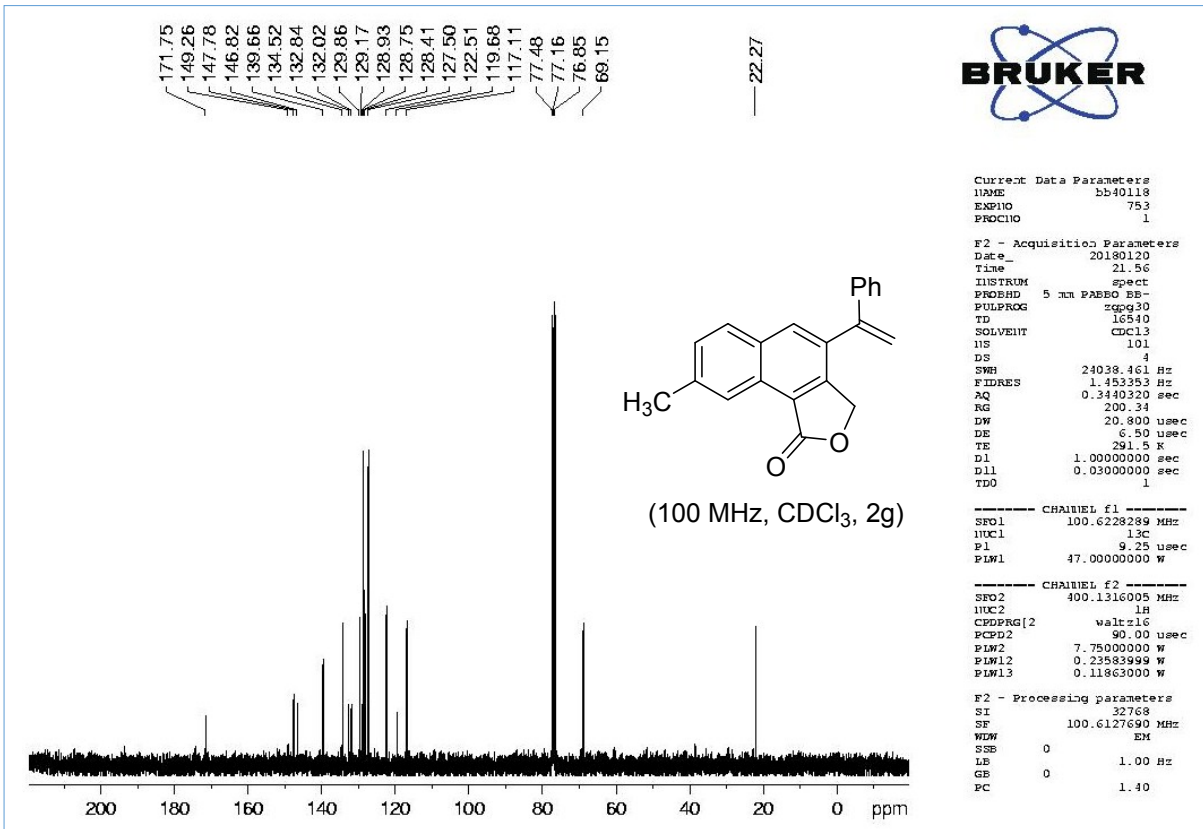

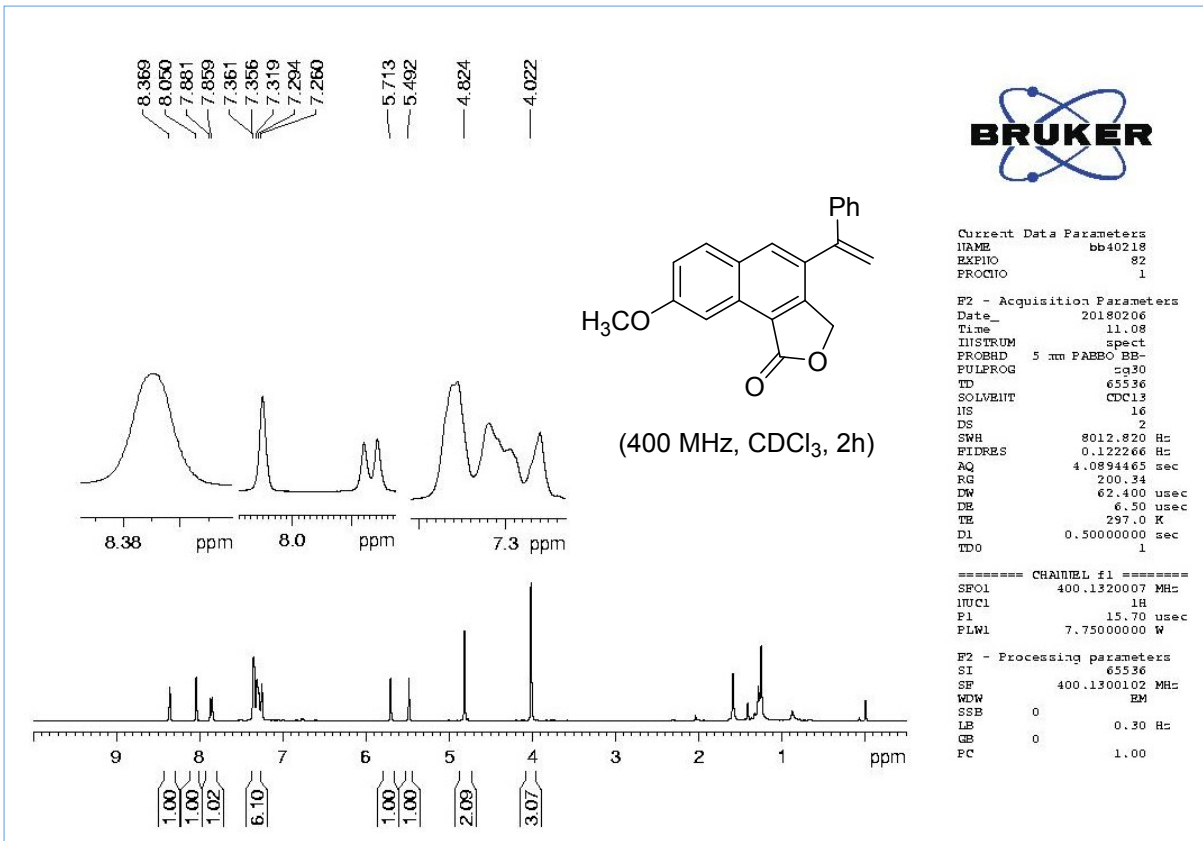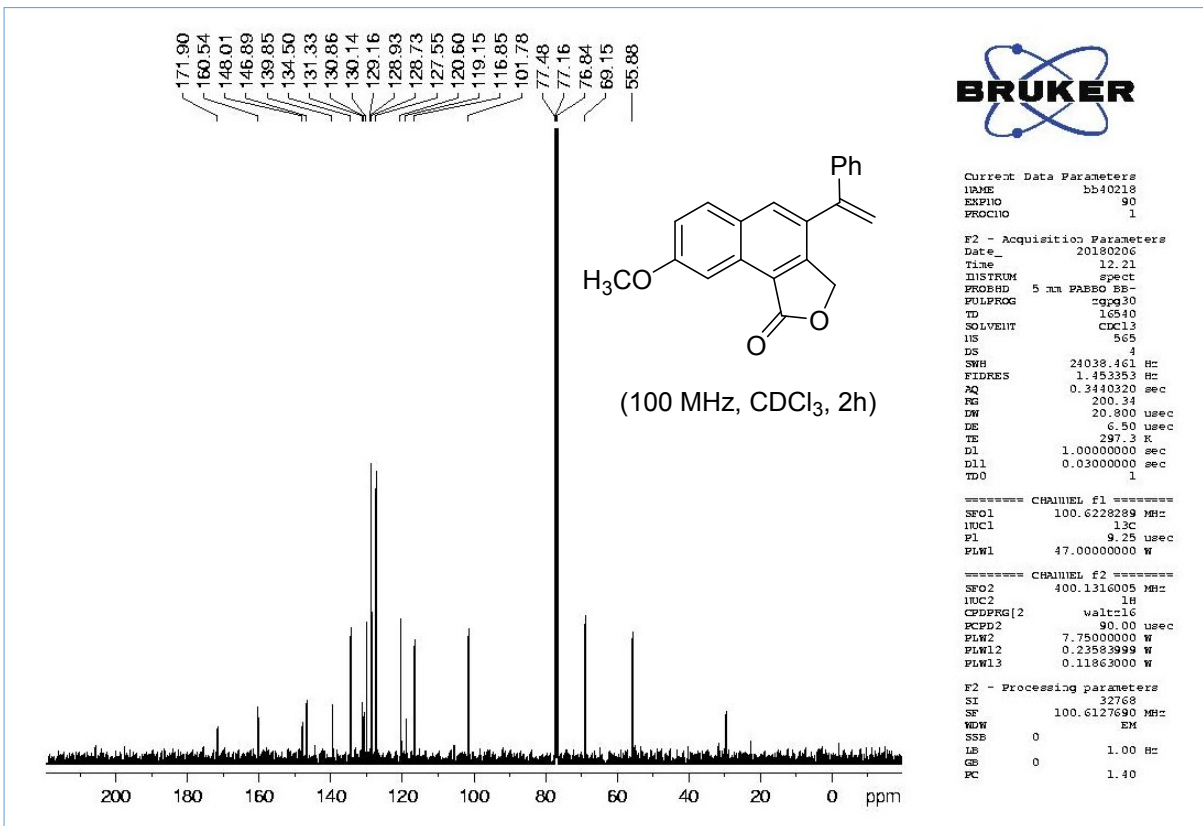



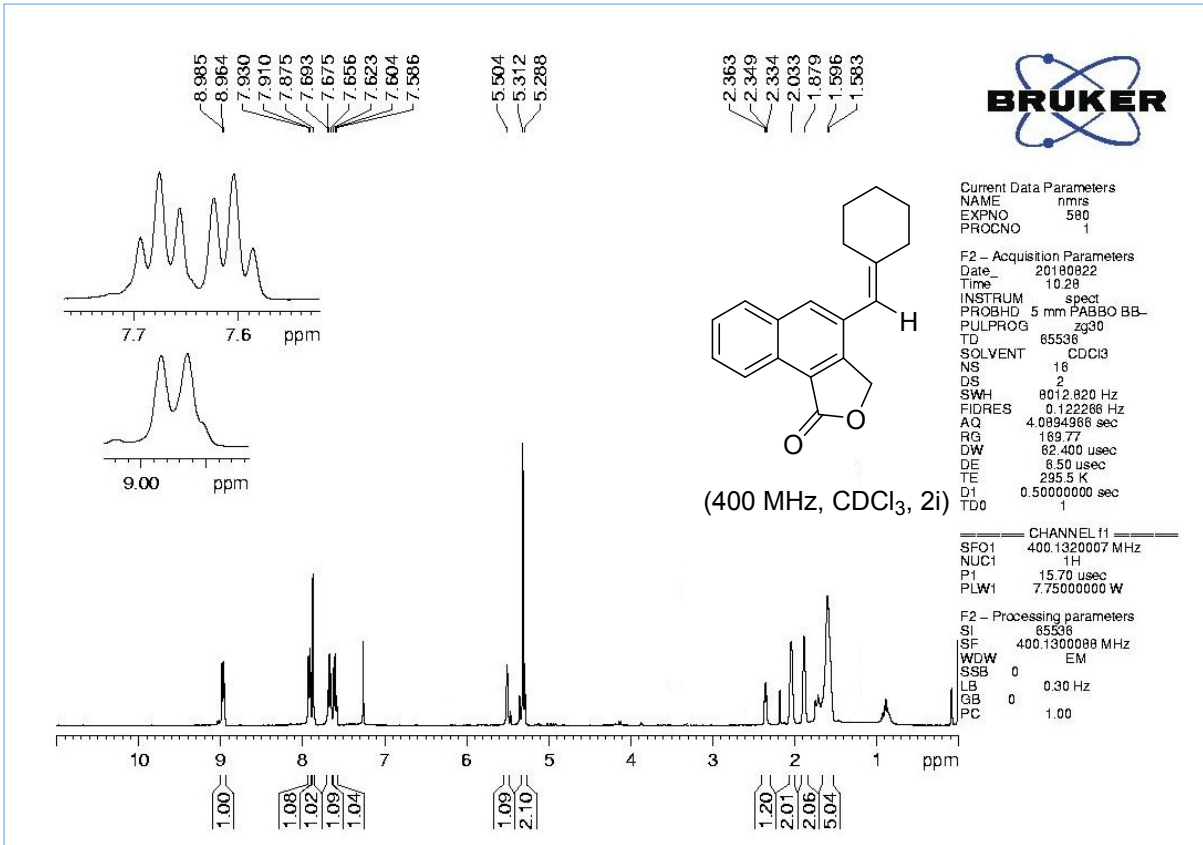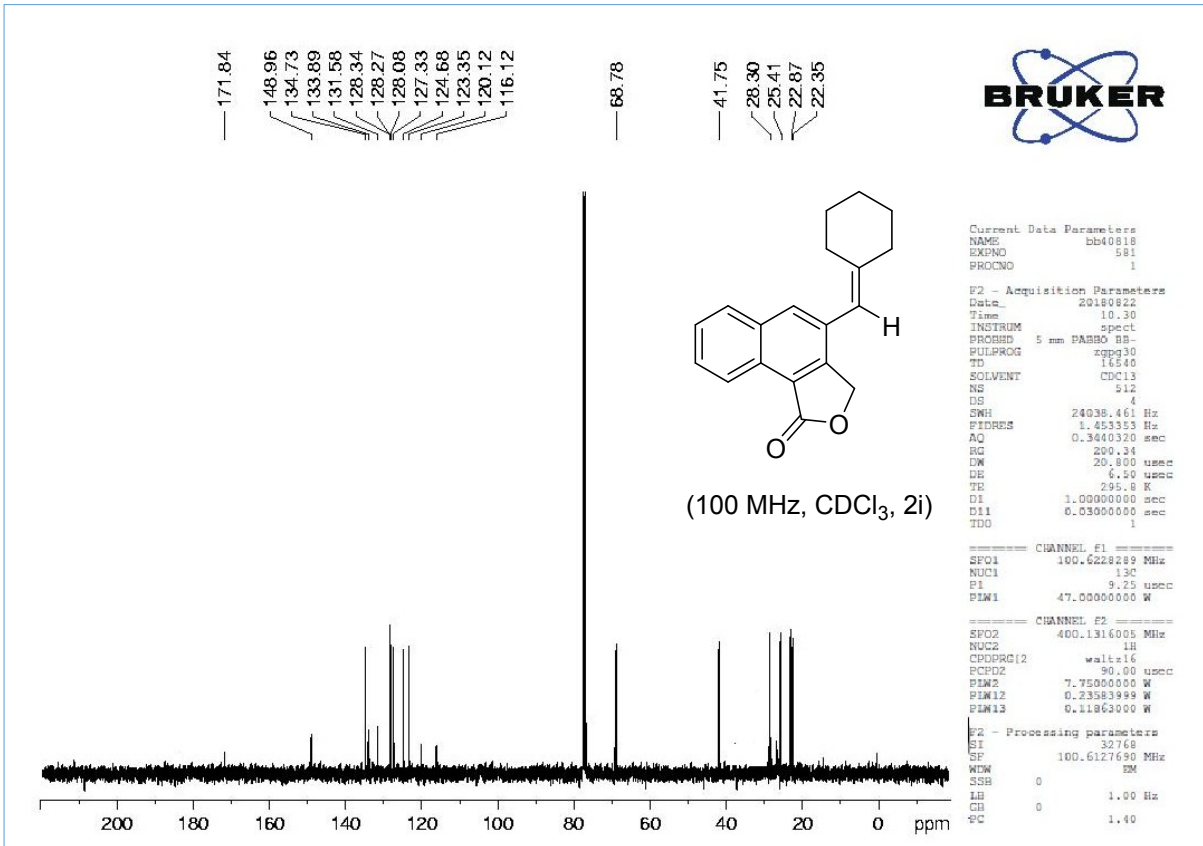

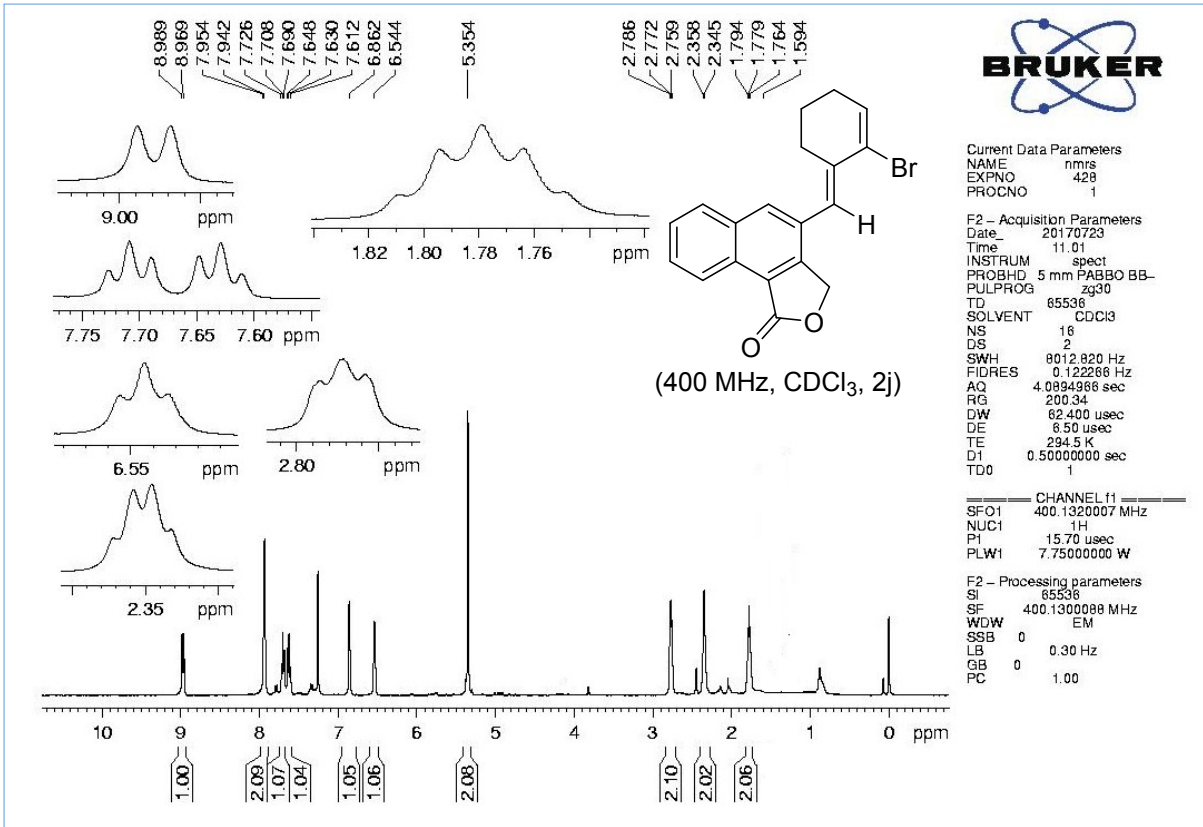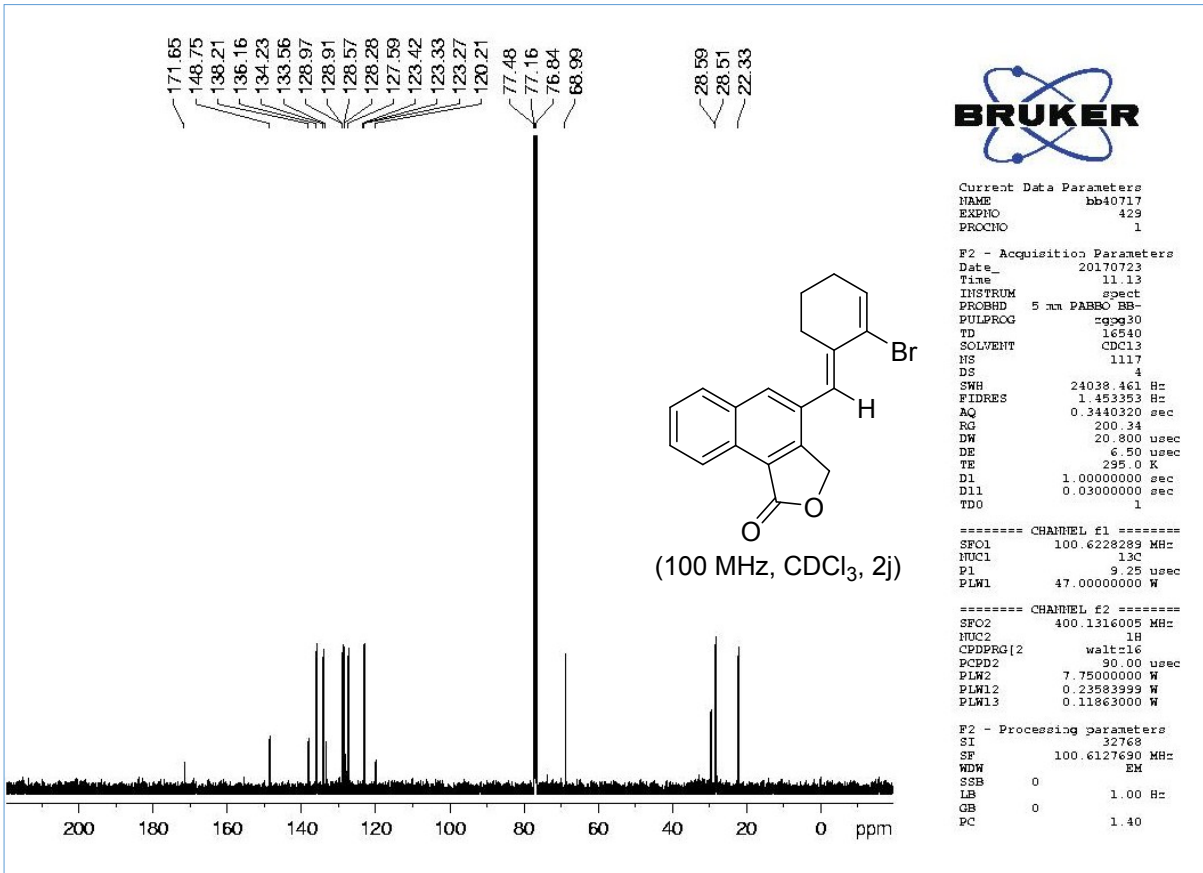



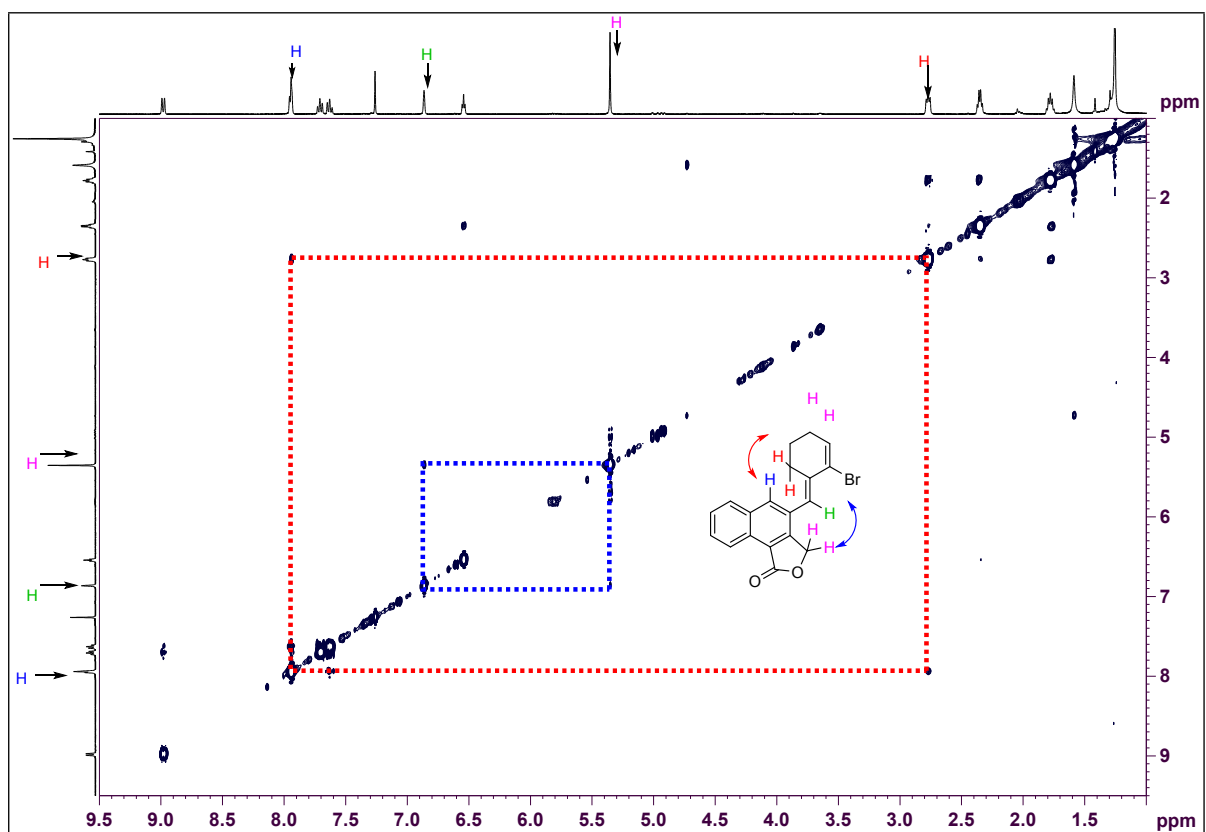

H<sup>1</sup>-H<sup>1</sup> 2D NOESY (Nuclear Overhauser Effect Spectroscopy) of **2j** compound

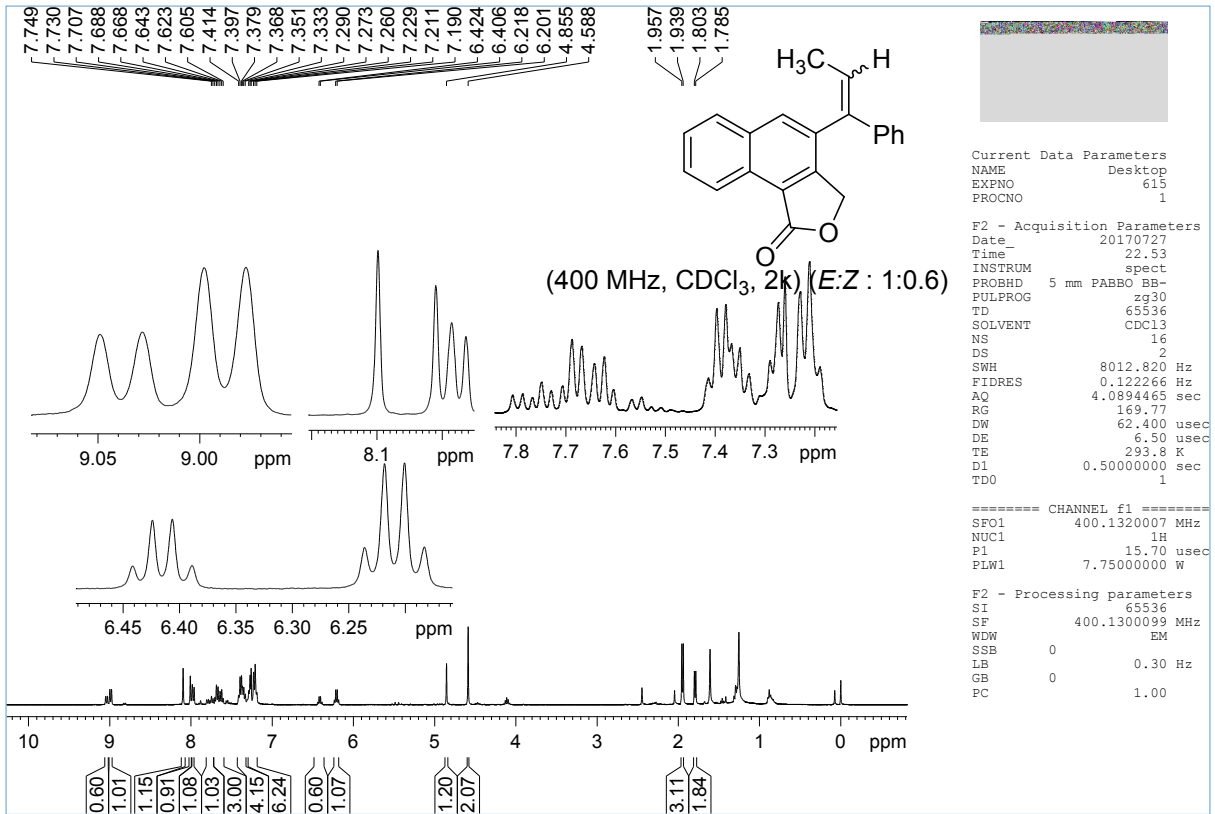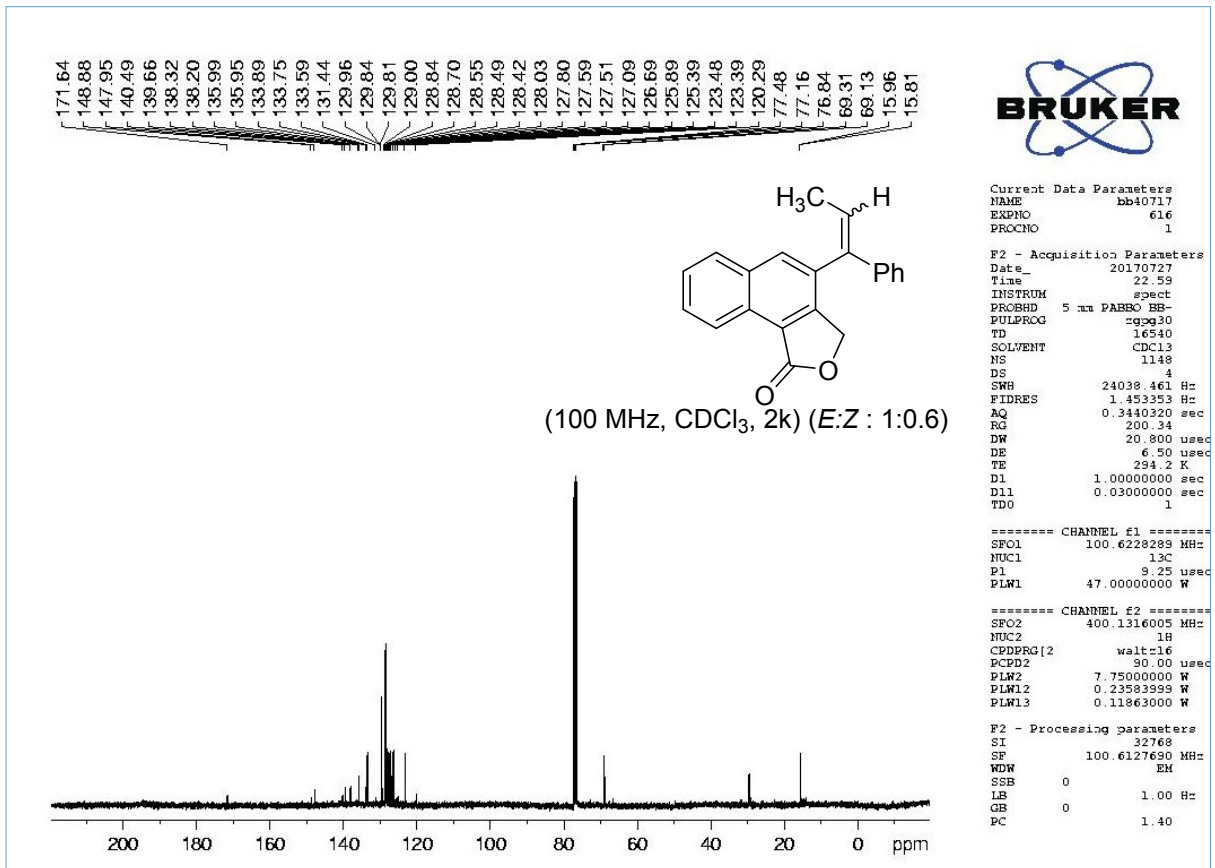

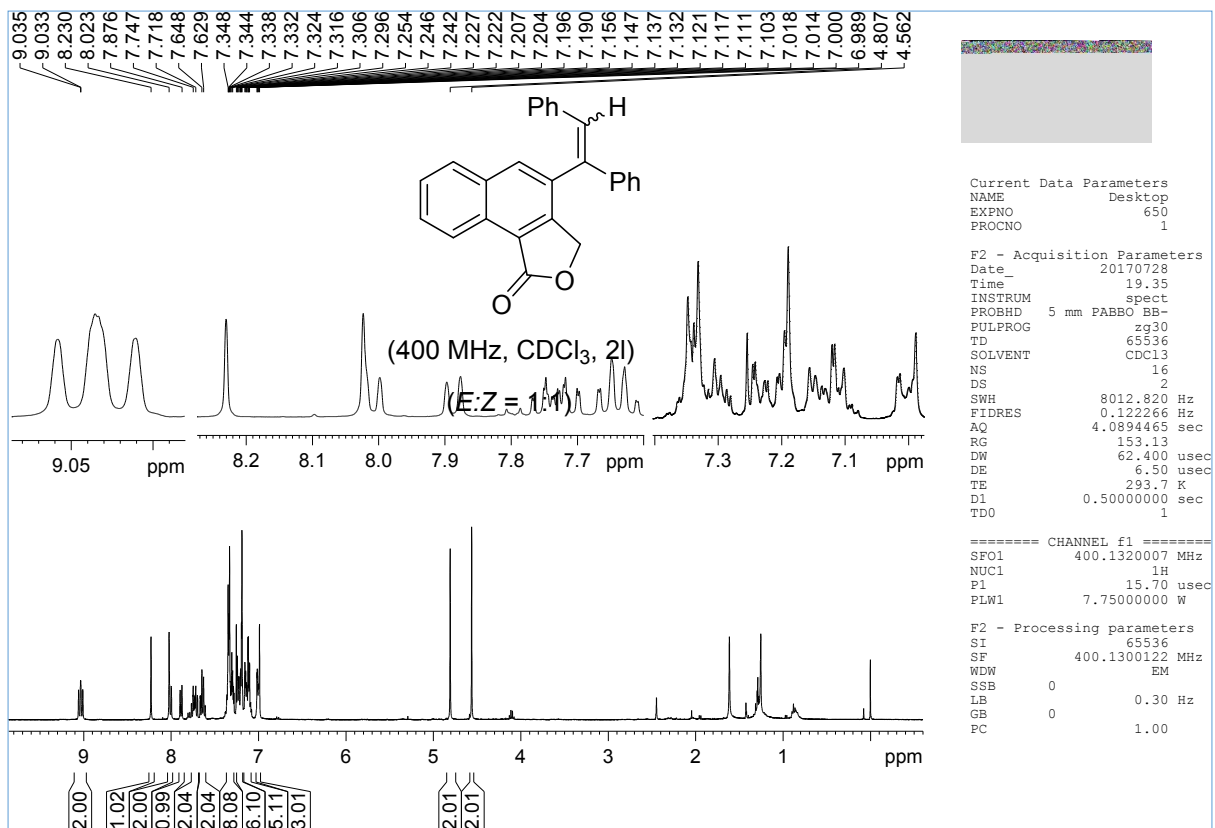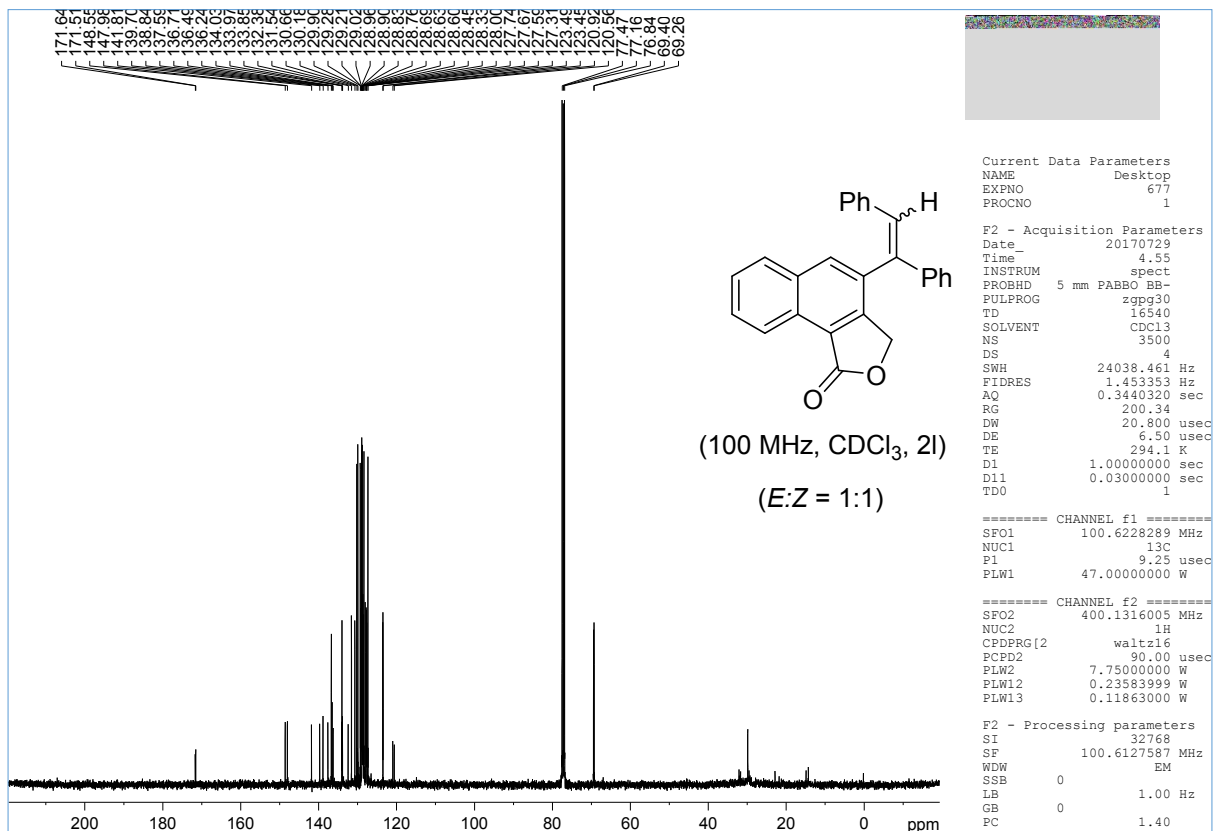

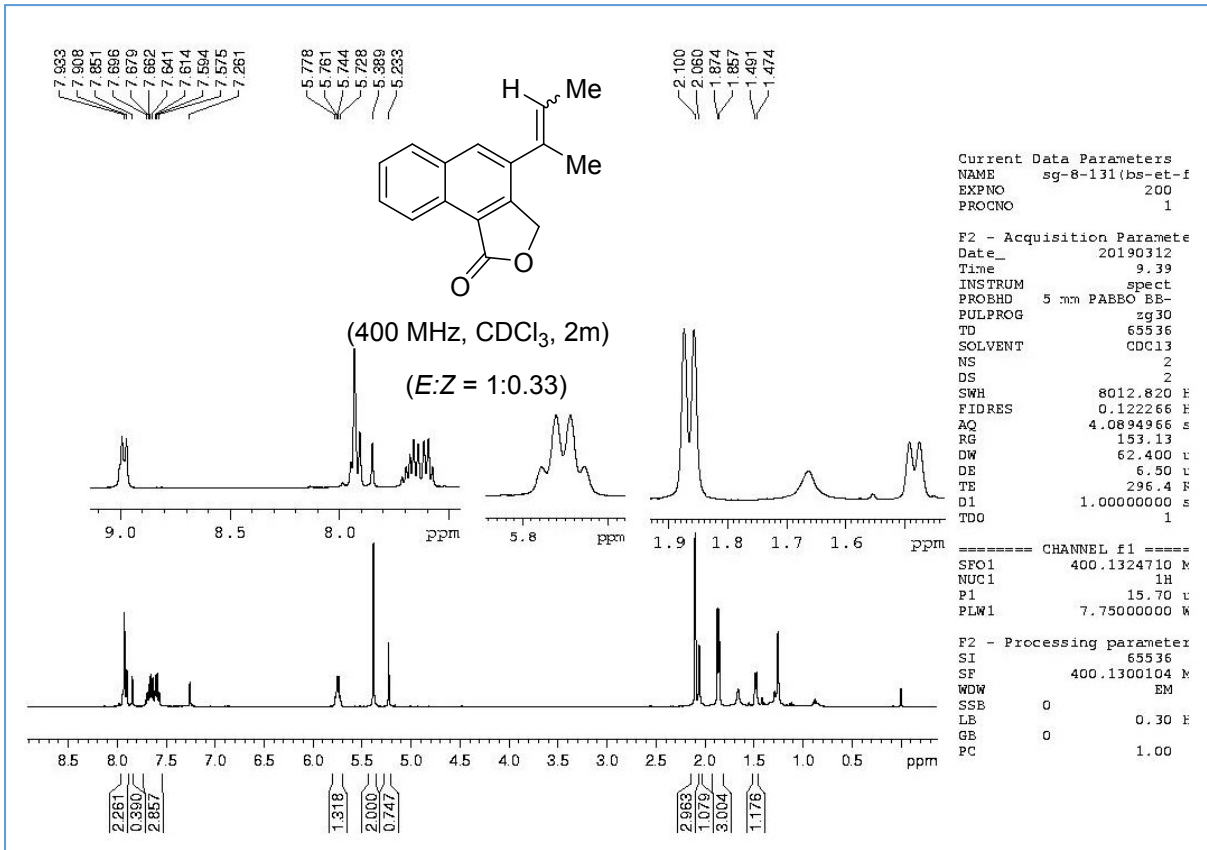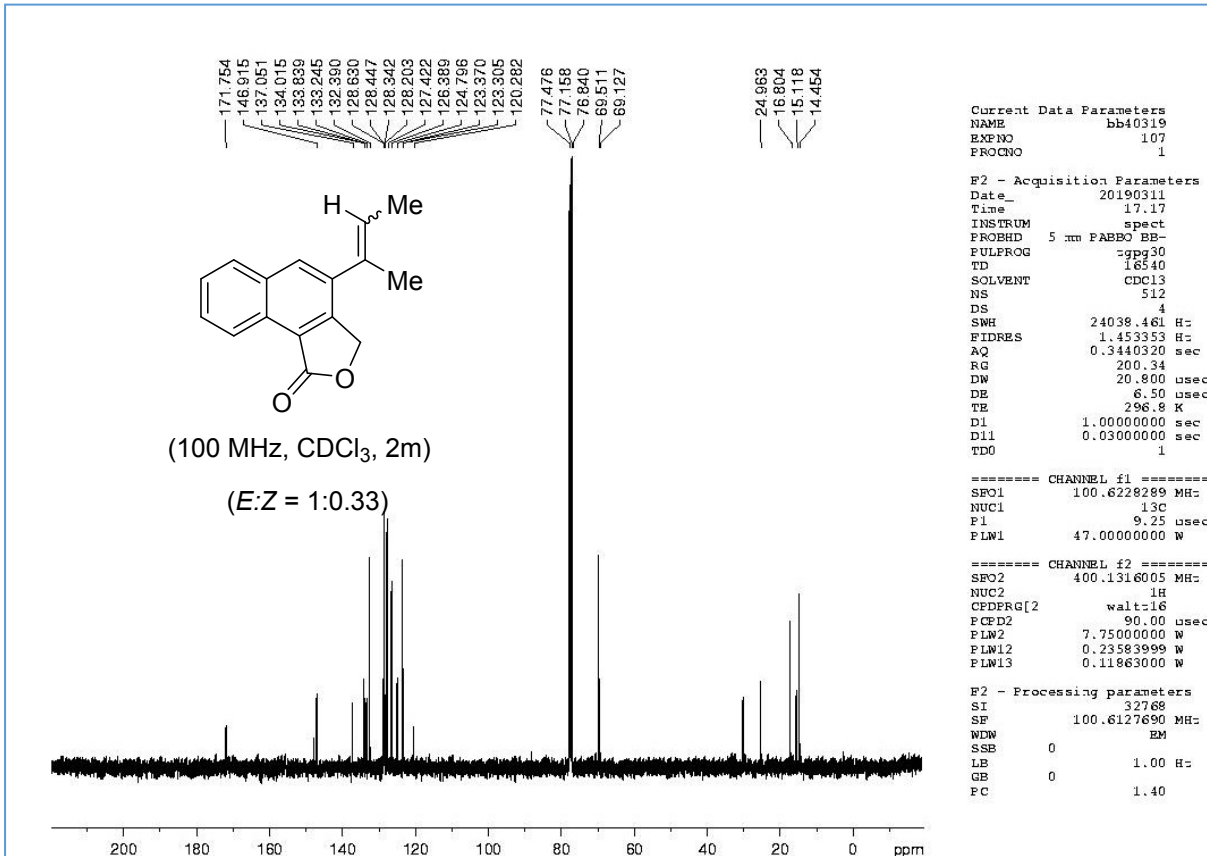

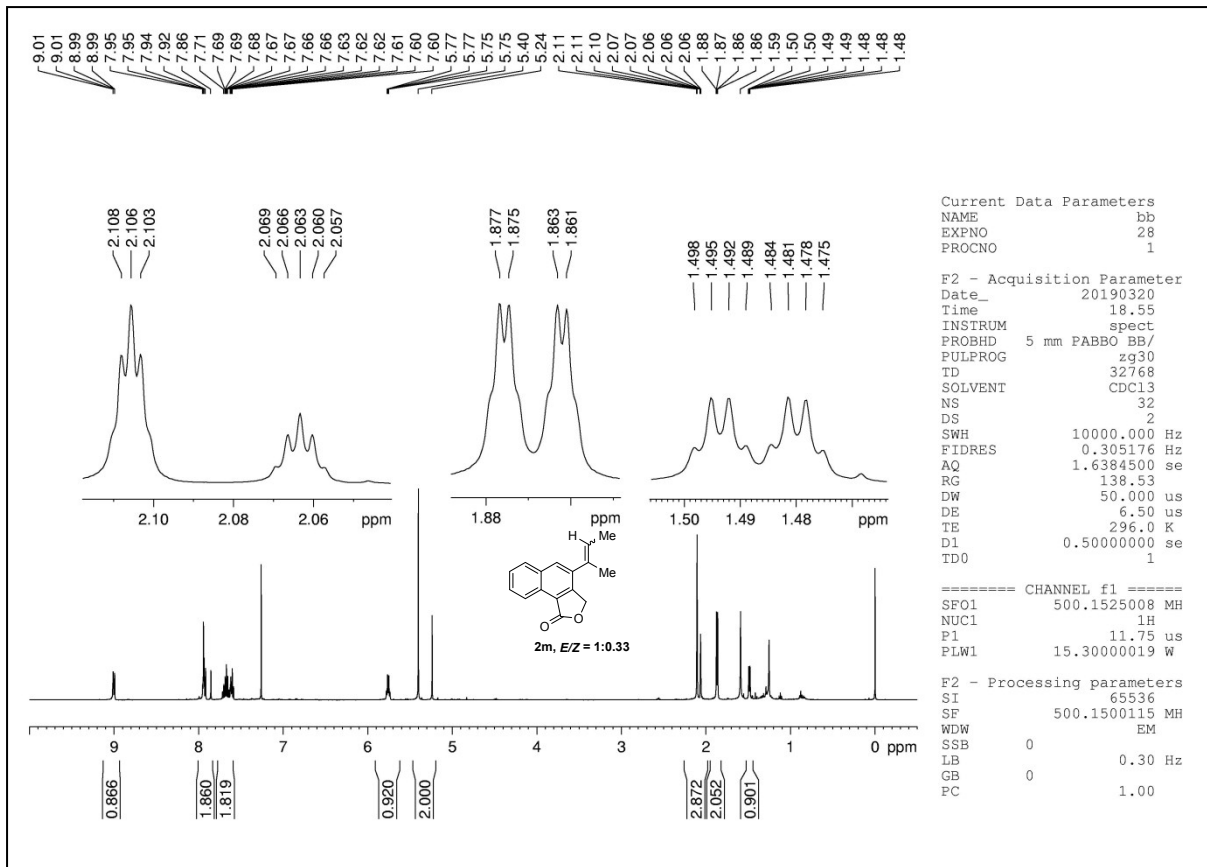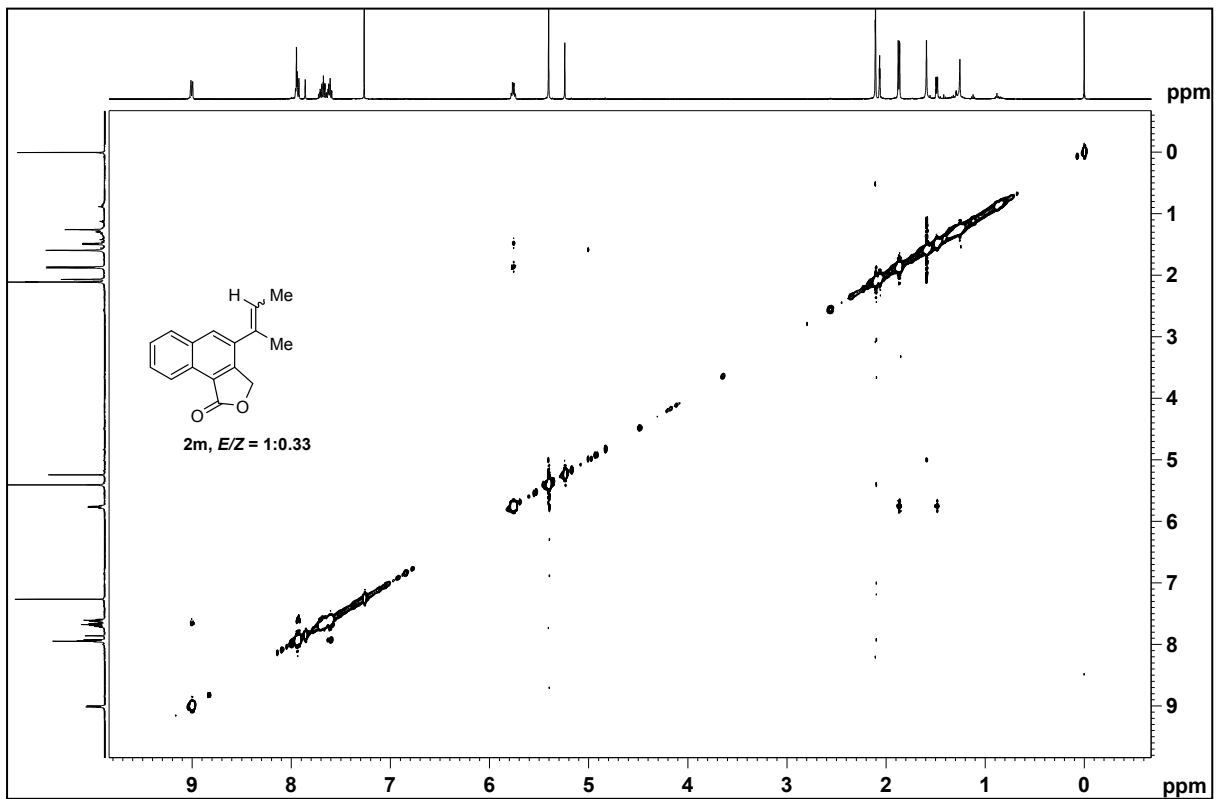

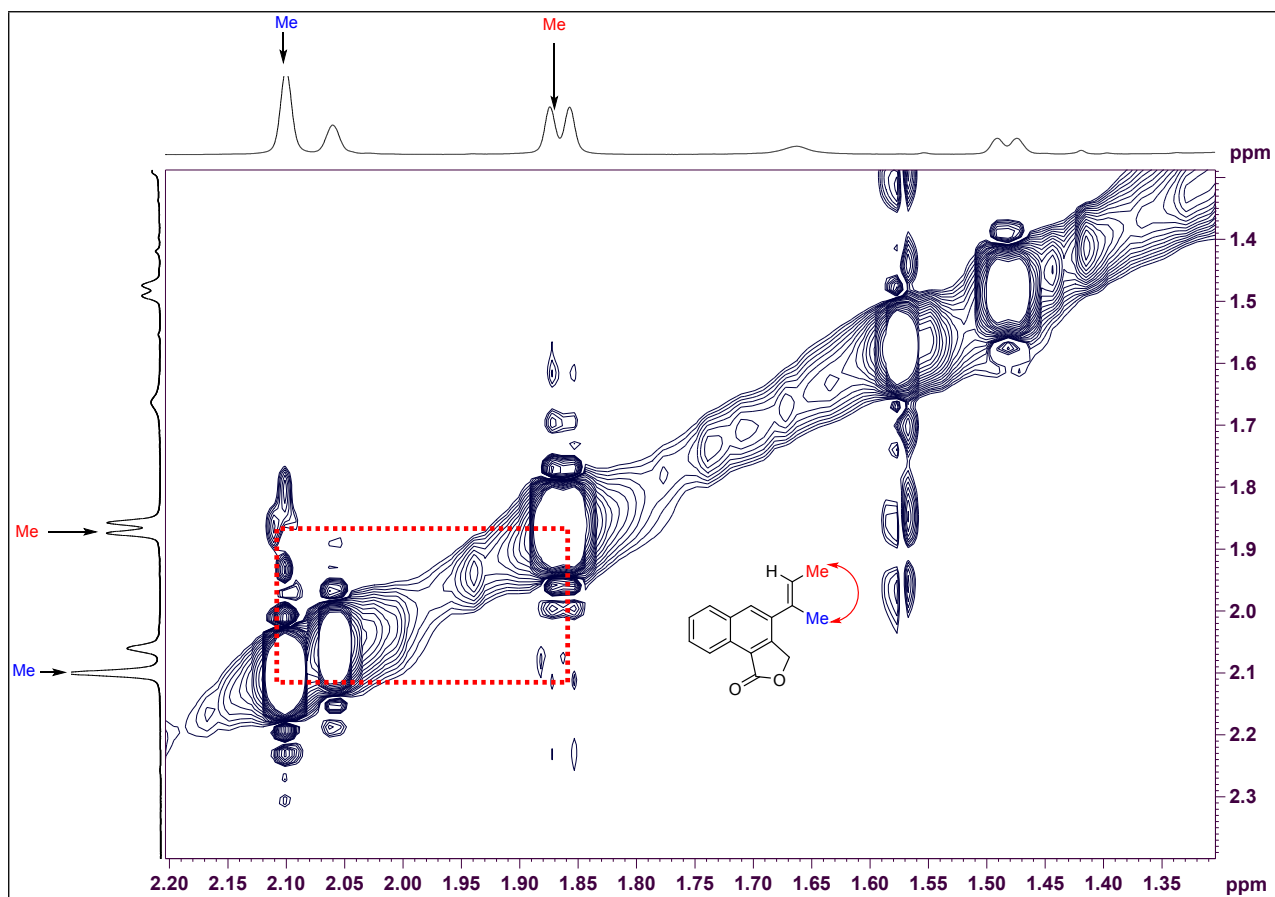

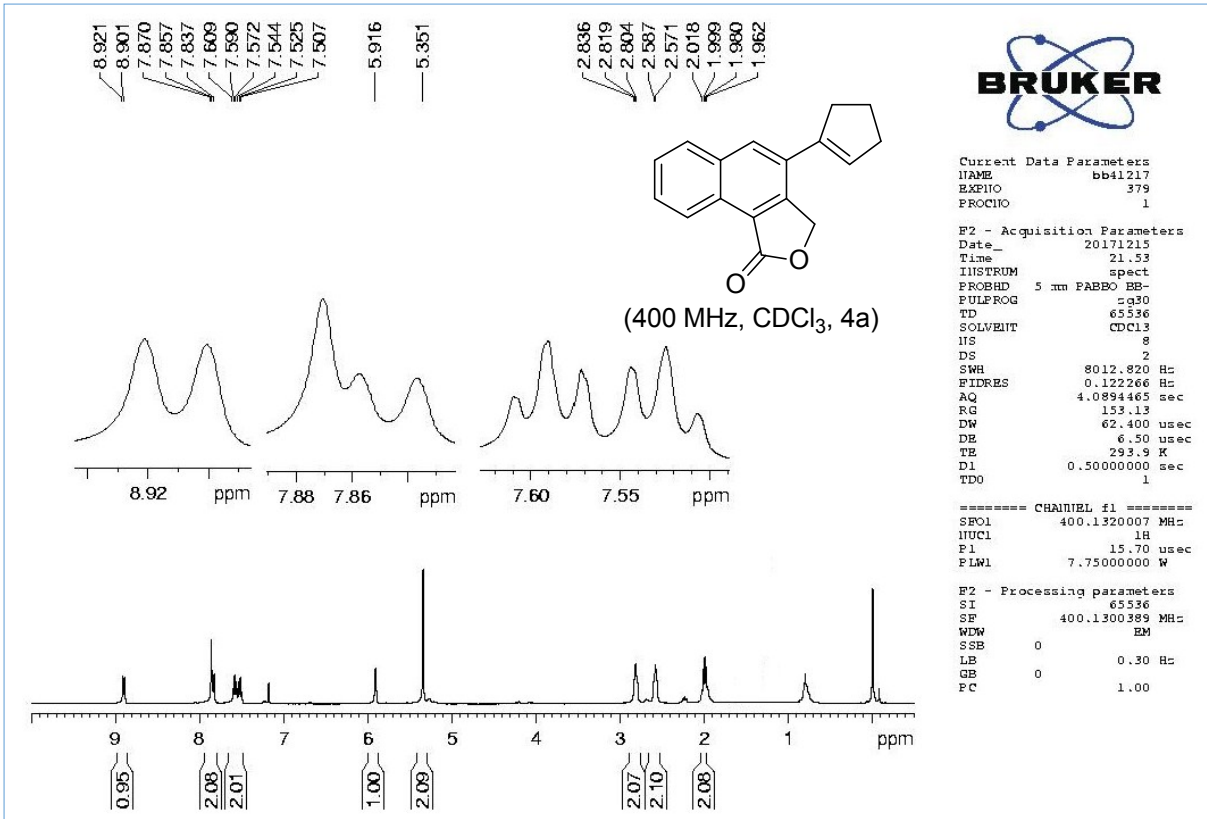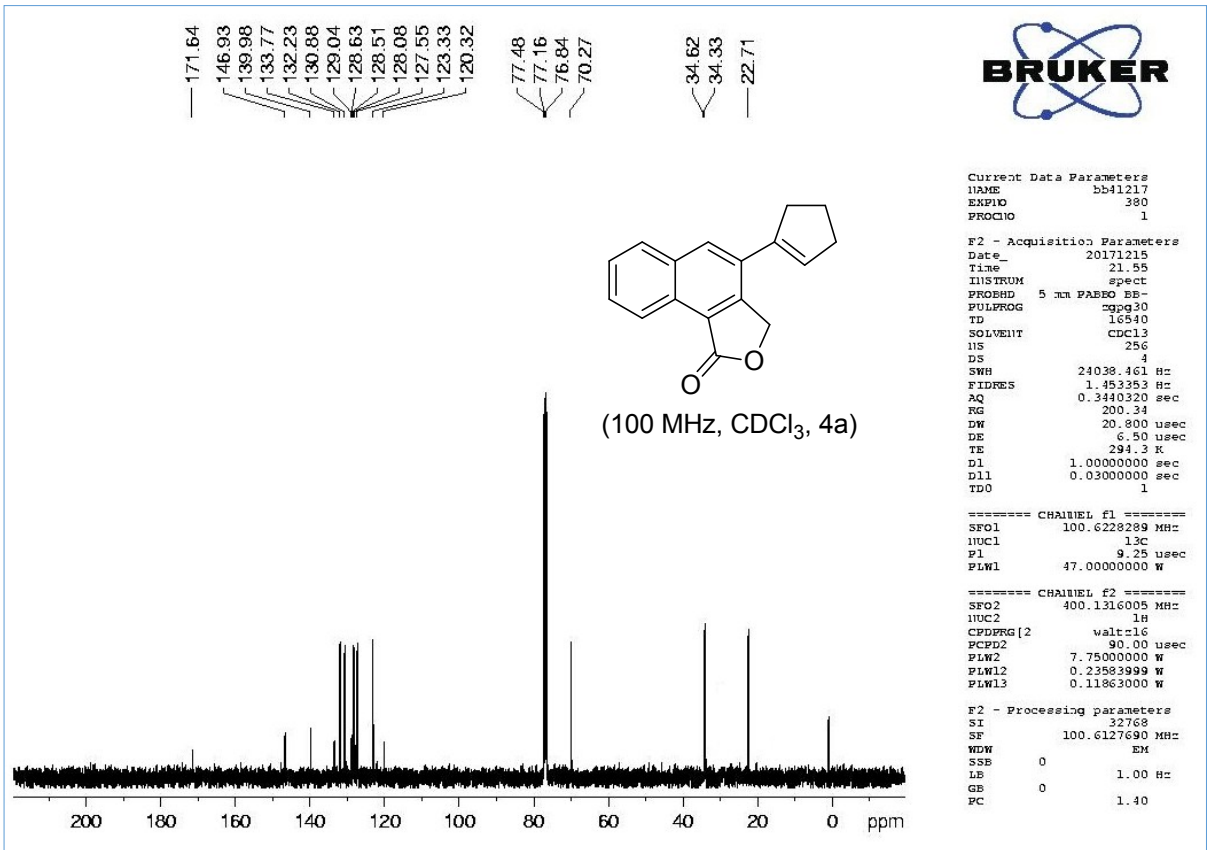

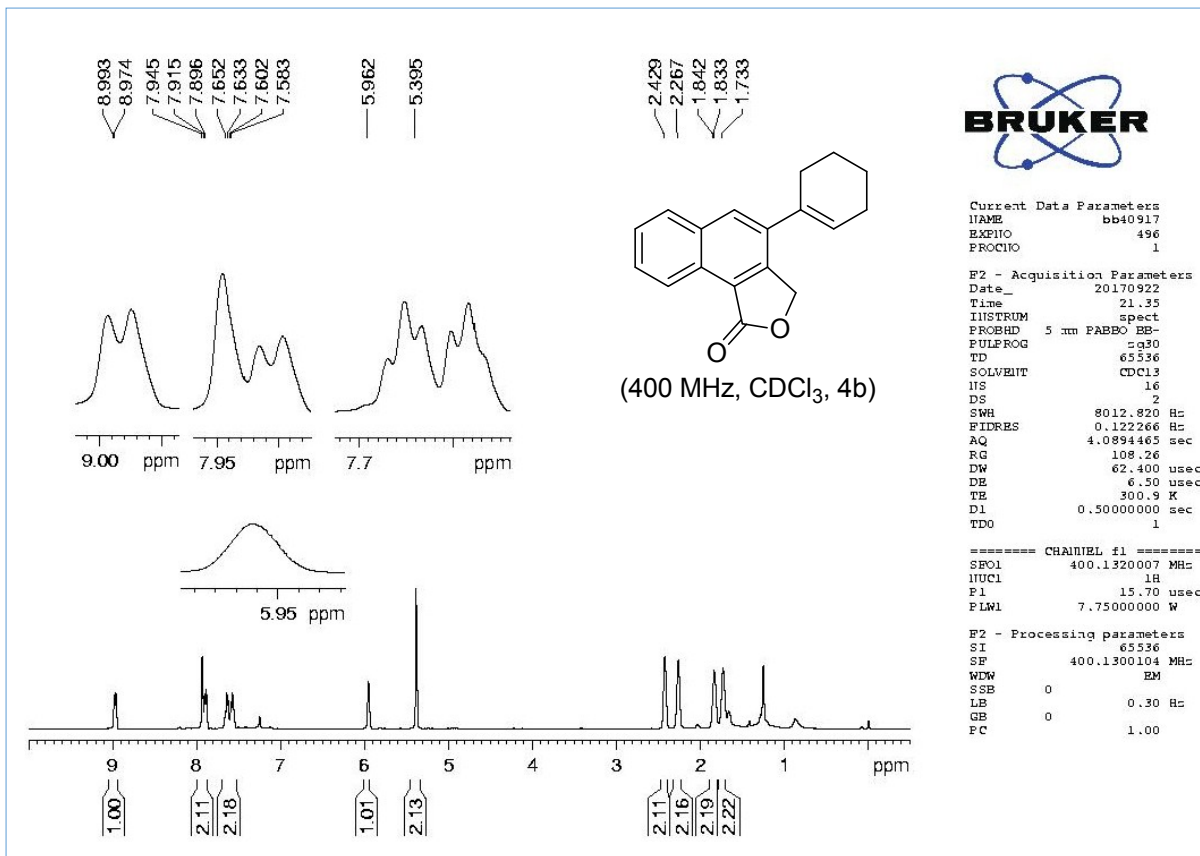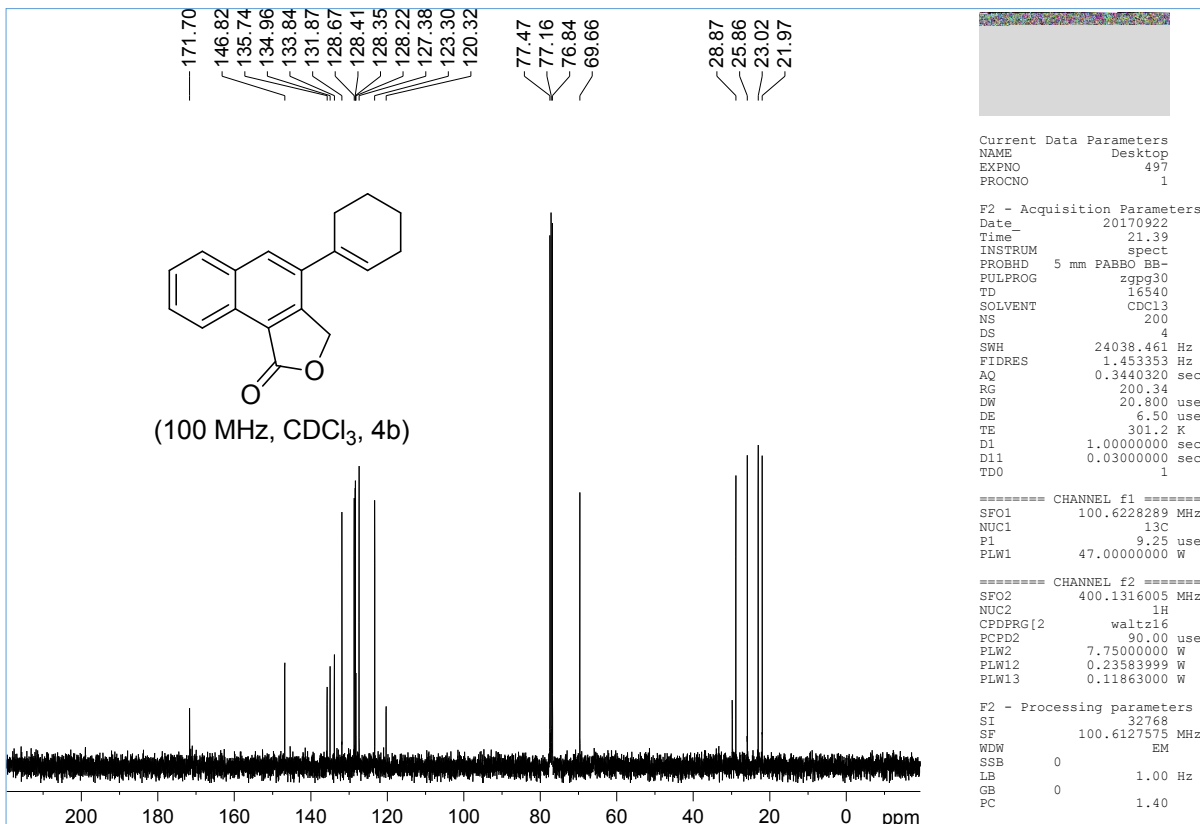



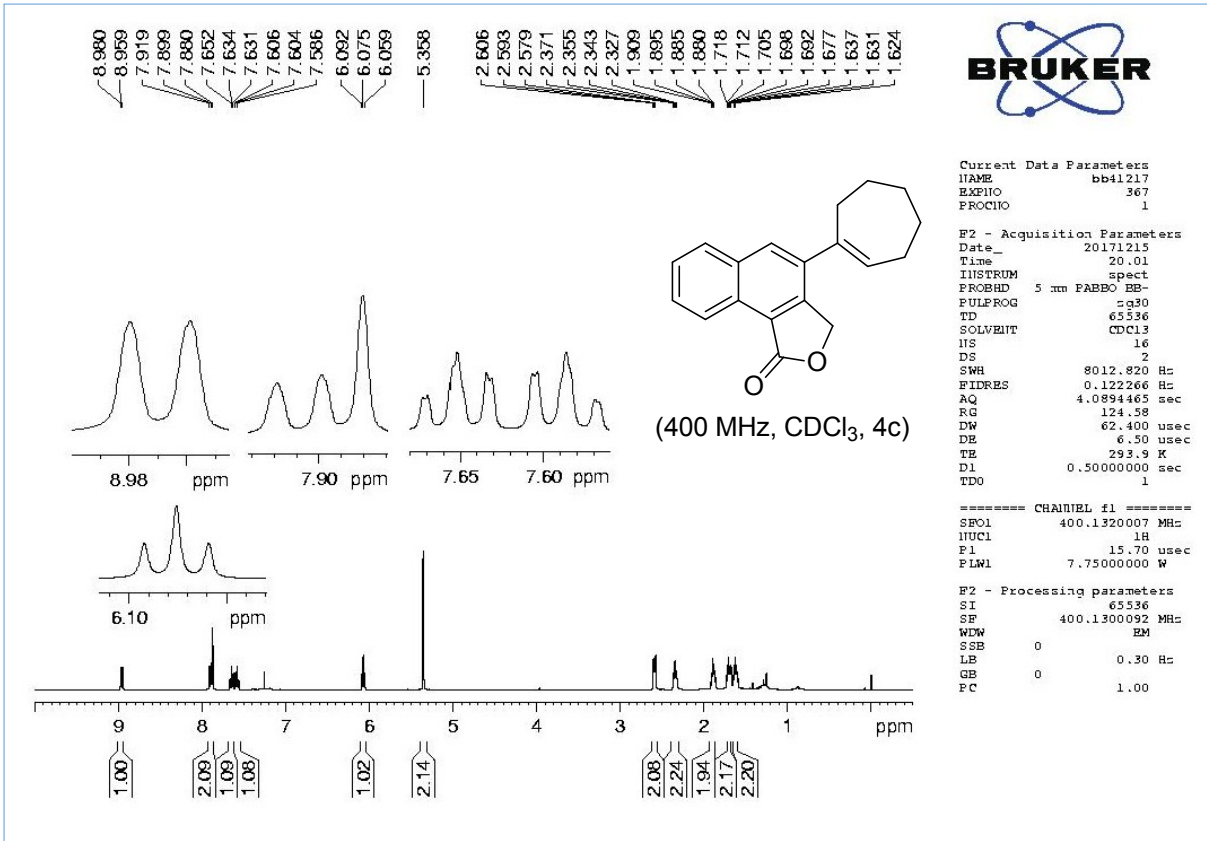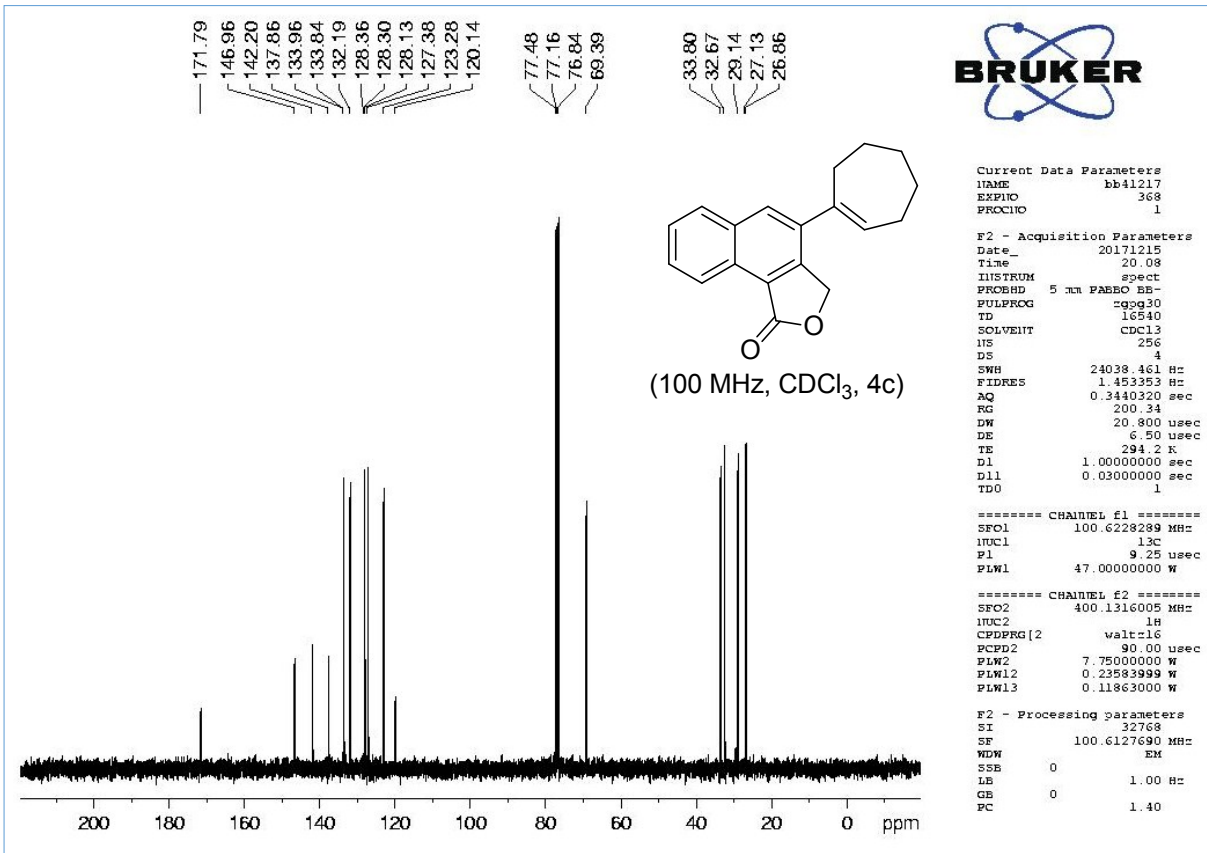

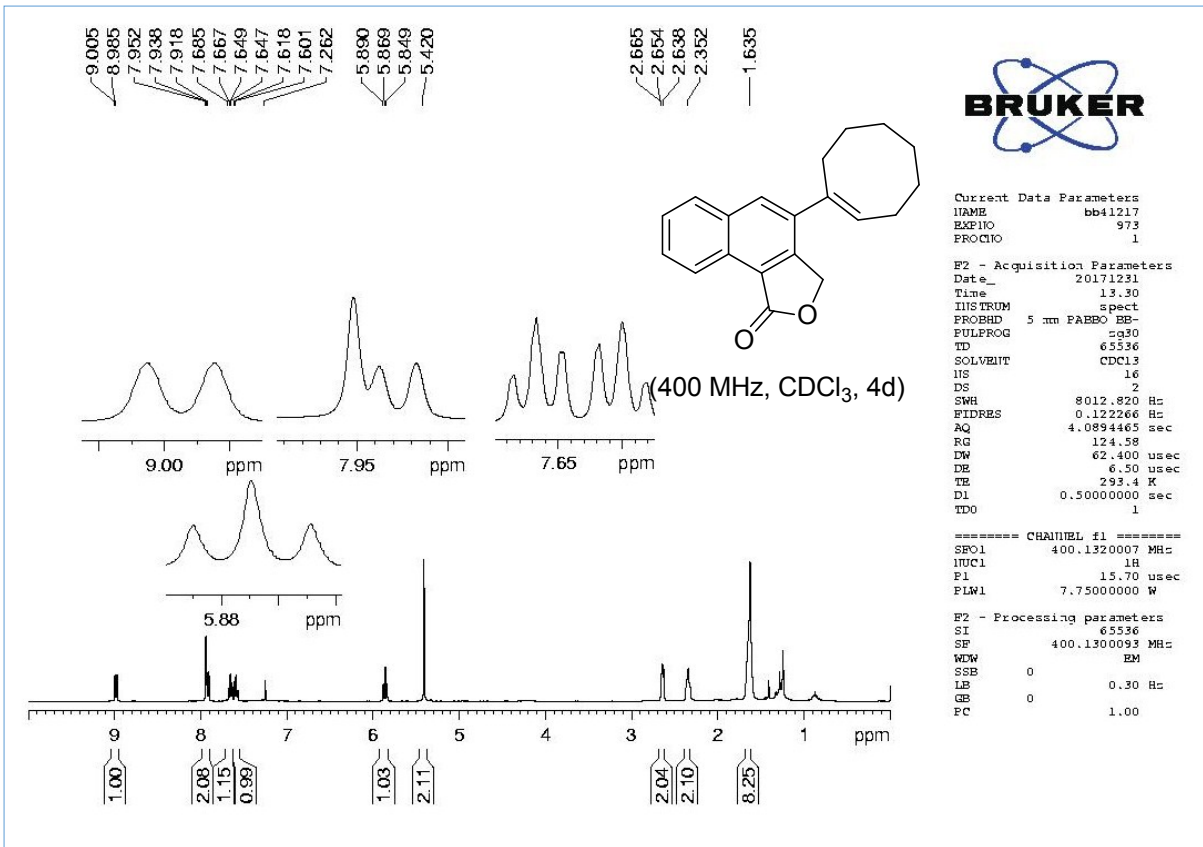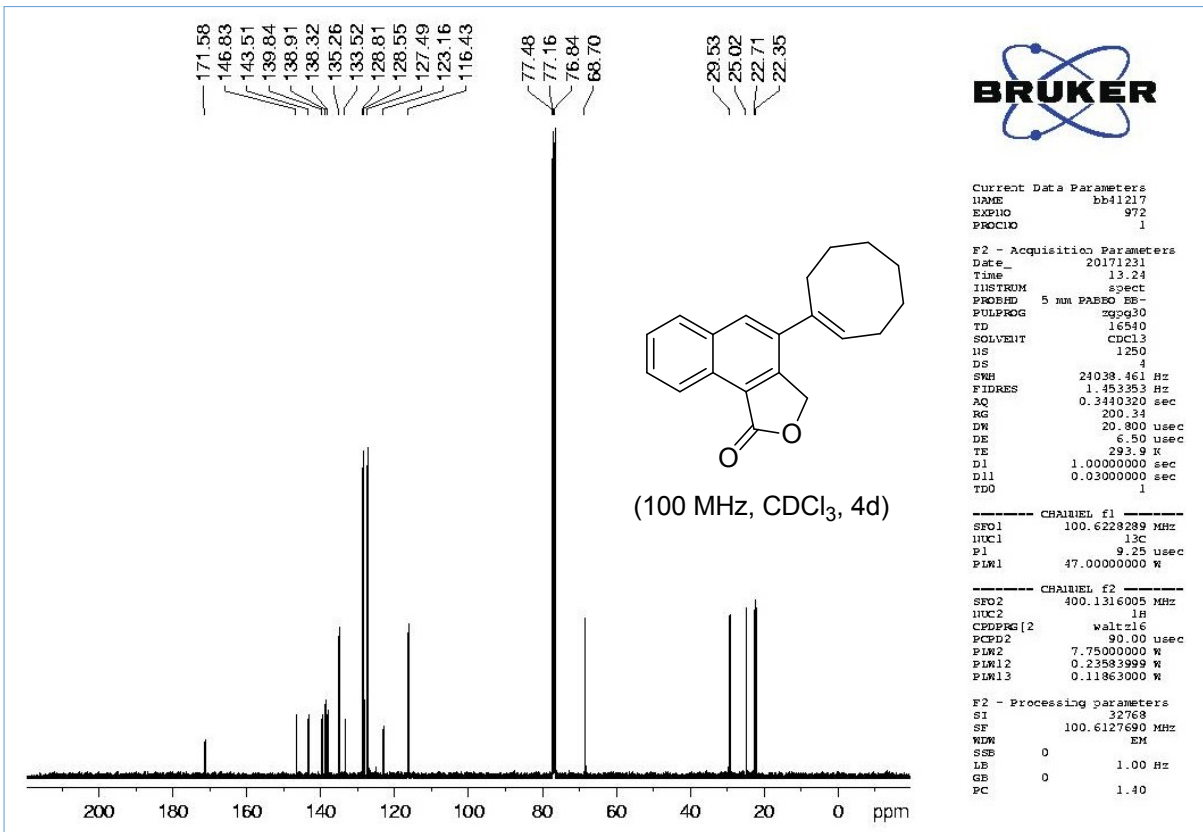

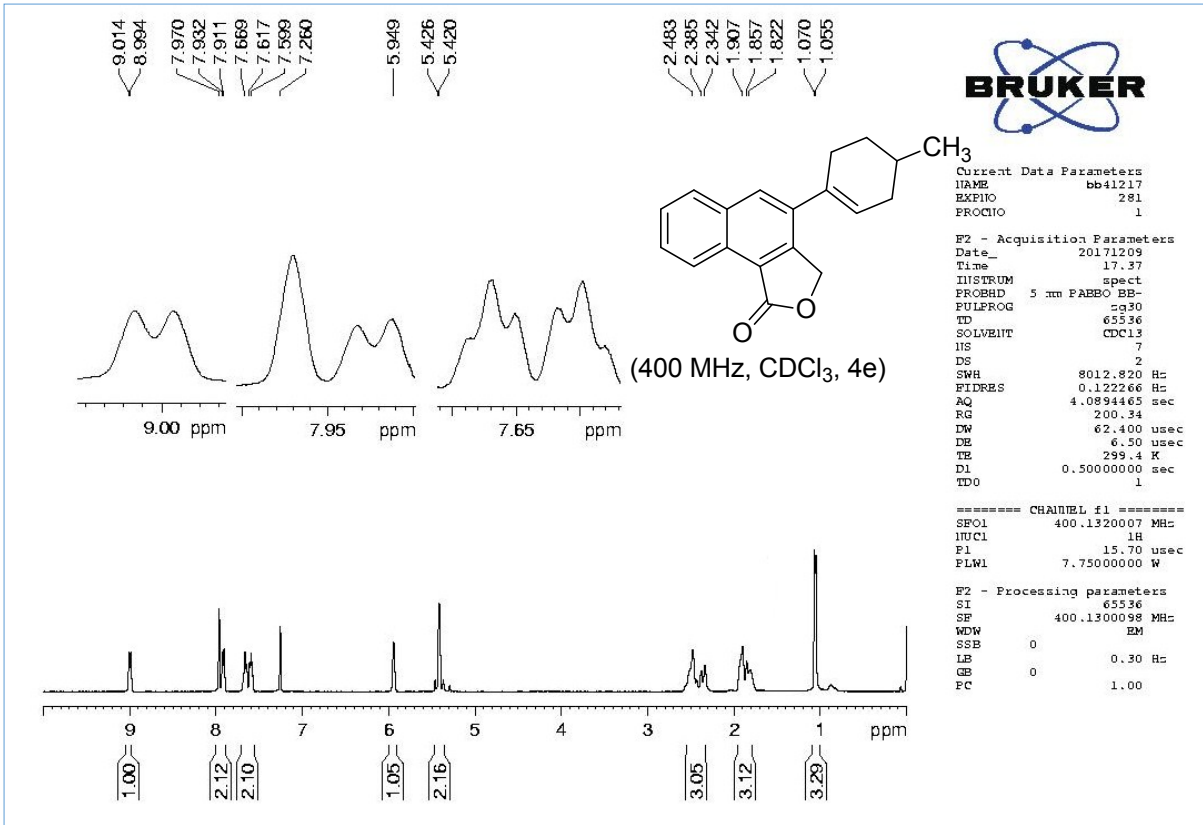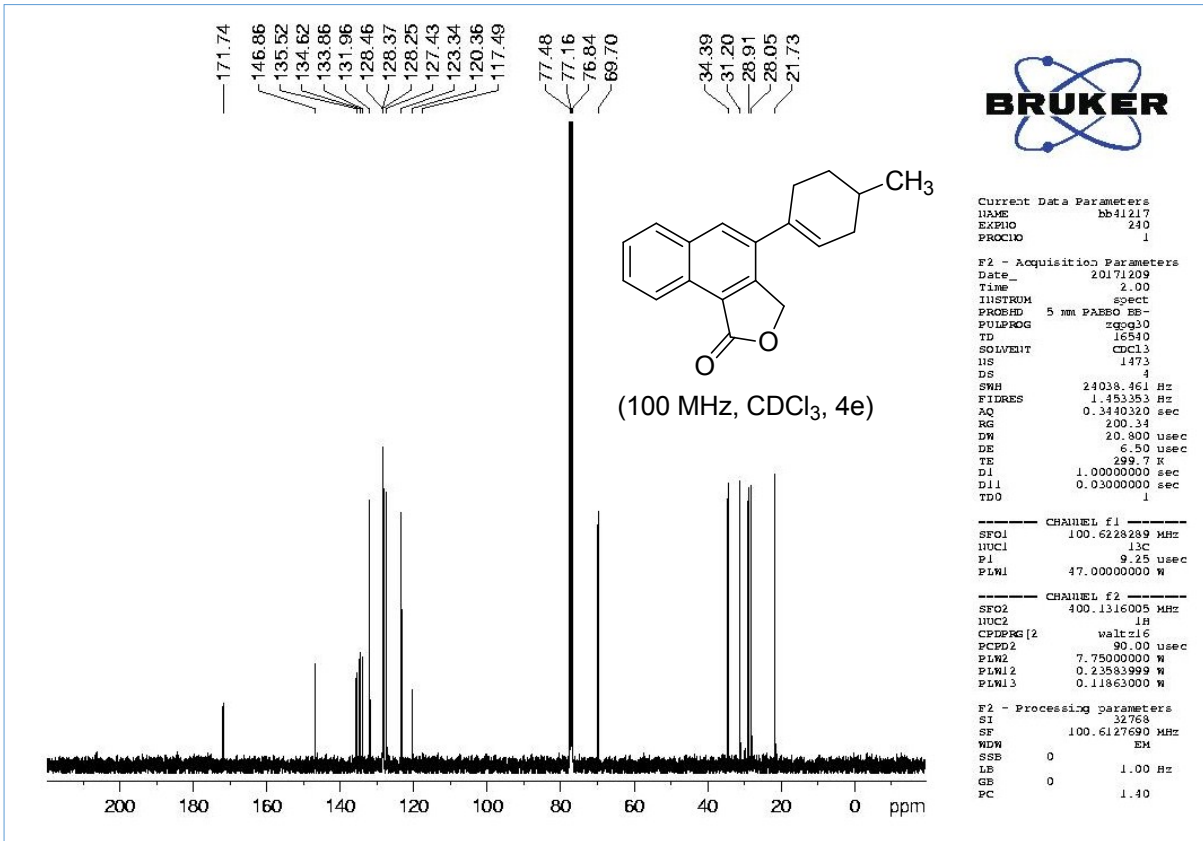

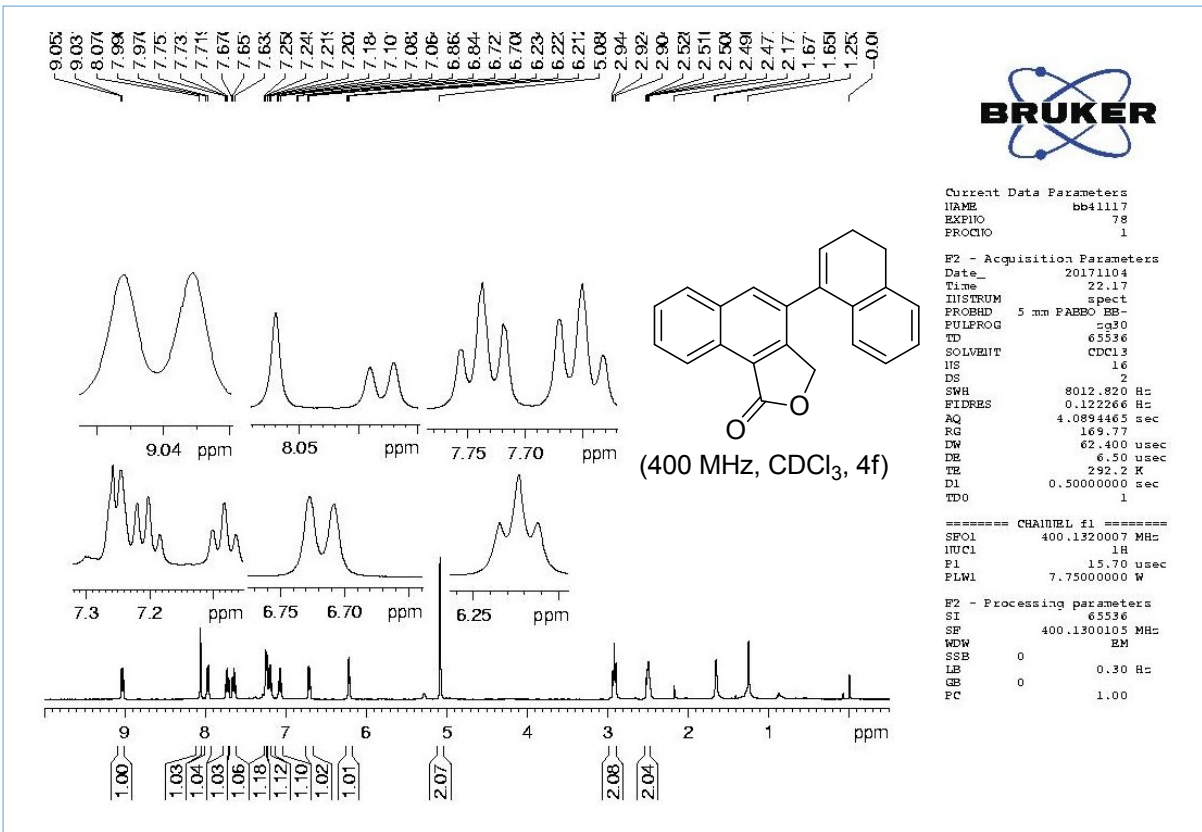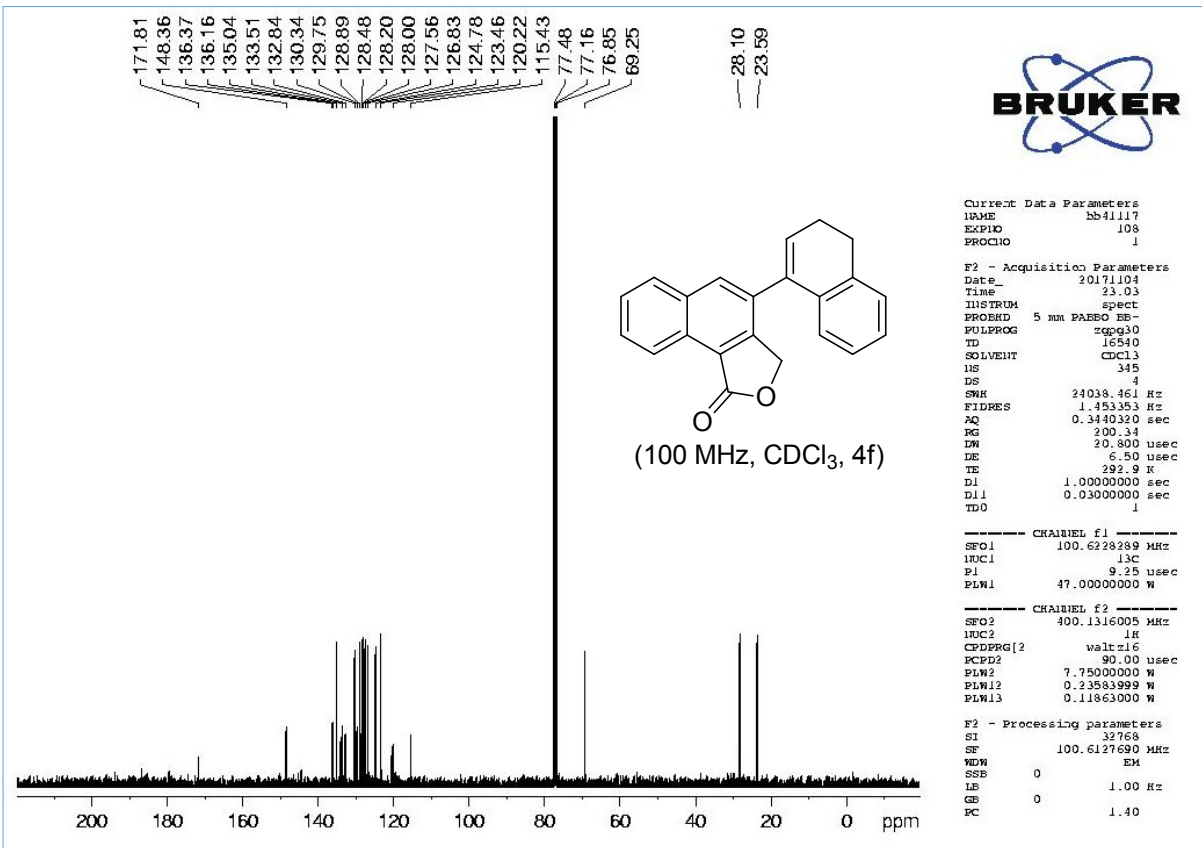

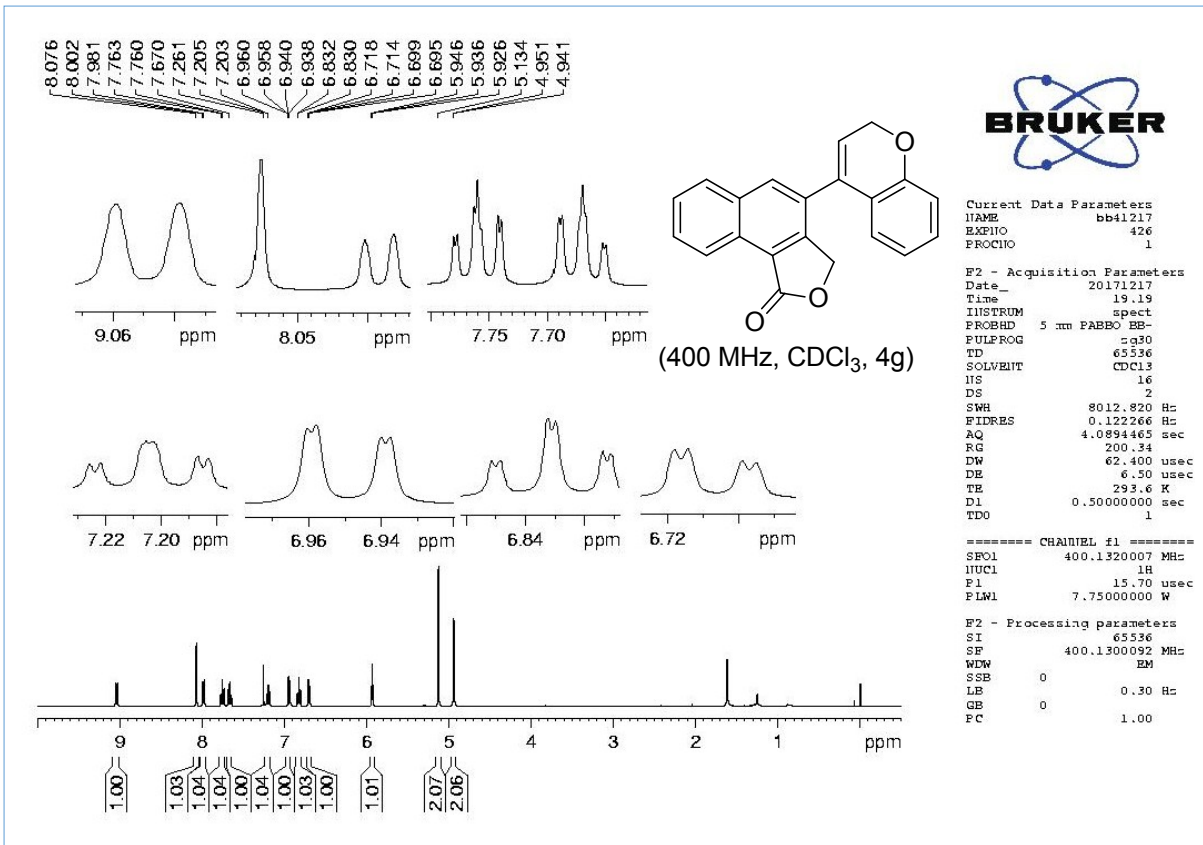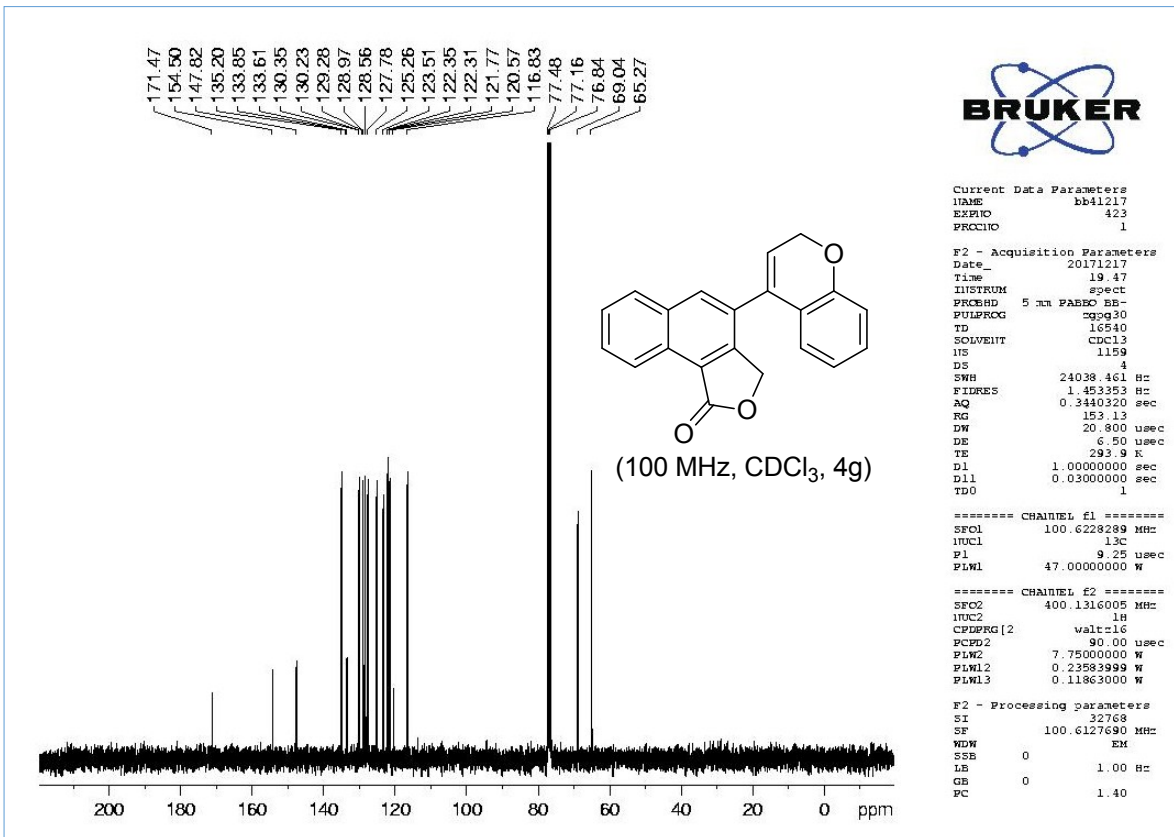



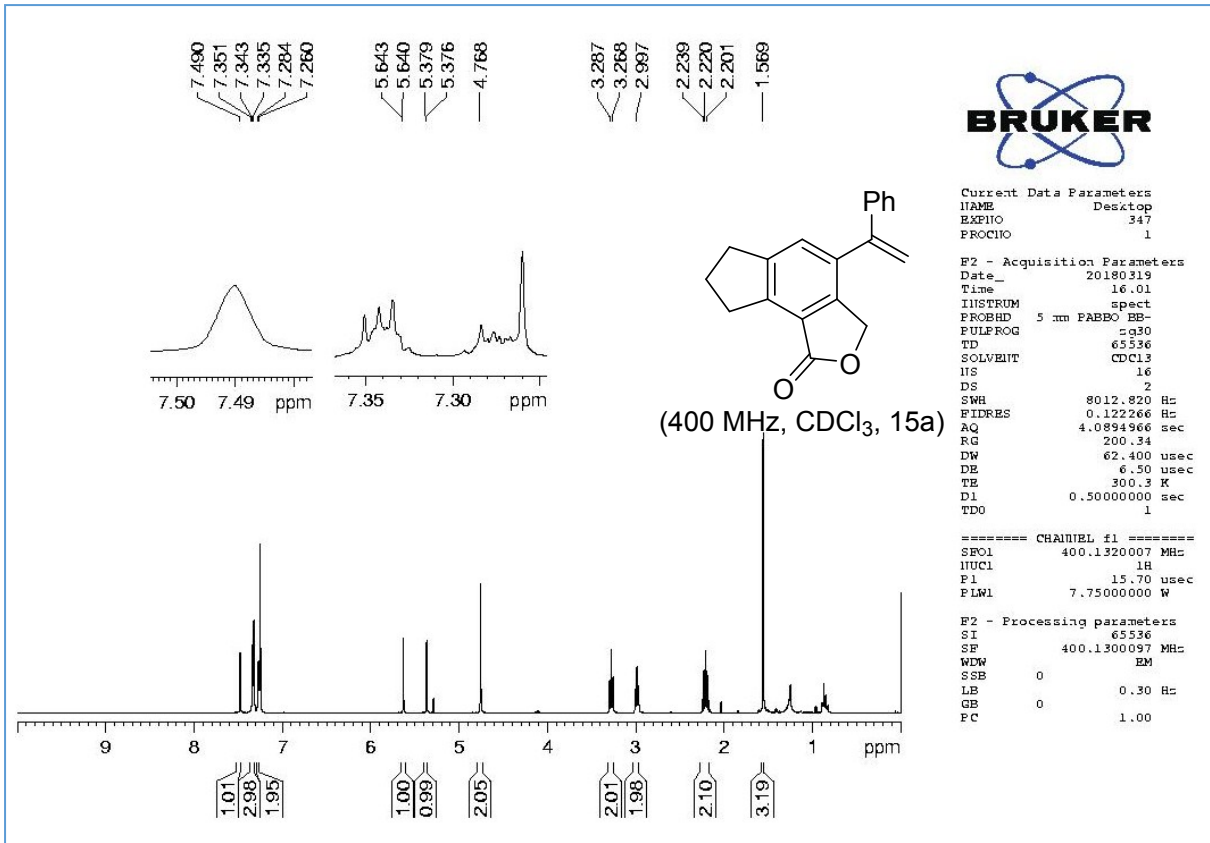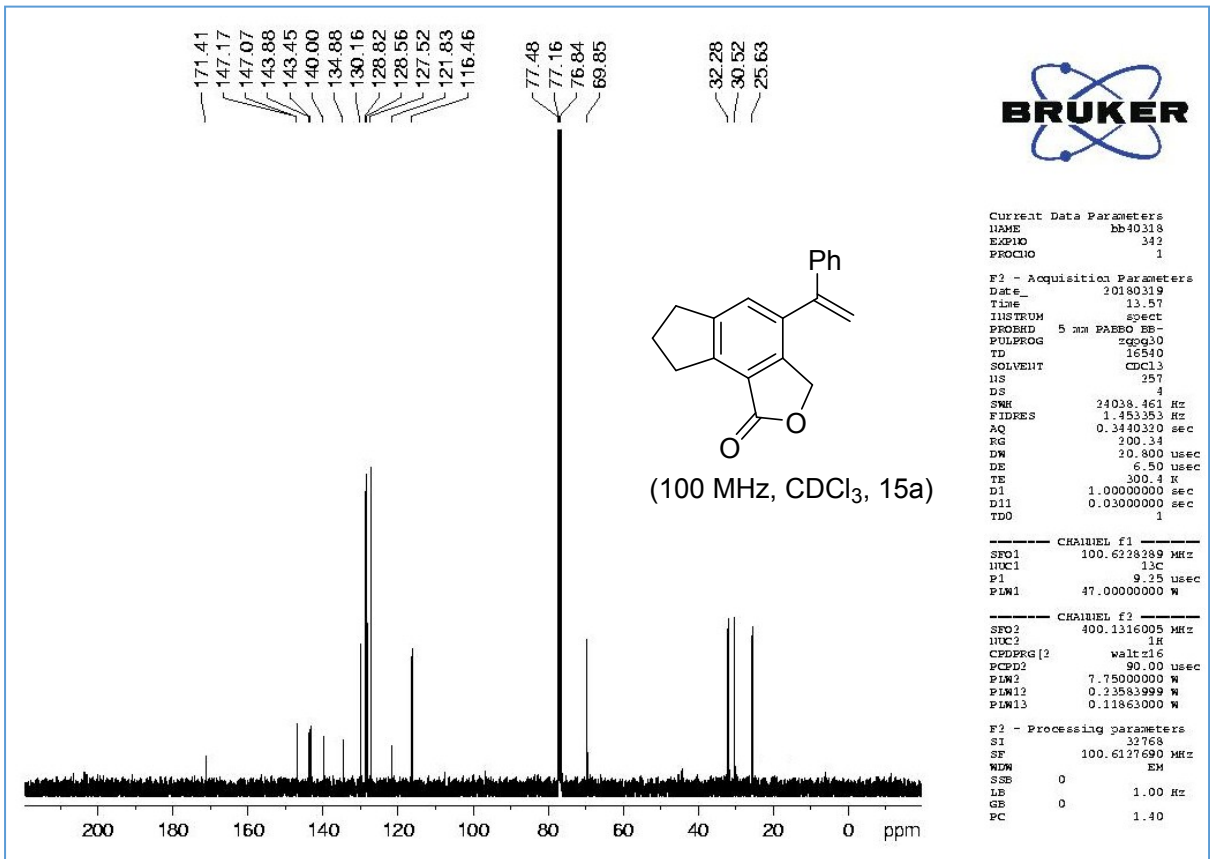

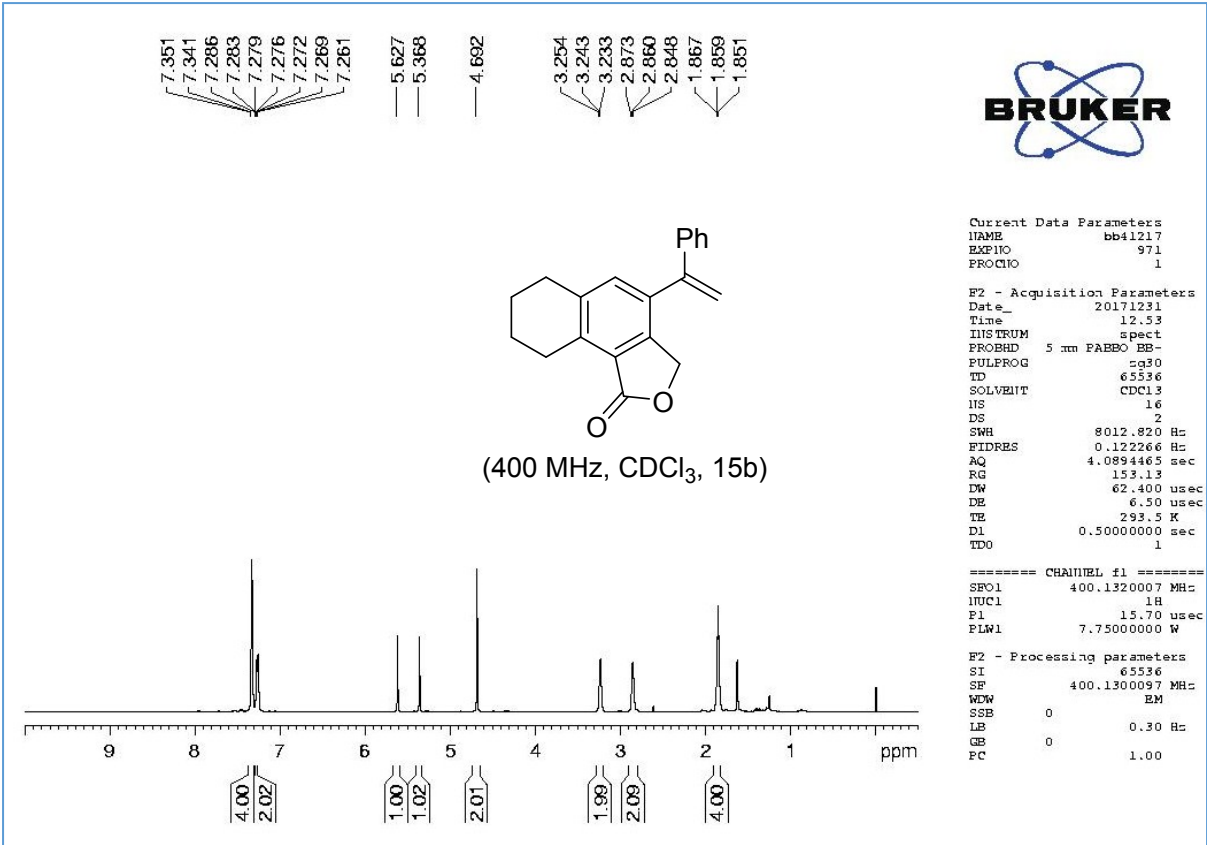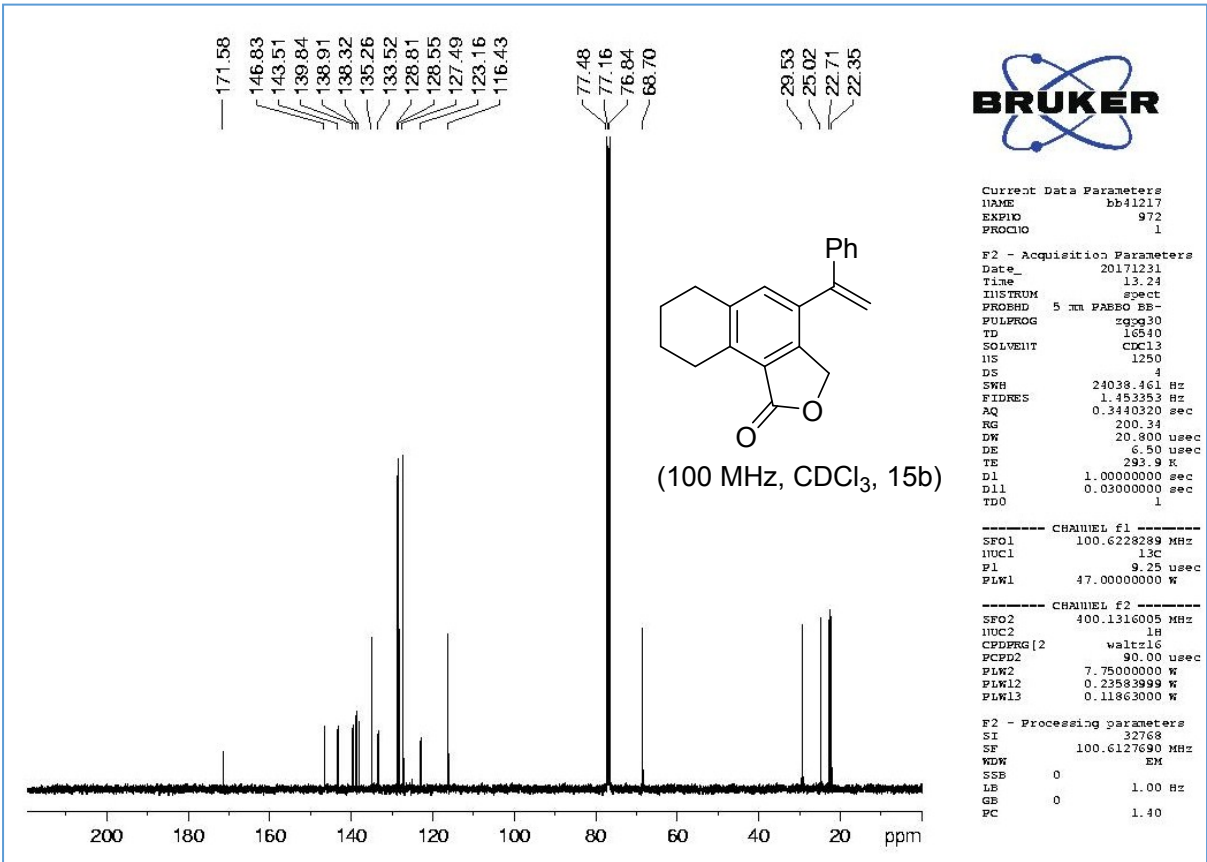

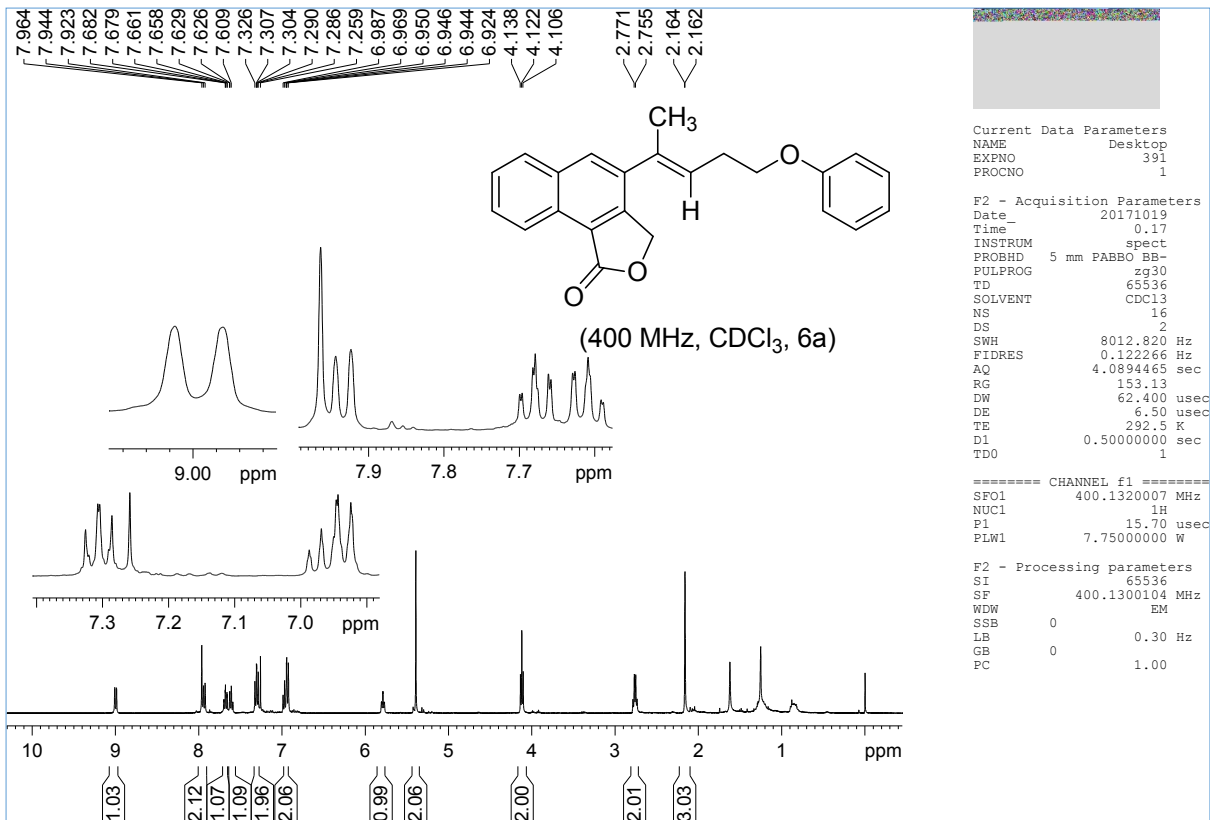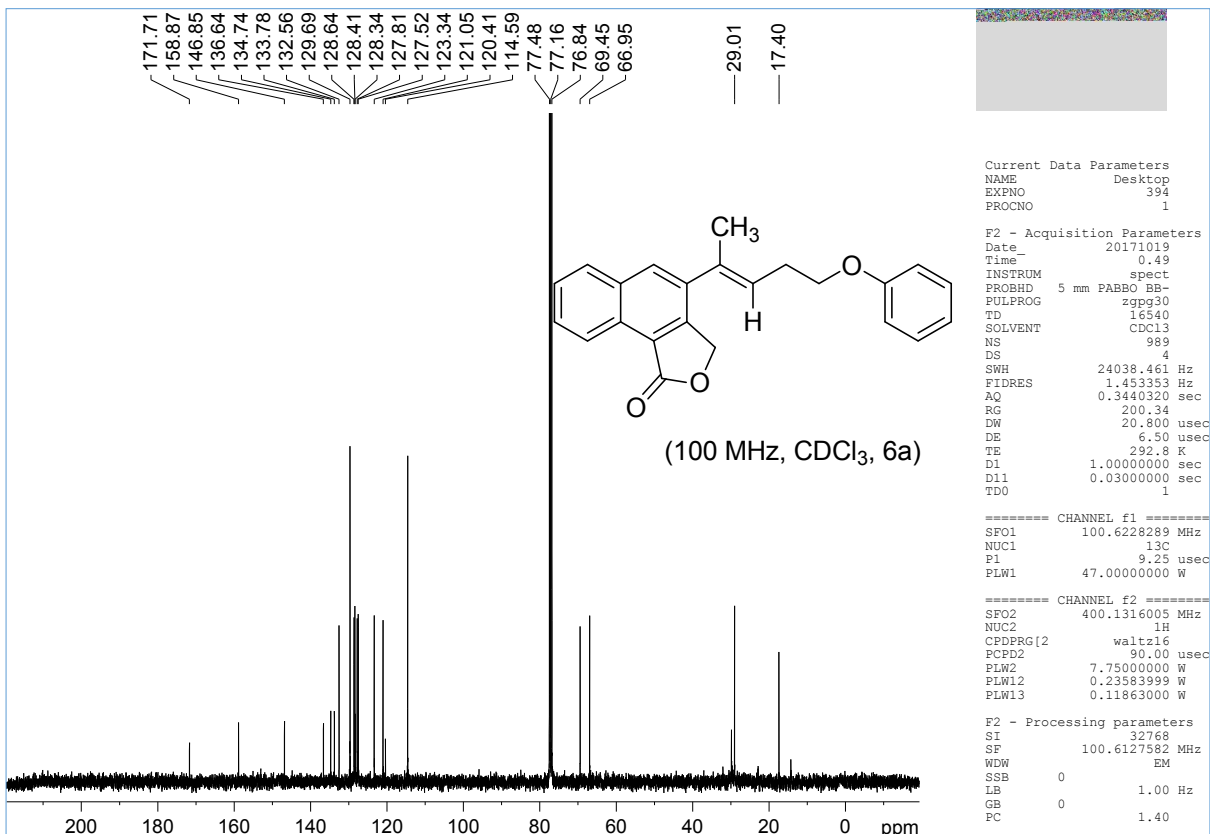



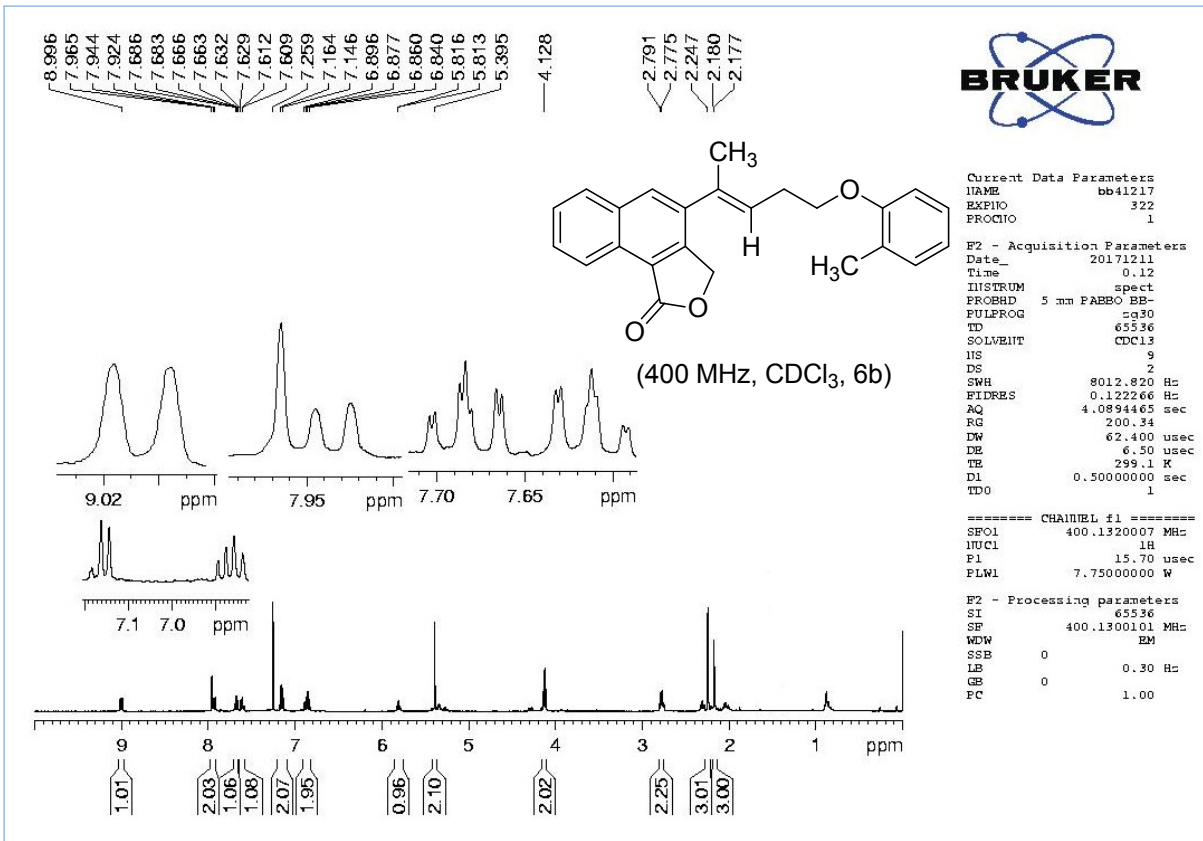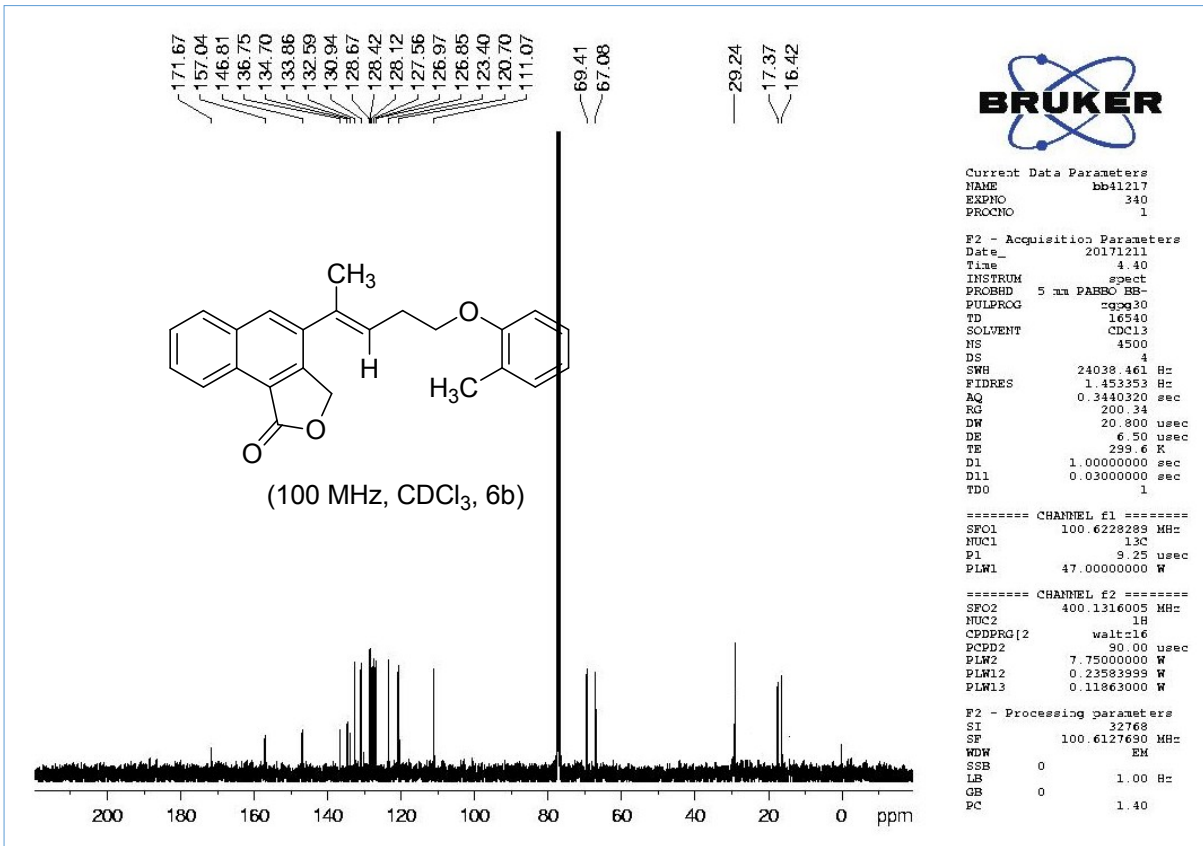

9.012  
8.992  
7.958  
7.941  
7.921  
7.679  
7.625  
7.607  
7.258  
7.105  
7.085  
6.839  
6.819  
— 5.782  
— 5.390  
4.107  
4.092  
4.077  
2.298  
2.156

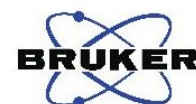

Current Data Parameters  
NAME bb41217  
EXPNO 241  
PROCNO 1

F2 - Acquisition Parameters  
Date\_ 20171209  
Time 1.20  
INSTRUM spect  
PROBHD 5 mm PABBO BB-  
PULPROG zg30  
TD 65336  
SOLVENT CDCl3  
NS 12  
DS 2  
SWH 8012.820 Hz  
FIDRES 0.122266 Hz  
AQ 4.0894465 sec  
RG 200.34  
DW 62.400 usec  
DE 6.50 usec  
TE 299.2 K  
D1 0.50000000 sec  
TDO 1

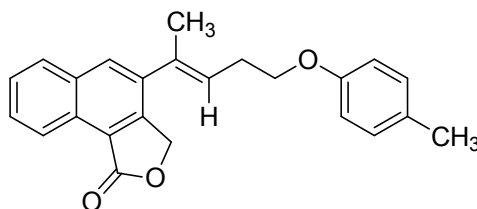

(400 MHz, CDCl<sub>3</sub>, 6c)

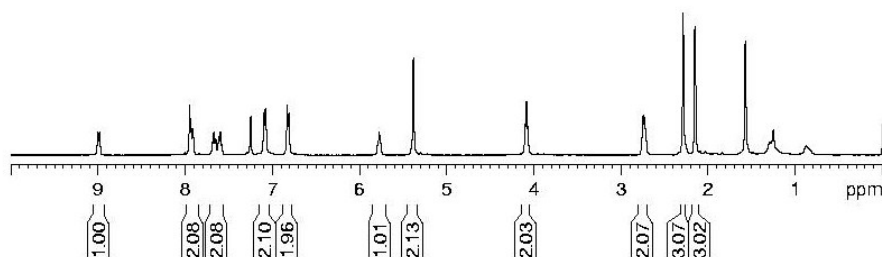

===== CHANNEL f1 =====  
SF01 400.1320007 MHz  
NUC1 1H  
P1 15.70 usec  
PLW1 7.75000000 W

F2 - Processing parameters  
SI 65336  
SF 400.1300105 MHz  
WDW EM  
SSB 0  
LB 0.30 Hz  
GB 0  
PC 1.00

171.69  
156.82  
146.88  
136.73  
134.68  
133.84  
132.56  
131.86  
130.35  
130.14  
128.65  
128.41  
127.95  
127.53  
123.40  
120.47  
114.54  
77.48  
77.16  
76.84  
69.45  
67.20  
29.09  
20.61  
17.40

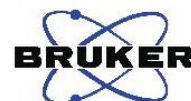

Current Data Parameters  
NAME bb41217  
EXPNO 242  
PROCNO 1

F2 - Acquisition Parameters  
Date\_ 20171209  
Time 2.27  
INSTRUM spect  
PROBHD 5 mm PABBO BB-  
PULPROG zgpg30  
TD 16540  
SOLVENT CDCl3  
NS 3000  
DS 4  
SWH 24038.461 Hz  
FIDRES 1.453253 Hz  
AQ 0.3440320 sec  
RG 200.34  
DW 20.800 usec  
DE 6.50 usec  
TE 299.7 K  
D1 1.00000000 sec  
D11 0.03000000 sec  
TDO 1

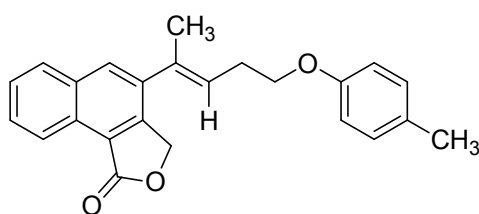

(100 MHz, CDCl<sub>3</sub>, 6c)

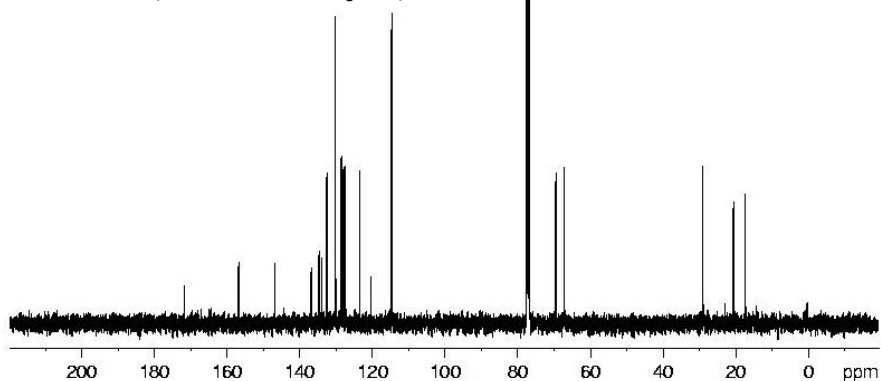

===== CHANNEL f1 =====  
SF01 100.6228289 MHz  
NUC1 13C  
P1 9.25 usec  
PLW1 47.00000000 W

===== CHANNEL f2 =====  
SF02 400.1316005 MHz  
NUC2 1H  
PCPD2 wait=16  
PCPD2 90.00 usec  
PLW2 7.75000000 W  
PLW12 0.23583999 W  
PLW13 0.11863000 W

F2 - Processing parameters  
SI 32768  
SF 100.6127690 MHz  
WDW EM  
SSB 0  
LB 1.00 Hz  
GB 0  
PC 1.40

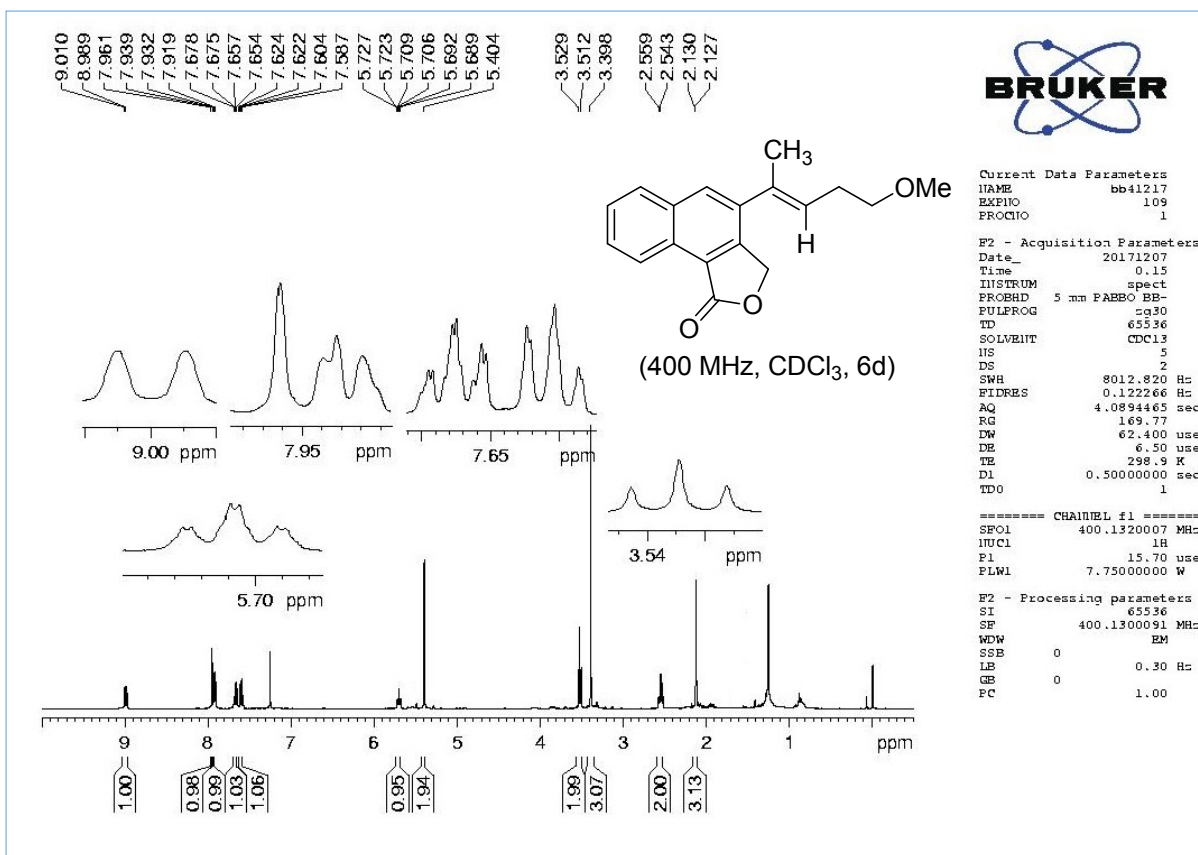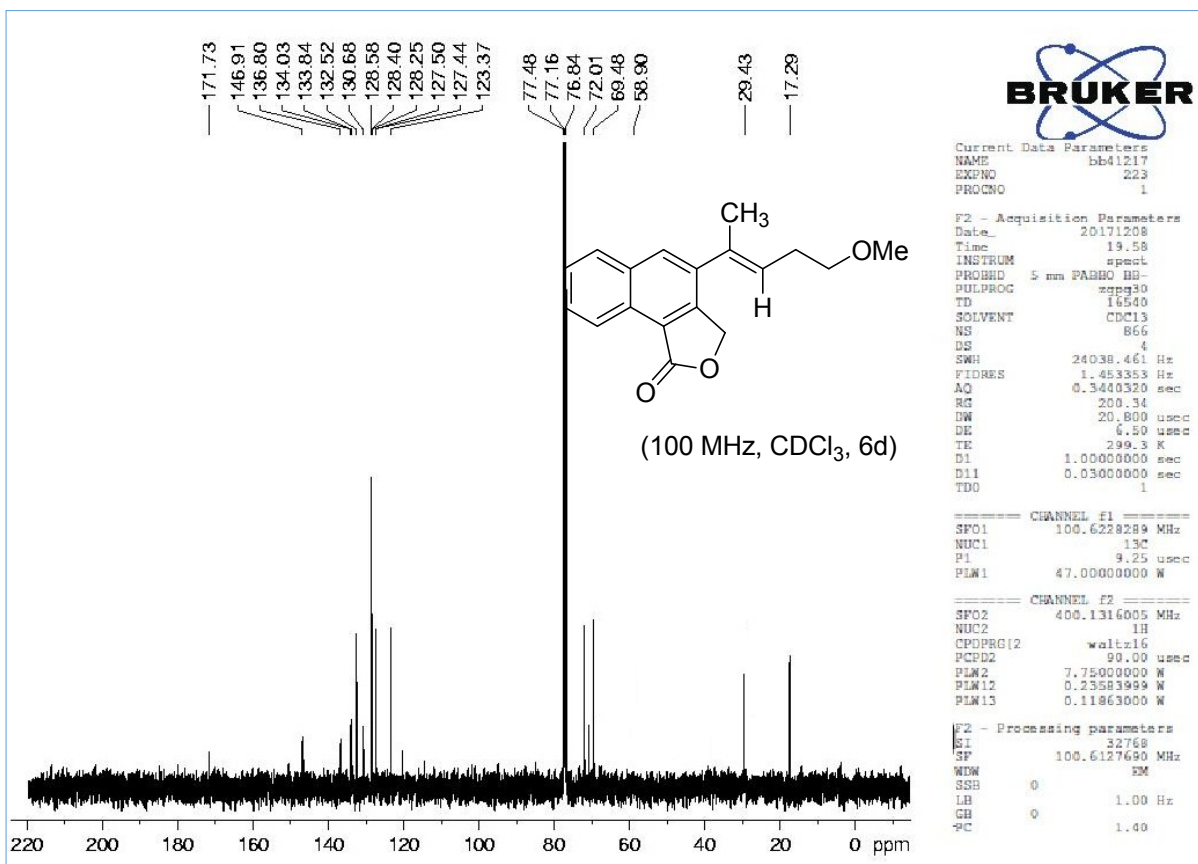

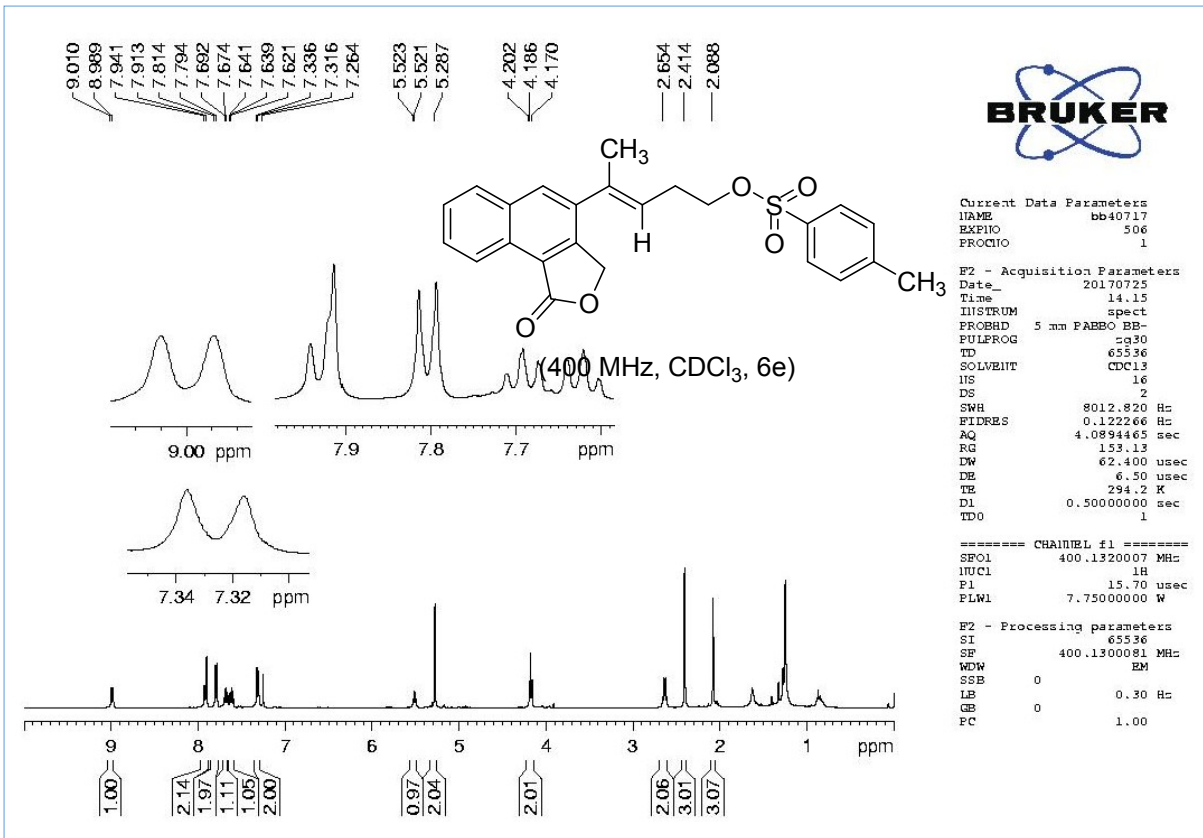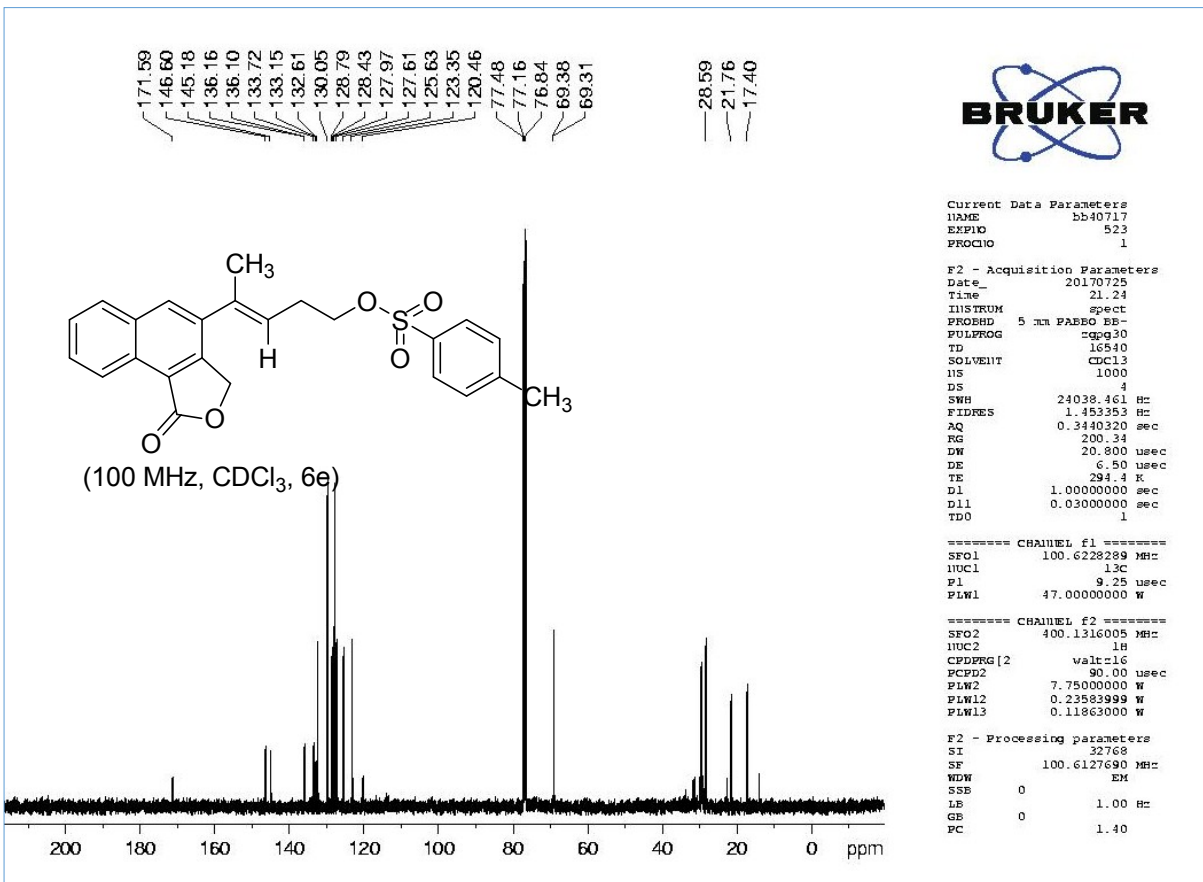

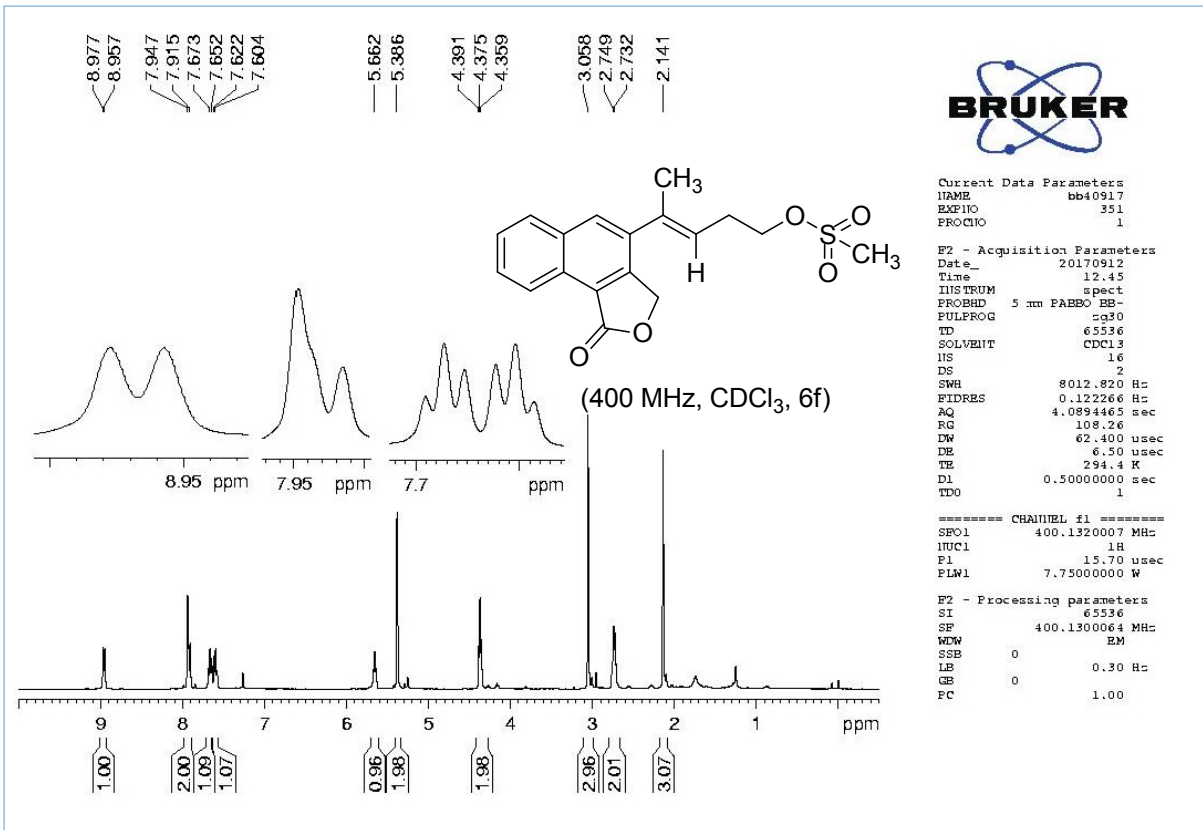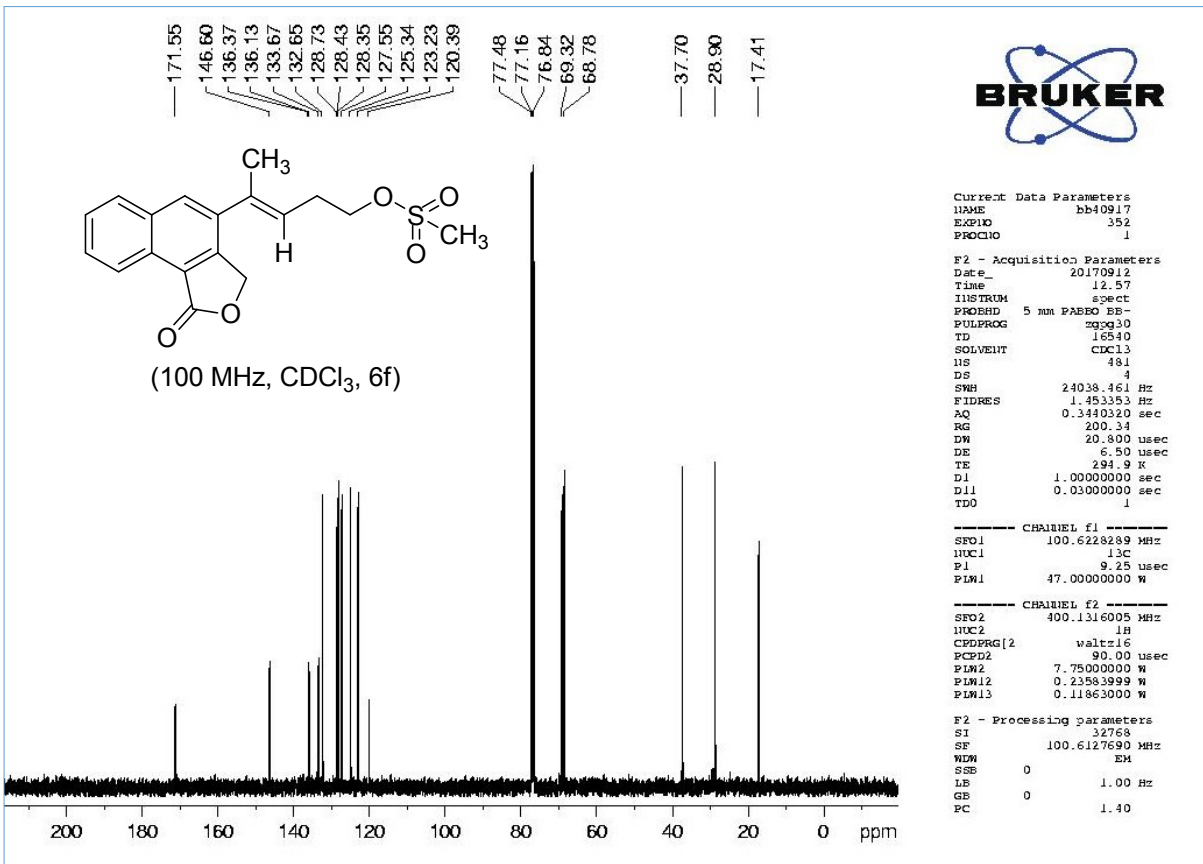



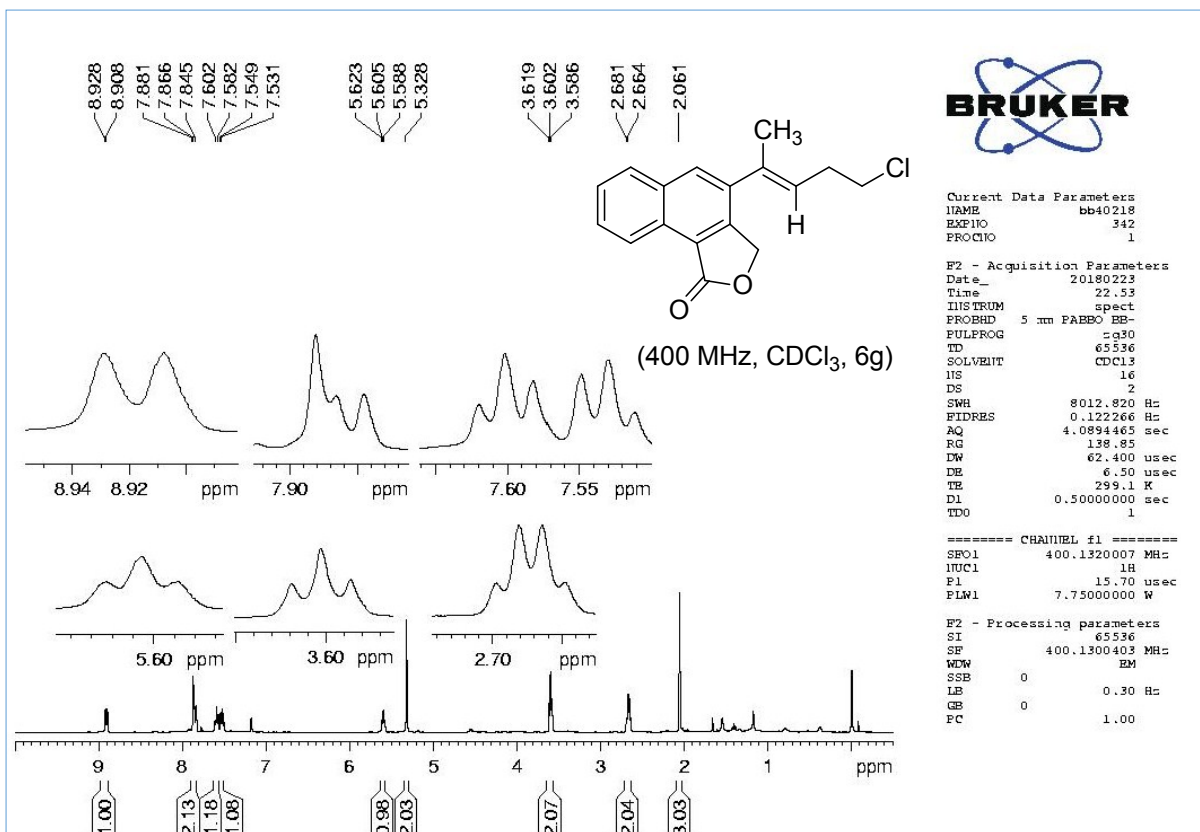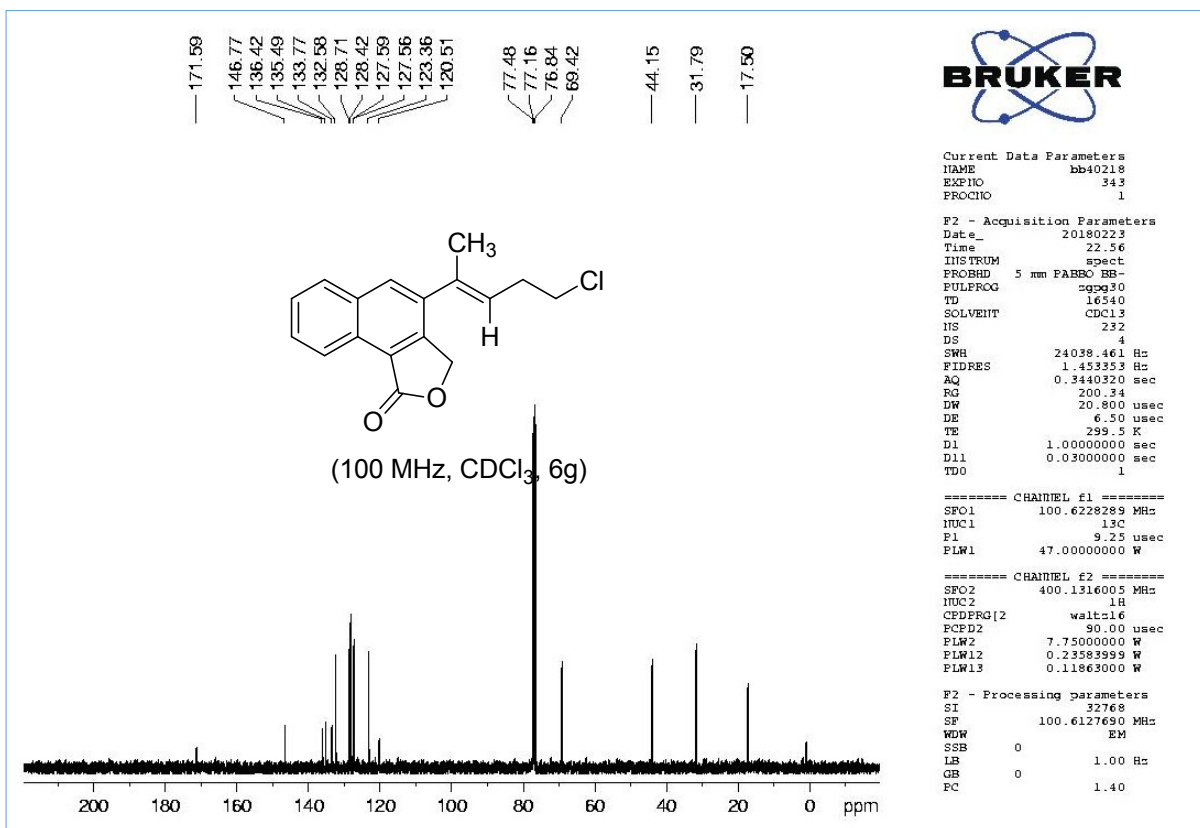

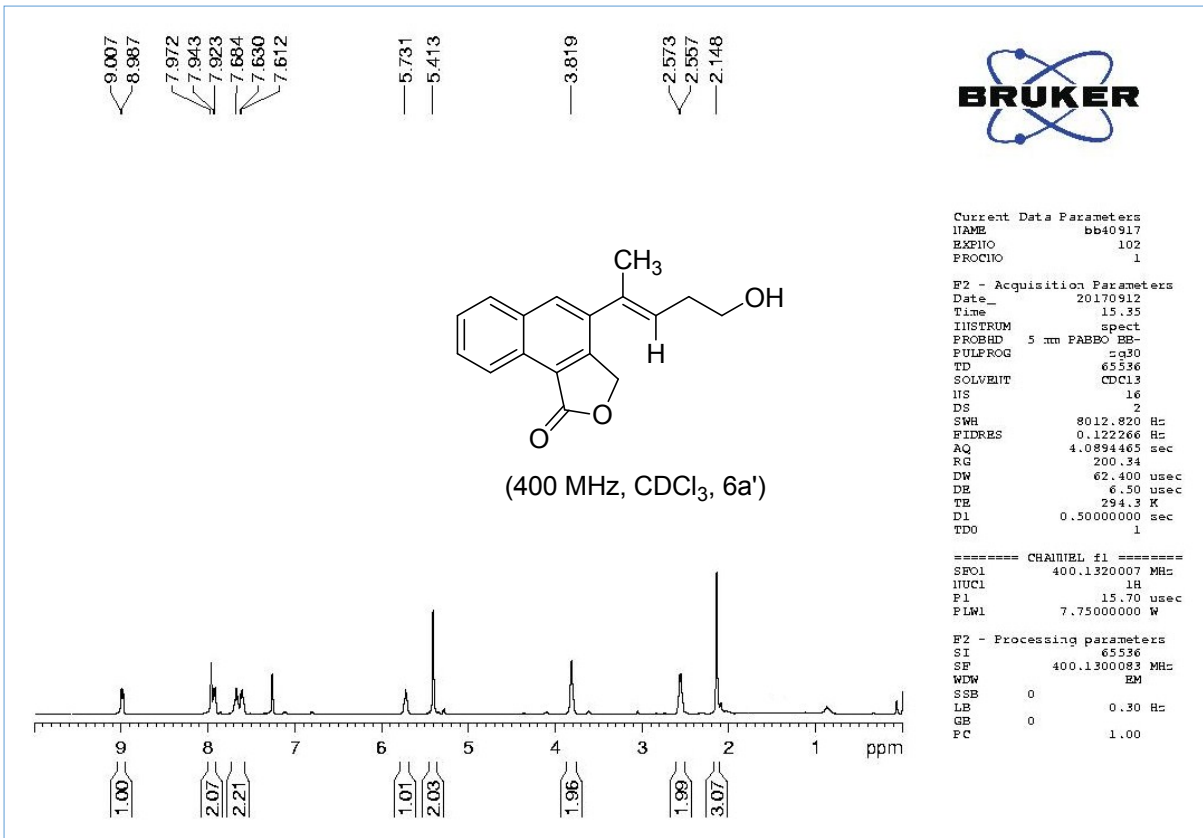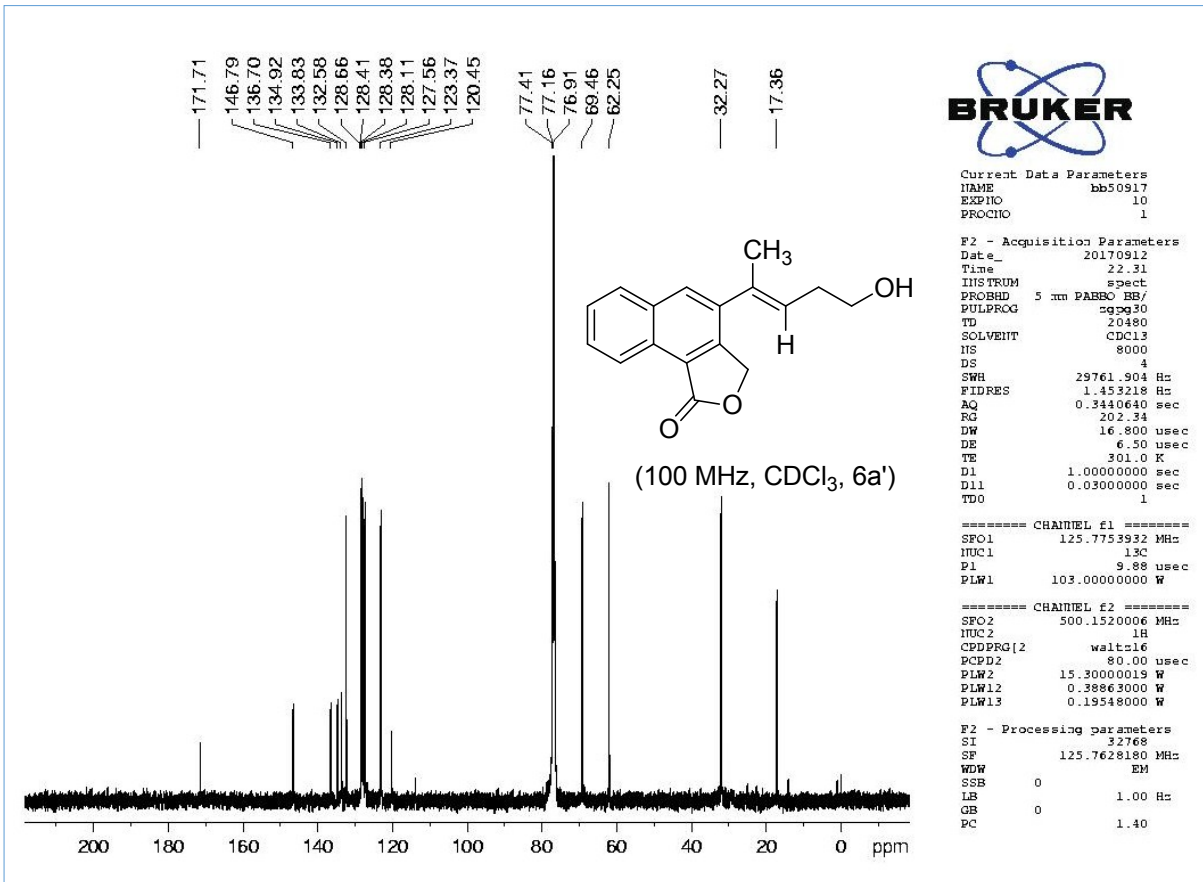

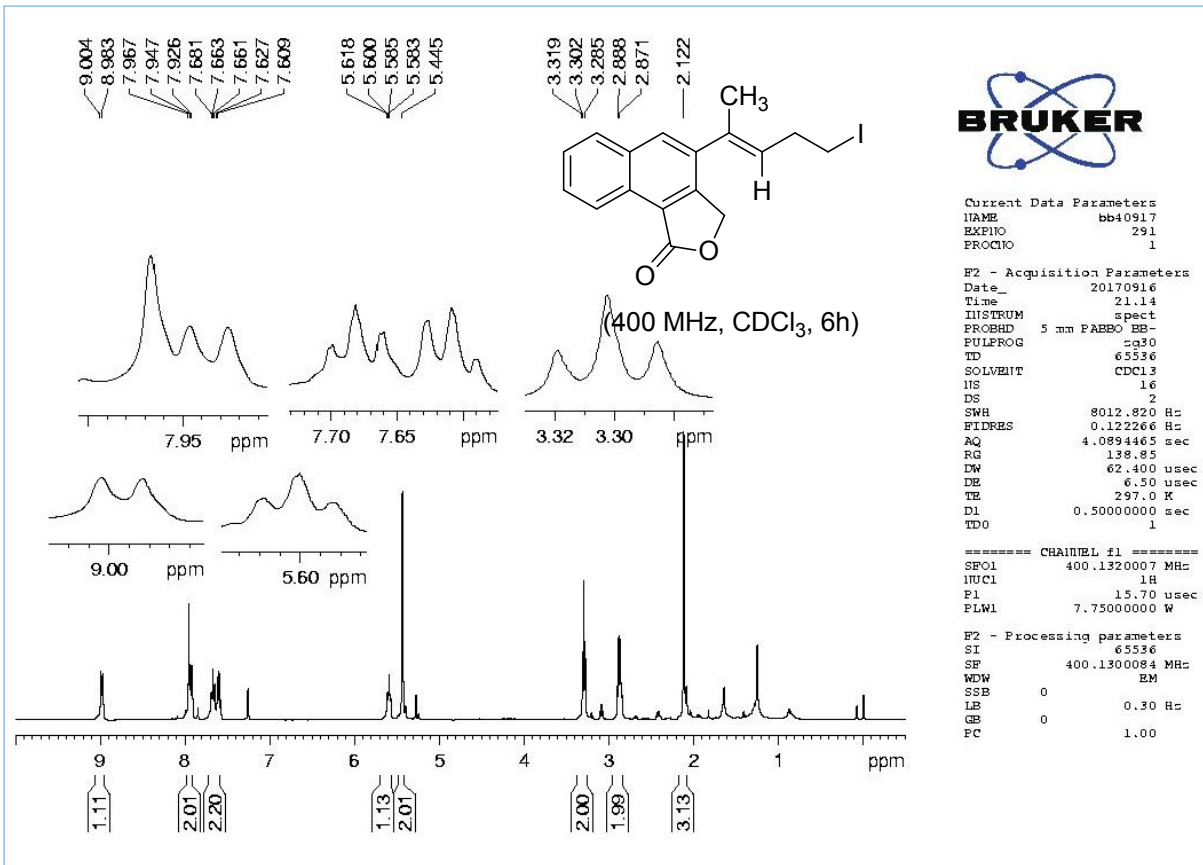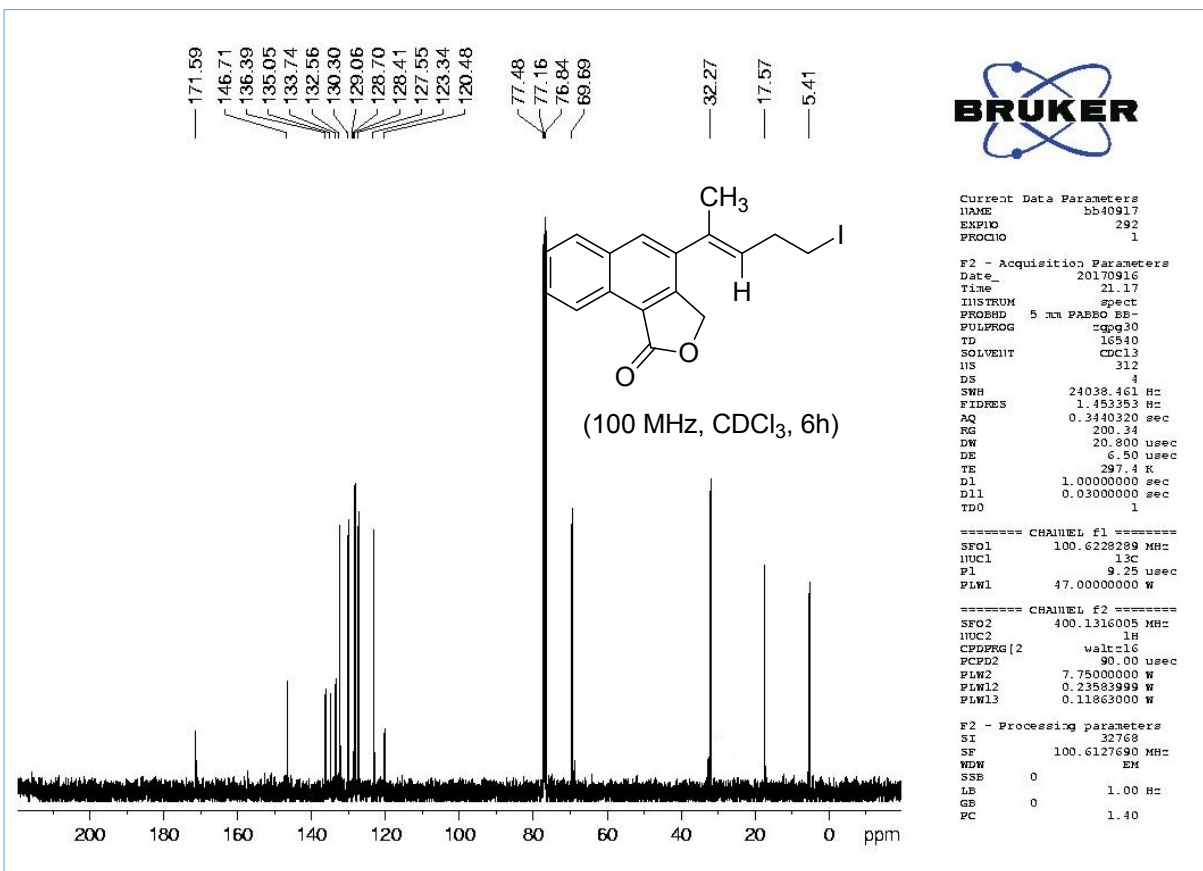



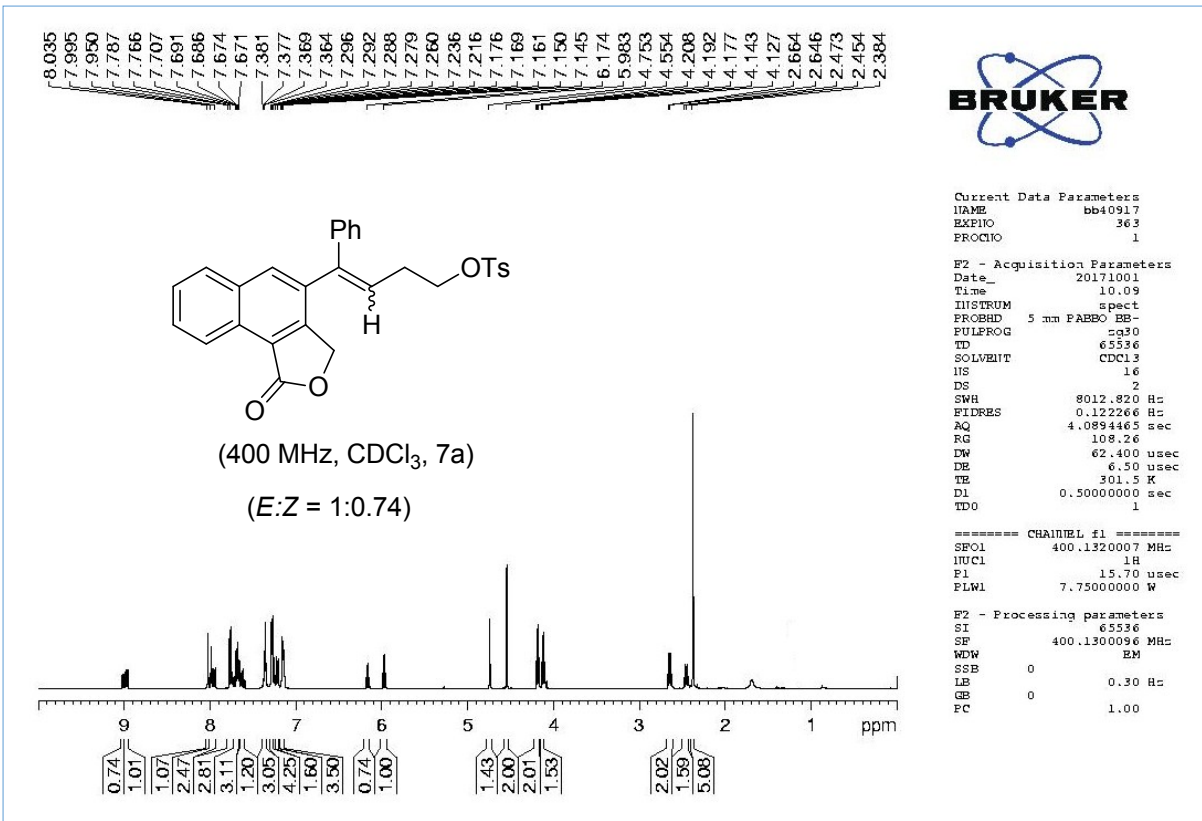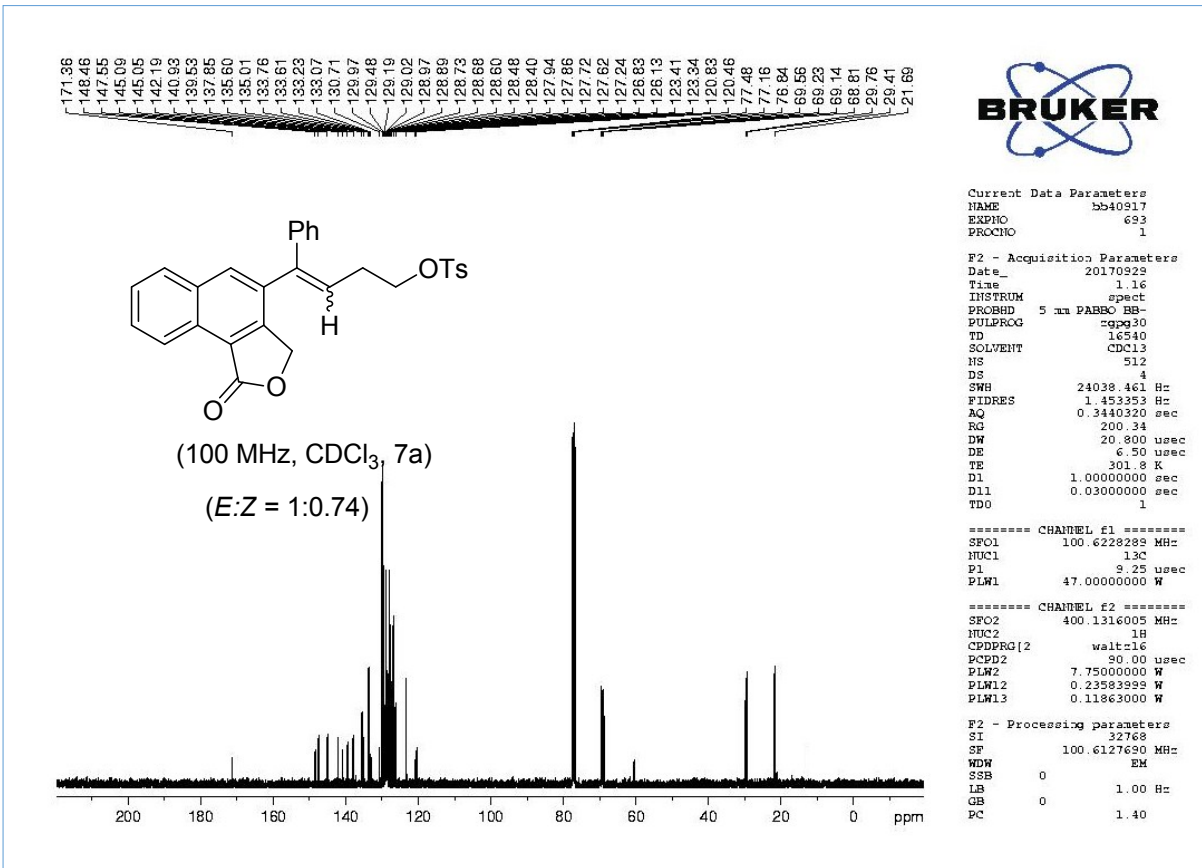

9.020  
8.997  
8.976  
8.124  
8.054  
8.041  
8.021  
7.998  
7.978  
7.758  
7.701  
7.682  
7.652  
7.632  
7.431  
7.418  
7.400  
7.386  
7.312  
7.304  
7.297  
7.260  
7.232  
7.216  
6.302  
6.117  
4.821  
4.605  
4.390  
4.374  
4.358  
4.336  
4.321  
3.017  
2.986  
2.801  
2.785  
2.768  
2.608  
2.580

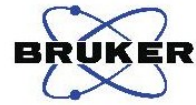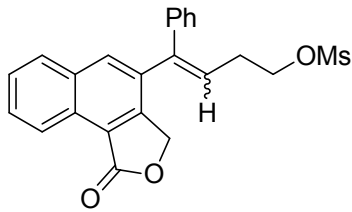

(400 MHz, CDCl<sub>3</sub>, 7b)  
(E:Z = 1:0.7)

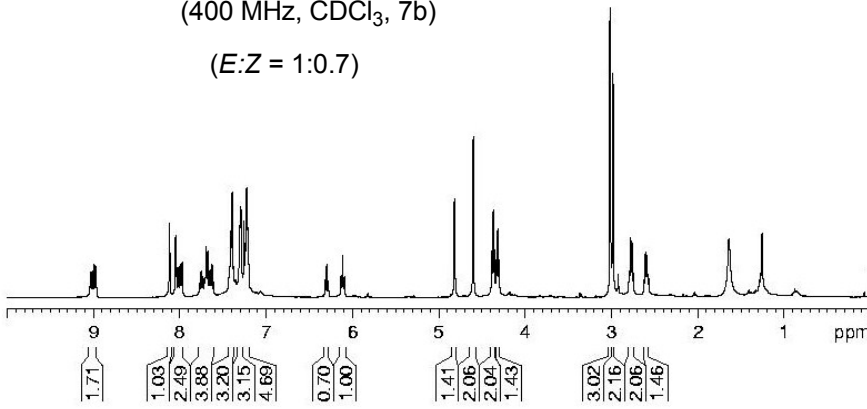

```
Current Data Parameters
NAME      bb40917
EXPNO     753
PROCNO    1

F2 - Acquisition Parameters
Date_     20171001
Time      10.32
INSTRUM   spect
PROBHD    5 mm PABBO BB-
PULPROG   zg30
TD         65536
SOLVENT   CDCl3
NS         16
DS         2
SWH        8012.820 Hz
FIDRES     0.122266 Hz
AQ         4.0894465 sec
RG         153.13
DW         62.400 usec
DE         6.50 usec
TE         301.1 K
D1         0.50000000 sec
TDO        1

===== CHANNEL f1 =====
SFO1      400.1320007 MHz
NUC1      1H
P1        15.70 usec
PLW1      7.75000000 W

F2 - Processing parameters
SI         65536
SF         400.1300093 MHz
WDW        EM
SSB        0
LB         0.30 Hz
GB         0
FC         1.00
```

171.39  
148.46  
147.59  
142.57  
141.24  
139.57  
137.89  
135.58  
133.00  
133.86  
133.67  
130.76  
129.52  
129.29  
129.13  
129.05  
128.99  
128.87  
128.82  
128.67  
128.63  
128.52  
128.52  
127.82  
127.67  
126.94  
125.90  
123.49  
123.39  
120.96  
120.56  
77.48  
77.16  
76.84  
68.92  
68.87  
37.79  
37.71  
30.13  
29.74

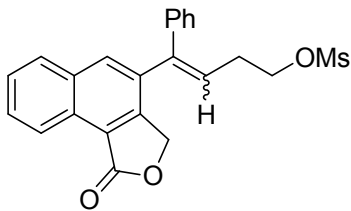

(100 MHz, CDCl<sub>3</sub>, 7b)  
(E:Z = 1:0.7)

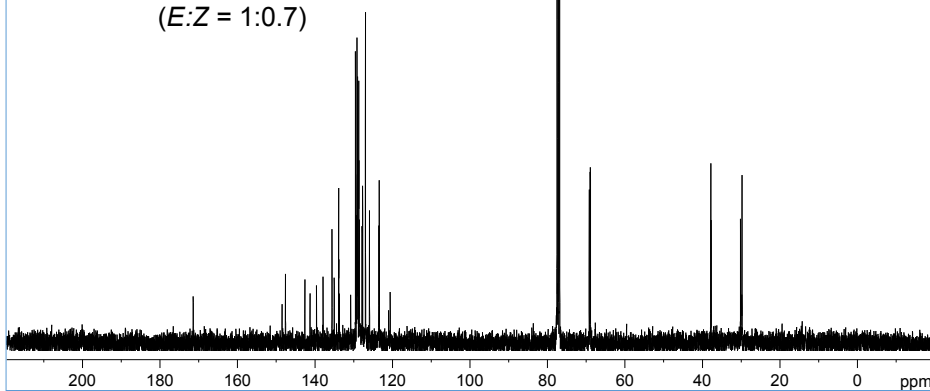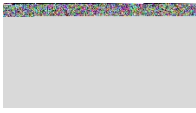

```
Current Data Parameters
NAME      Desktop
EXPNO     754
PROCNO    1

F2 - Acquisition Parameters
Date_     20171001
Time      10.36
INSTRUM   spect
PROBHD    5 mm PABBO BB-
PULPROG   zgpg30
TD         16540
SOLVENT   CDCl3
NS         1500
DS         4
SWH        24038.461 Hz
FIDRES     1.453353 Hz
AQ         0.3440320 sec
RG         200.34
DW         20.800 usec
DE         6.50 usec
TE         301.7 K
D1         1.00000000 sec
D11        0.03000000 sec
TDO        1

===== CHANNEL f1 =====
SFO1      100.6228289 MHz
NUC1      13C
P1         9.25 usec
PLW1      47.00000000 W

===== CHANNEL f2 =====
SFO2      400.1316005 MHz
NUC2      1H
CPDPRG[2] waltz16
PCPD2     90.00 usec
PLW2      7.75000000 W
PLW12     0.23583999 W
PLW13     0.11863000 W

F2 - Processing parameters
SI         32768
SF         100.6127557 MHz
WDW        EM
SSB        0
LB         1.00 Hz
GB         0
FC         1.40
```

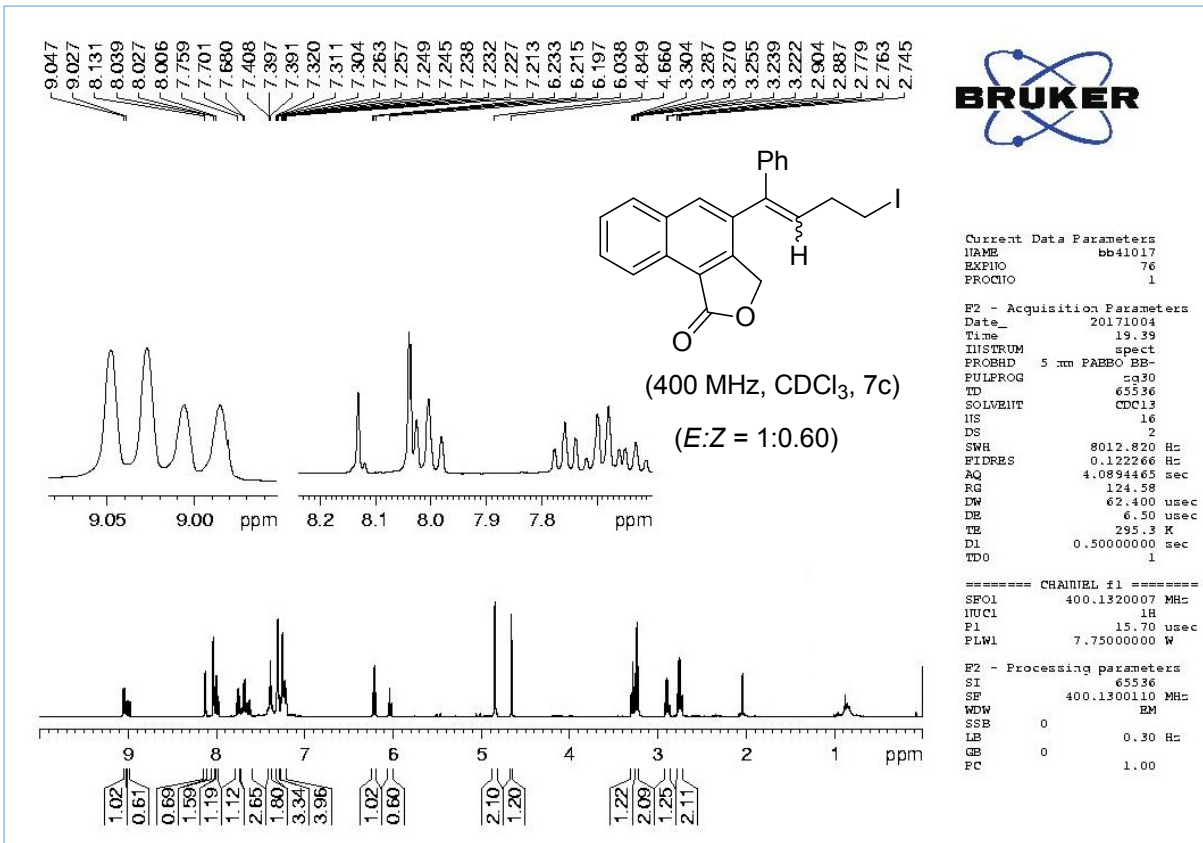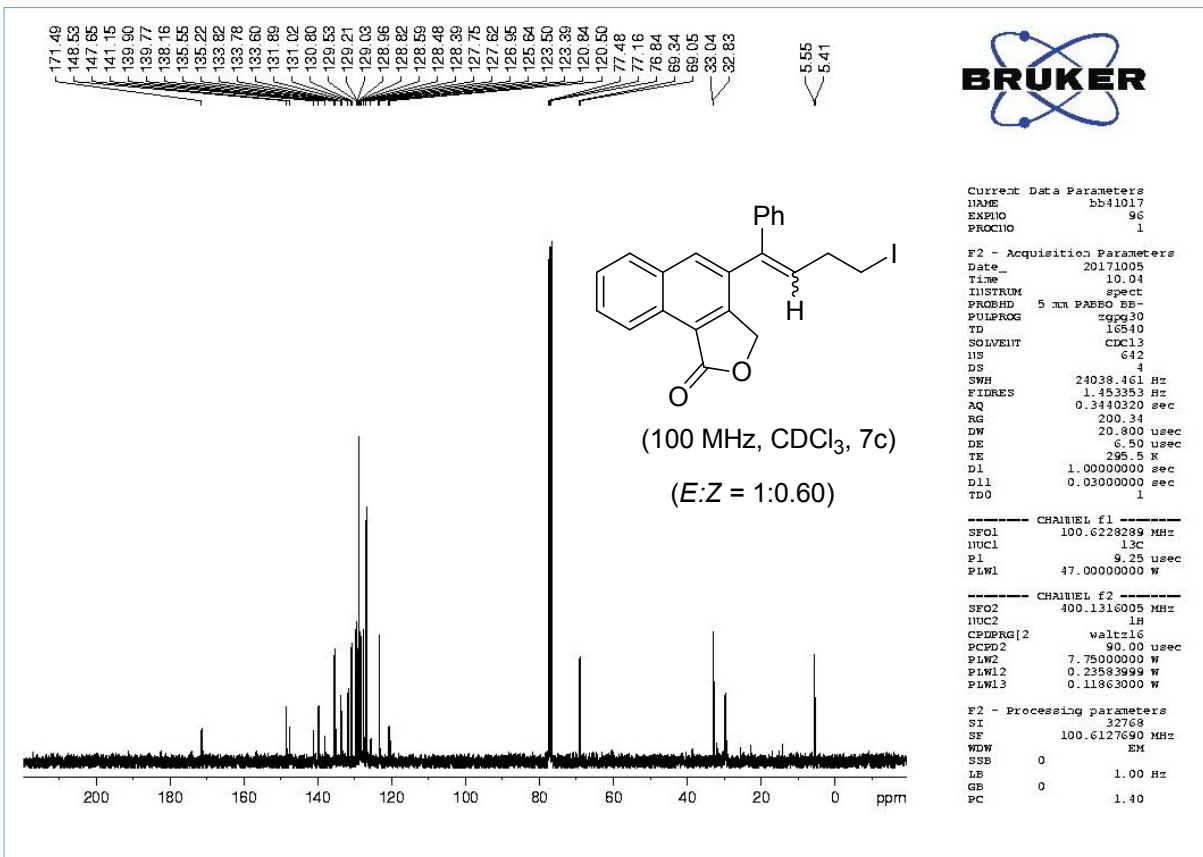

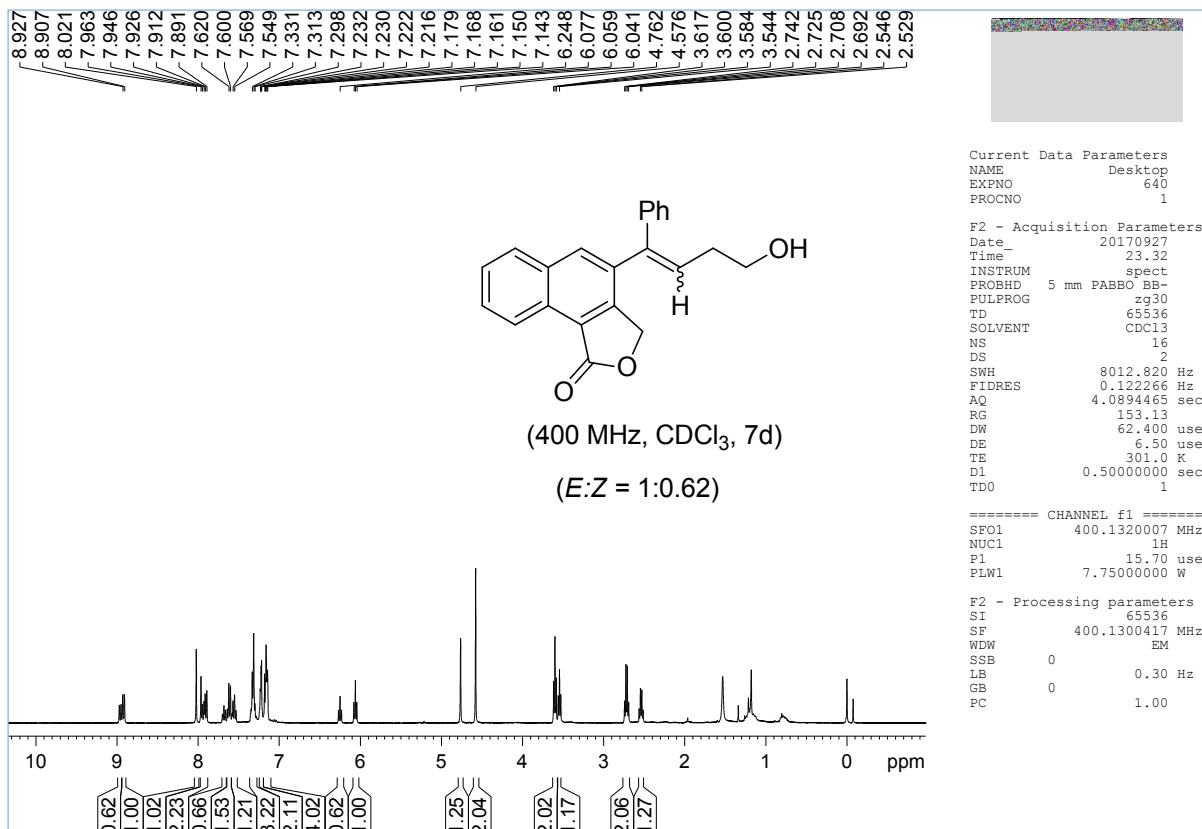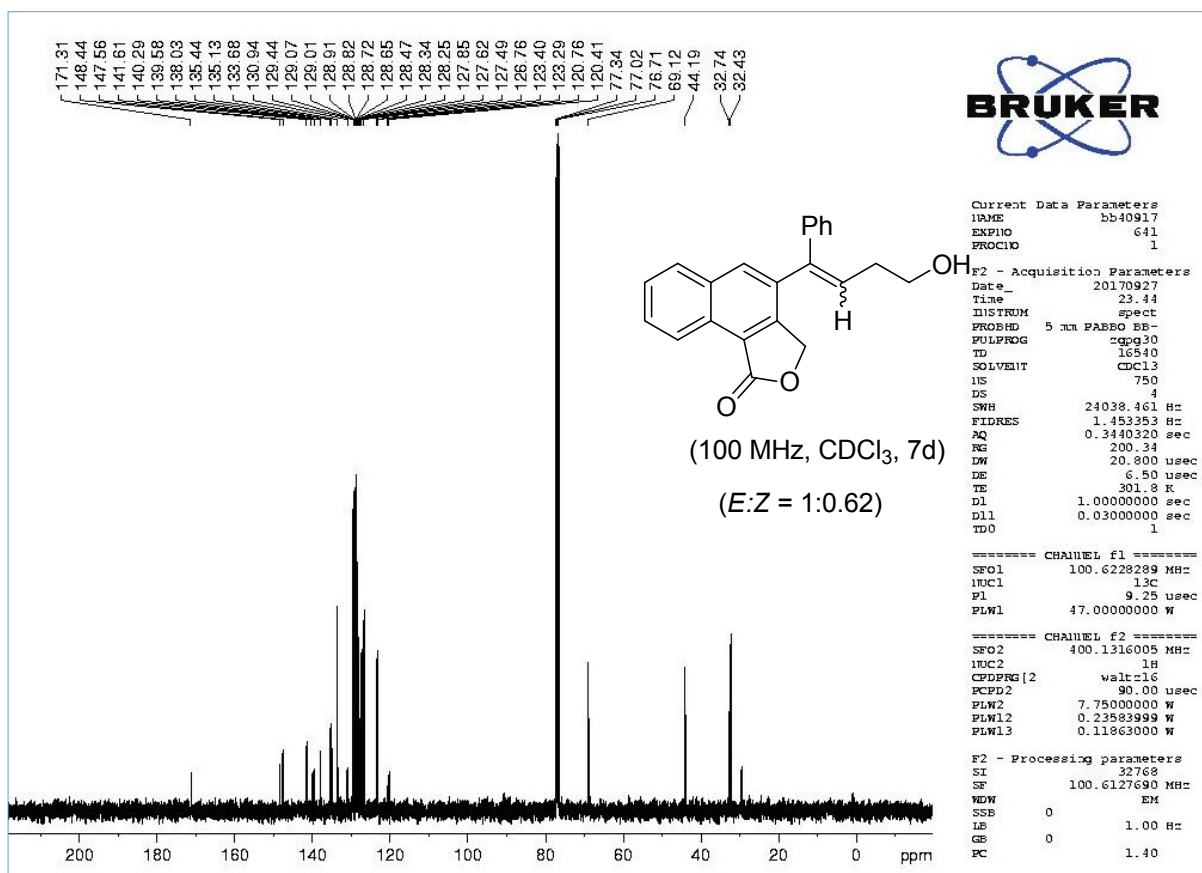

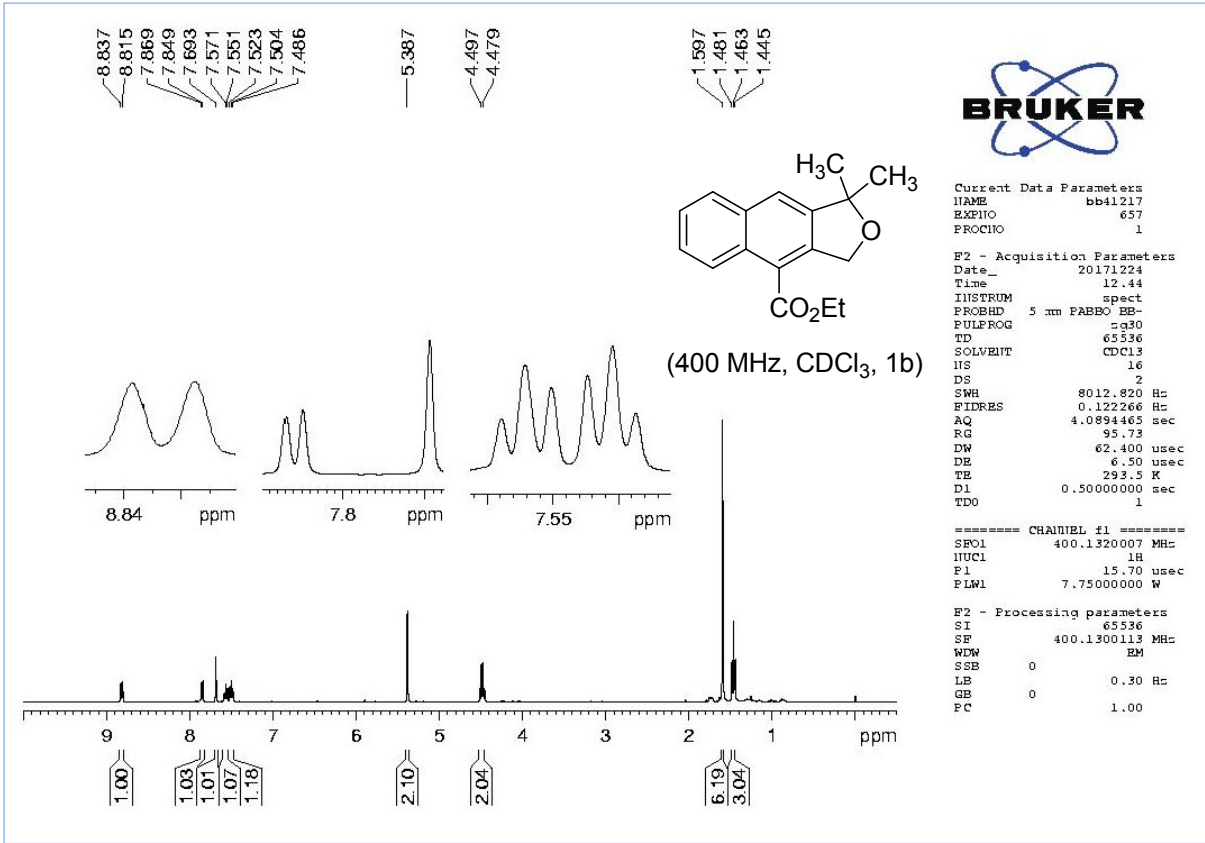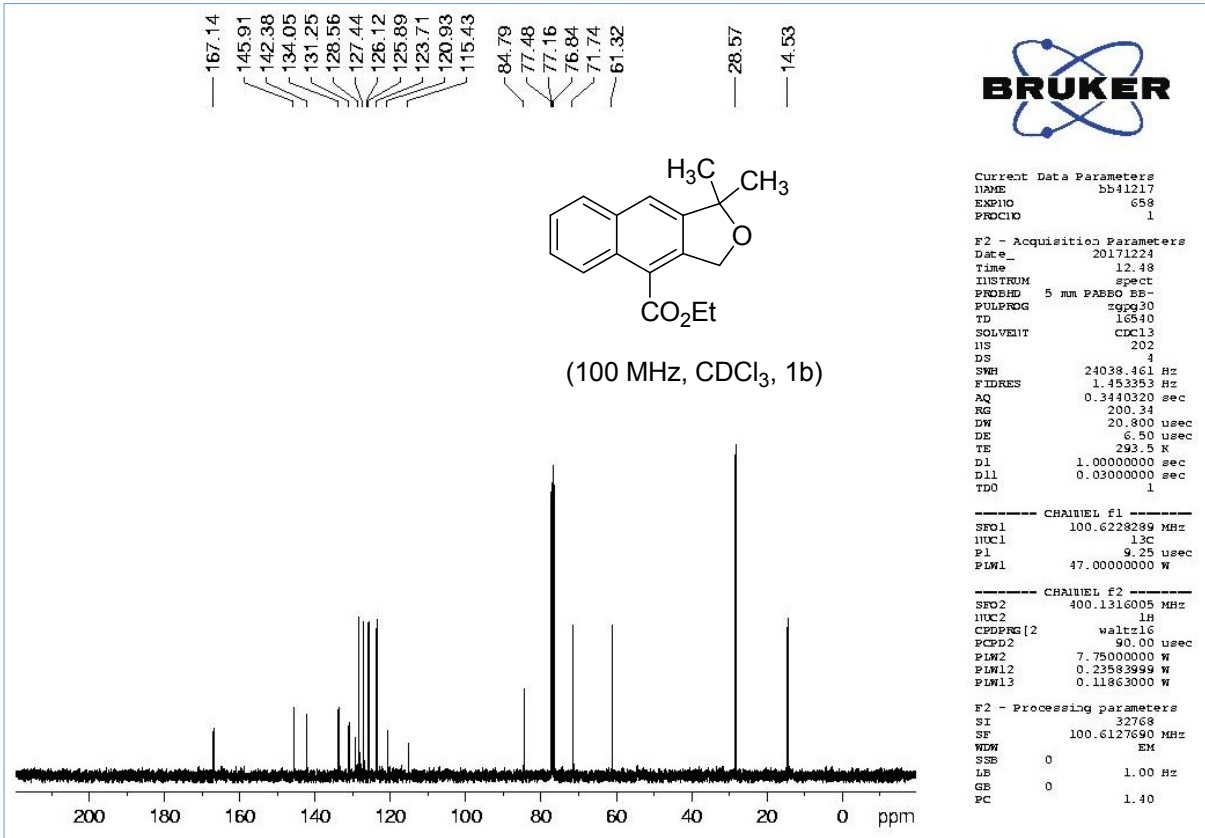

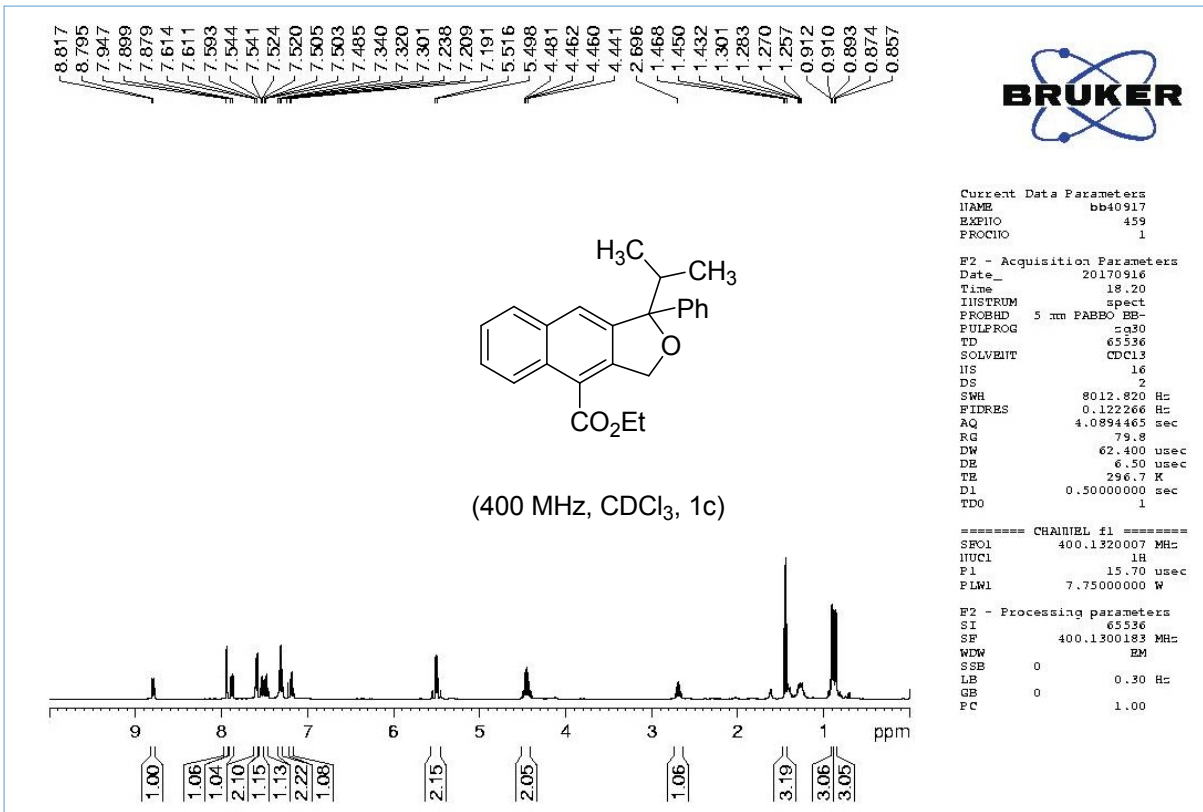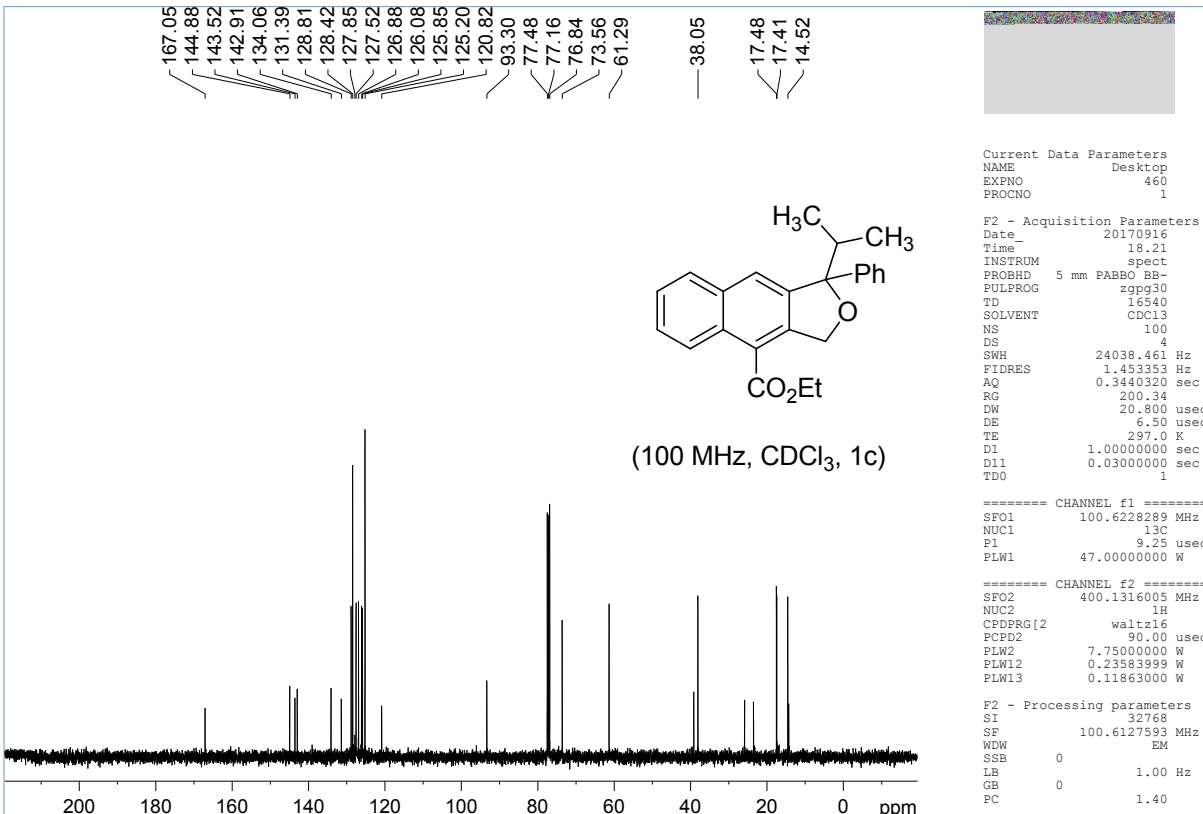



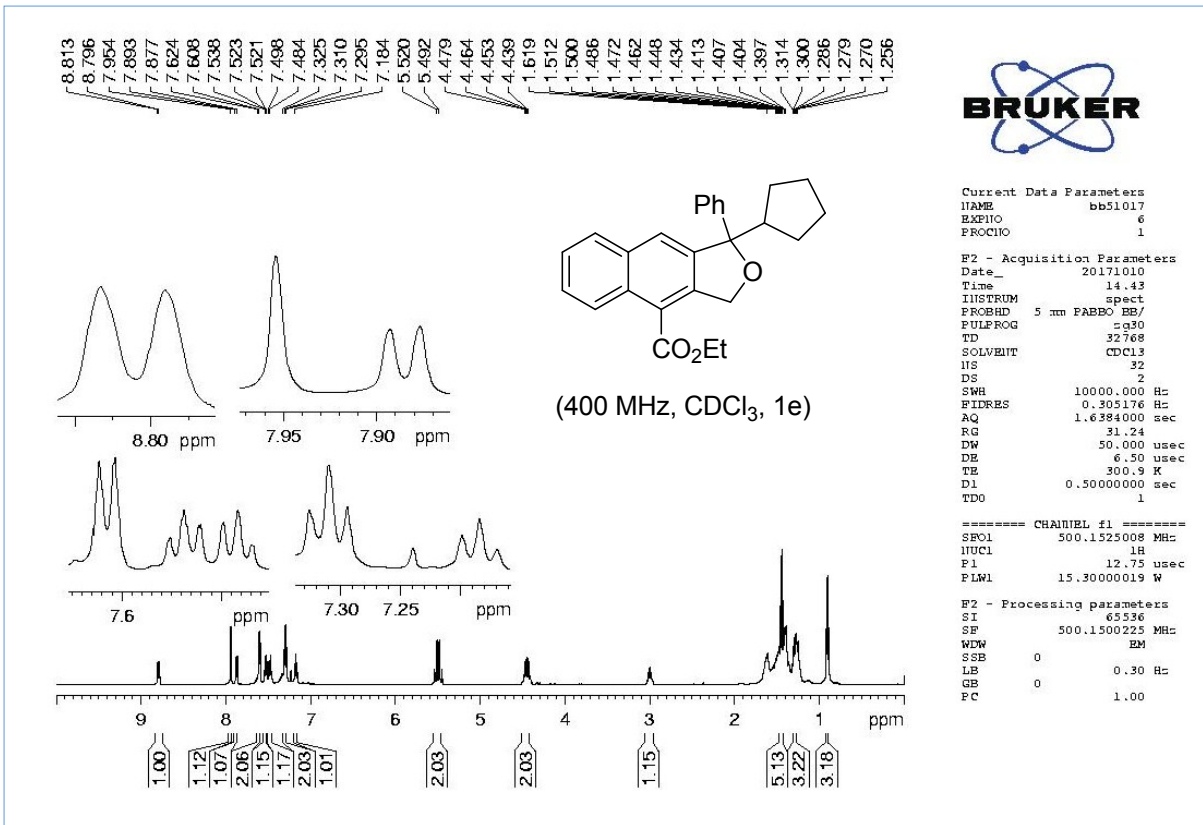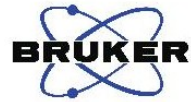

```

Current Data Parameters
NAME      bb51017
EXPNO     6
PROCNO    1

F2 - Acquisition Parameters
Date_     20171010
Time      14.43
INSTRUM   spect
PROBHD    5 mm FAPBO BB/
PULPROG   zg30
TD         32768
SOLVENT   CDCl3
NS         32
DS         2
SWH        10000.000 Hz
FIDRES     0.305176 Hz
AQ         1.6384000 sec
RG         31.24
DW         50.000 usec
DE         6.50 usec
TE         300.9 K
D1         0.50000000 sec
TDO        1

===== CHANNEL f1 =====
SFO1      500.1525008 MHz
NUC1       1H
P1         12.75 usec
PLW1      15.30000019 W

F2 - Processing parameters
SI         65536
SF         500.1500225 MHz
WDW        EM
SSB        0
LB         0.30 Hz
GB         0
PC         1.00
  
```

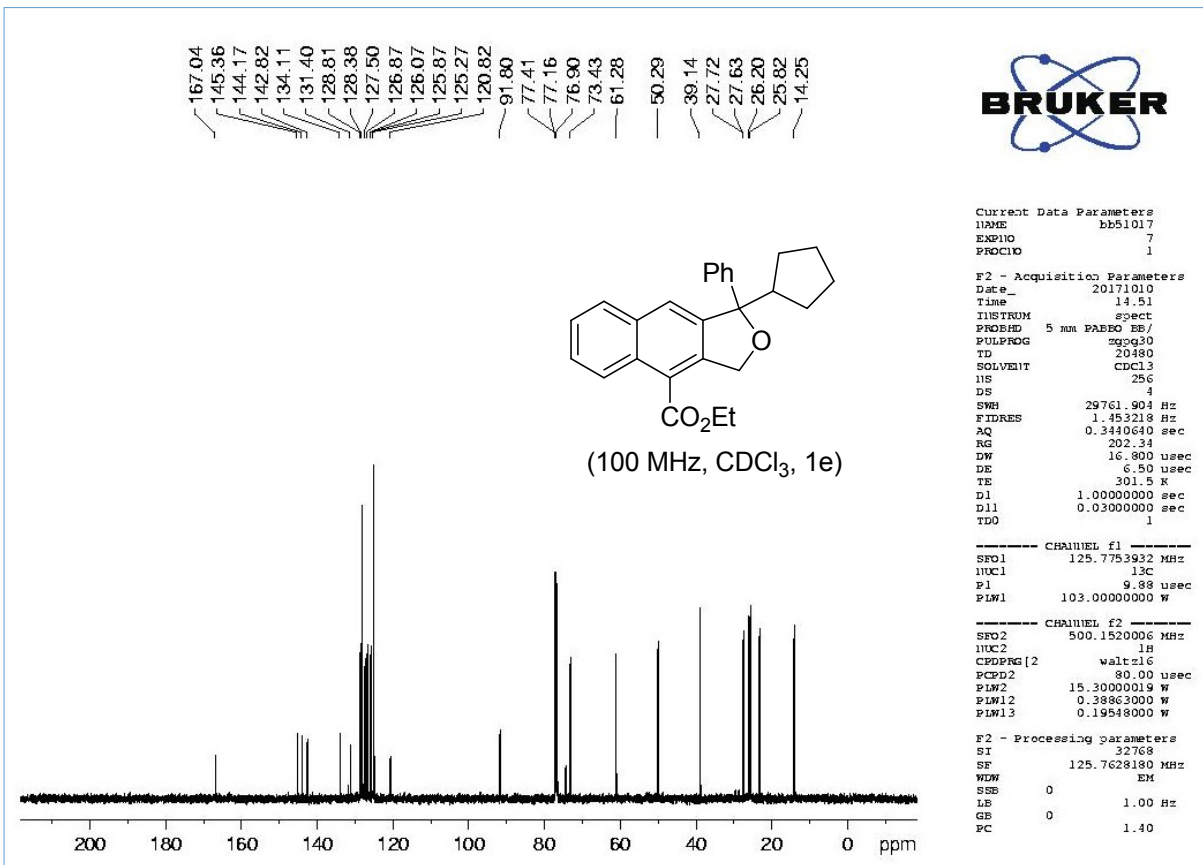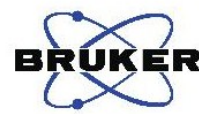

```

Current Data Parameters
NAME      bb51017
EXPNO     7
PROCNO    1

F2 - Acquisition Parameters
Date_     20171010
Time      14.51
INSTRUM   spect
PROBHD    5 mm FAPBO BB/
PULPROG   zgpg30
TD         20480
SOLVENT   CDCl3
NS         256
DS         4
SWH        29761.904 Hz
FIDRES     1.453218 Hz
AQ         0.3440640 sec
RG         202.34
DW         16.800 usec
DE         6.50 usec
TE         301.5 K
D1         1.00000000 sec
D11        0.03000000 sec
TDO        1

----- CHANNEL f1 -----
SFO1      125.7753932 MHz
NUC1       13C
P1         9.88 usec
PLW1      103.00000000 W

----- CHANNEL f2 -----
SFO2      500.1520006 MHz
NUC2       1H
CPDPRG[2] waltz16
PCPD2     80.00 usec
PLW2      15.30000019 W
PLW12     0.38863000 W
PLW13     0.19548000 W

F2 - Processing parameters
SI         32768
SF         125.7628180 MHz
WDW        EM
SSB        0
LB         1.00 Hz
GB         0
PC         1.40
  
```

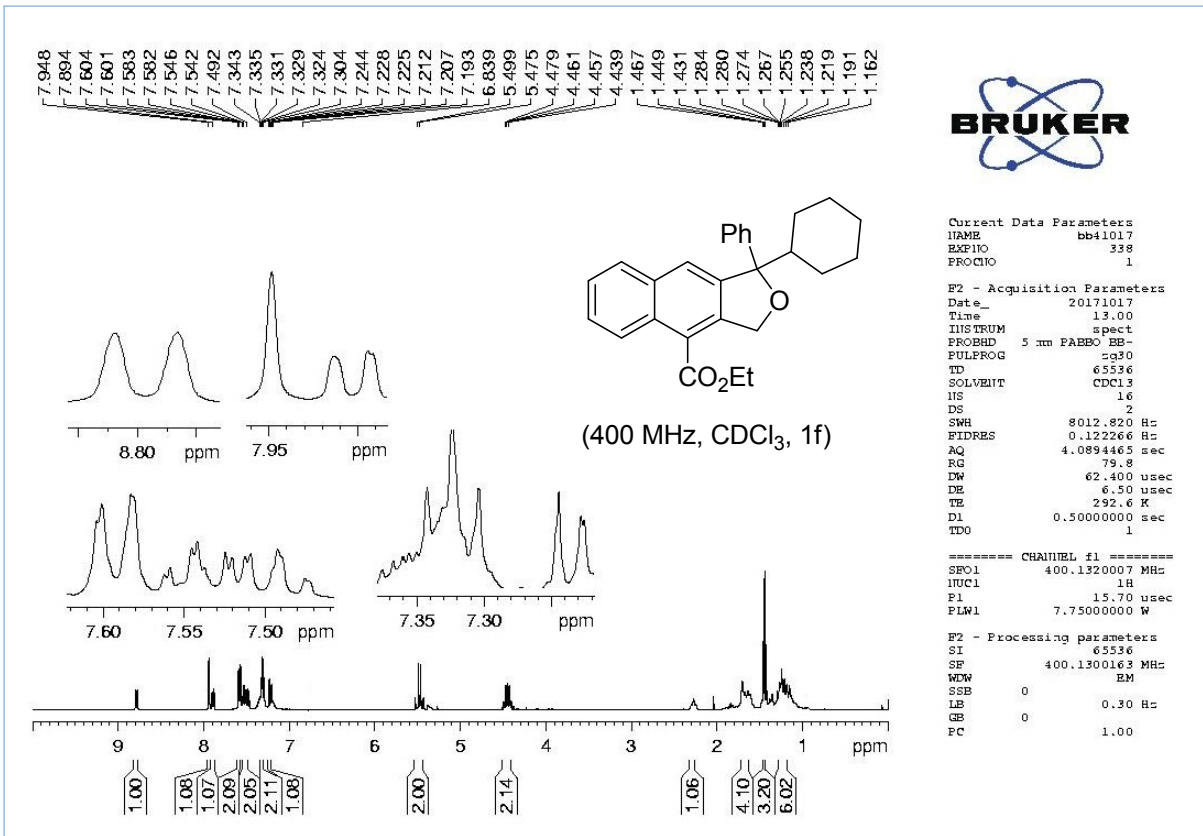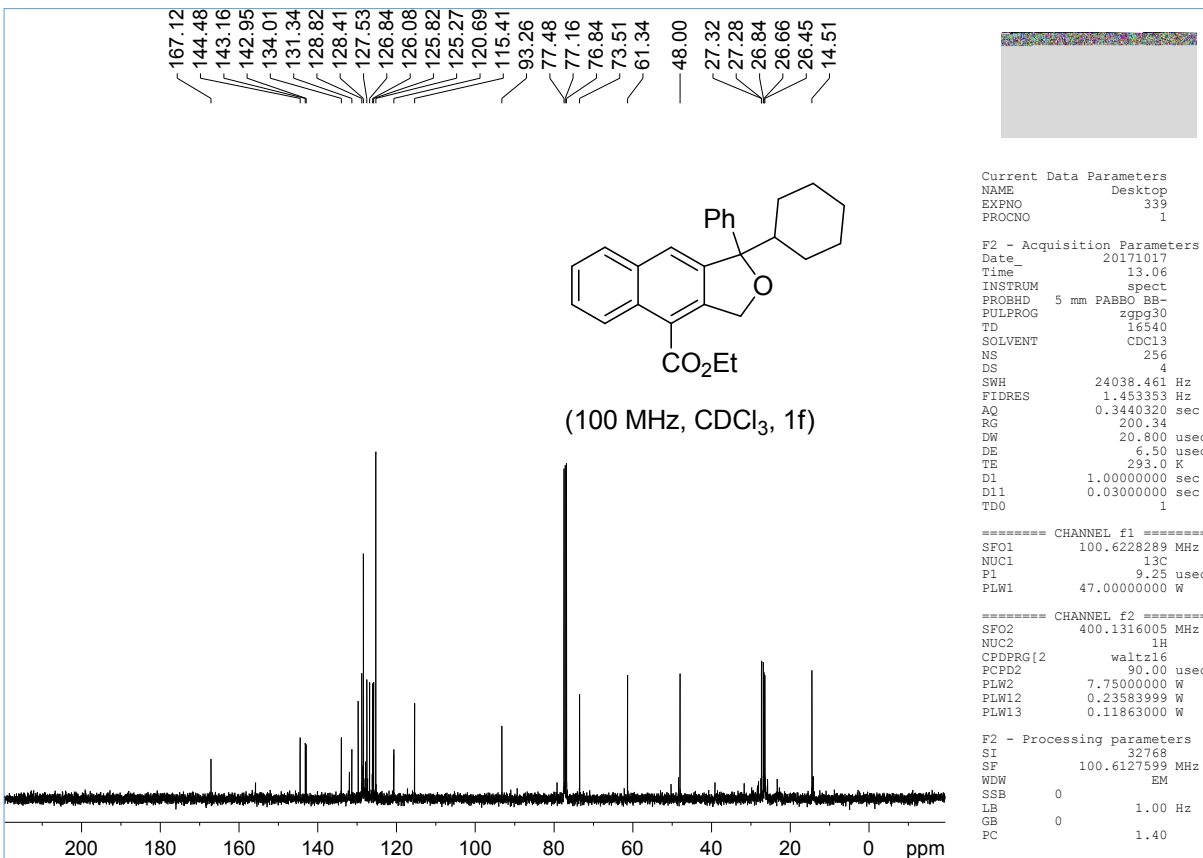

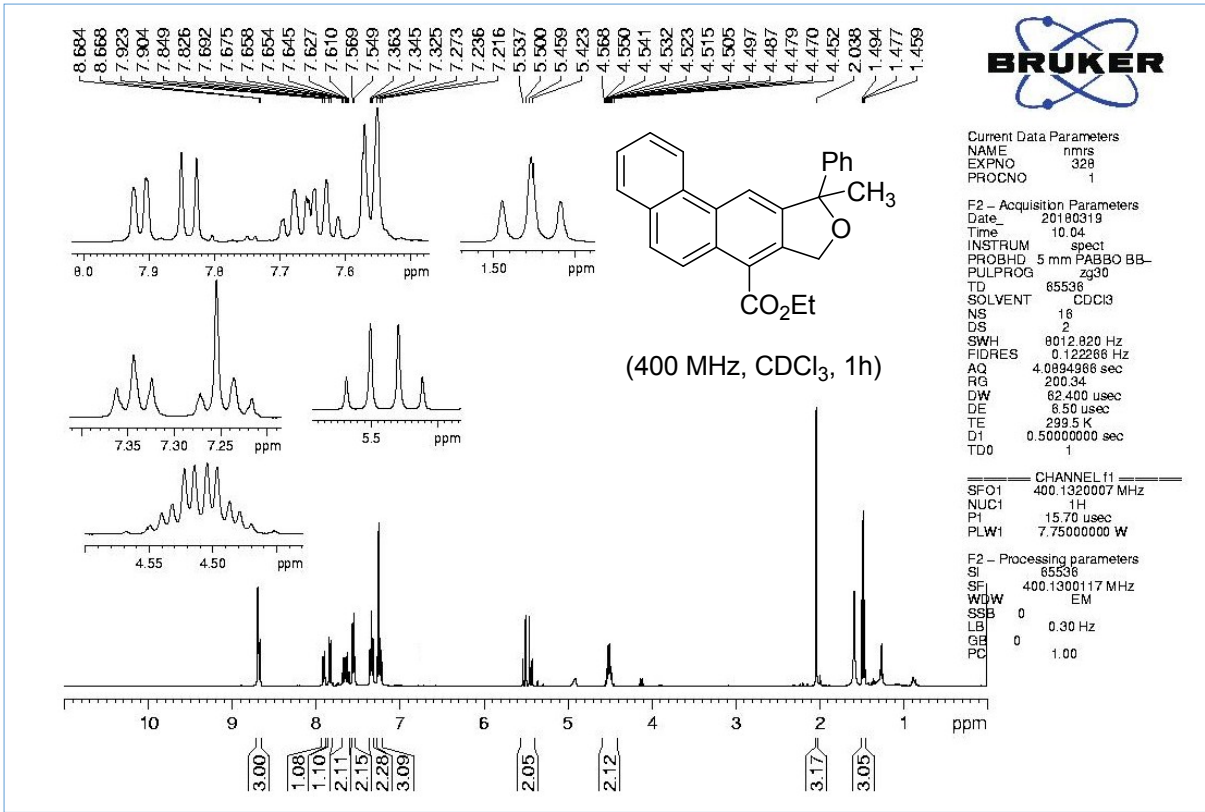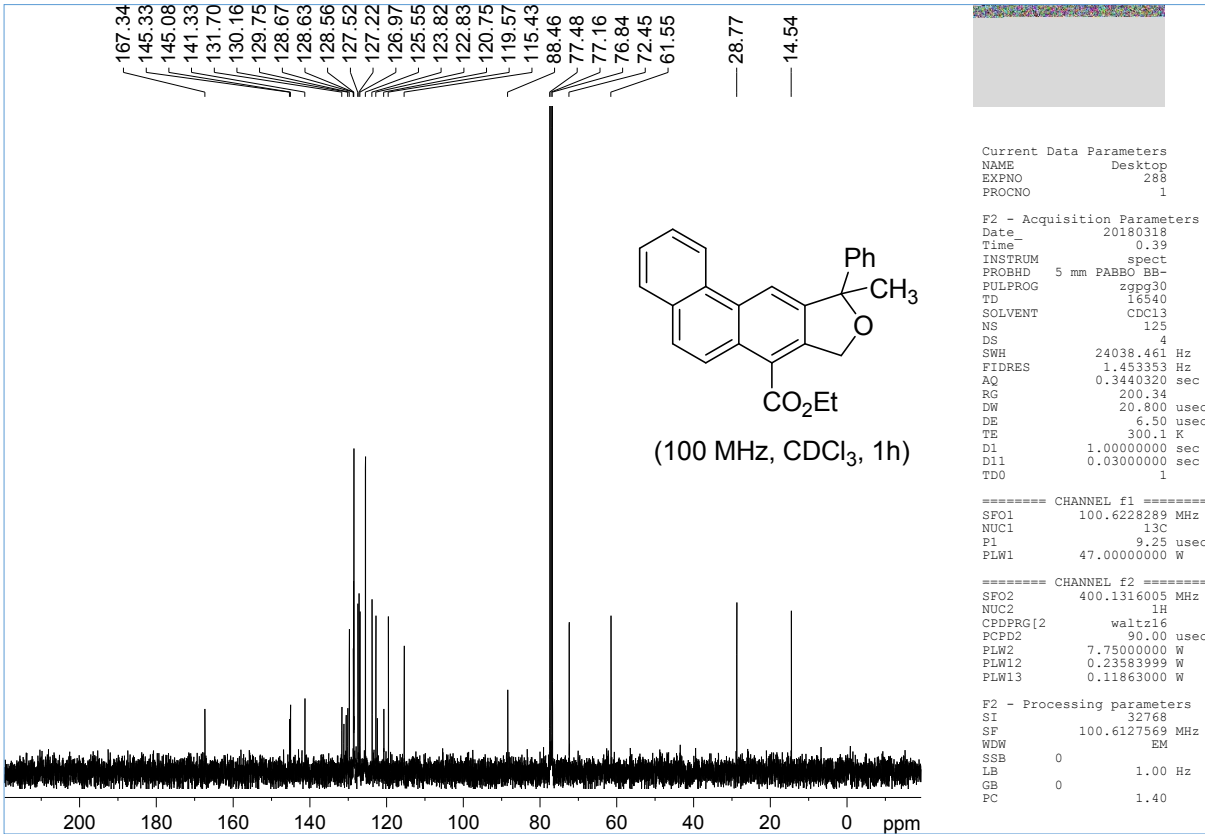

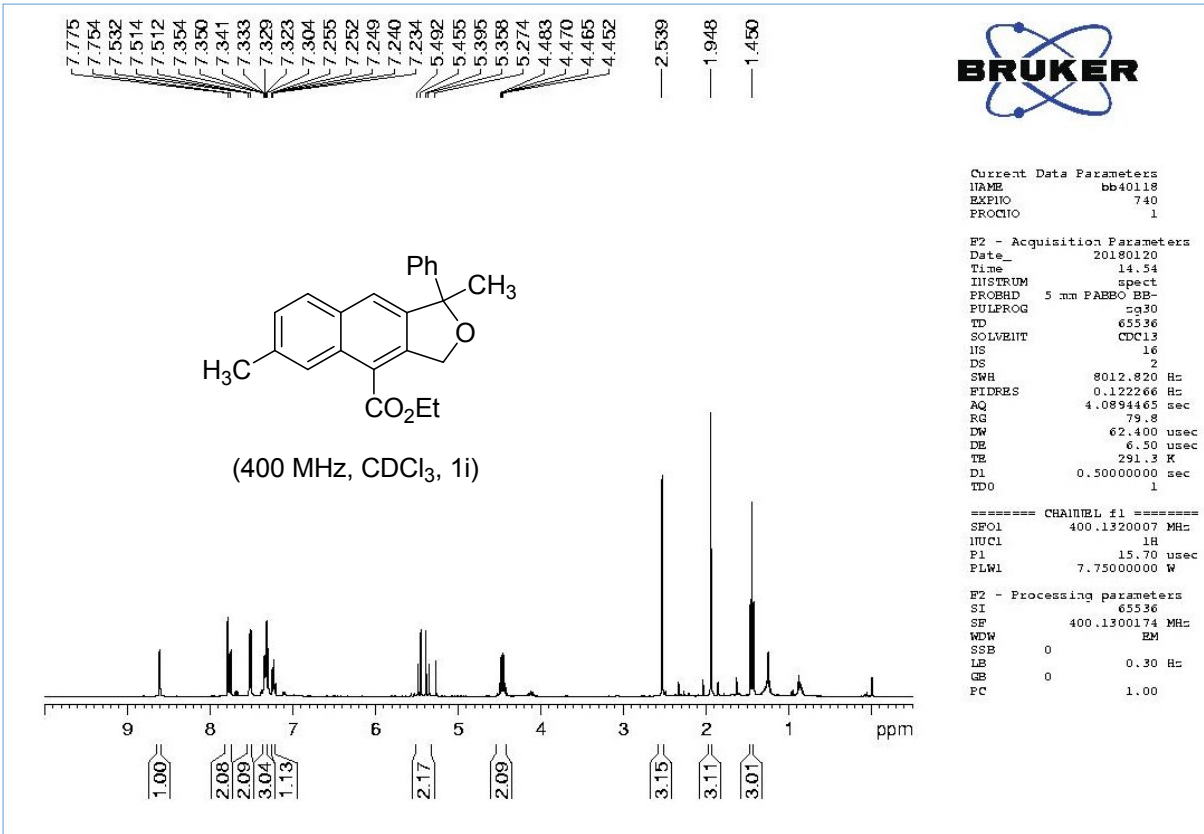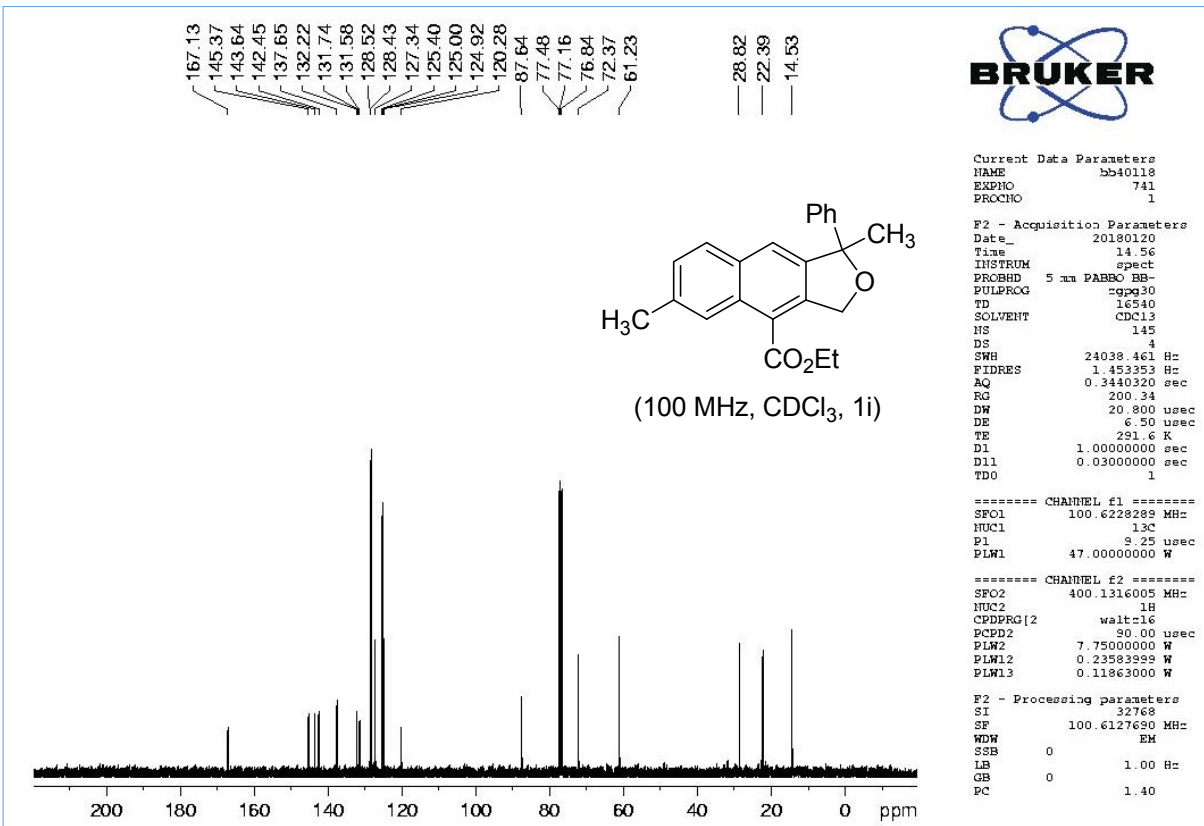

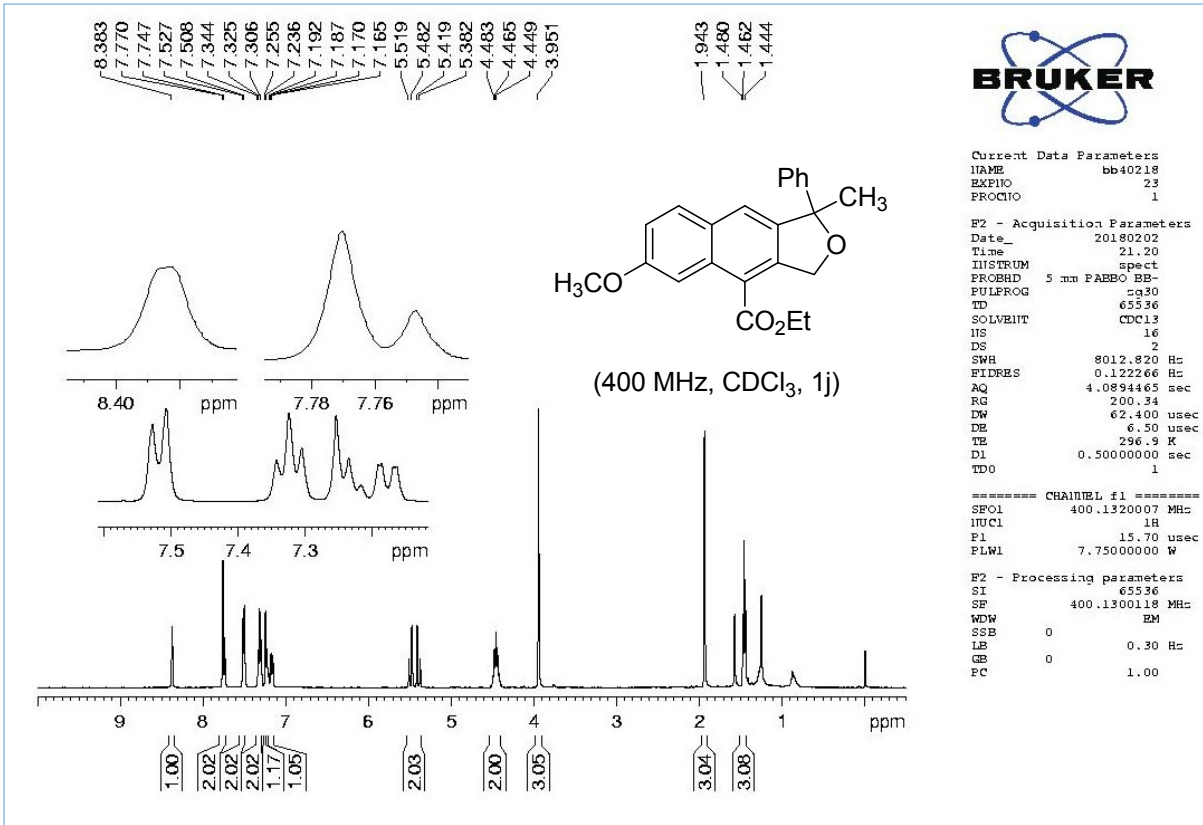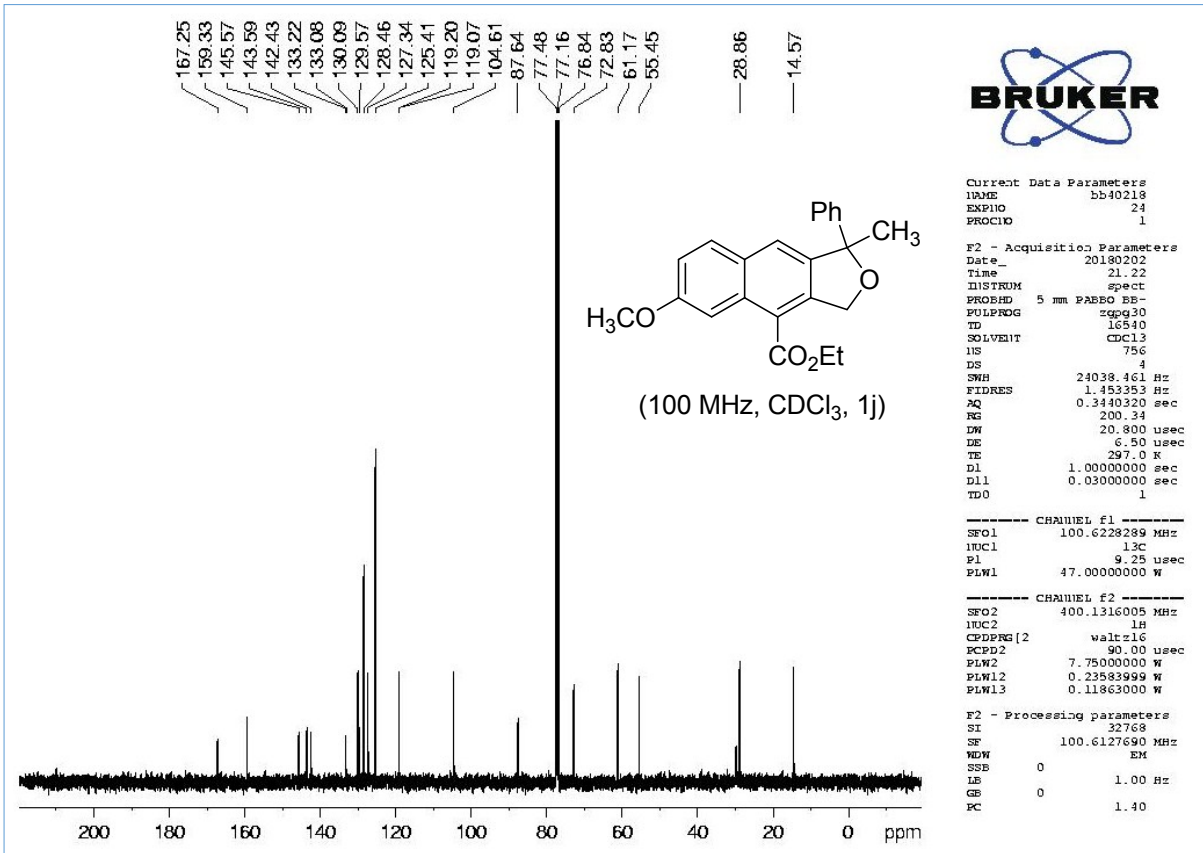



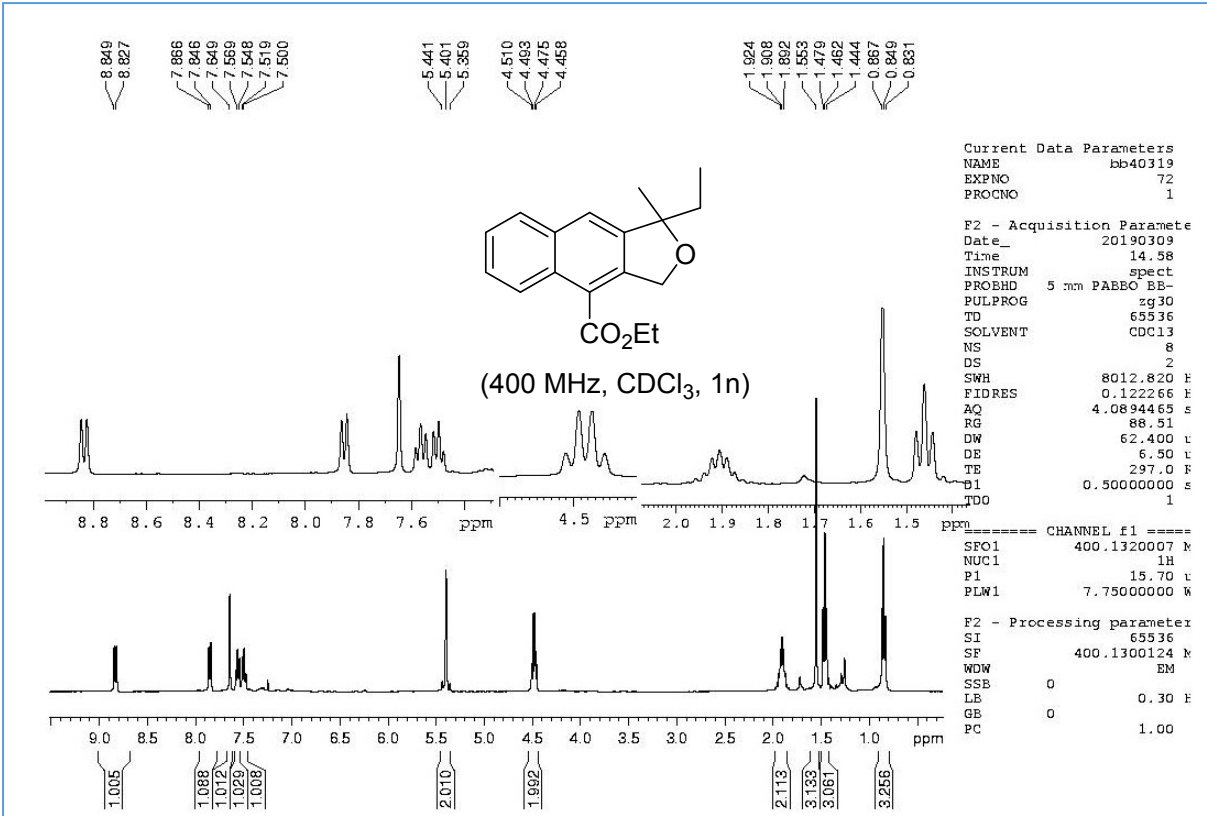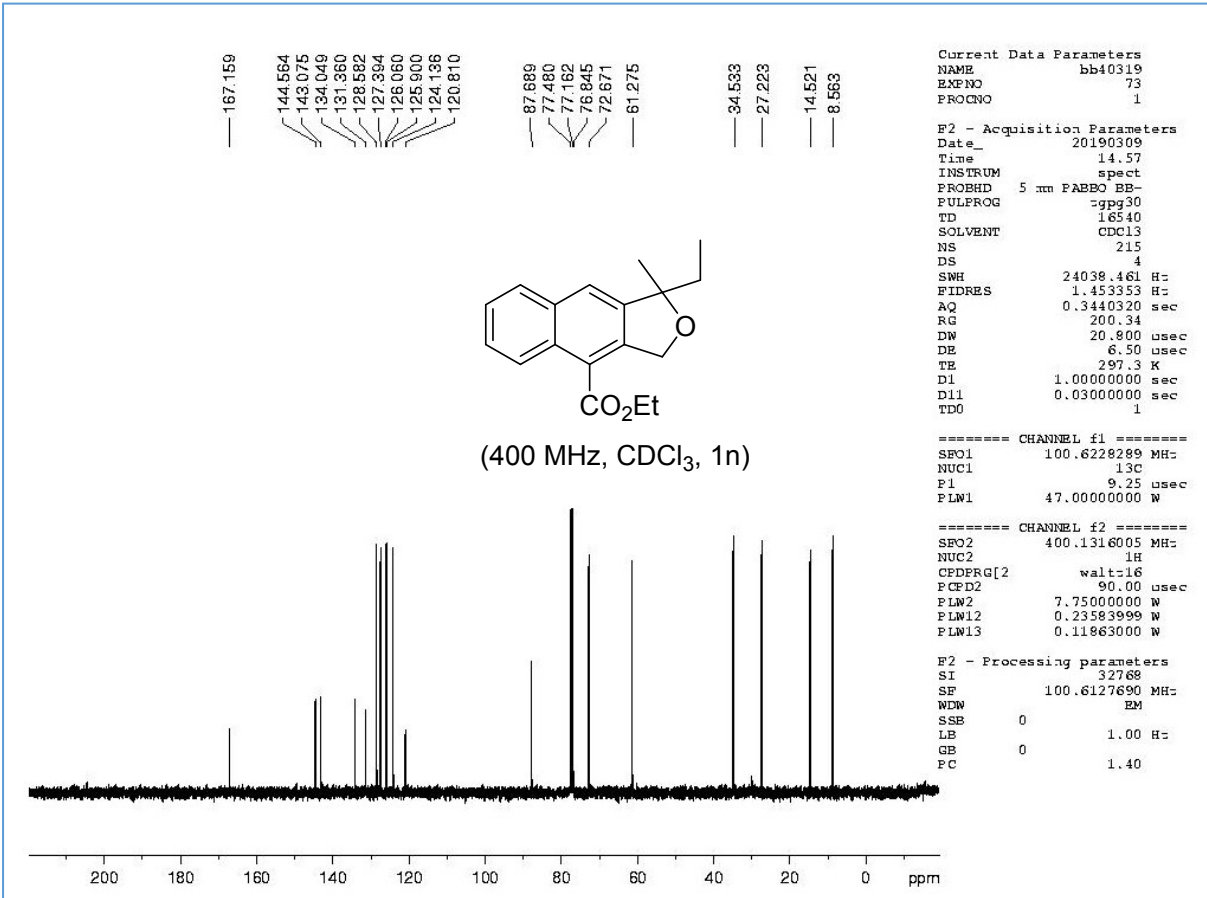



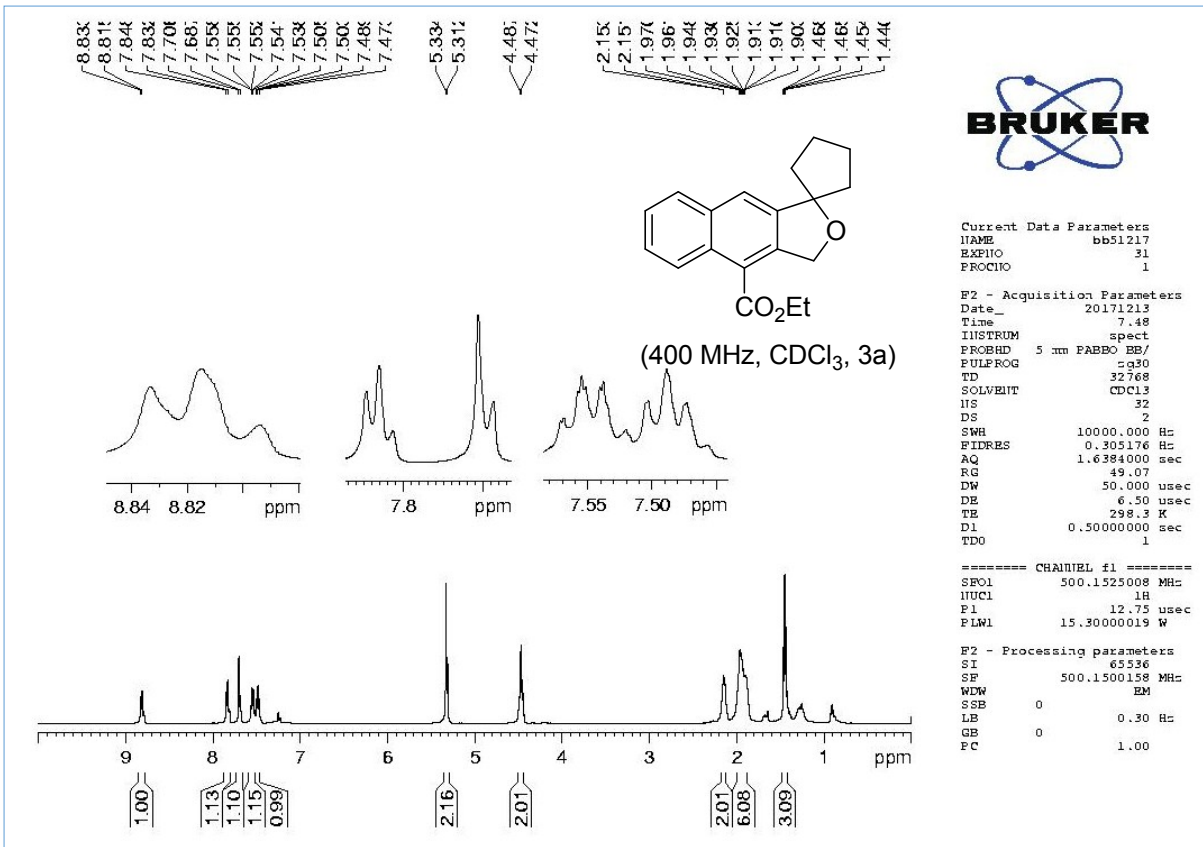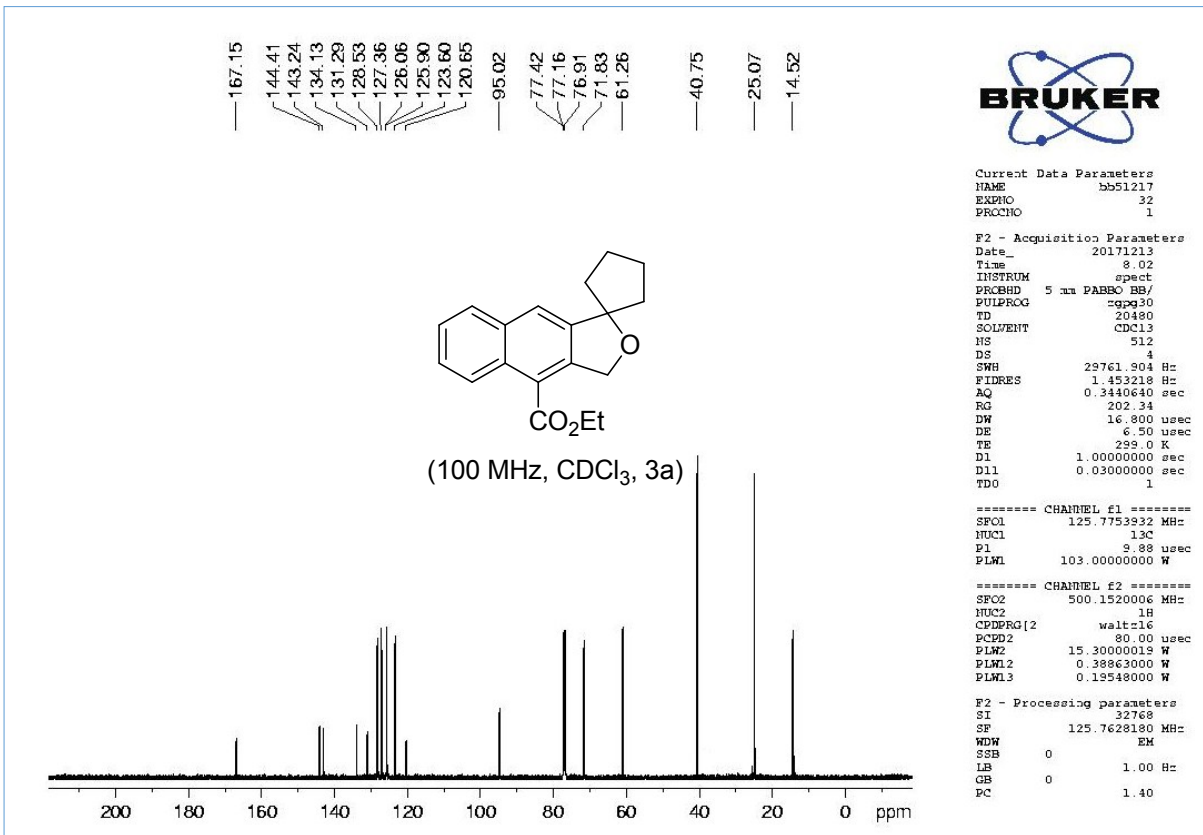

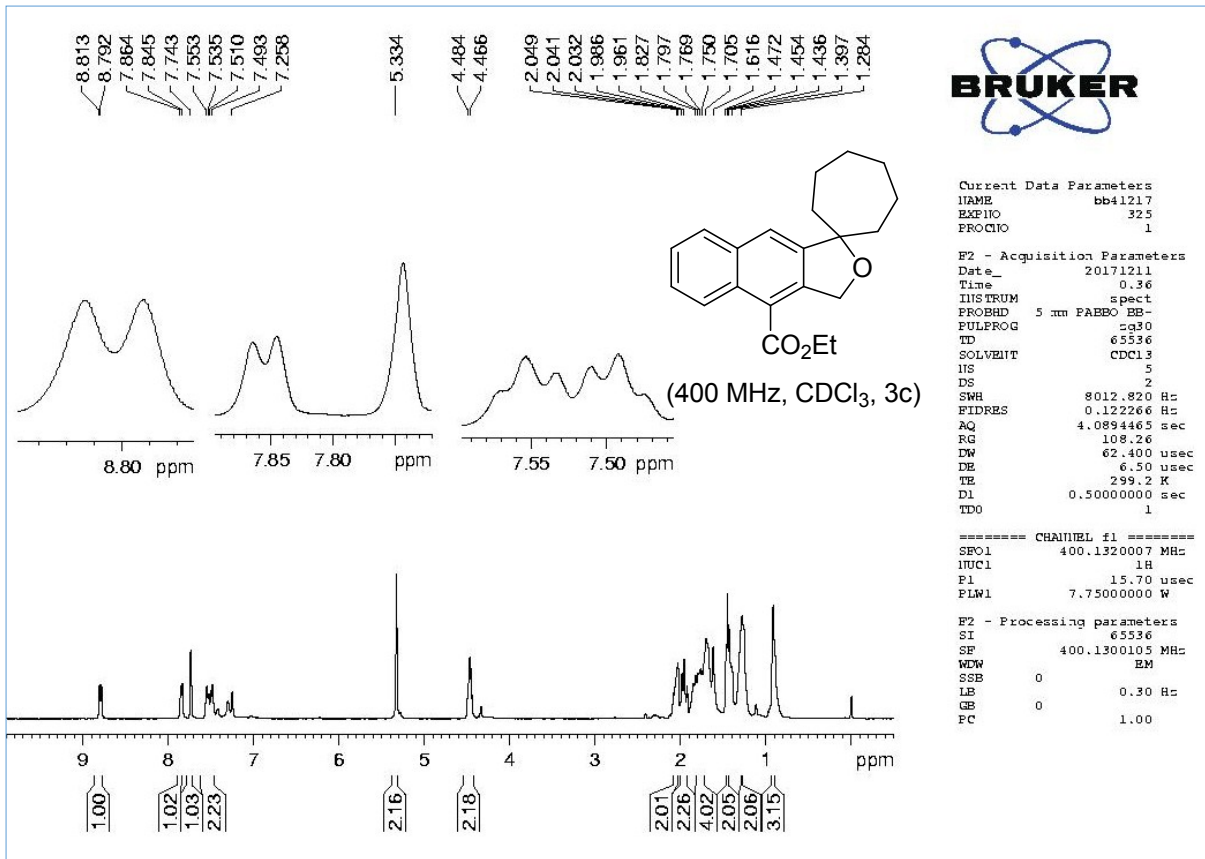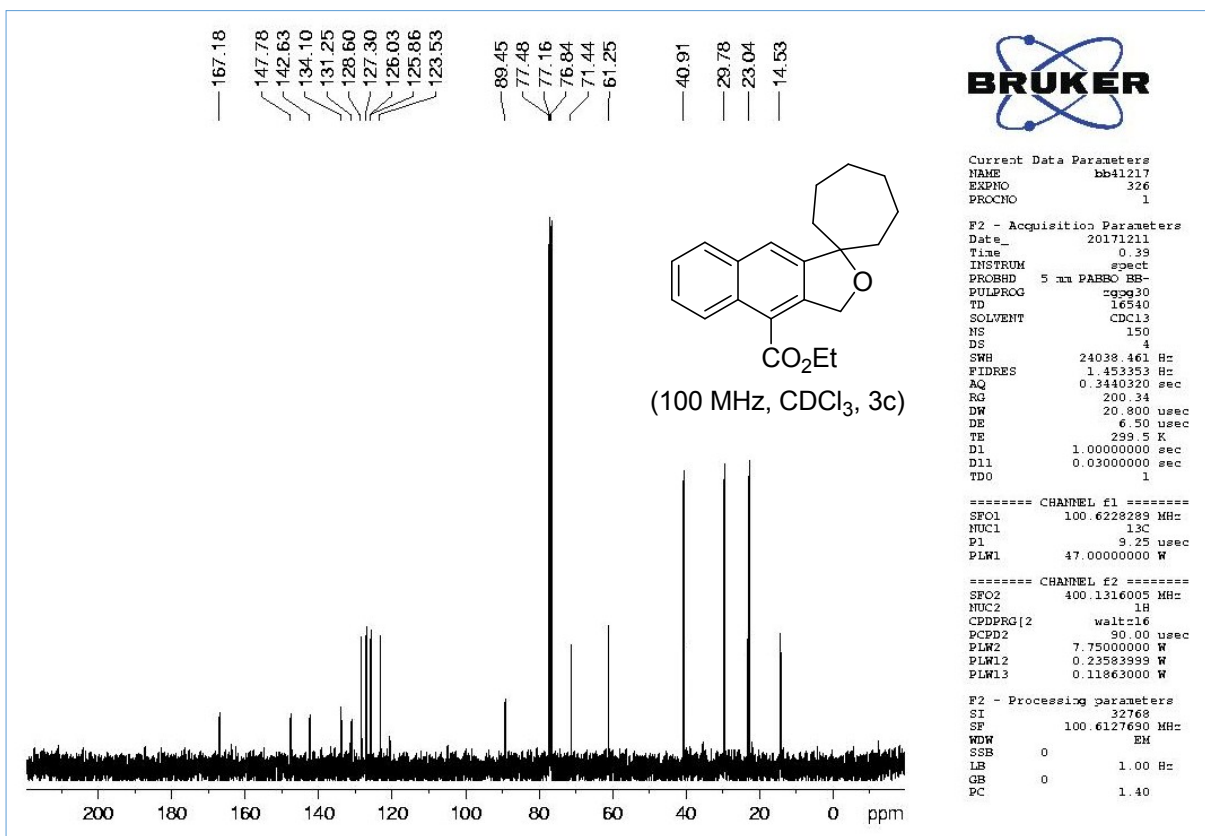

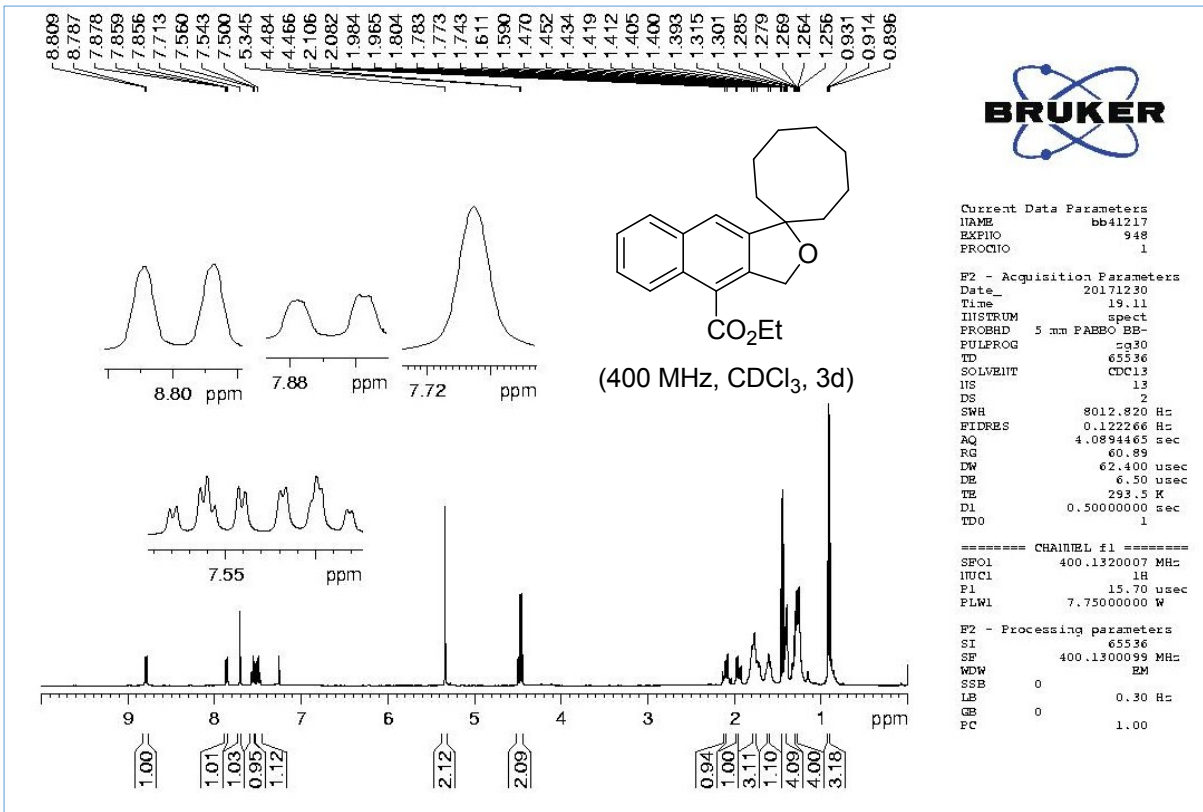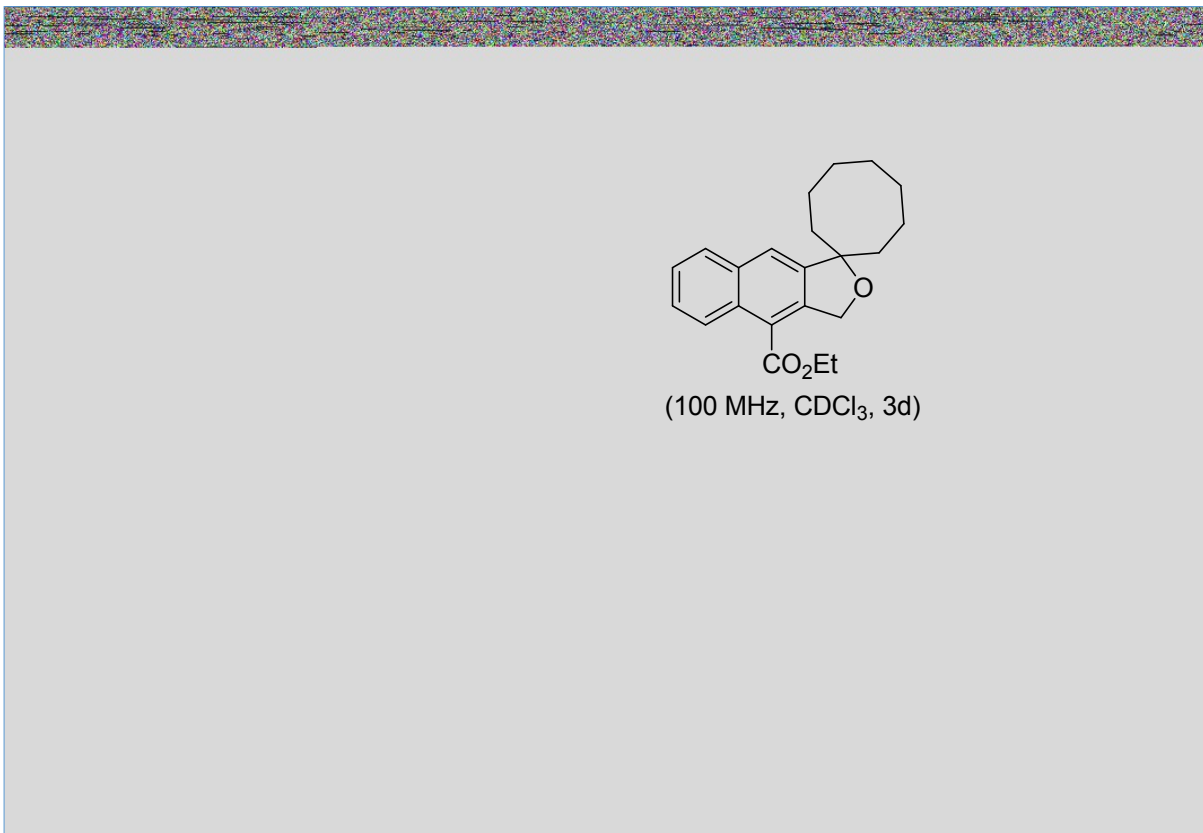

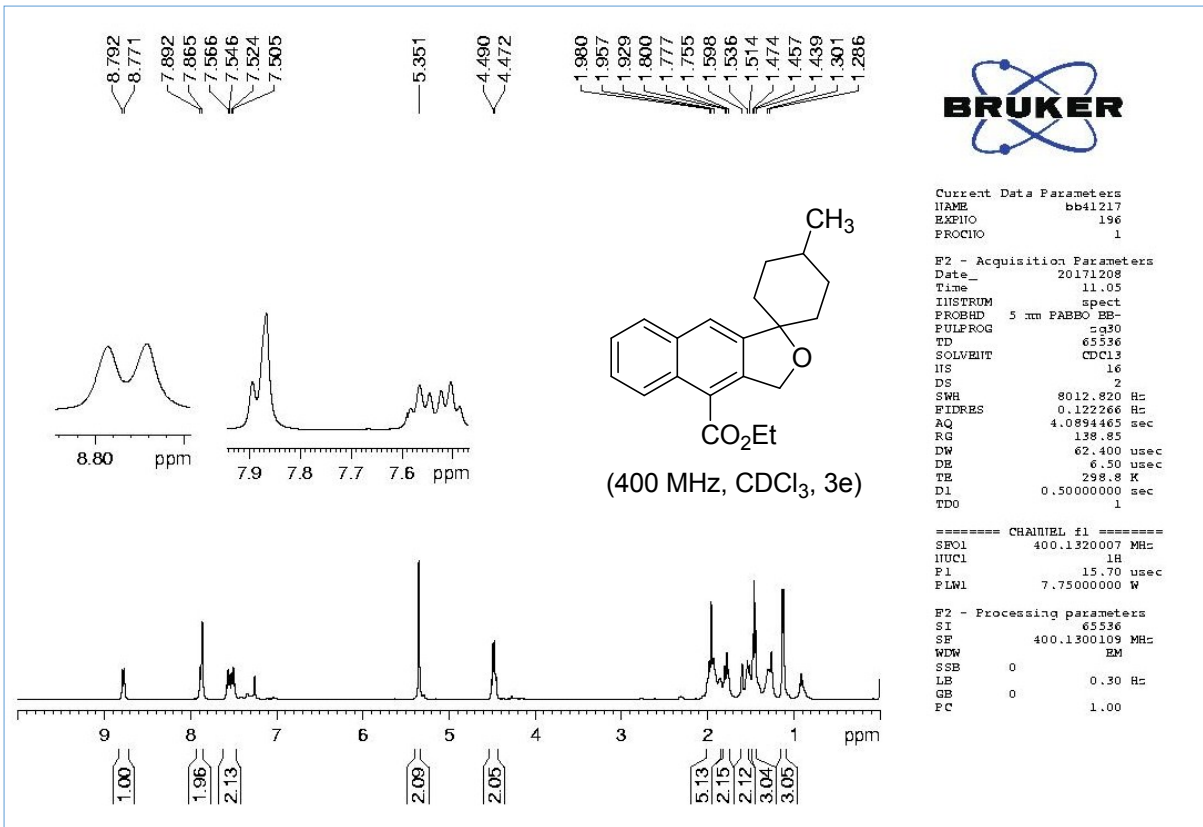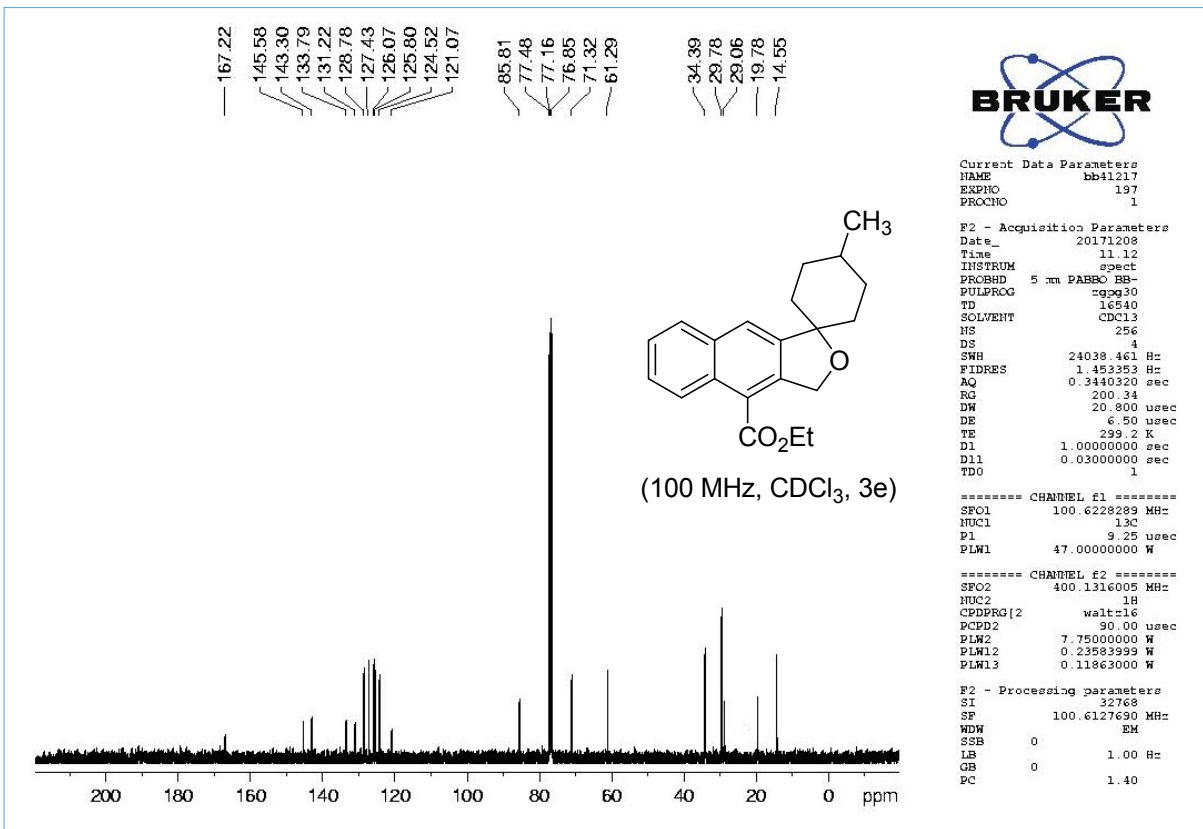

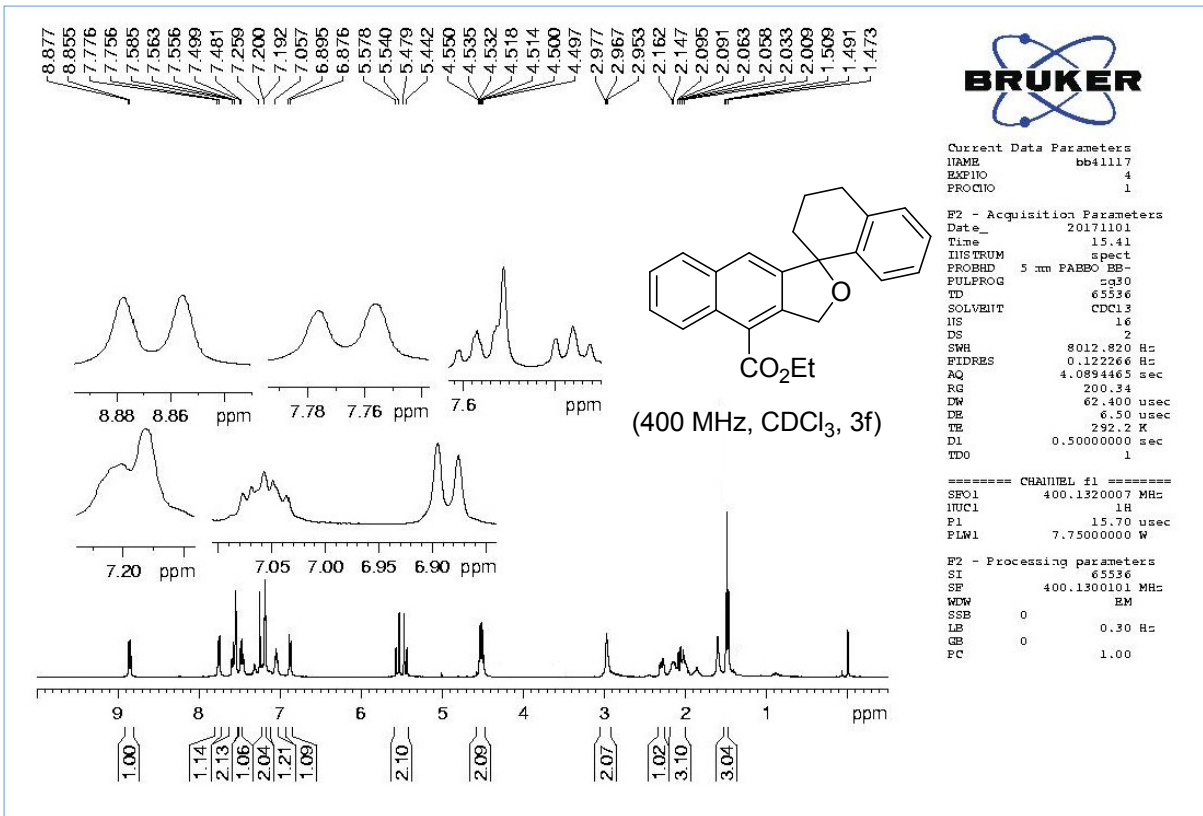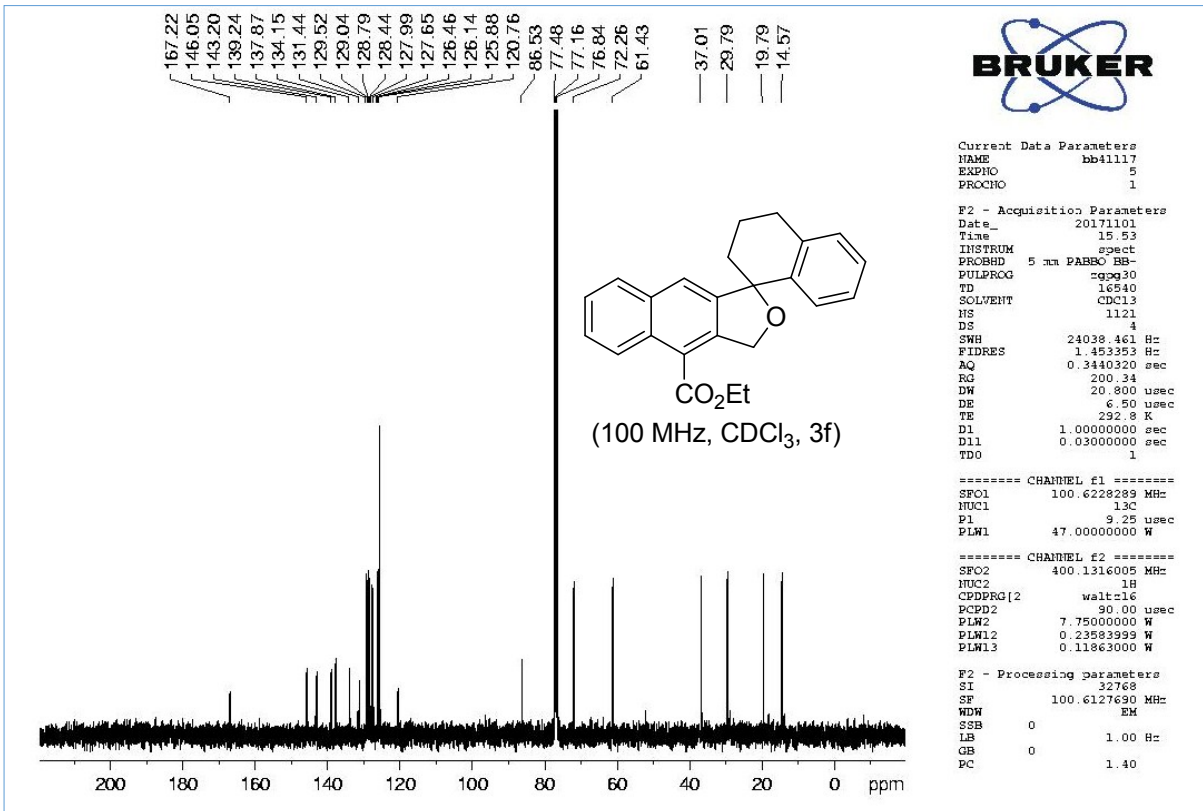



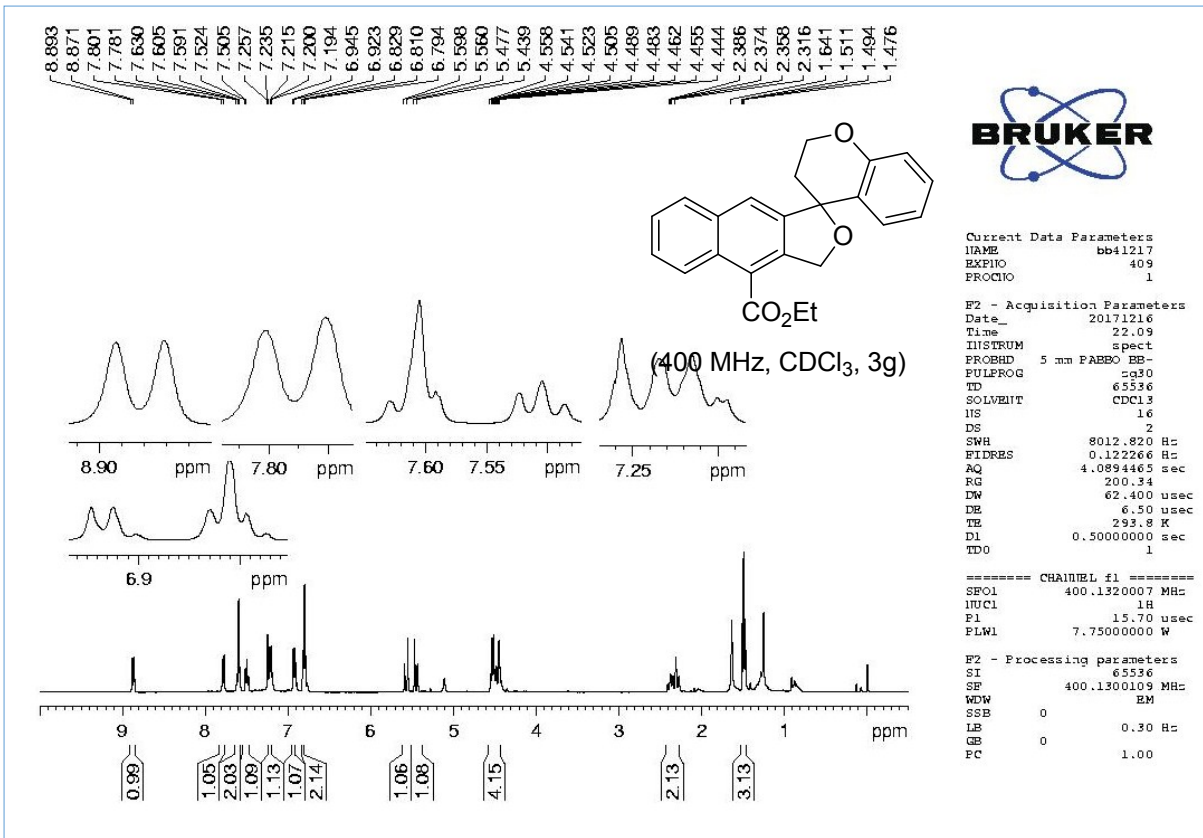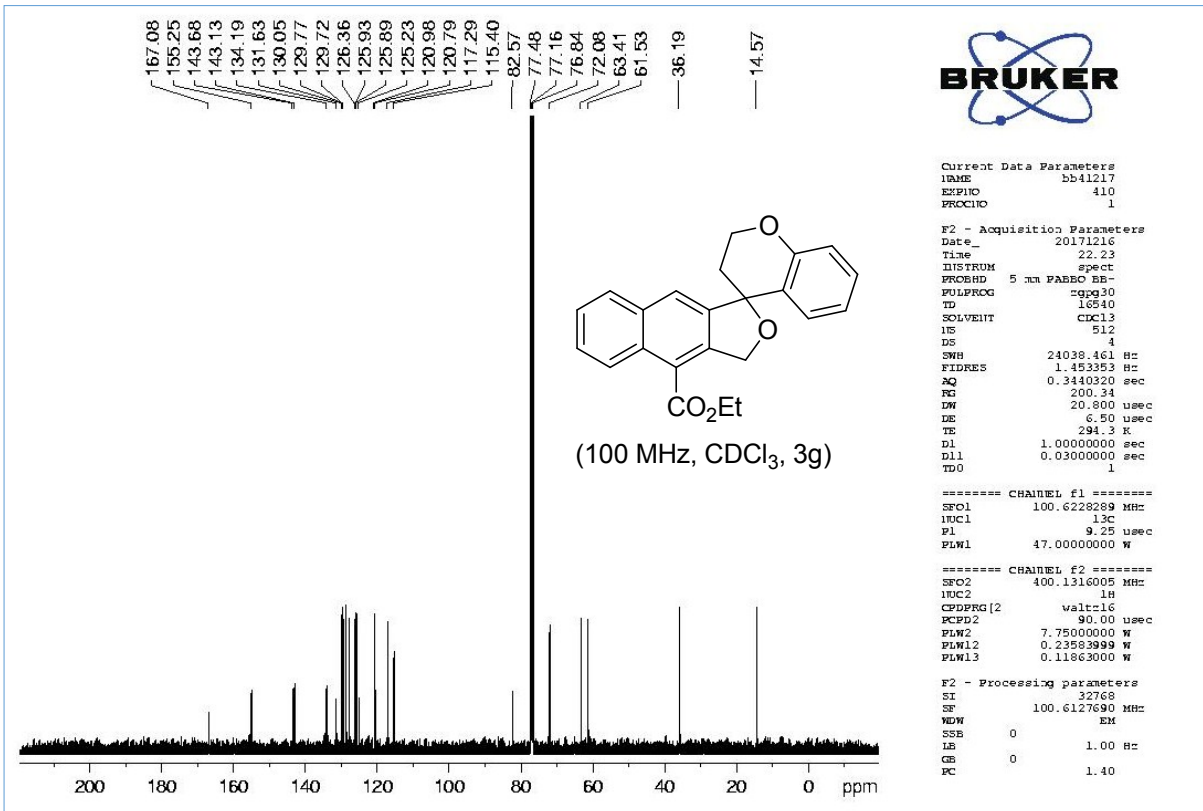



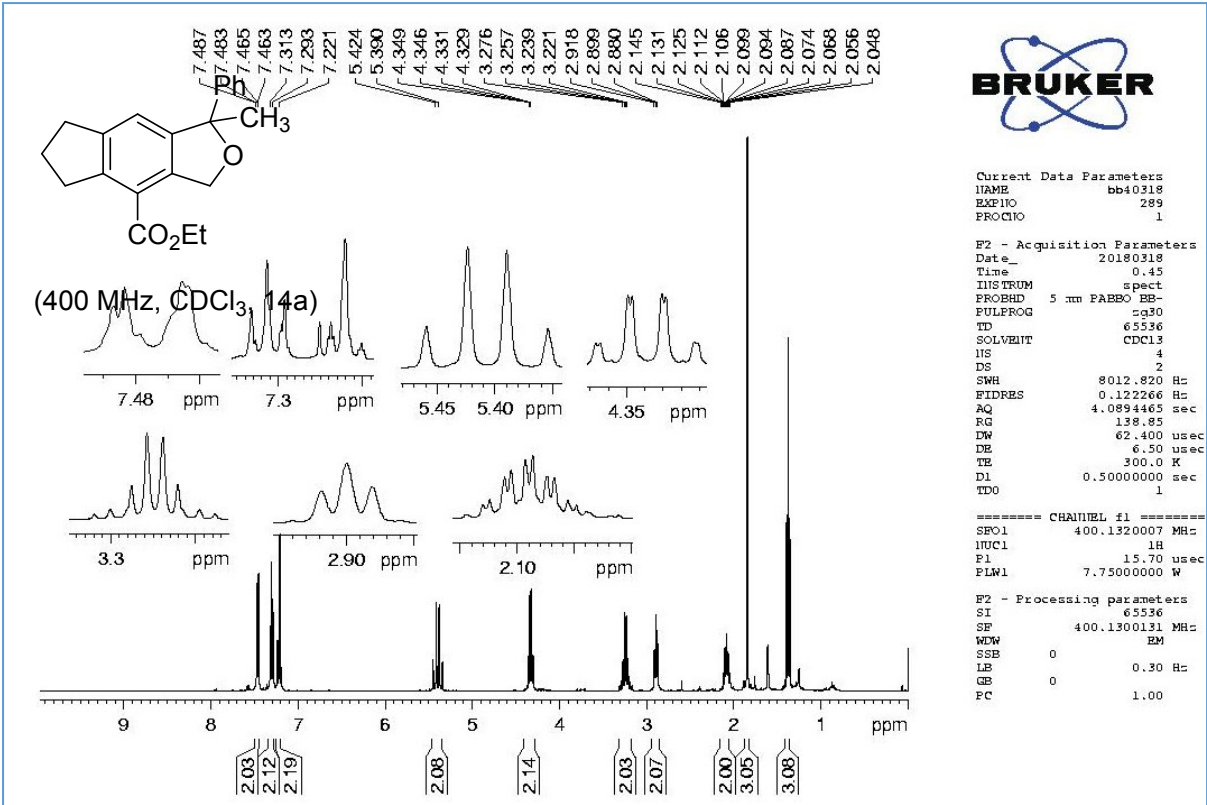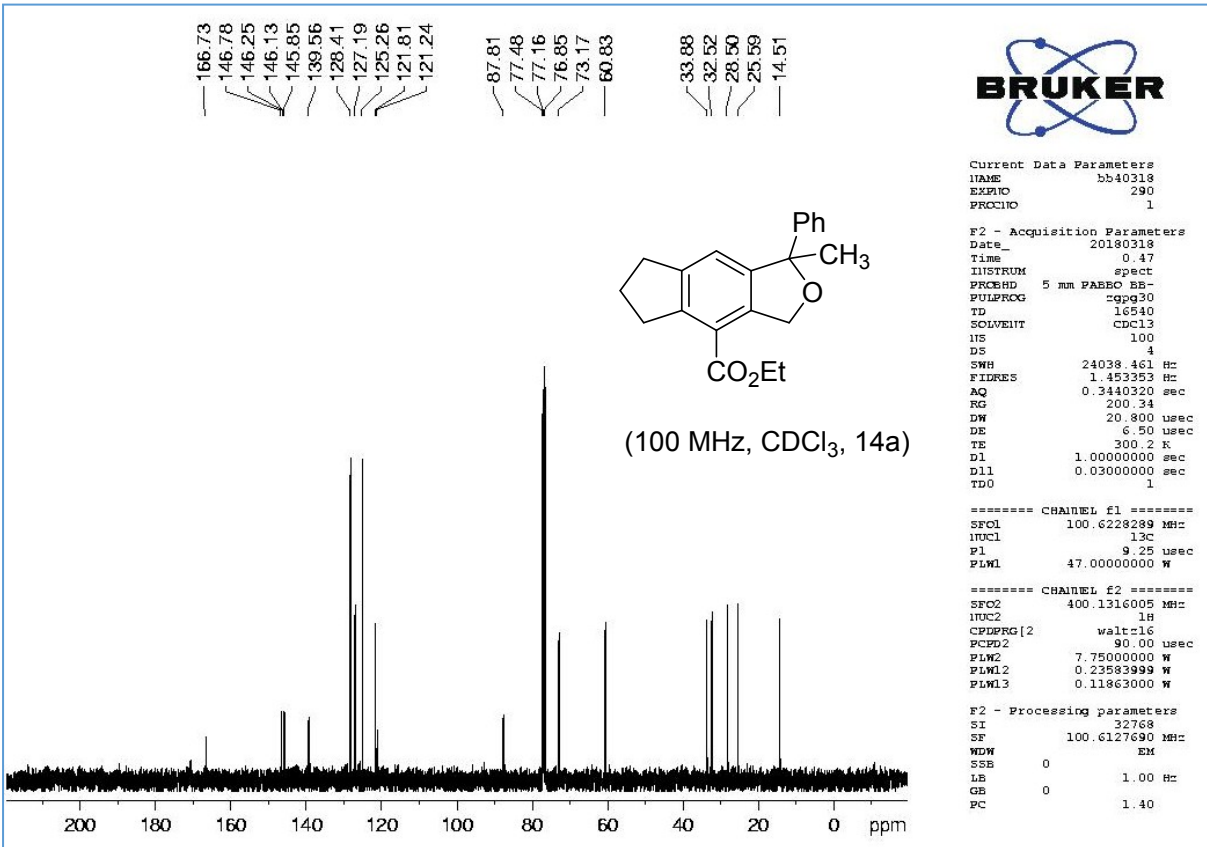

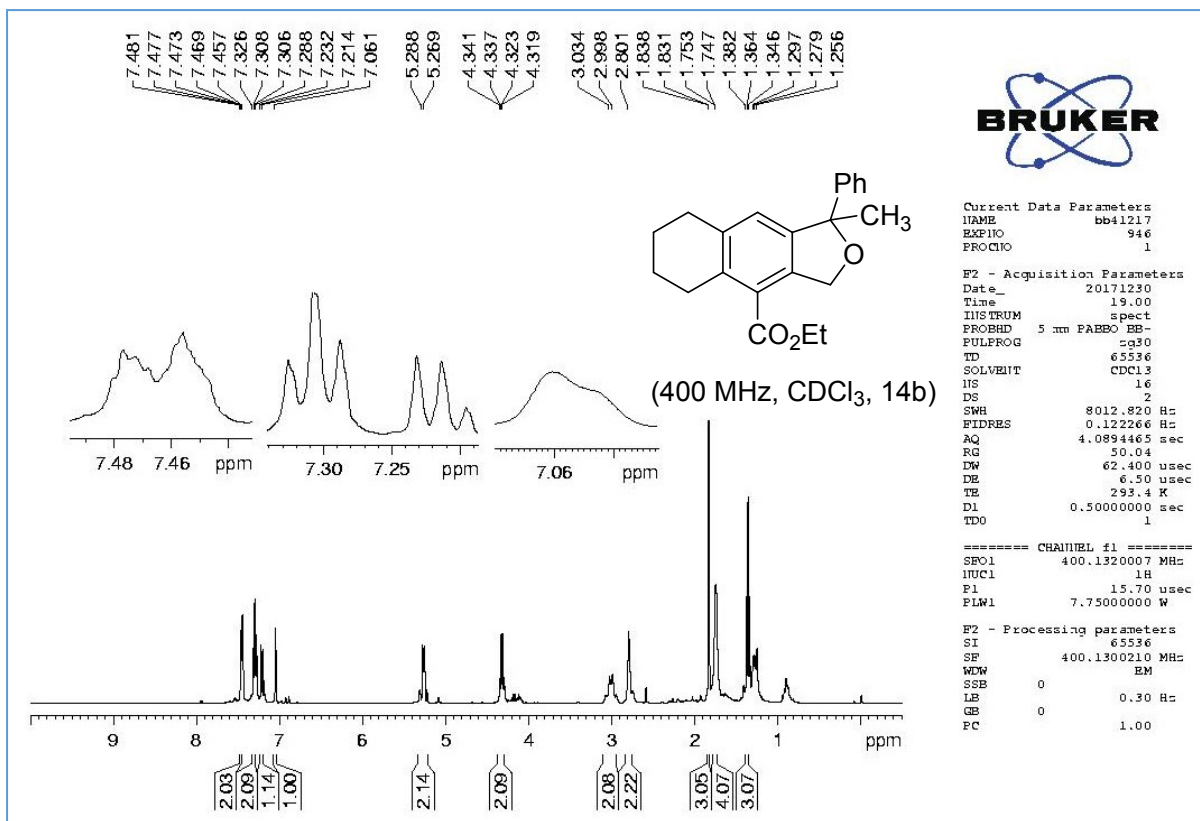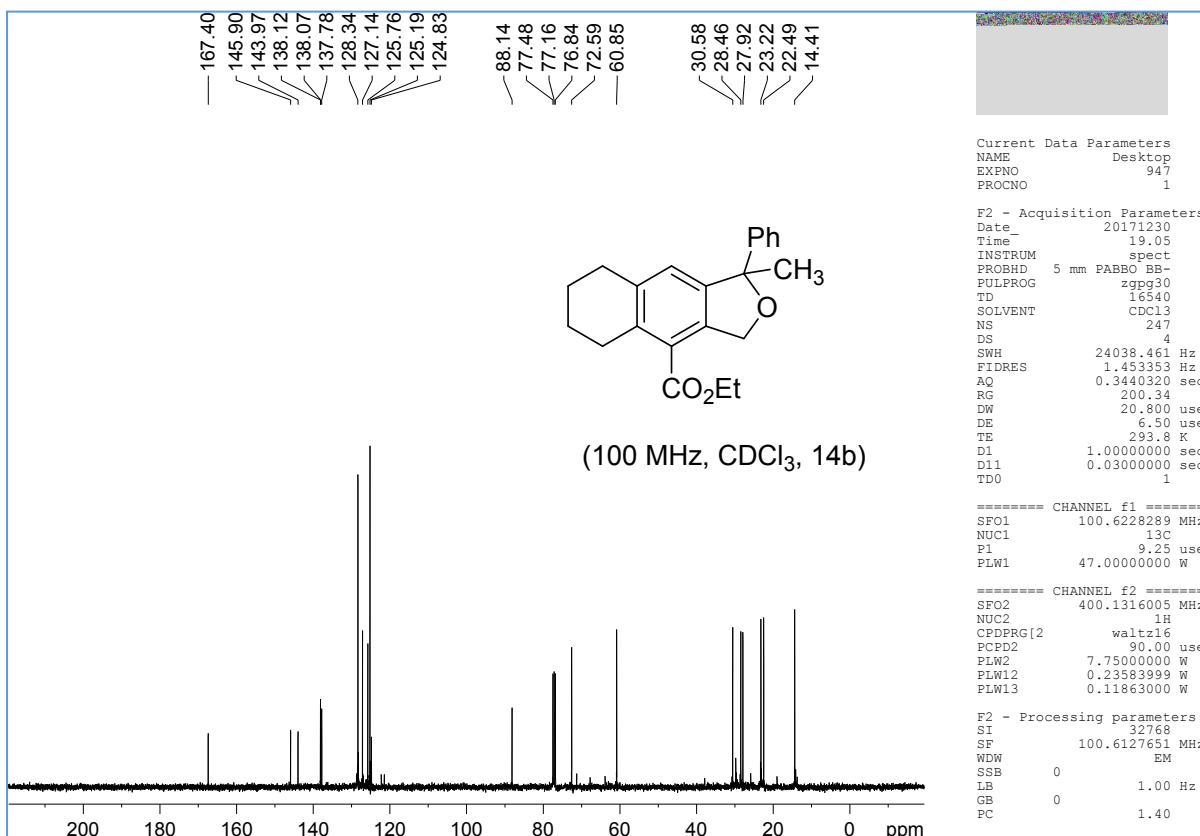

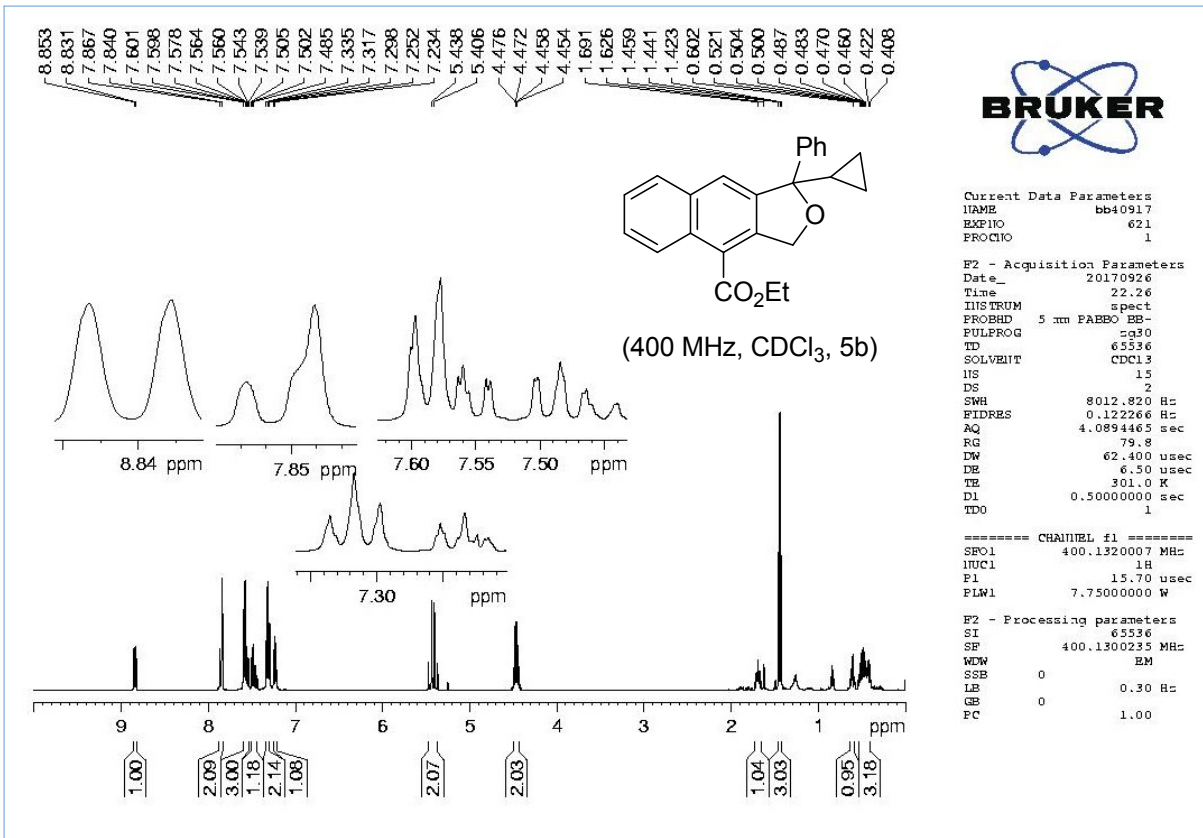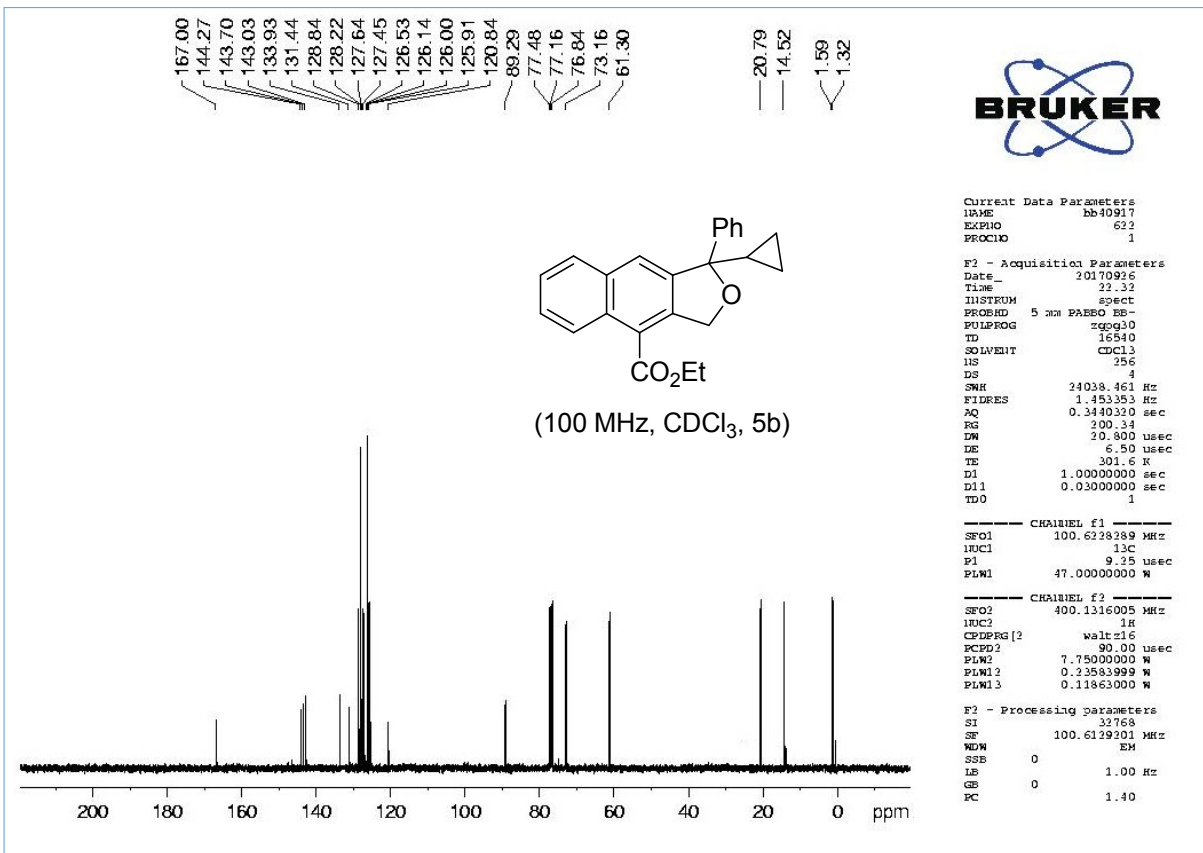

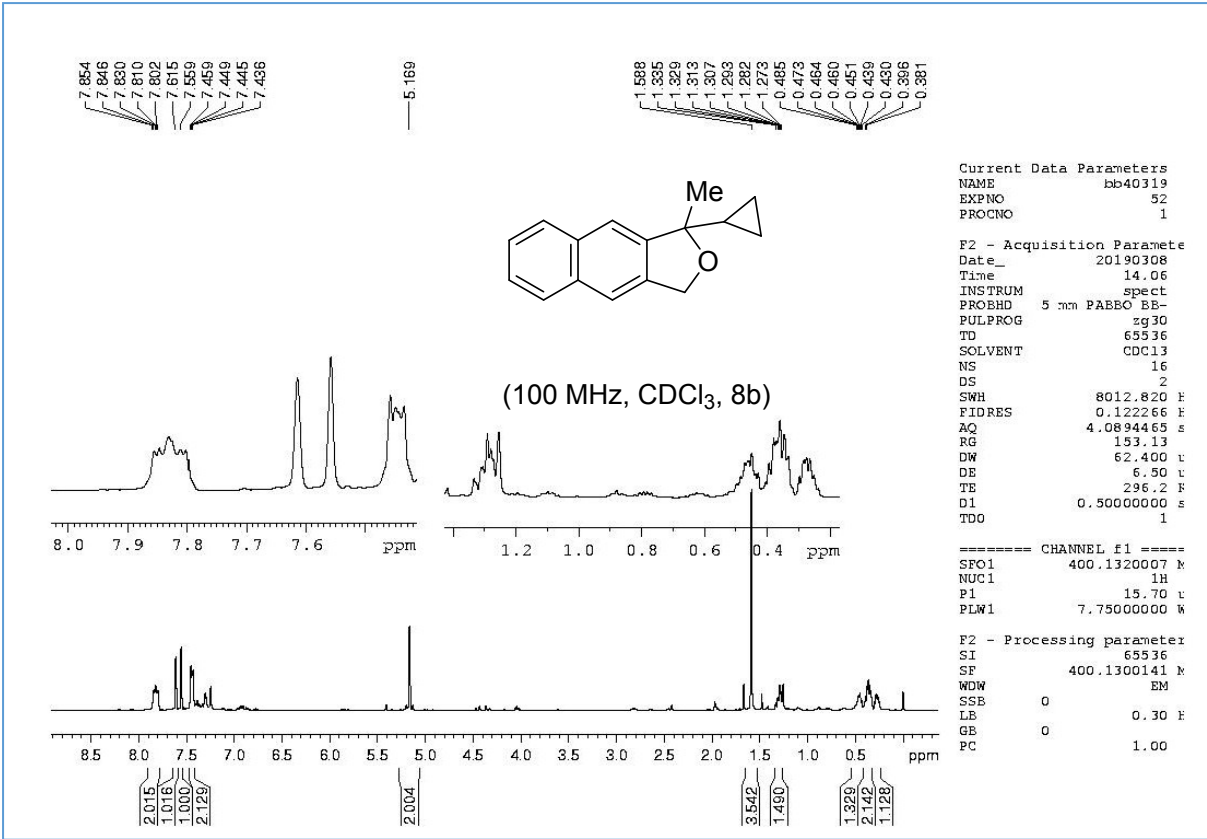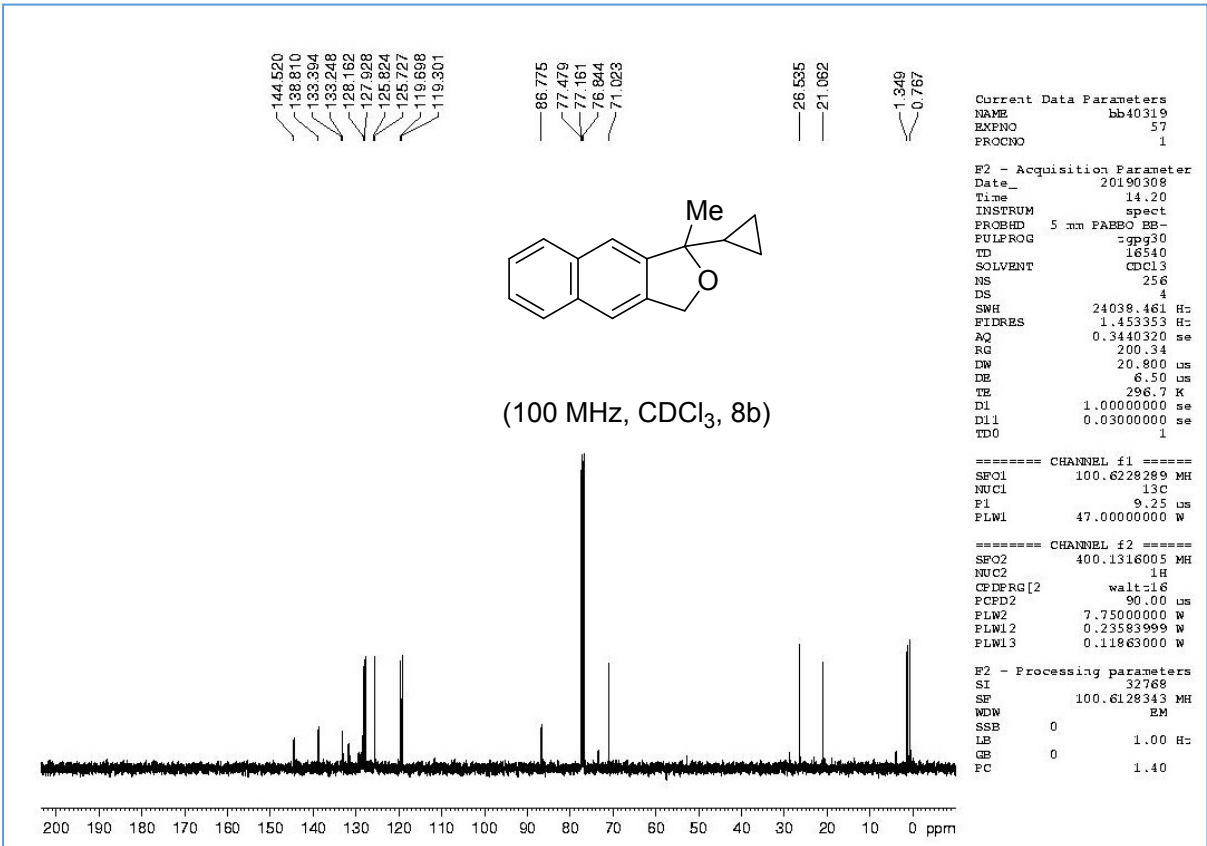

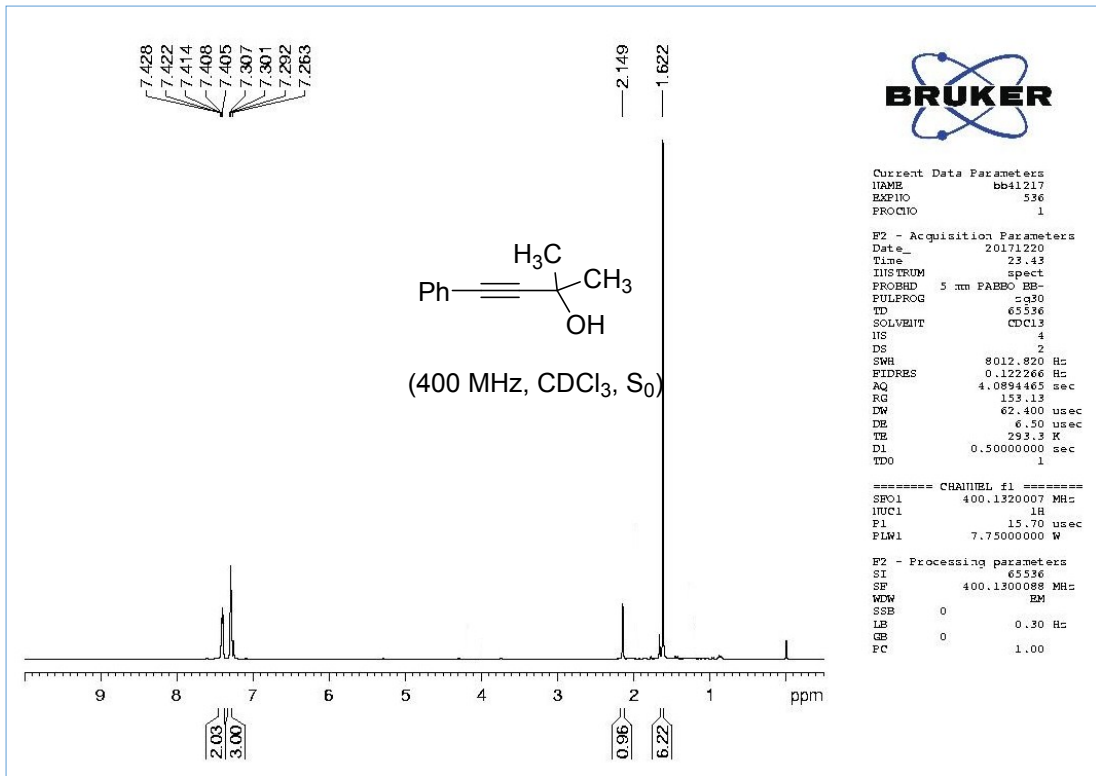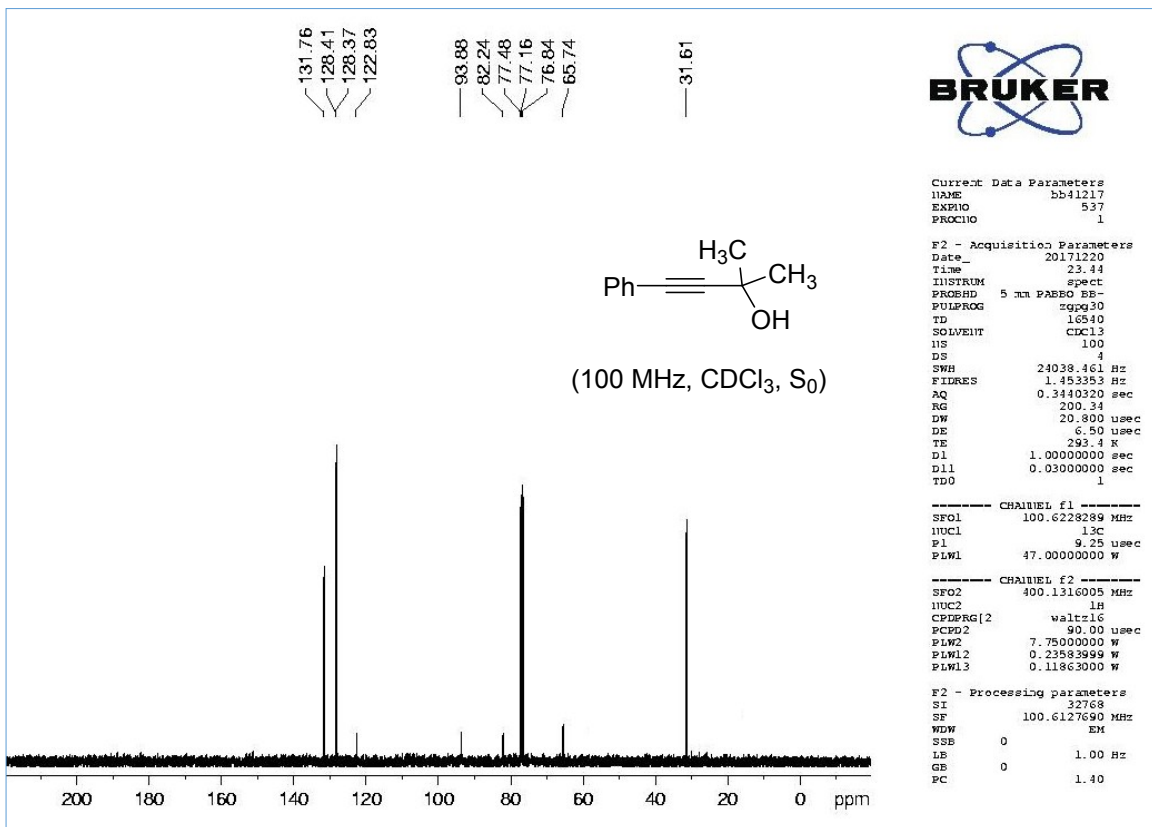

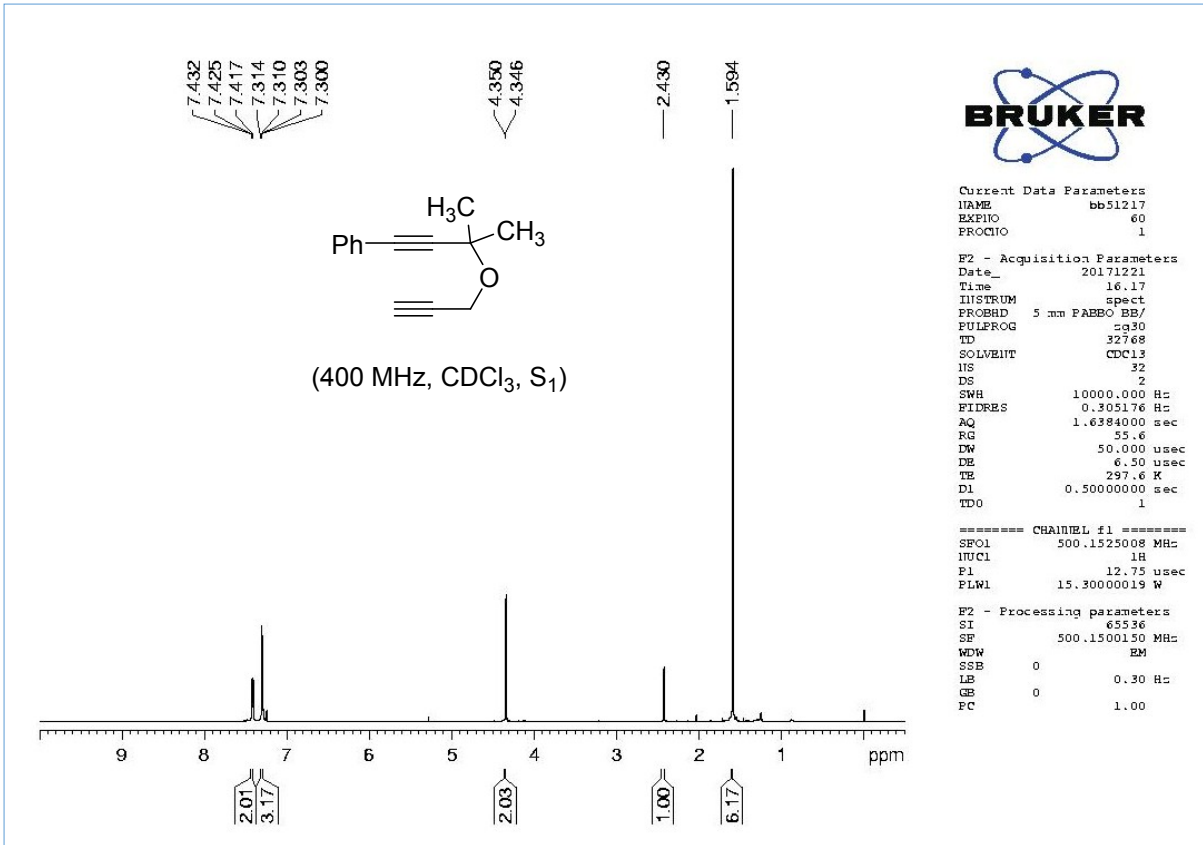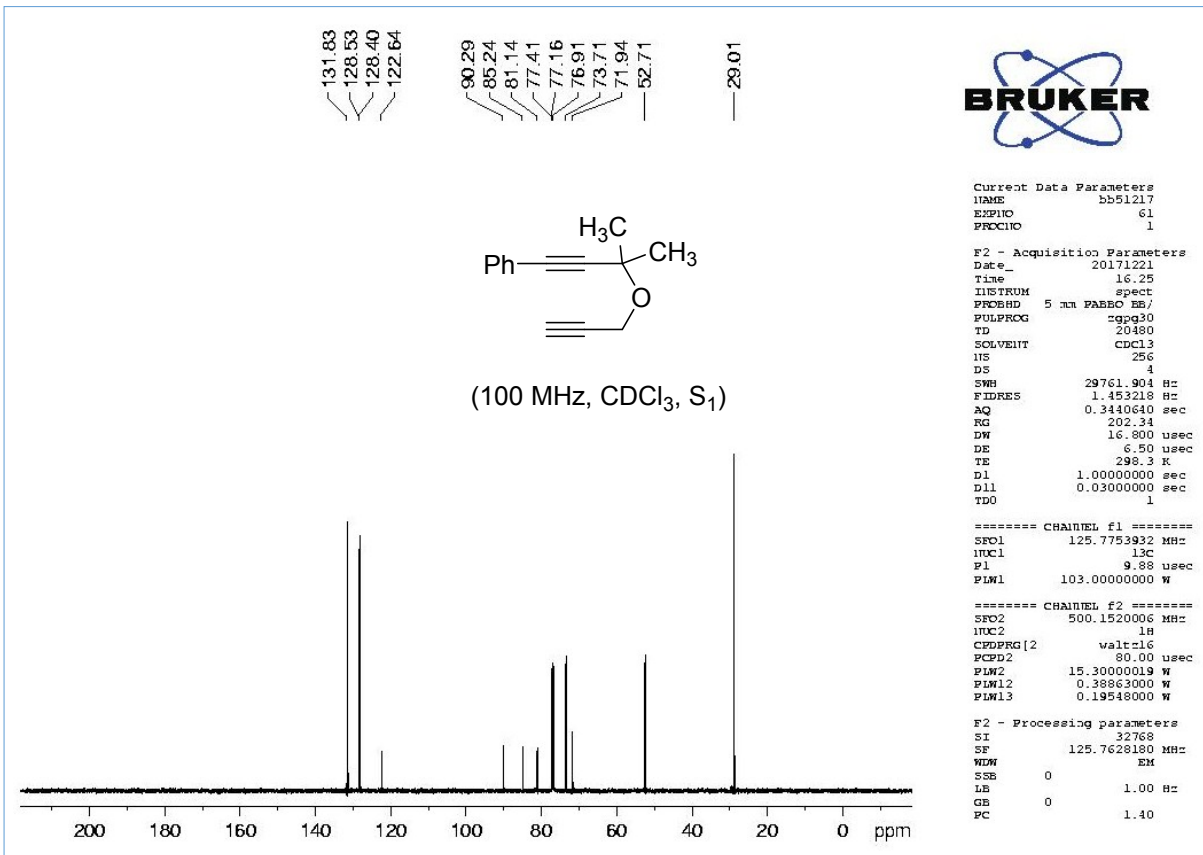



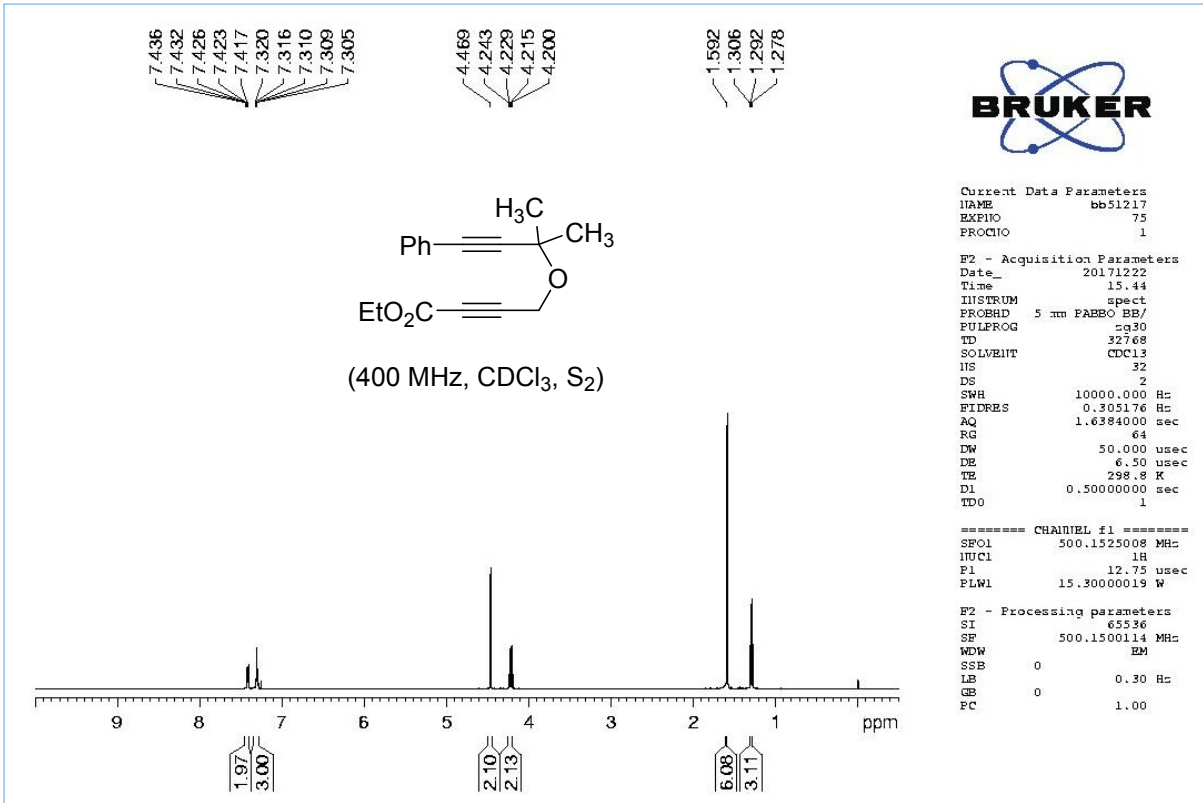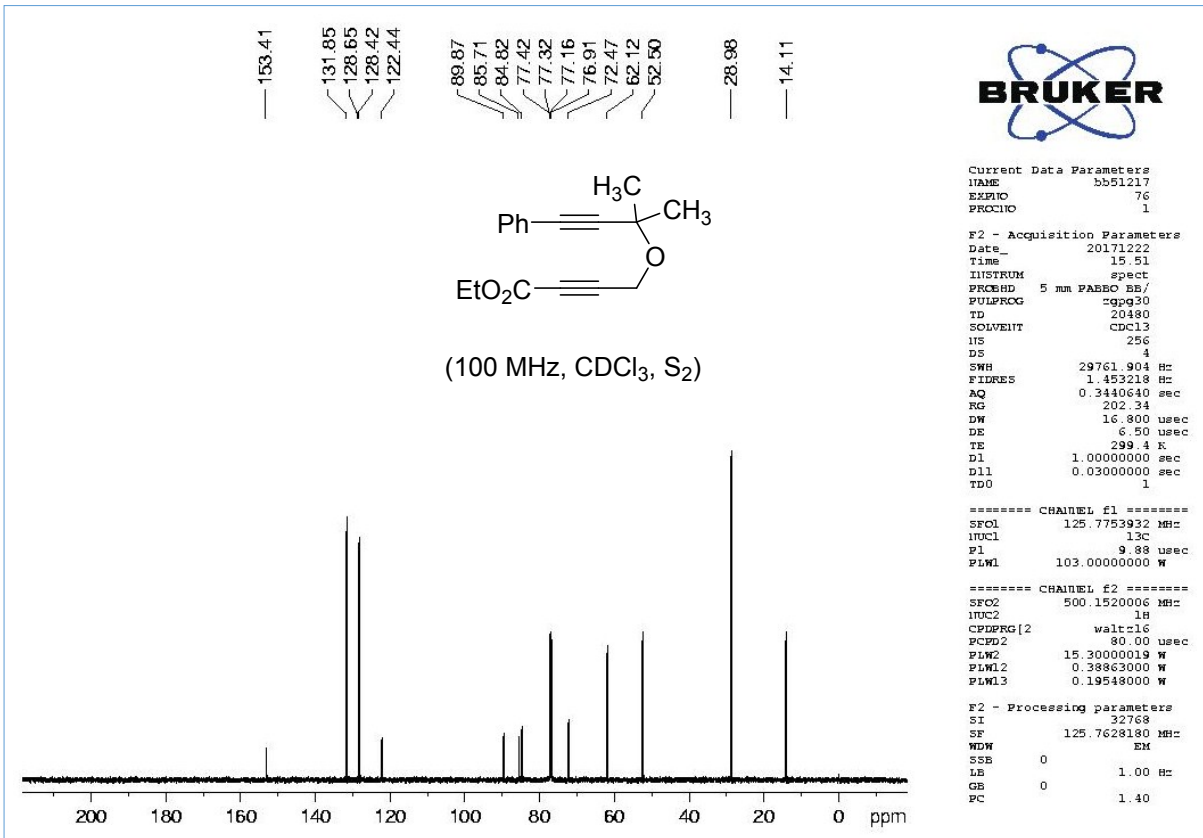

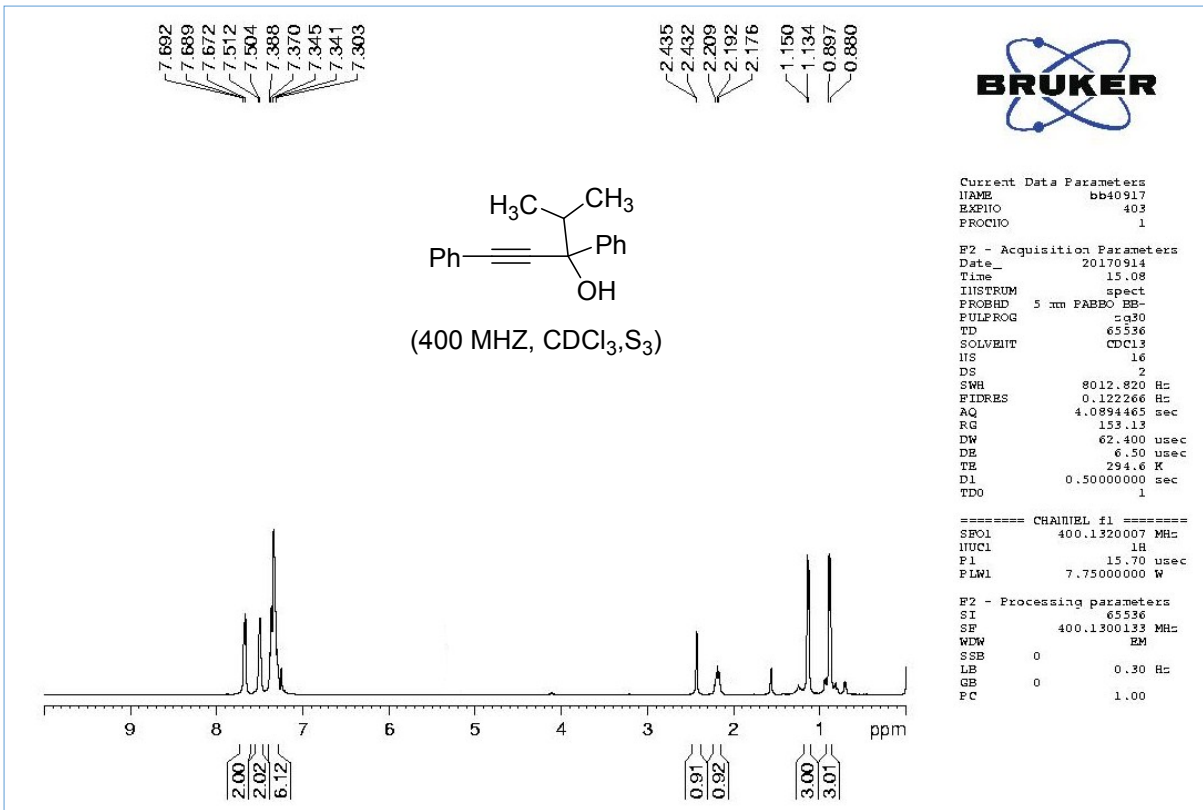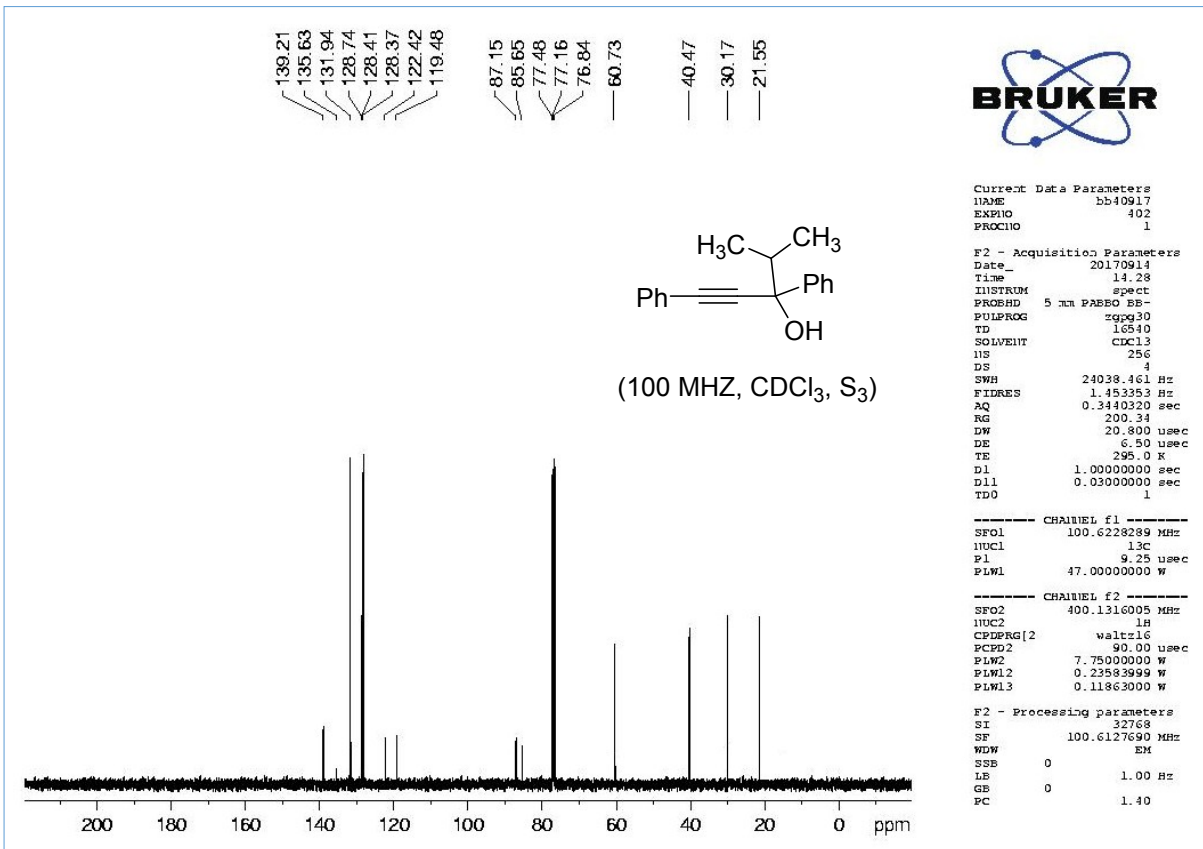

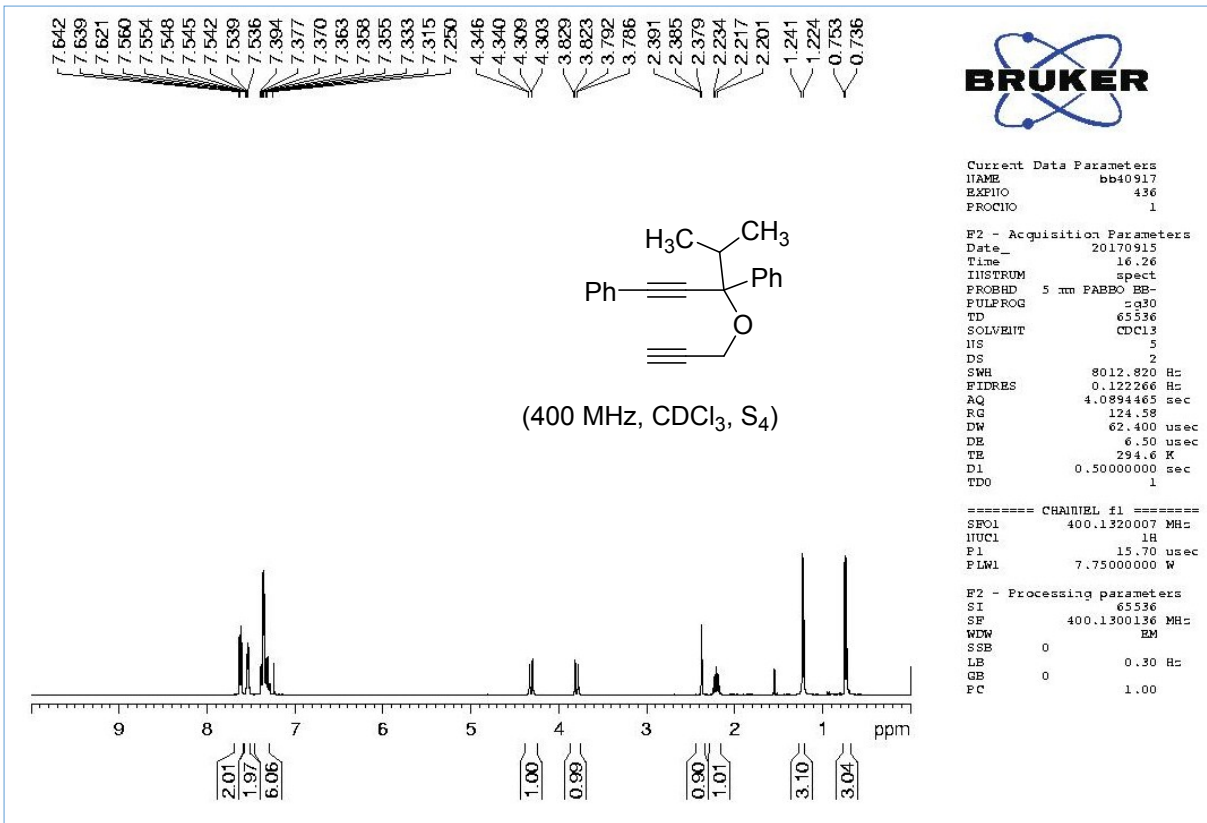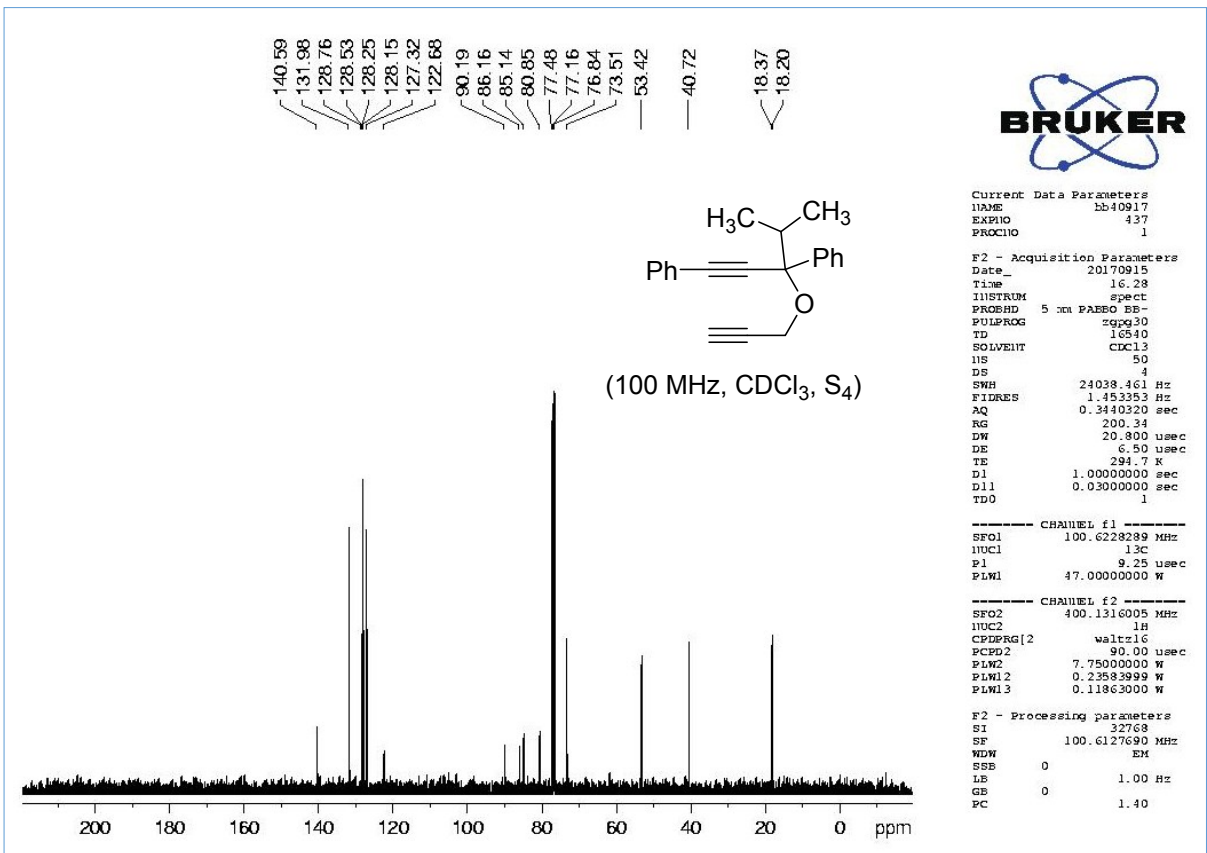

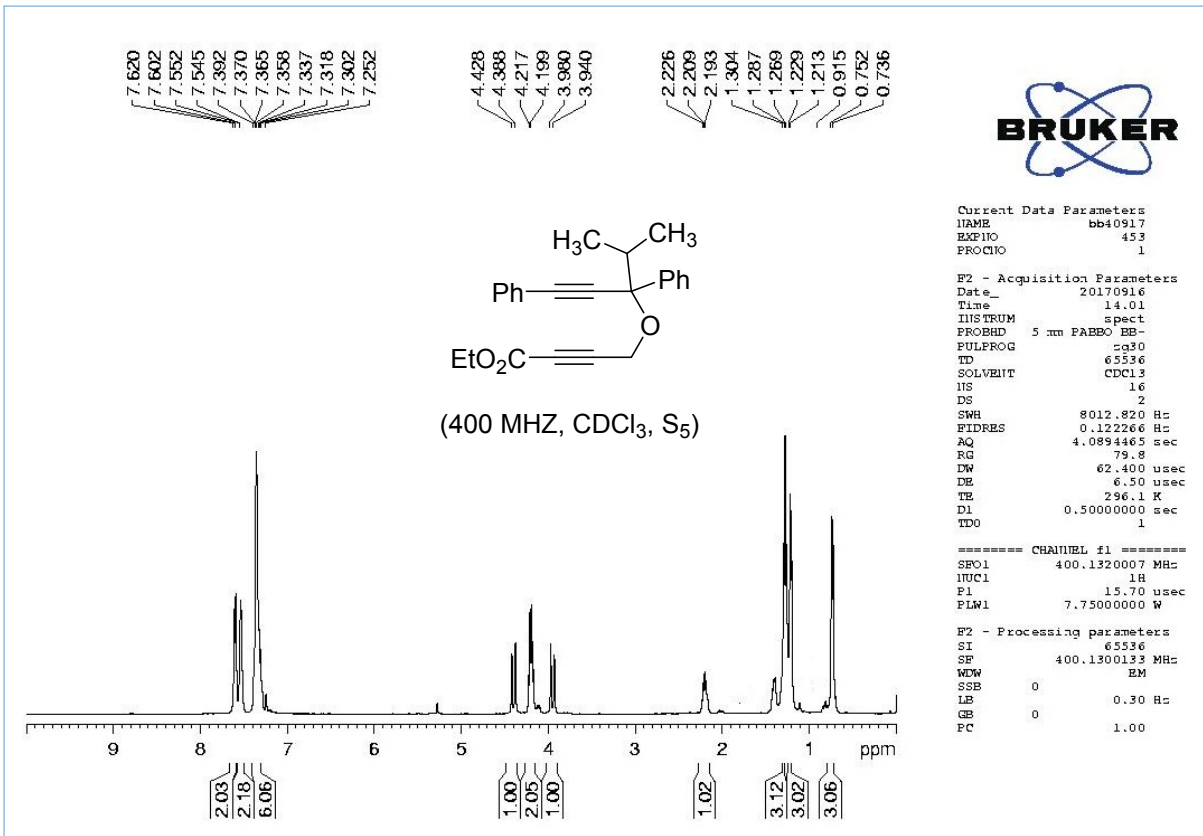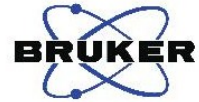

Current Data Parameters  
 NAME bb40917  
 EXPNO 453  
 PROCNO 1

F2 - Acquisition Parameters  
 Date\_ 20170916  
 Time 14.01  
 INSTRUM spect  
 PROBHD 5 mm PABBO BB-  
 PULPROG zg30  
 TD 65536  
 SOLVENT CDCl3  
 NS 16  
 DS 2  
 SWH 8012.820 Hz  
 FIDRES 0.122266 Hz  
 AQ 4.0894465 sec  
 RG 79.8  
 DW 62.400 usec  
 DE 6.50 usec  
 TE 296.1 K  
 D1 0.5000000 sec  
 TDO 1

==== CHANNEL f1 =====  
 SFO1 400.1320007 MHz  
 NUCL1 1H  
 P1 15.70 usec  
 PLW1 7.7500000 W

F2 - Processing parameters  
 SI 65536  
 SF 400.1300139 MHz  
 WDW EM  
 SSB 0  
 LB 0.30 Hz  
 GB 0  
 PC 1.00

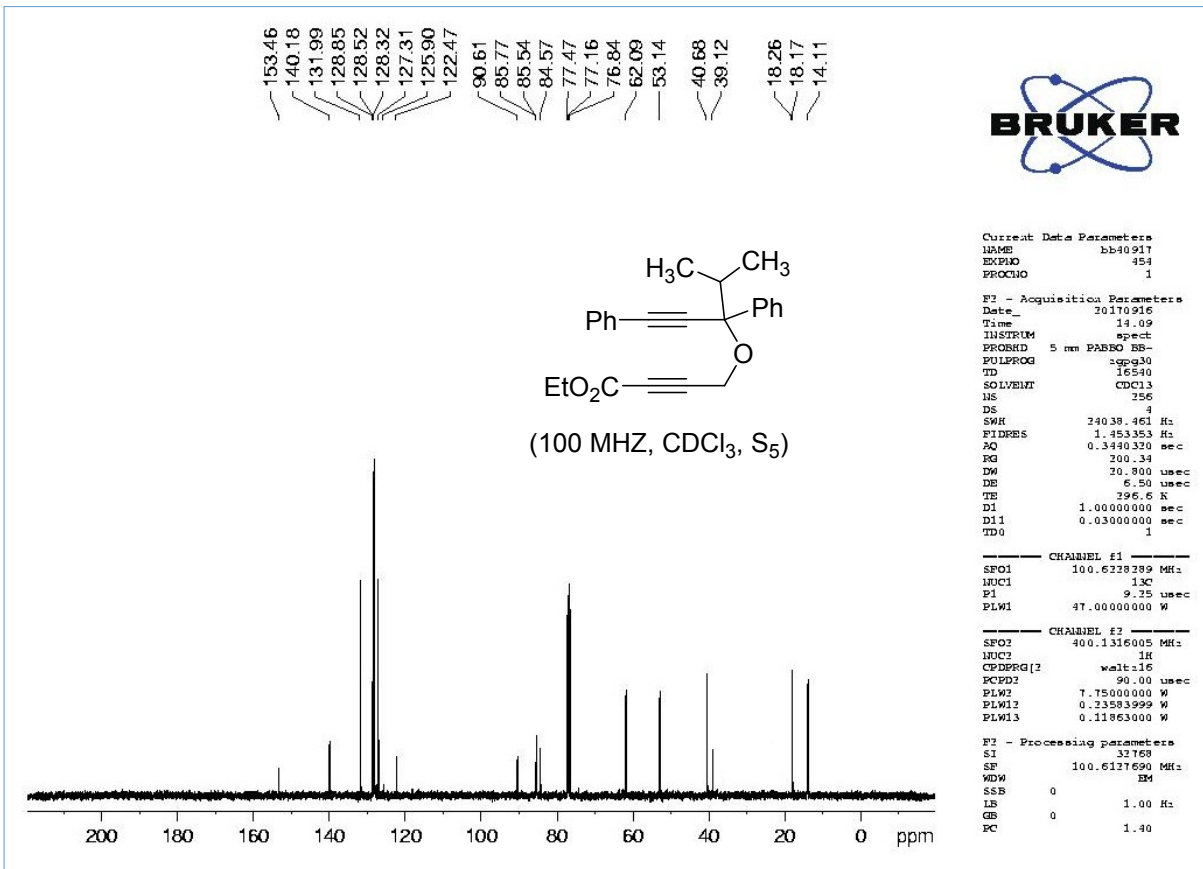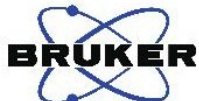

Current Data Parameters  
 NAME bb40917  
 EXPNO 454  
 PROCNO 1

F2 - Acquisition Parameters  
 Date\_ 20170916  
 Time 14.09  
 INSTRUM spect  
 PROBHD 5 mm PABBO BB-  
 PULPROG zgpg30  
 TD 16540  
 SOLVENT CDCl3  
 NS 256  
 DS 4  
 SWH 24039.461 Hz  
 FIDRES 1.453353 Hz  
 AQ 0.3440320 sec  
 RG 200.34  
 DW 70.800 usec  
 DE 6.50 usec  
 TE 296.6 K  
 D1 1.0000000 sec  
 D11 0.0300000 sec  
 TDO 1

==== CHANNEL f1 =====  
 SFO1 100.6238289 MHz  
 NUCL1 13C  
 P1 9.25 usec  
 PLW1 47.0000000 W

==== CHANNEL f2 =====  
 SFO2 400.1316005 MHz  
 NUCL2 1H  
 CPDPRG2 waltz16  
 PCPD2 90.00 usec  
 PLW2 7.7500000 W  
 PLW12 0.23583999 W  
 PLW13 0.11863000 W

F2 - Processing parameters  
 SI 32768  
 SF 100.6127690 MHz  
 WDW EM  
 SSB 0  
 LB 1.00 Hz  
 GB 0  
 PC 1.40

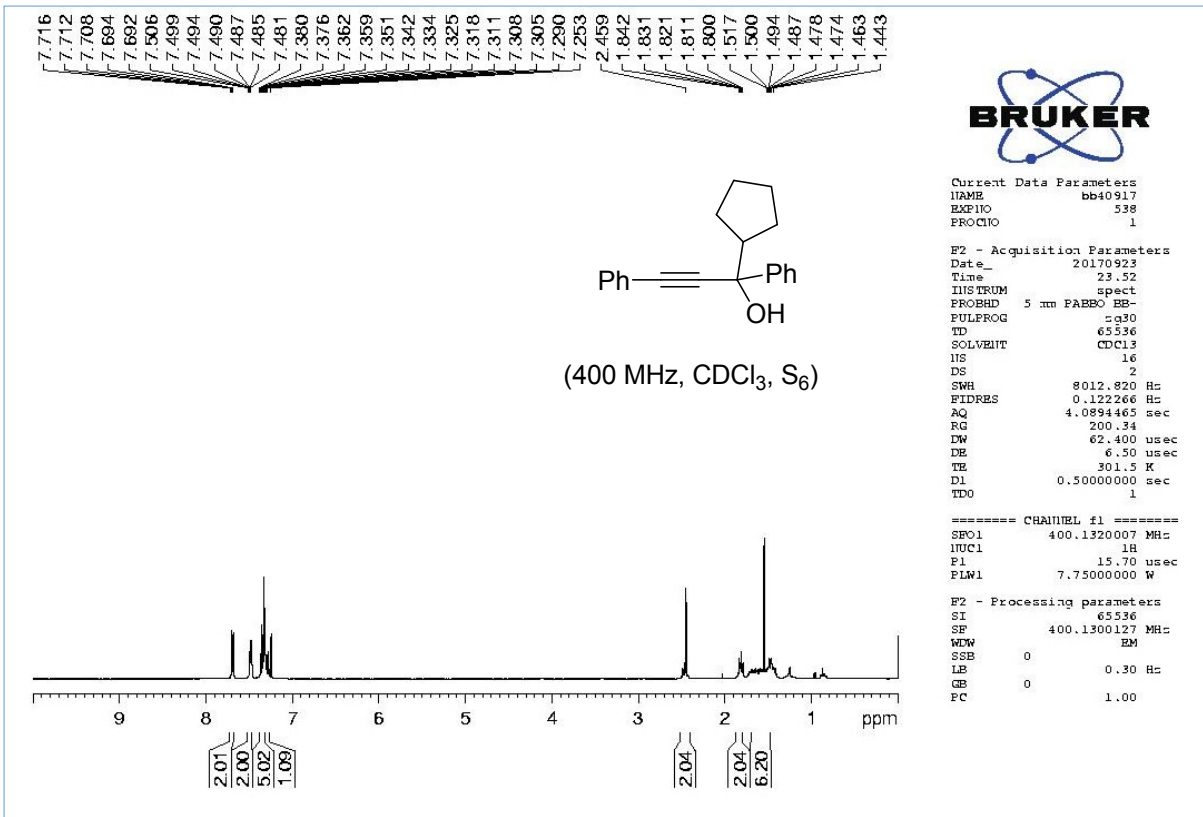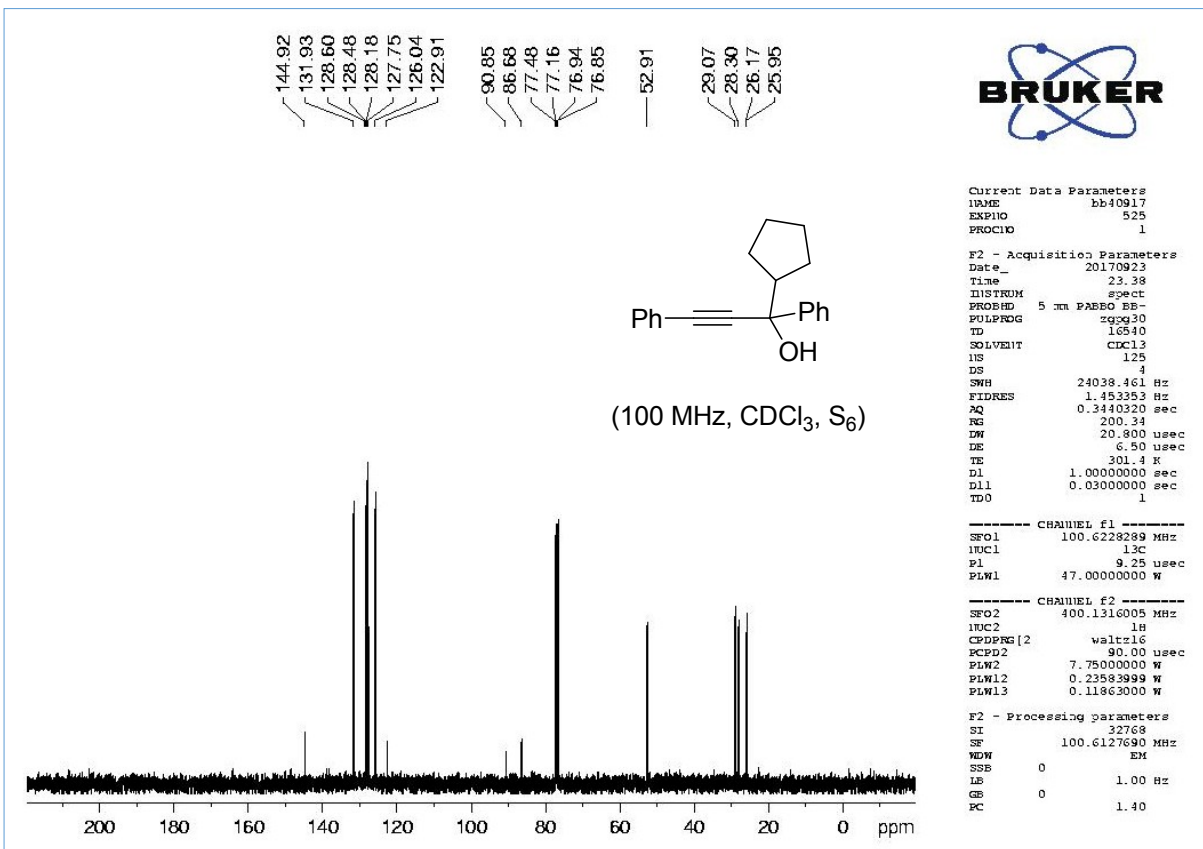

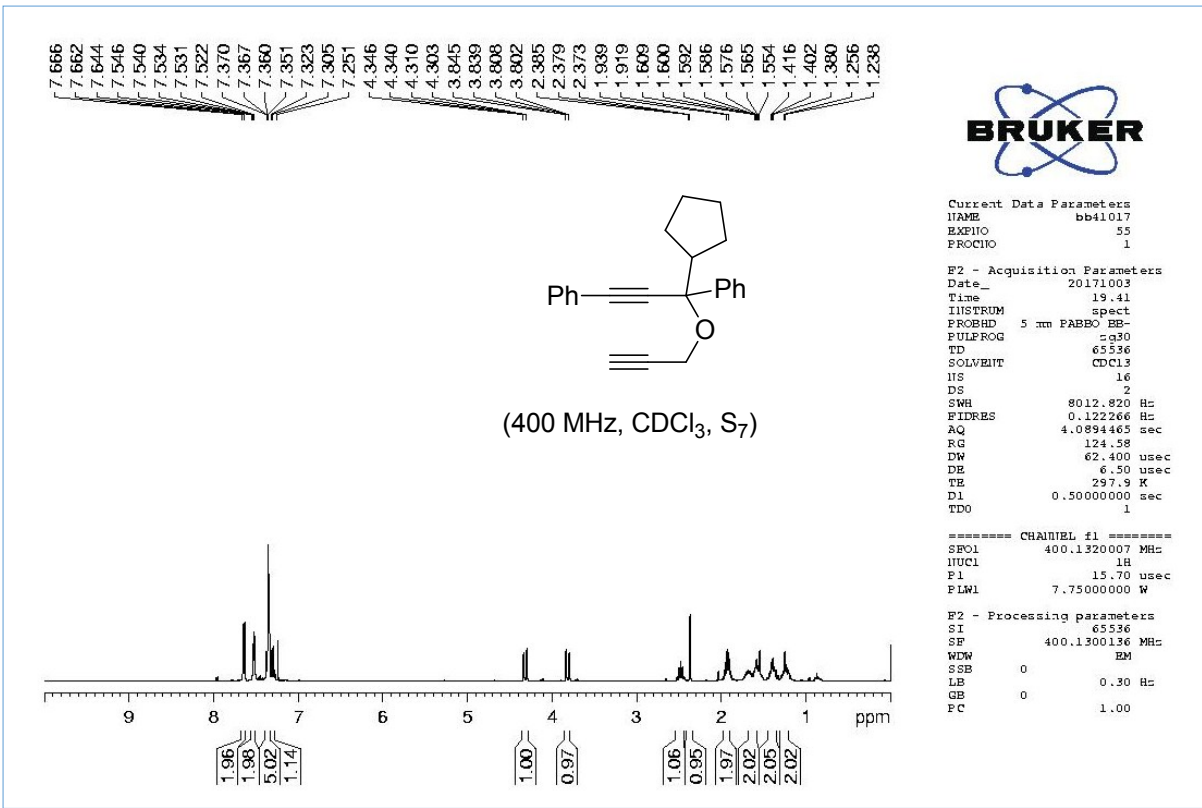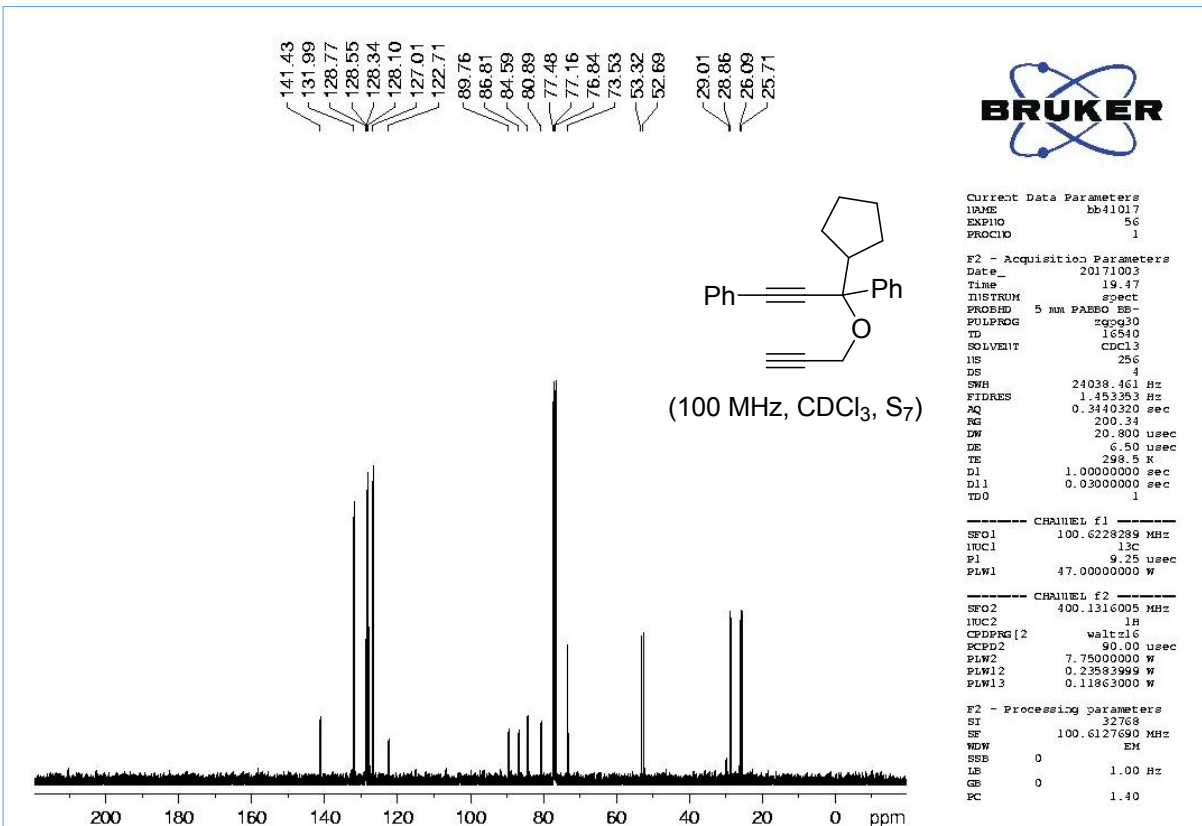



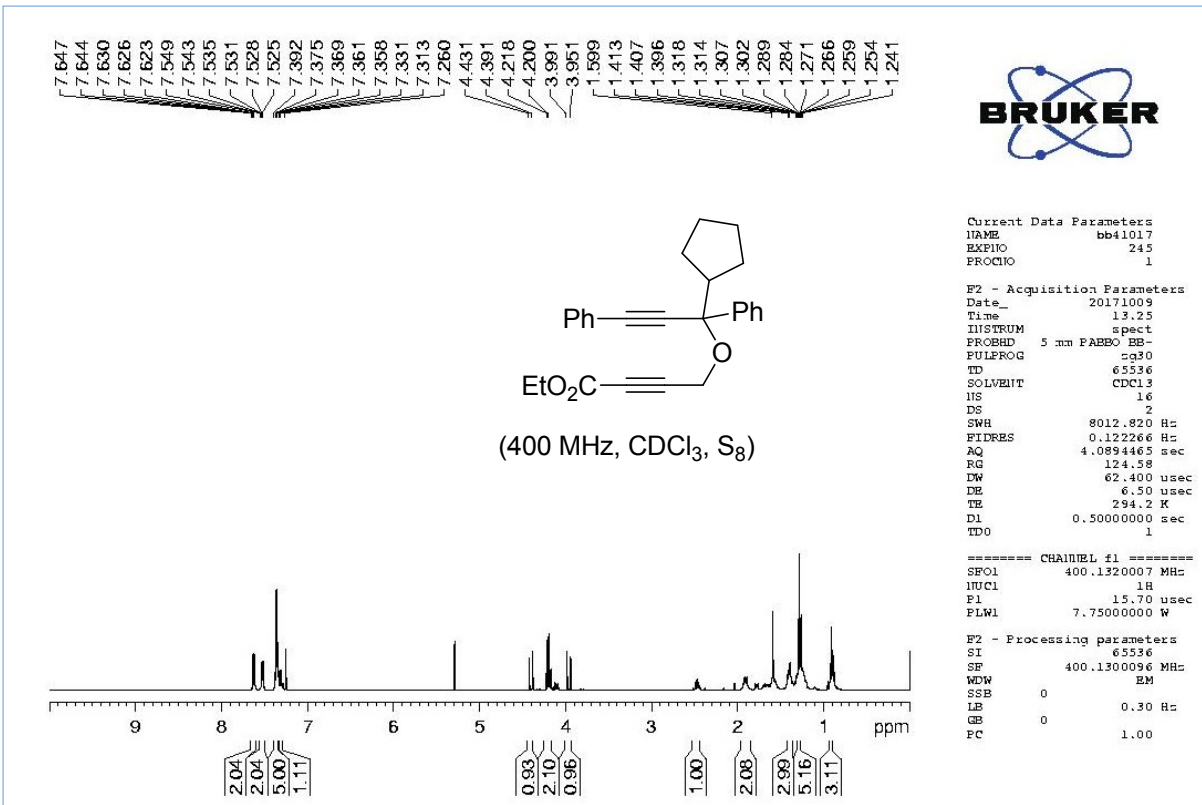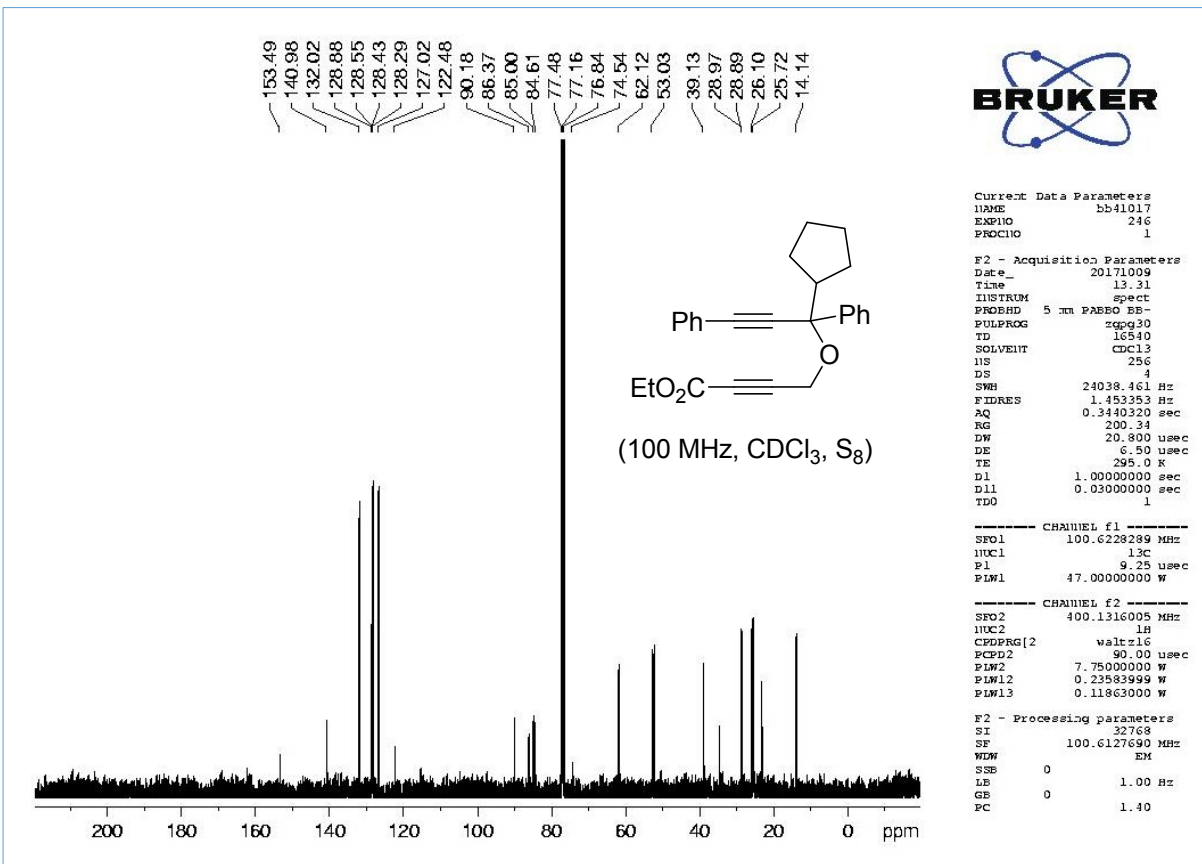

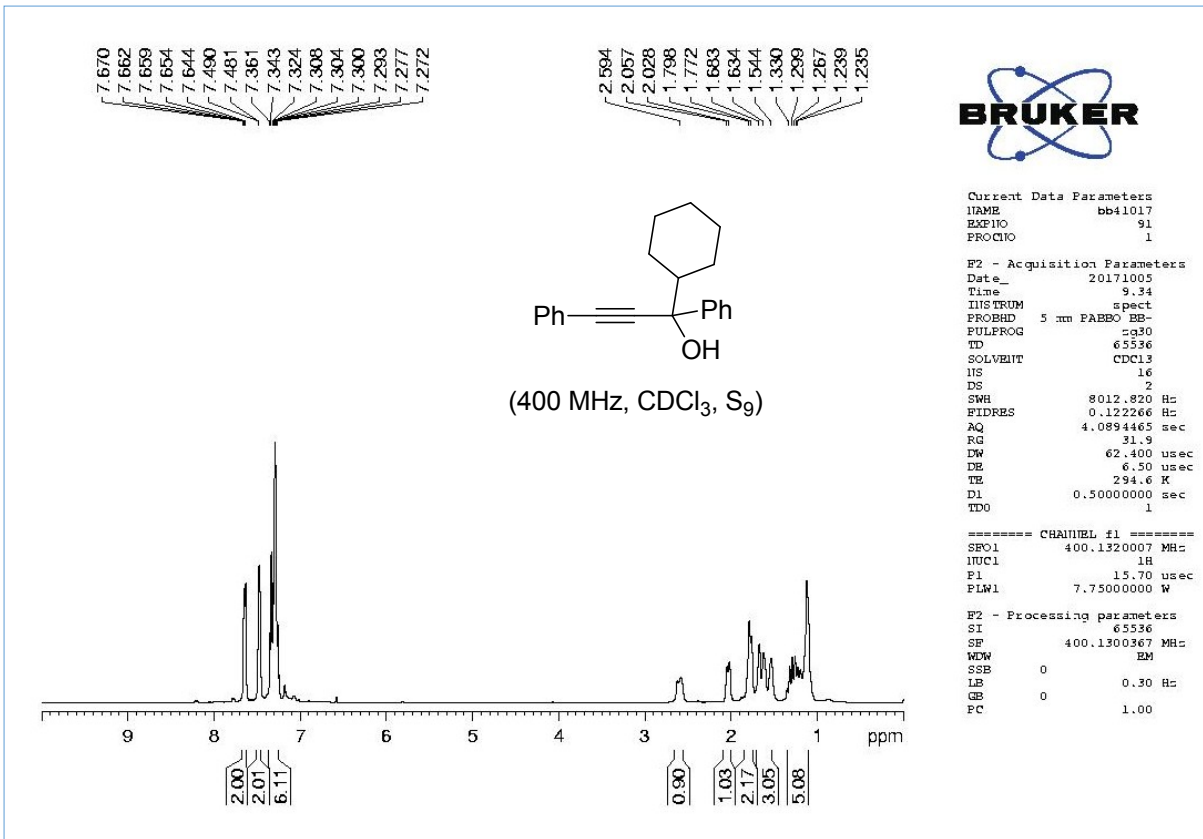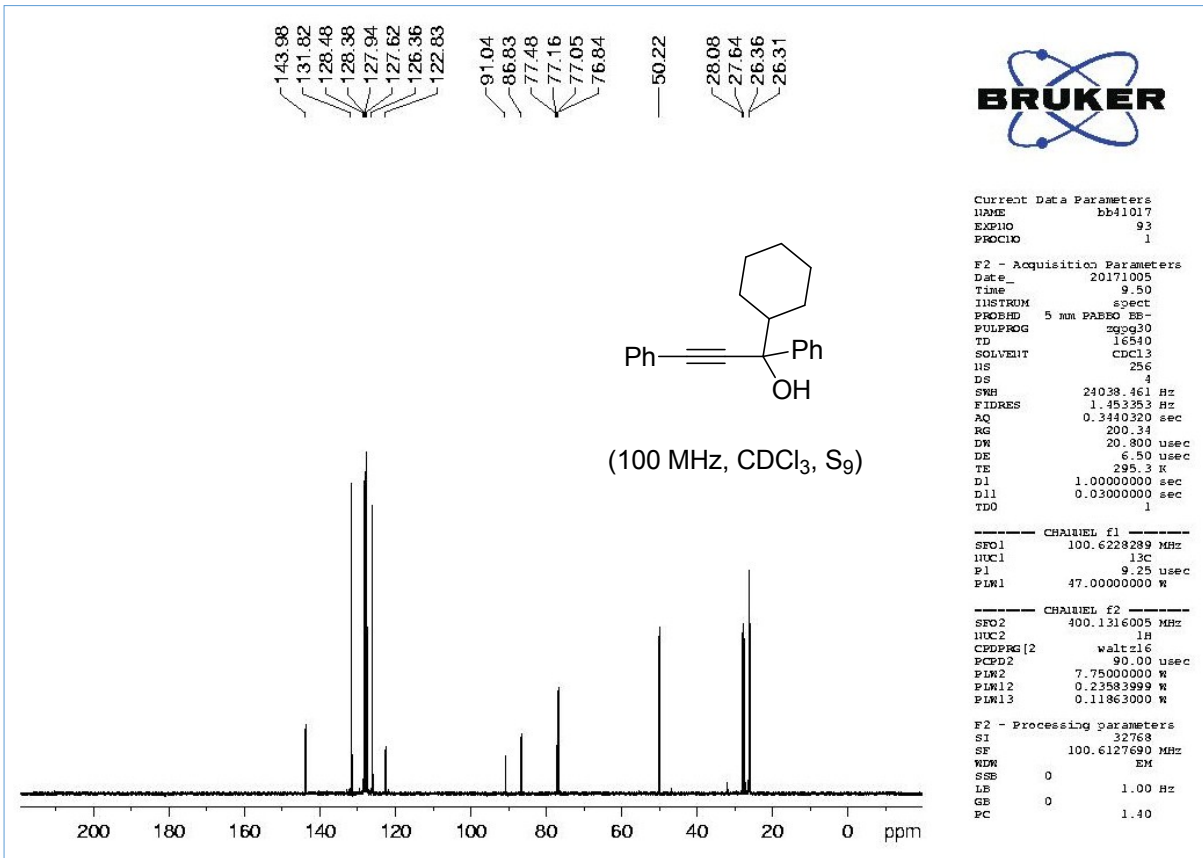

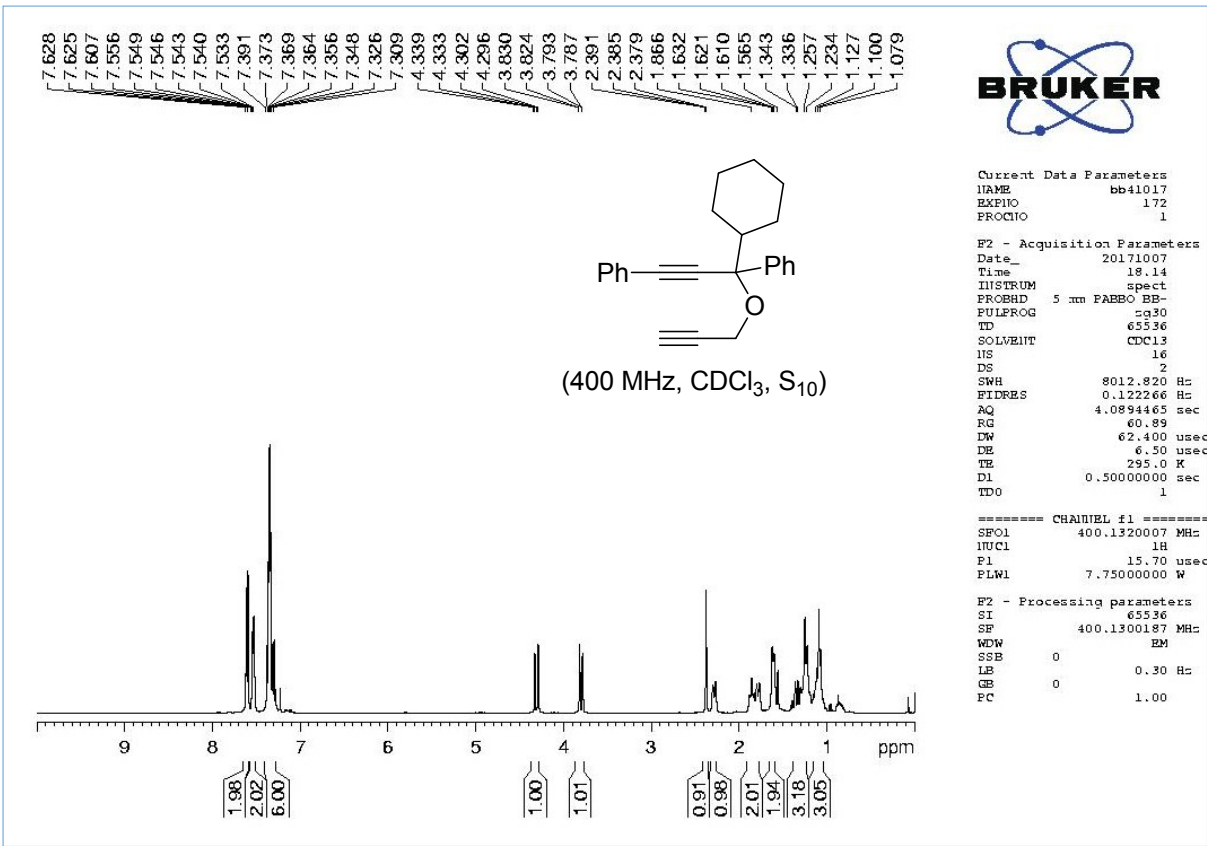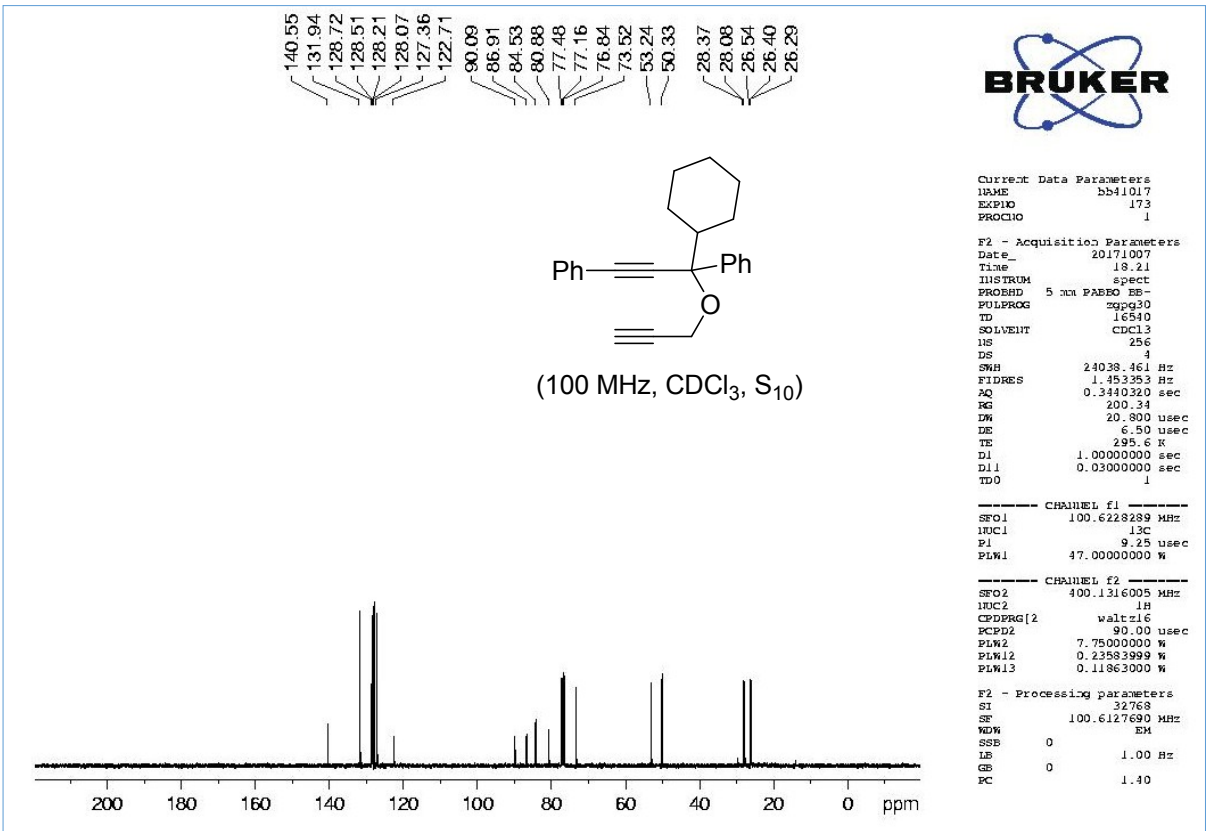

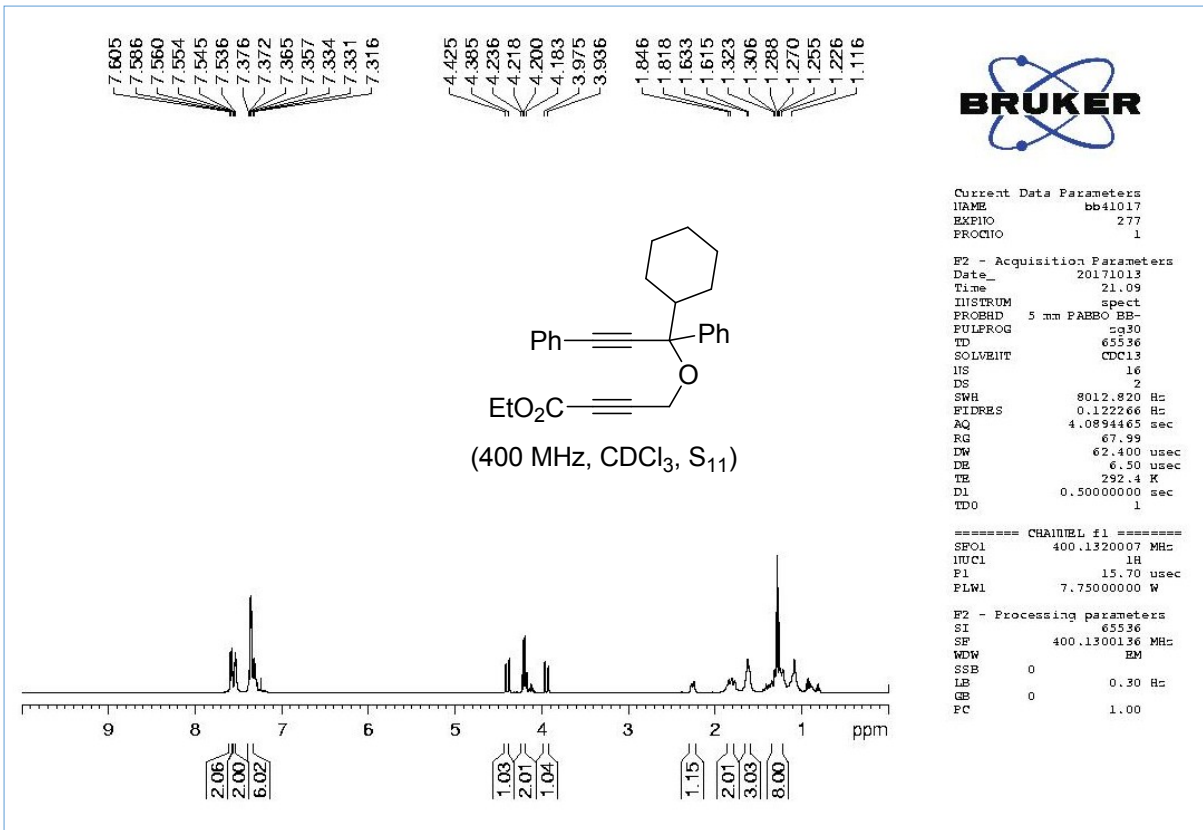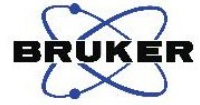

Current Data Parameters  
 NAME bb41017  
 EXPNO 277  
 PROCNO 1

F2 - Acquisition Parameters  
 Date\_ 20171013  
 Time 21.09  
 INSTRUM spect  
 PROBHD 5 mm PABBO BB-  
 PULPROG zg30  
 TD 65536  
 SOLVENT CDC13  
 NS 16  
 DS 2  
 SWH 8012.820 Hz  
 FIDRES 0.122266 Hz  
 AQ 4.0894465 sec  
 RG 67.99  
 DW 62.400 usec  
 DE 6.50 usec  
 TE 292.4 K  
 D1 0.50000000 sec  
 TDO 1

===== CHANNEL f1 =====  
 SFO1 400.1320007 MHz  
 NUC1 1H  
 P1 15.70 usec  
 PLW1 7.75000000 W

F2 - Processing parameters  
 SI 65536  
 SF 400.1300136 MHz  
 WDW EM  
 SSB 0  
 LB 0.30 Hz  
 GB 0  
 FC 1.00

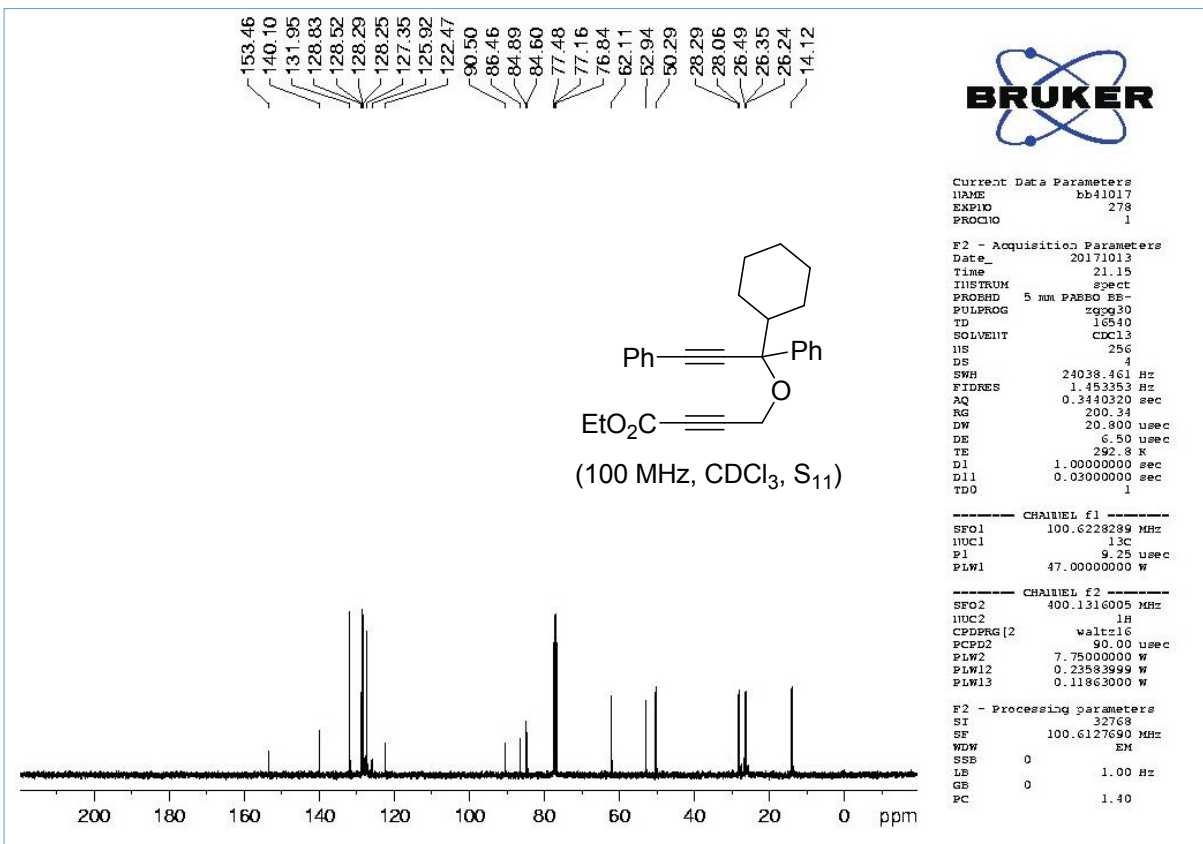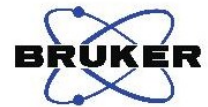

Current Data Parameters  
 NAME bb41017  
 EXPNO 277  
 PROCNO 1

F2 - Acquisition Parameters  
 Date\_ 20171013  
 Time 21.15  
 INSTRUM spect  
 PROBHD 5 mm PABBO BB-  
 PULPROG zgpg30  
 TD 16540  
 SOLVENT CDC13  
 NS 256  
 DS 4  
 SWH 24038.461 Hz  
 FIDRES 1.453353 Hz  
 AQ 0.3440320 sec  
 RG 200.34  
 DW 20.800 usec  
 DE 6.50 usec  
 TE 292.8 K  
 D1 1.00000000 sec  
 D11 0.03000000 sec  
 TDO 1

----- CHANNEL f1 -----  
 SFO1 100.6228289 MHz  
 NUC1 13C  
 P1 9.25 usec  
 PLW1 47.00000000 W

----- CHANNEL f2 -----  
 SFO2 400.1316005 MHz  
 NUC2 1H  
 CPDPRG[2] waltz16  
 PCPD2 90.00 usec  
 PLW2 7.75000000 W  
 PLW12 0.23583999 W  
 PLW13 0.11863000 W

F2 - Processing parameters  
 SI 32768  
 SF 100.6127690 MHz  
 WDW EM  
 SSB 0  
 LB 1.00 Hz  
 GB 0  
 PC 1.40

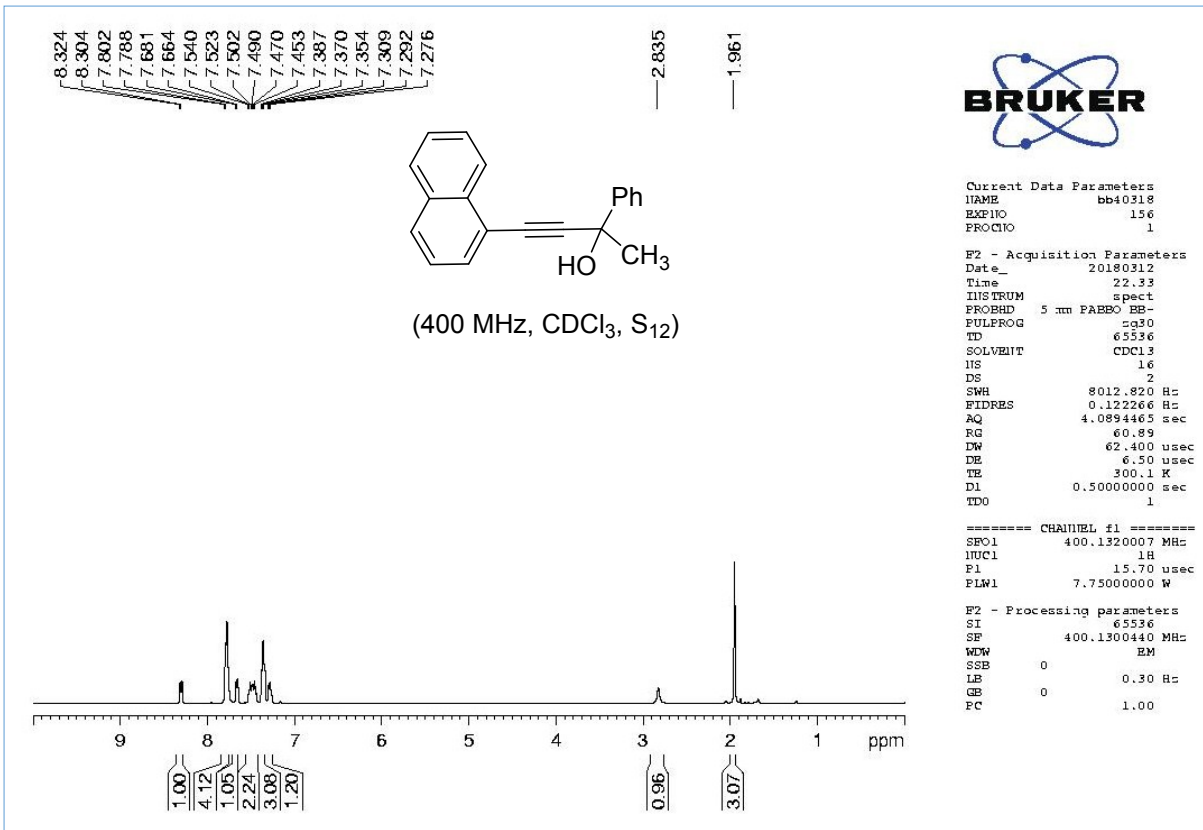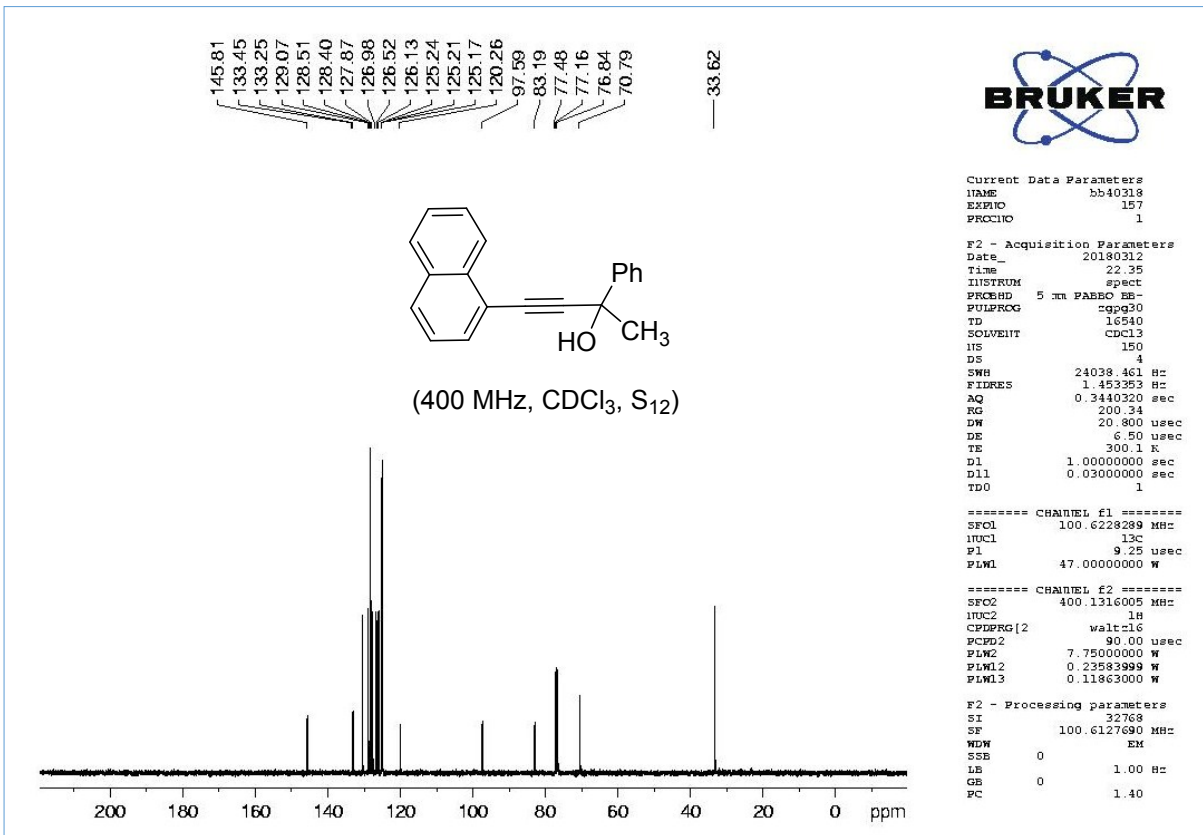

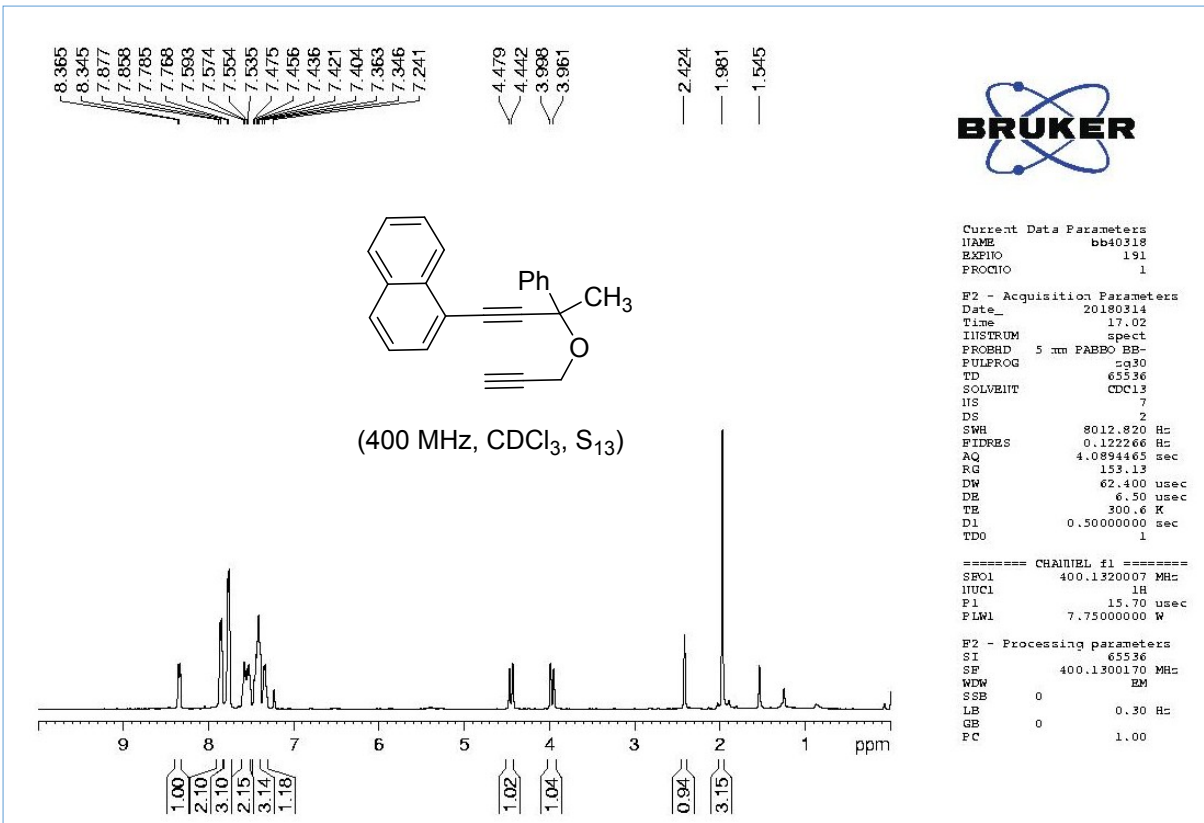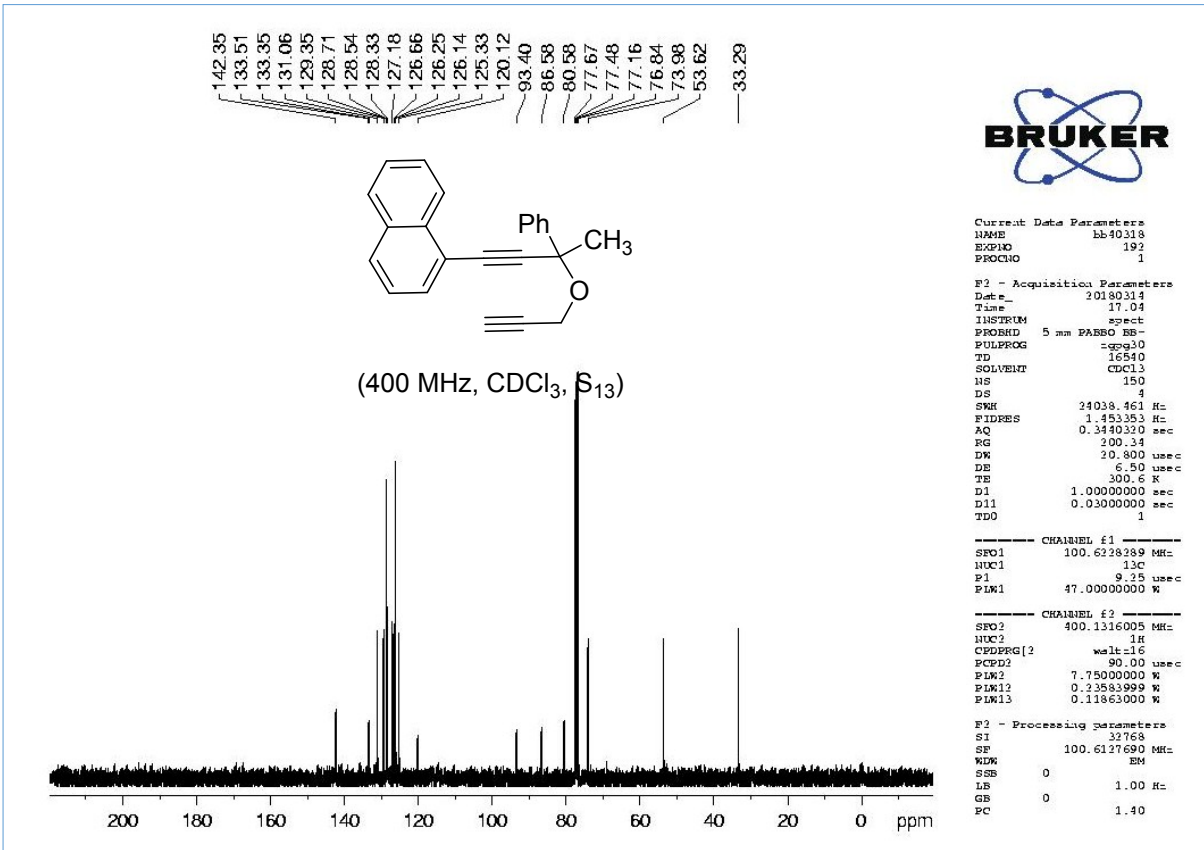



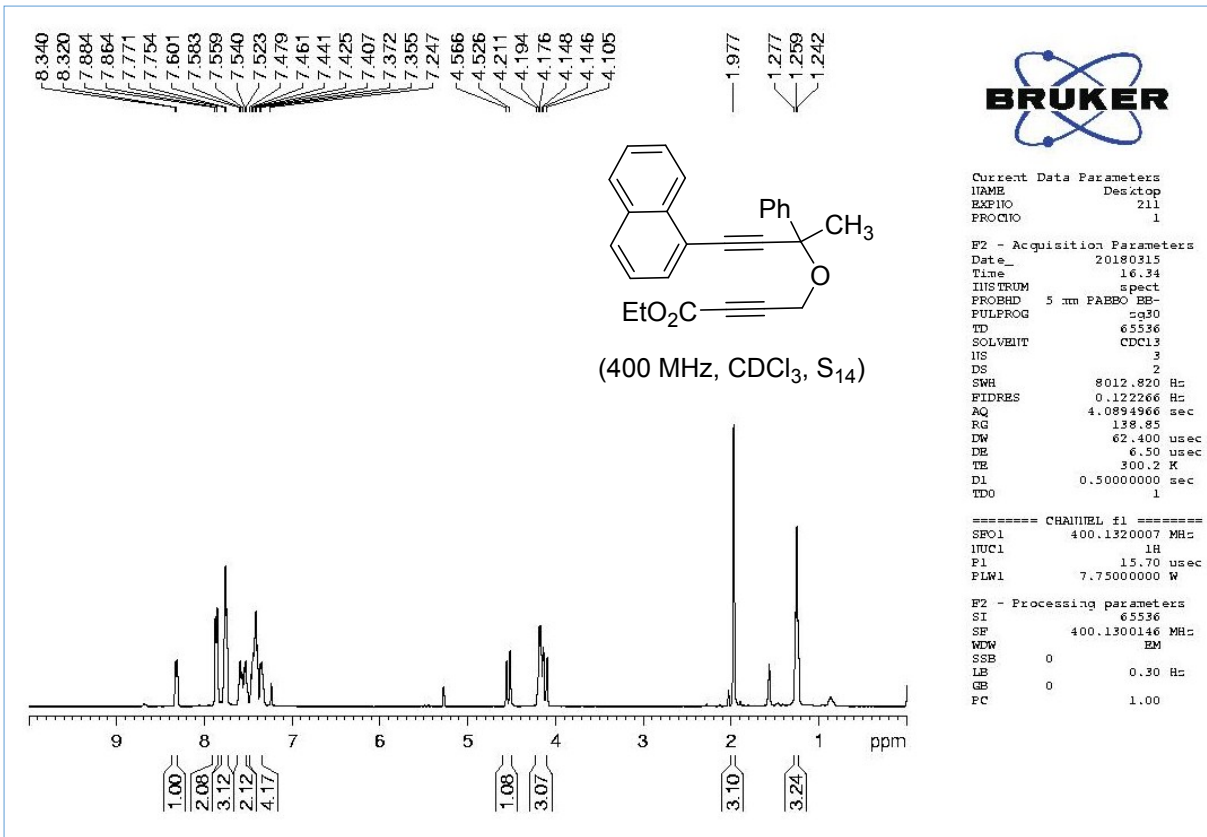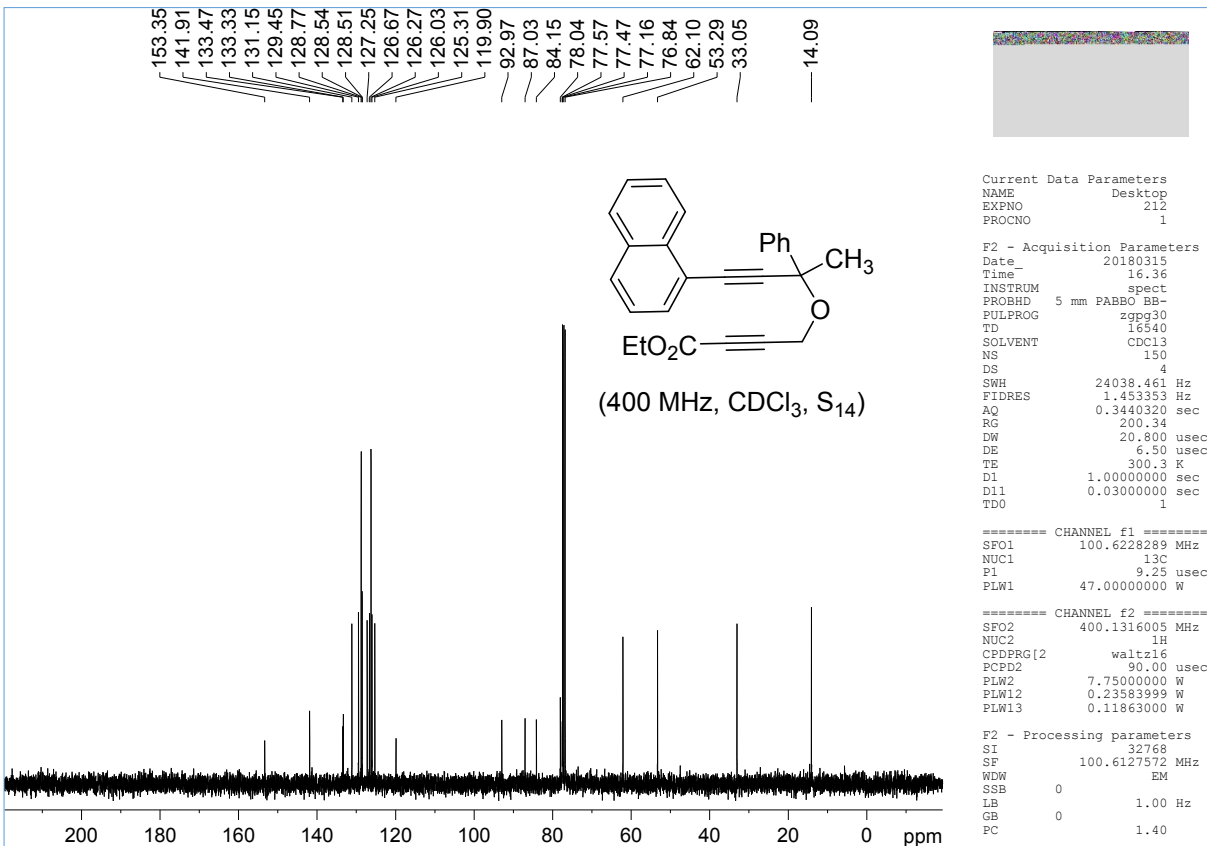

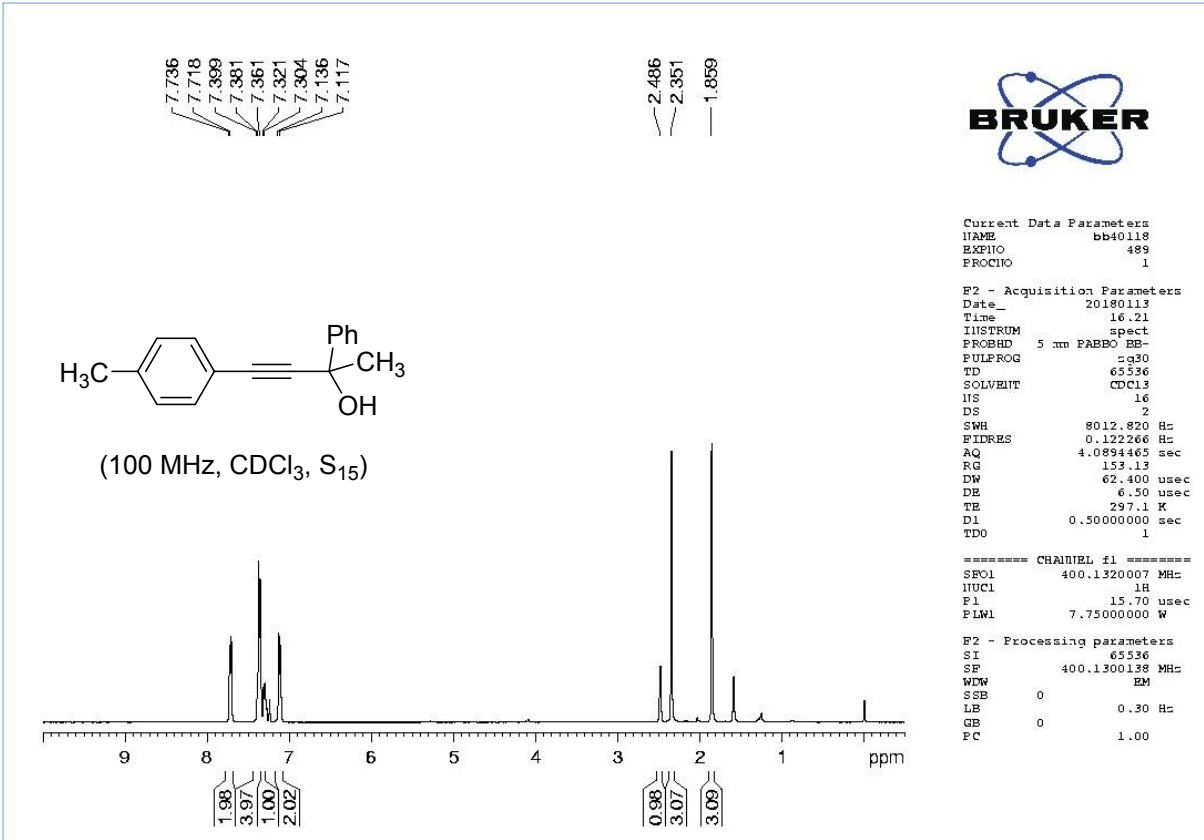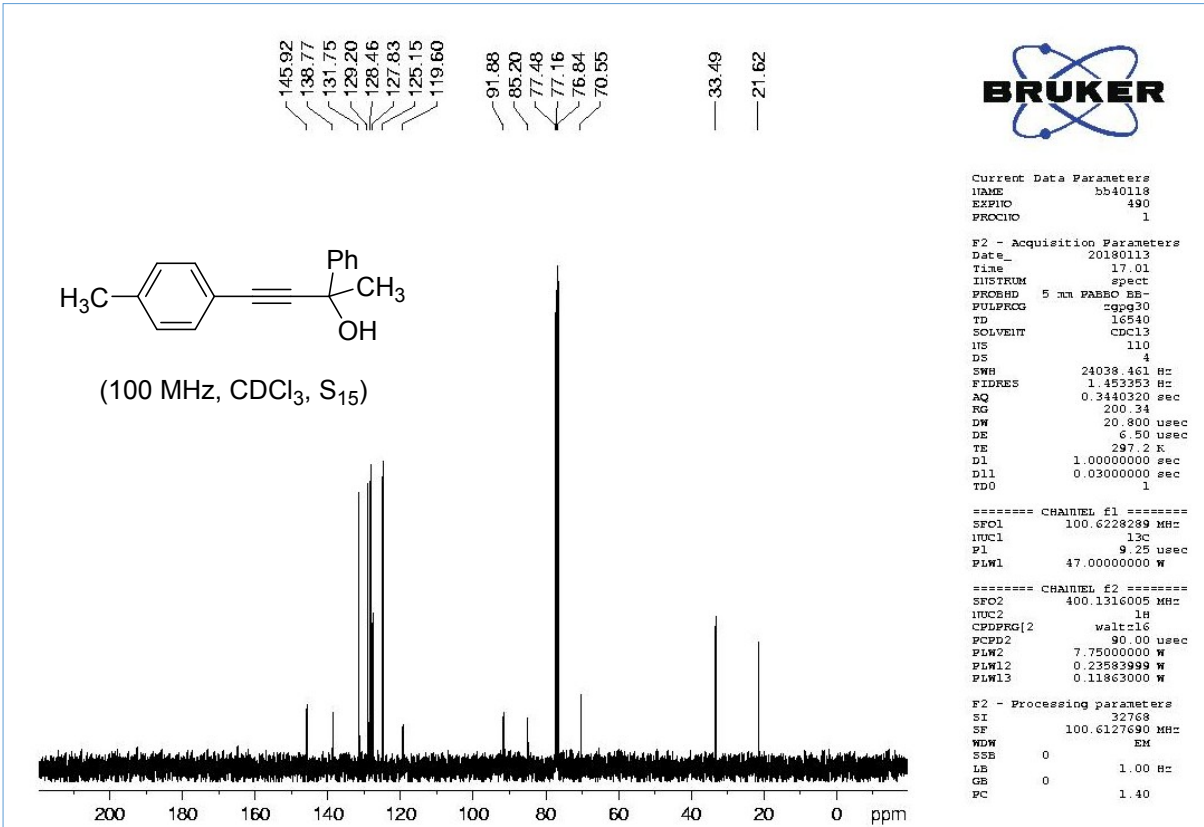

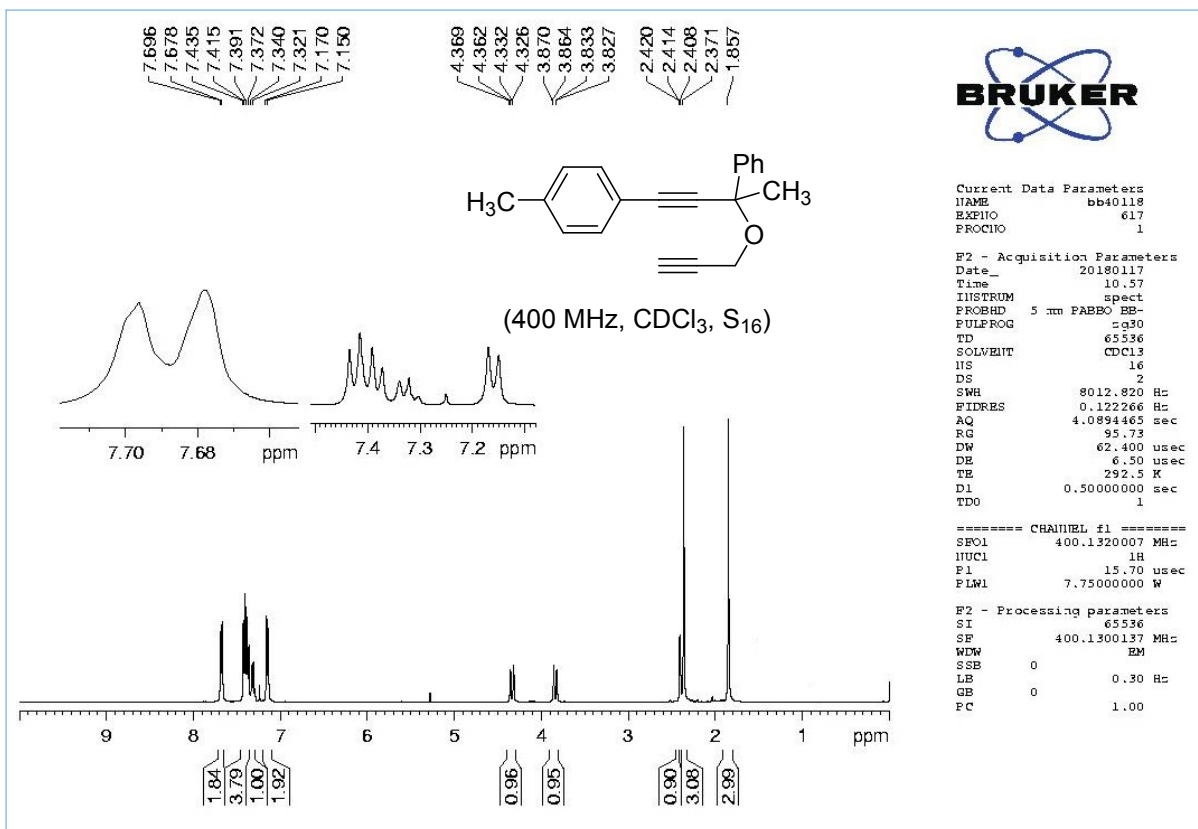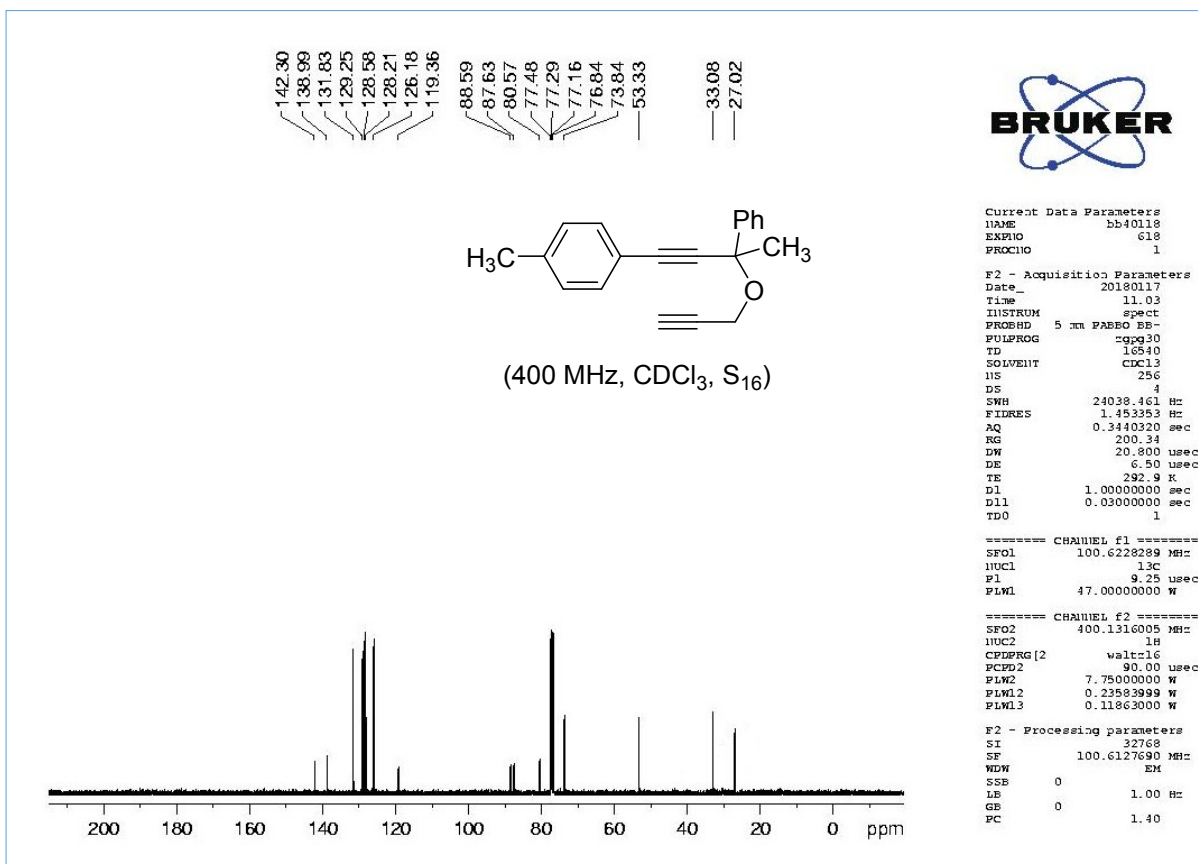

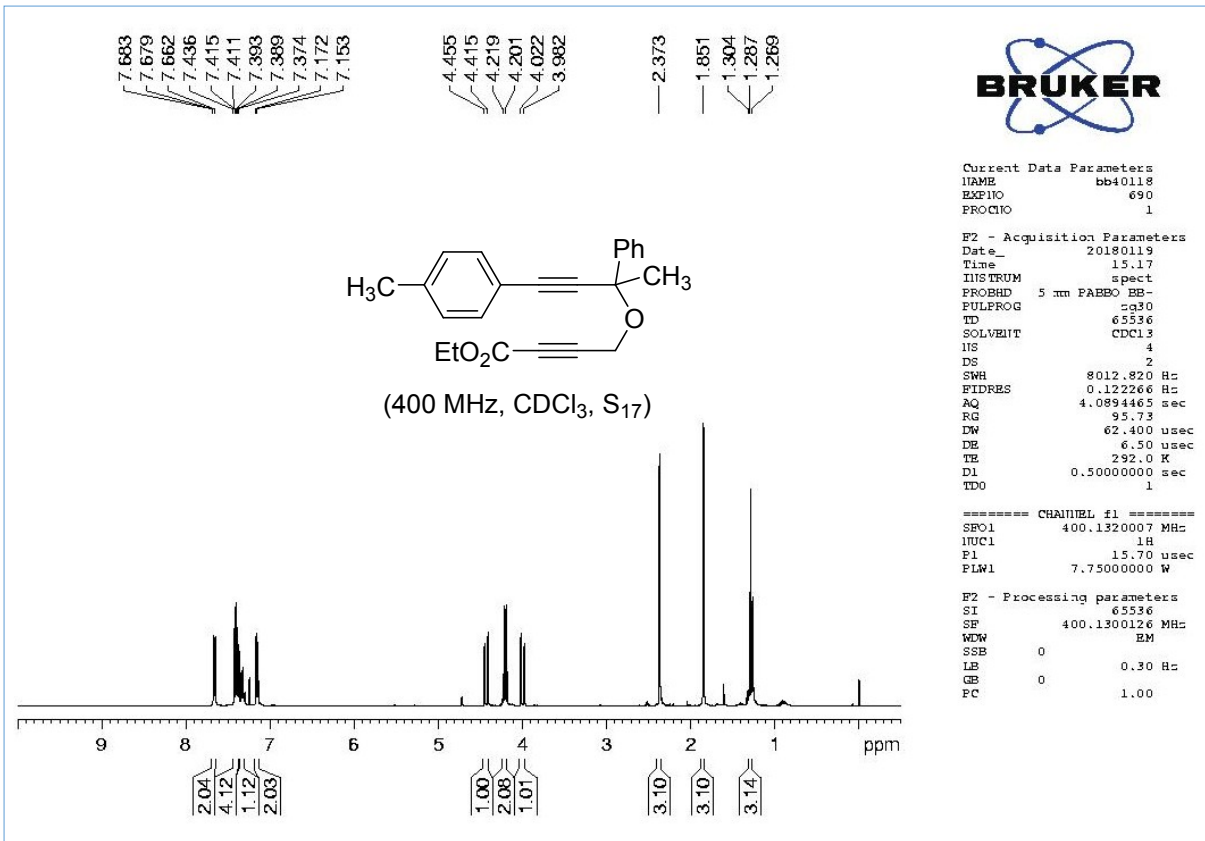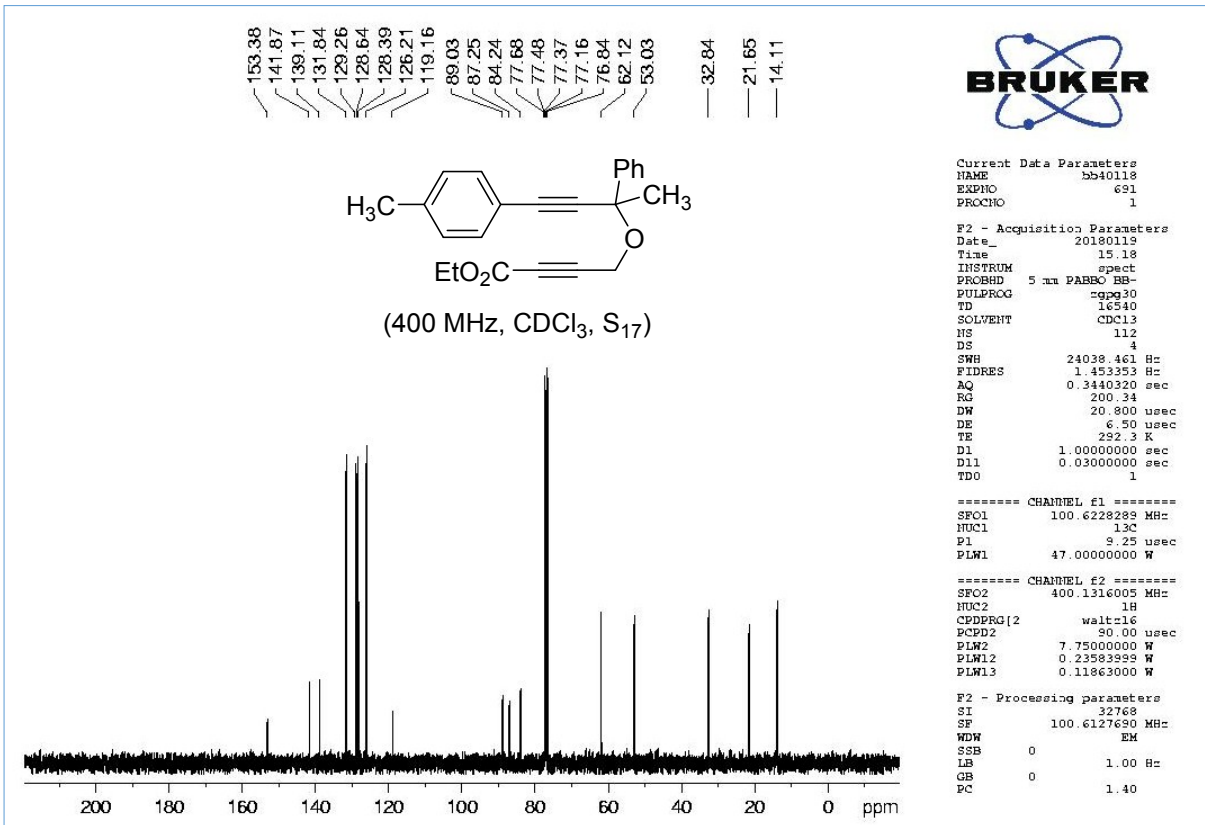

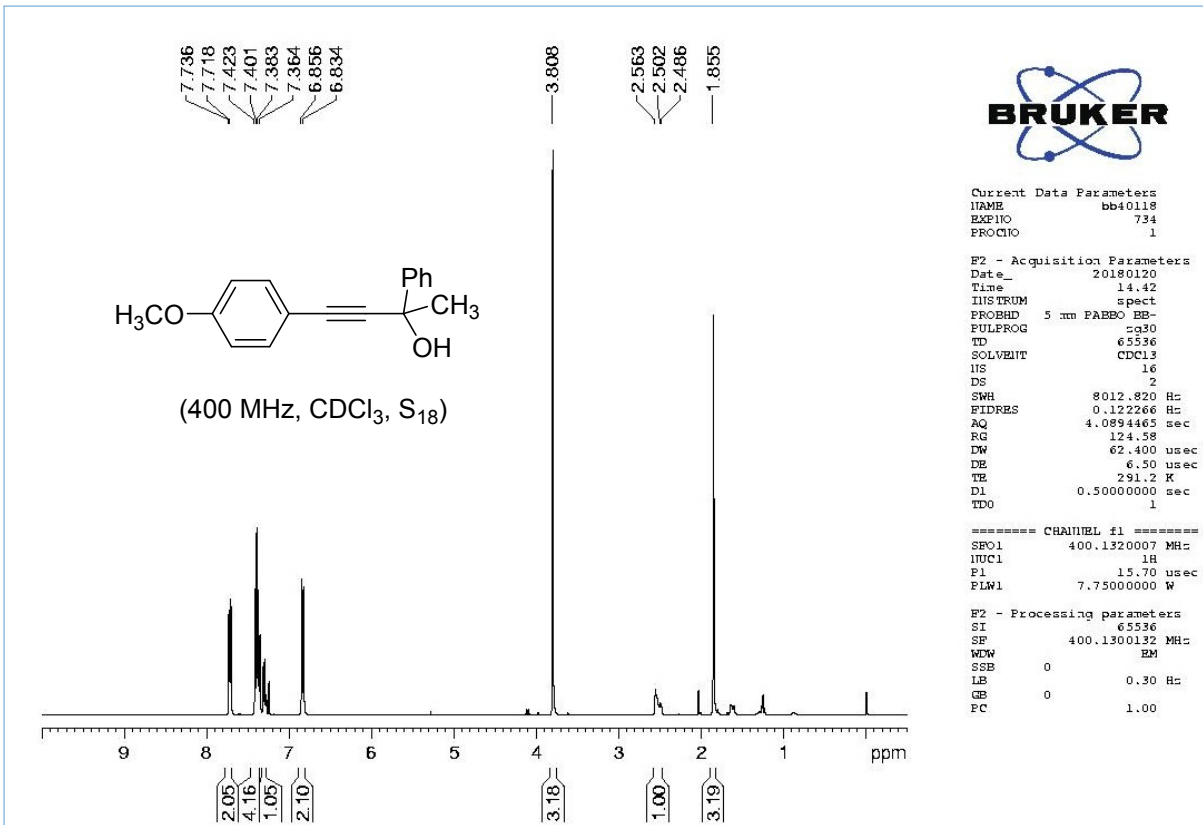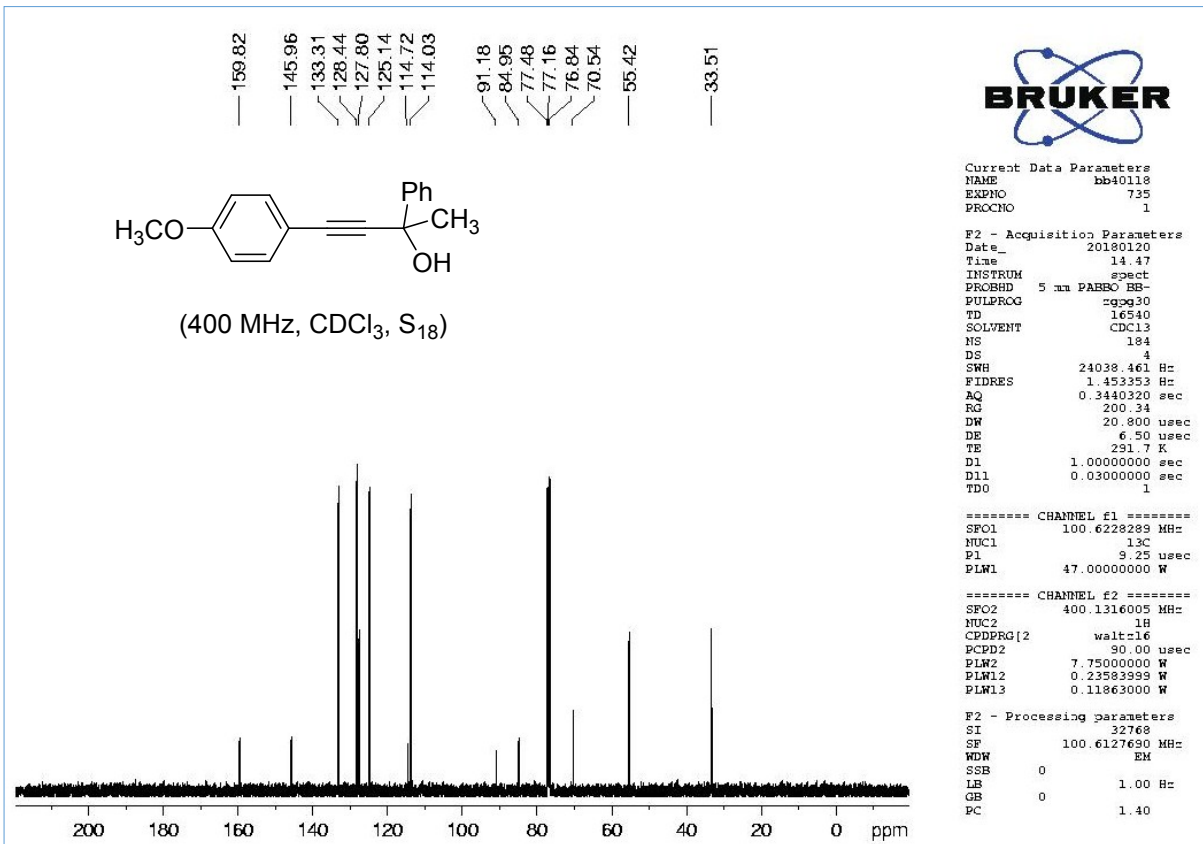

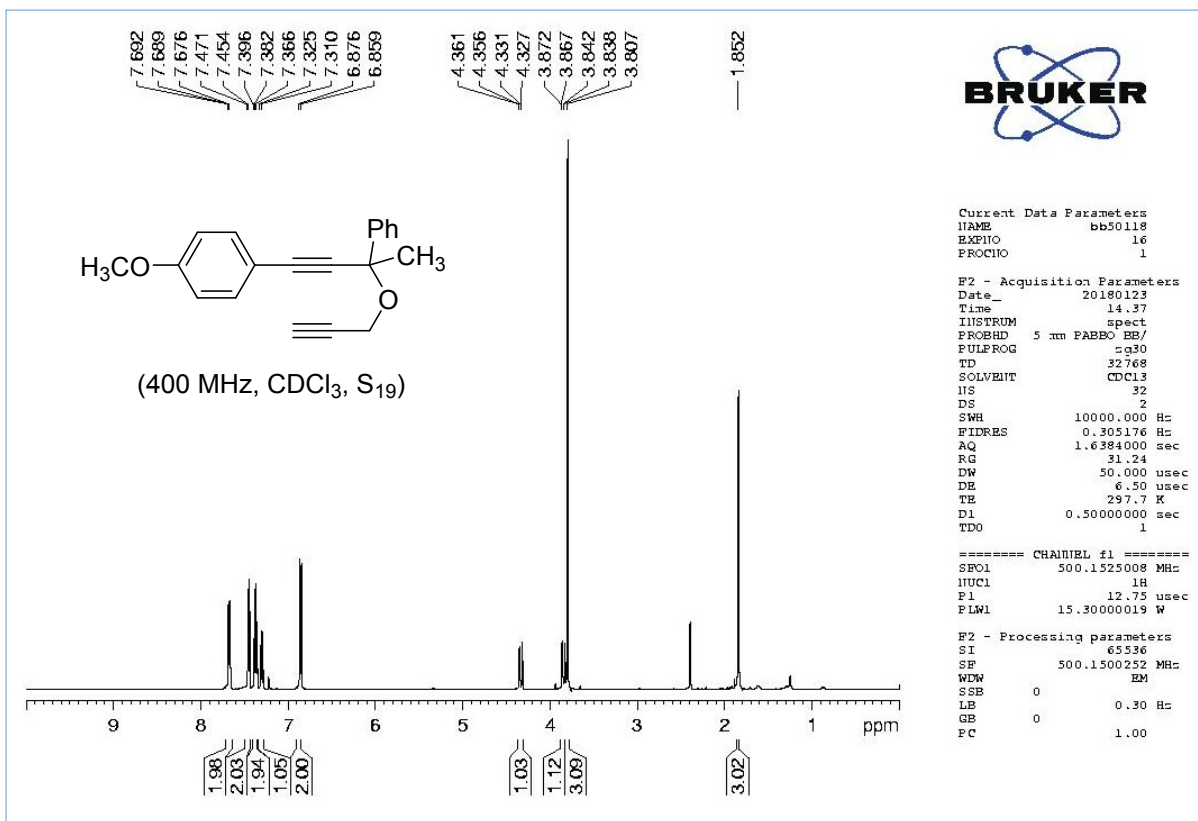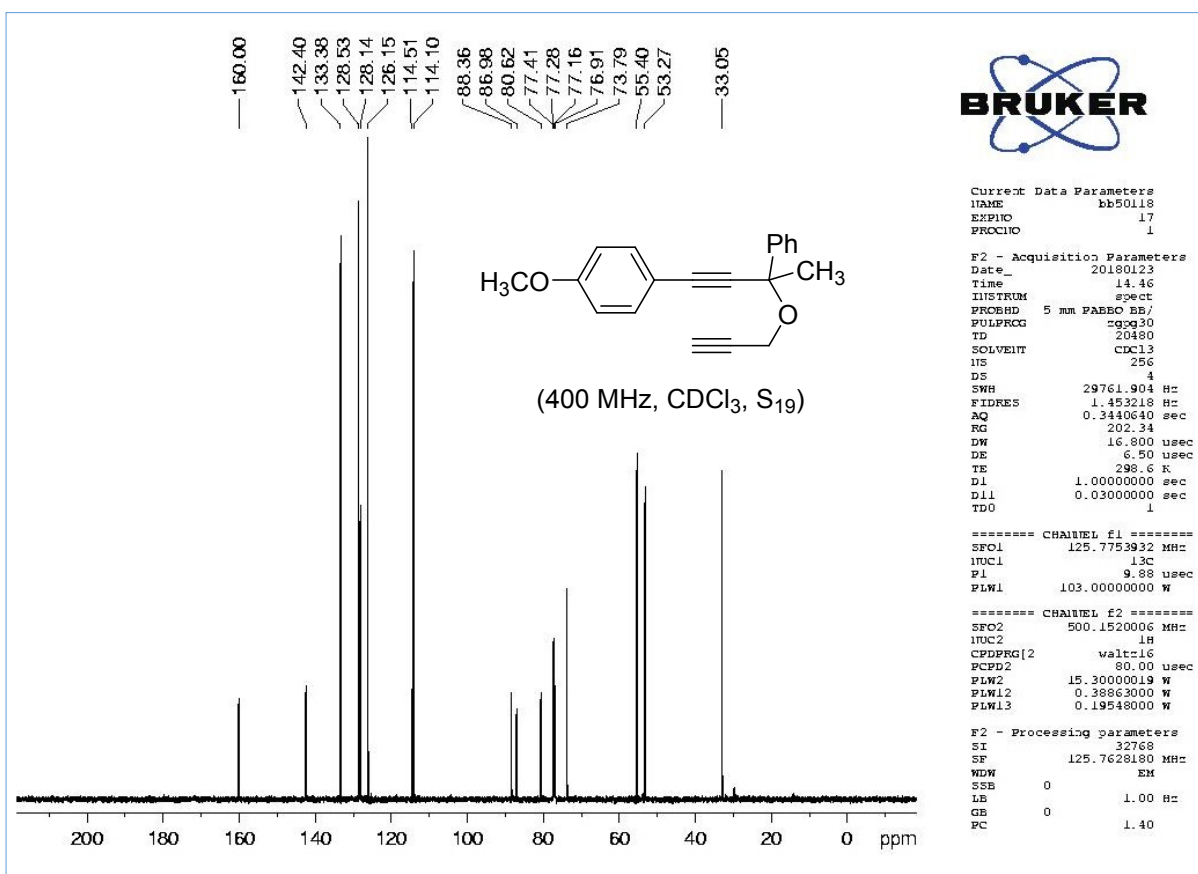



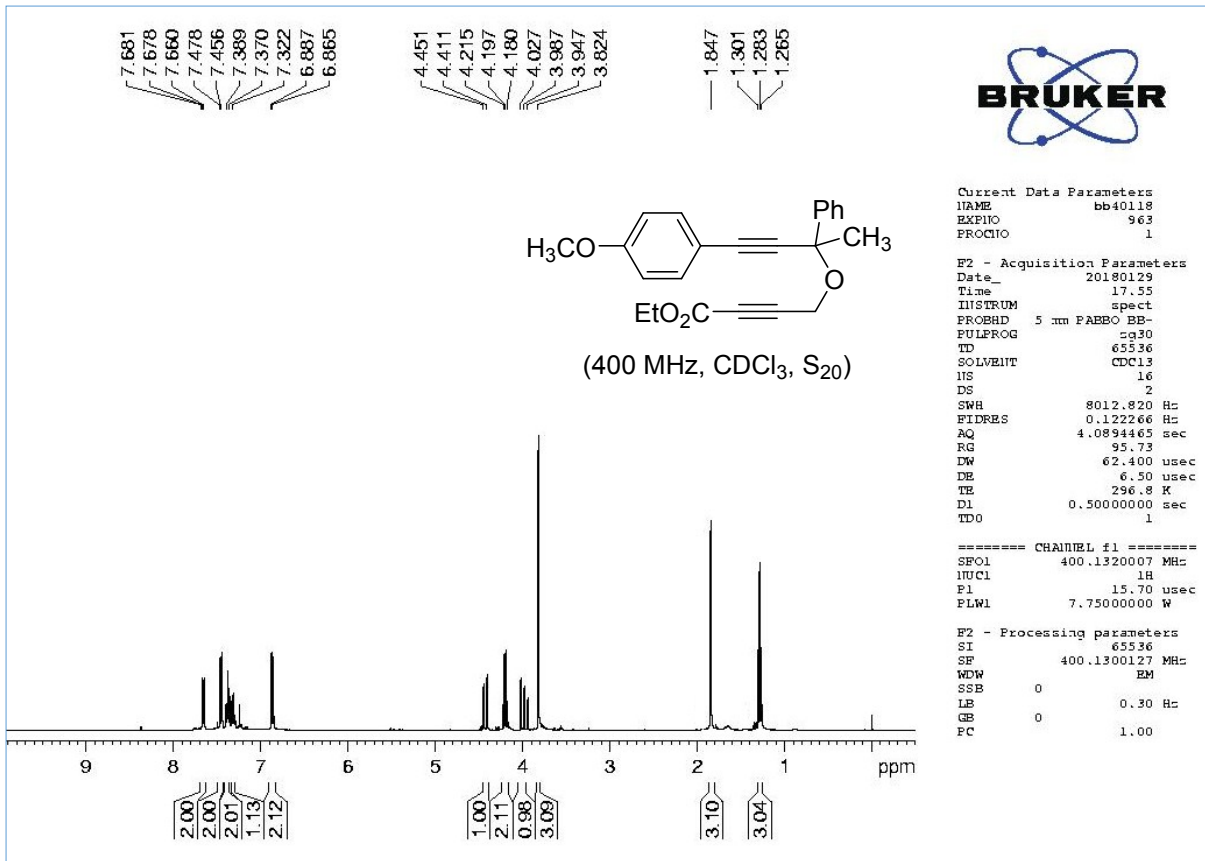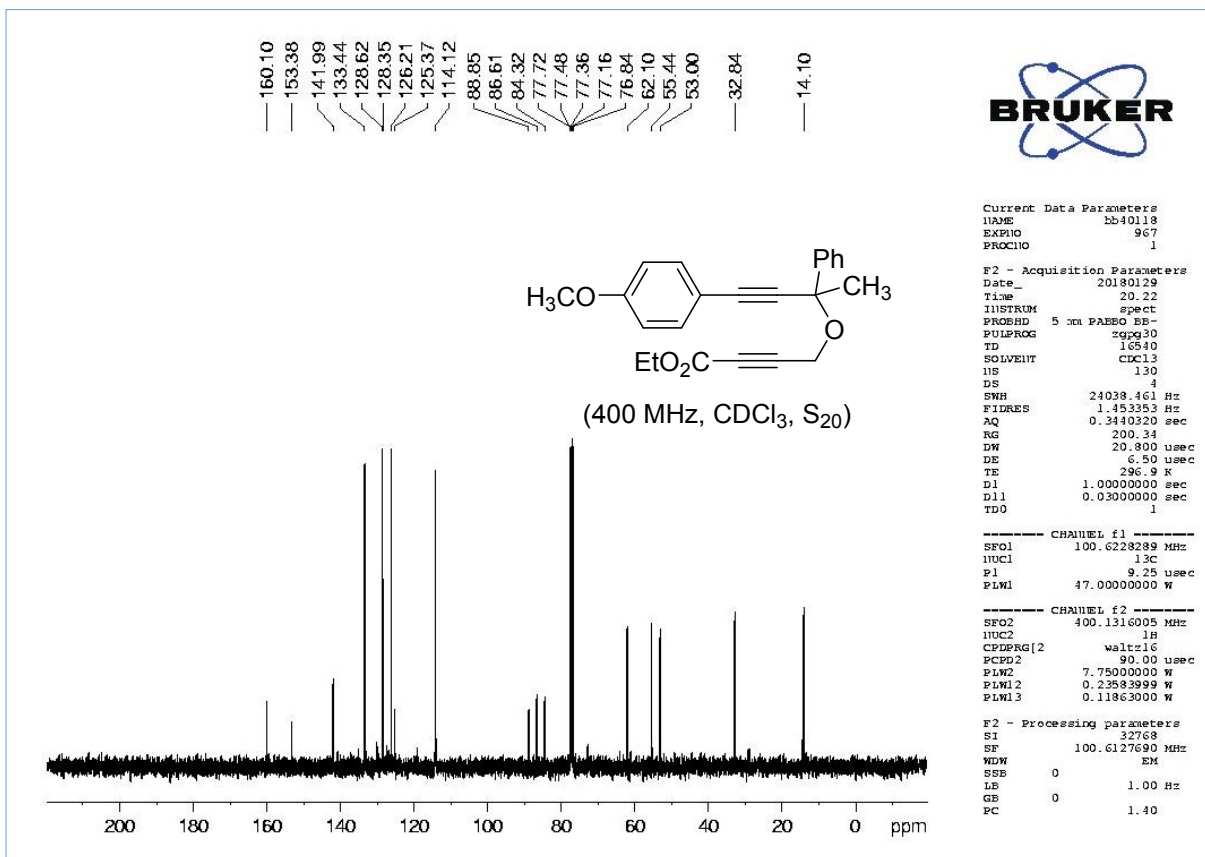

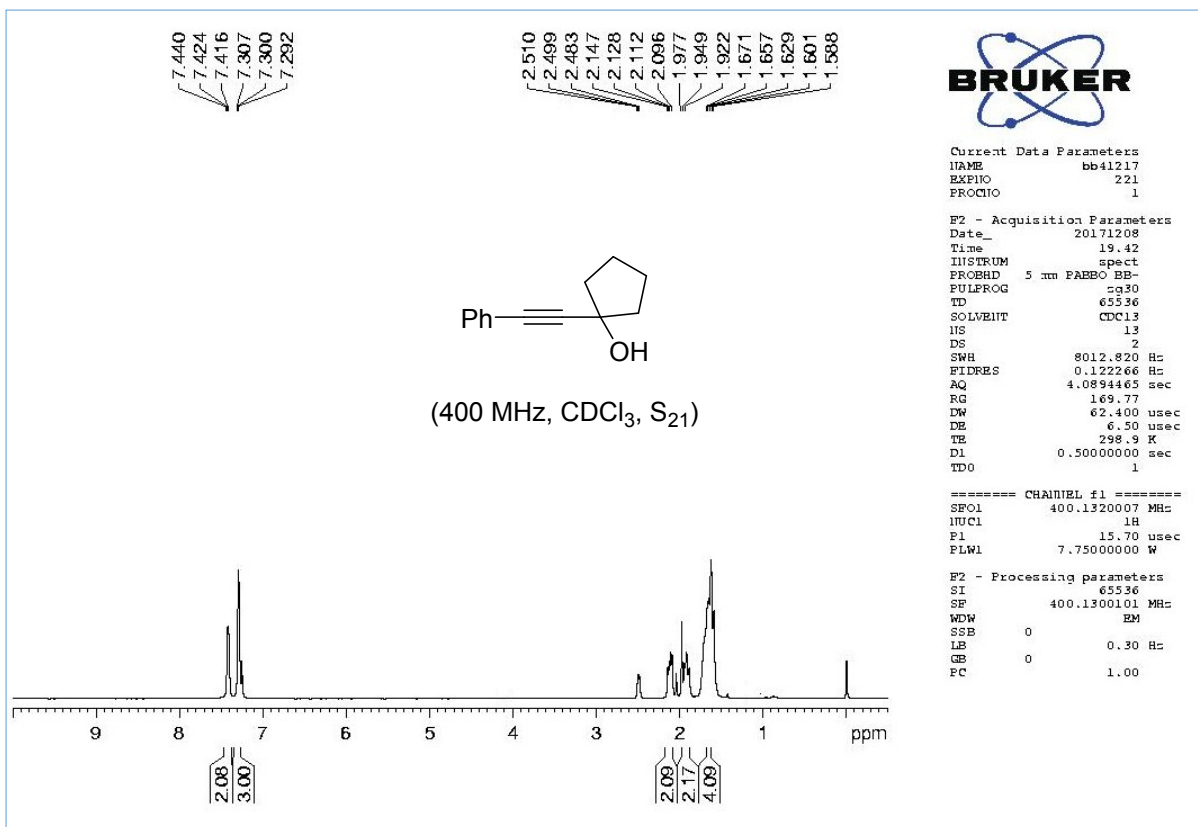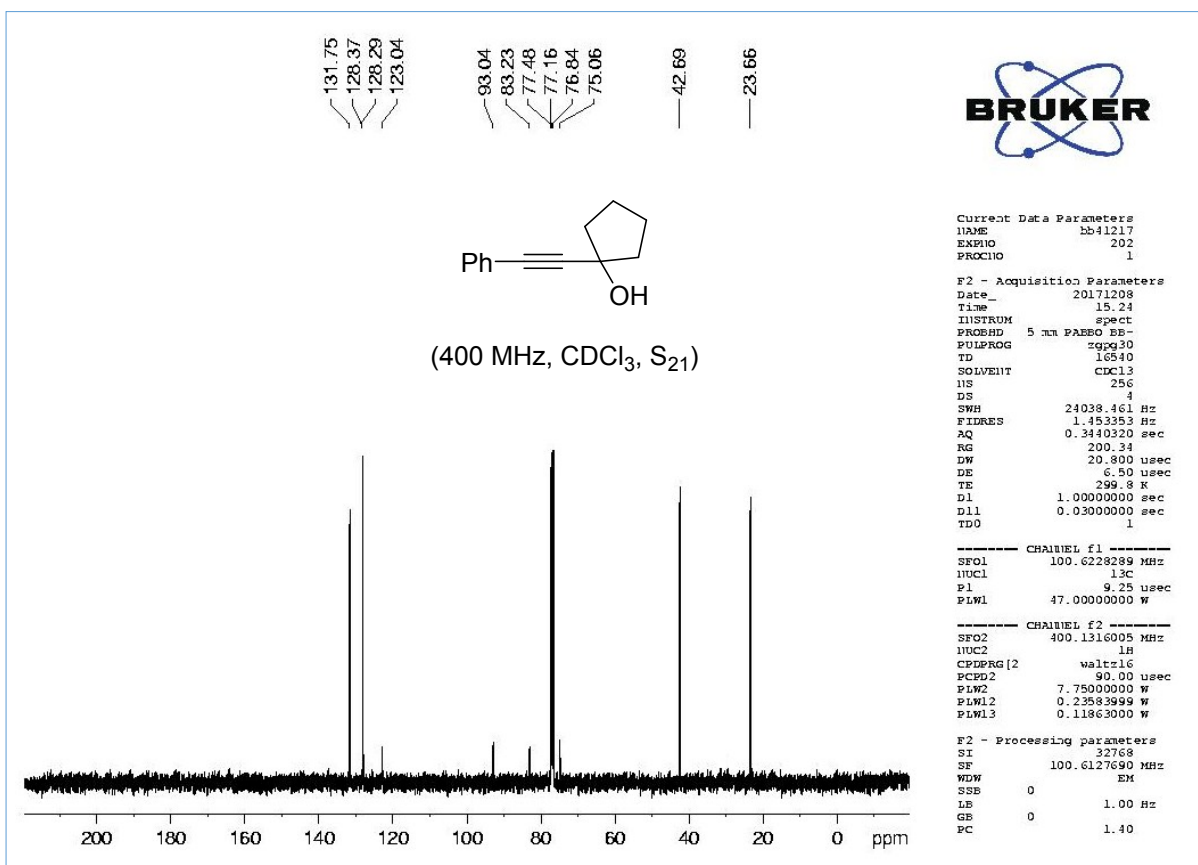

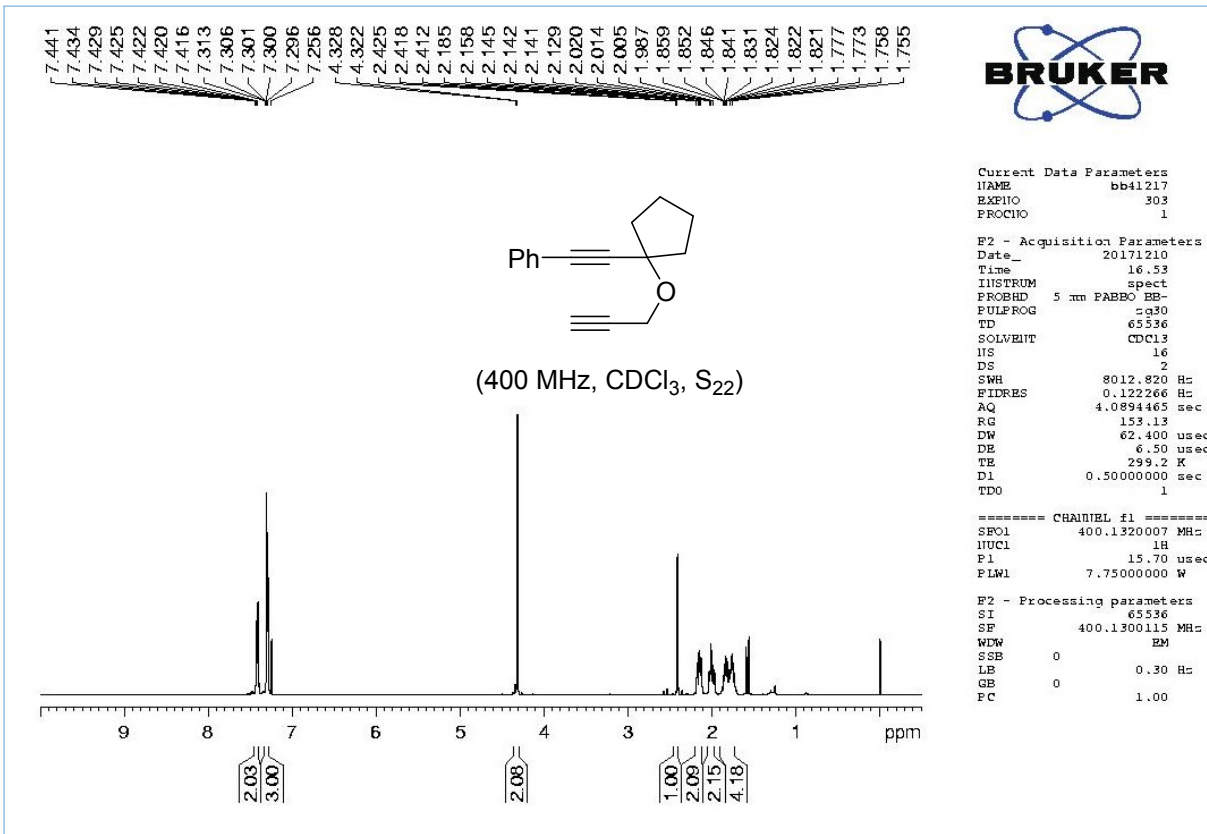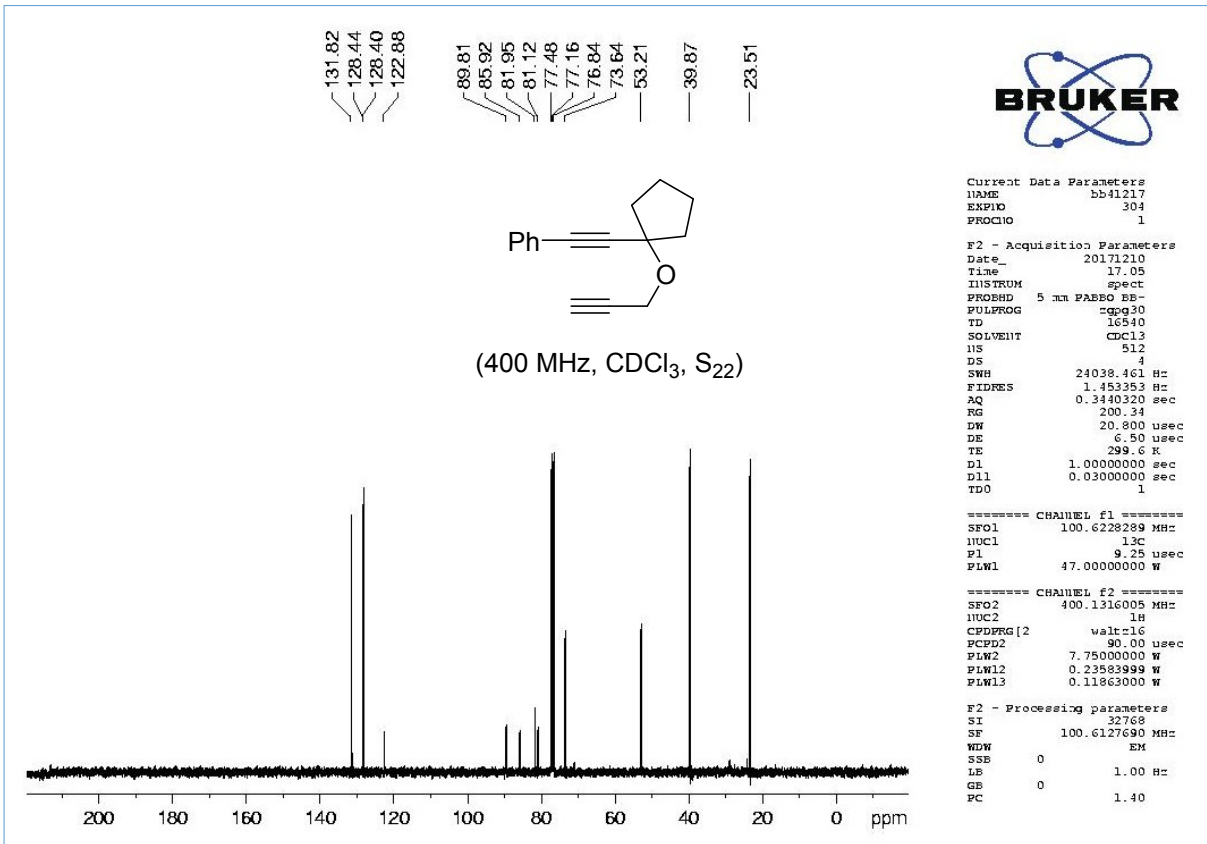

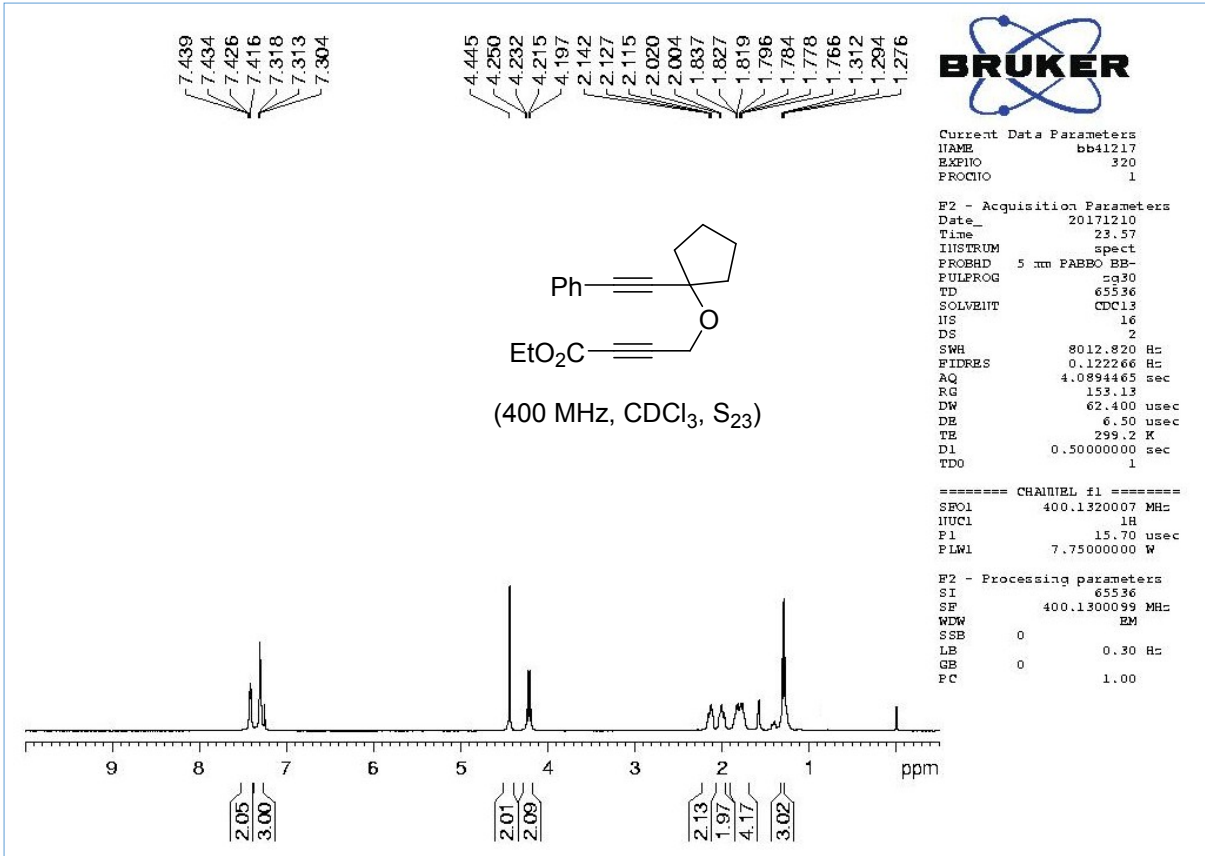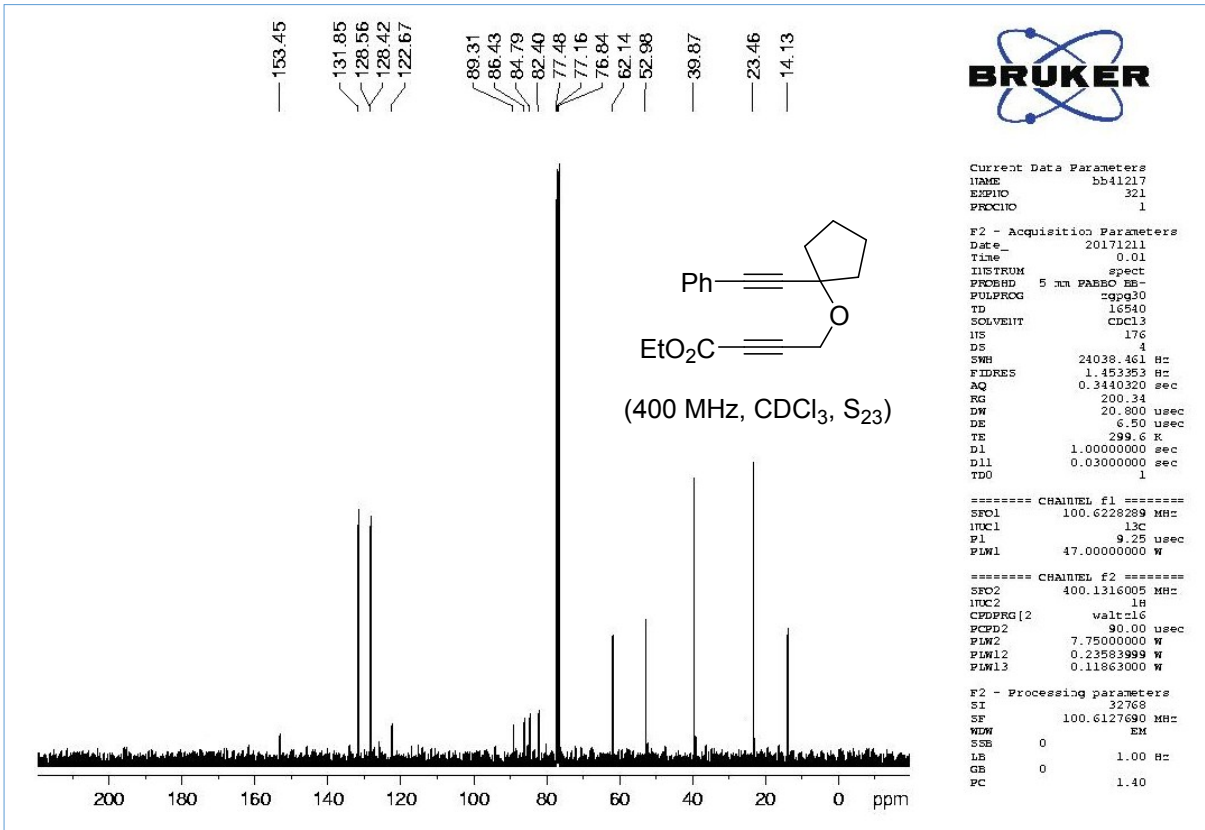

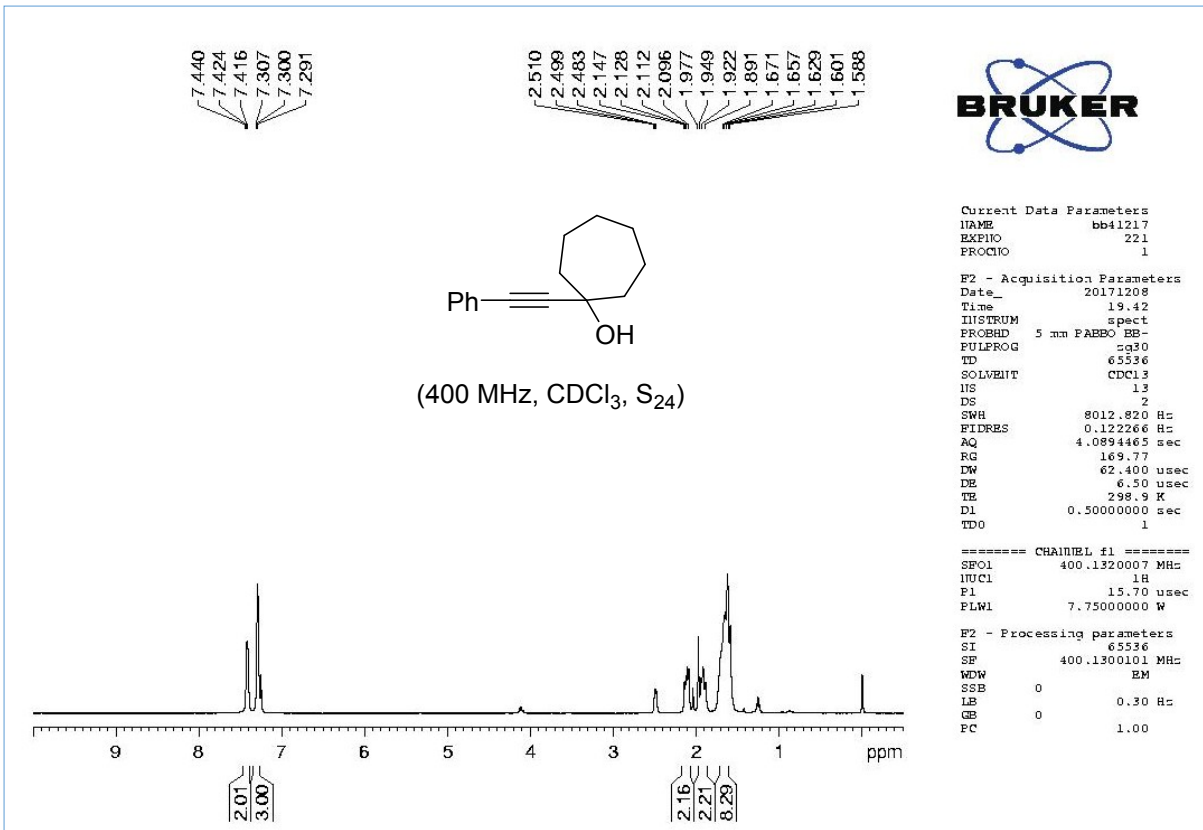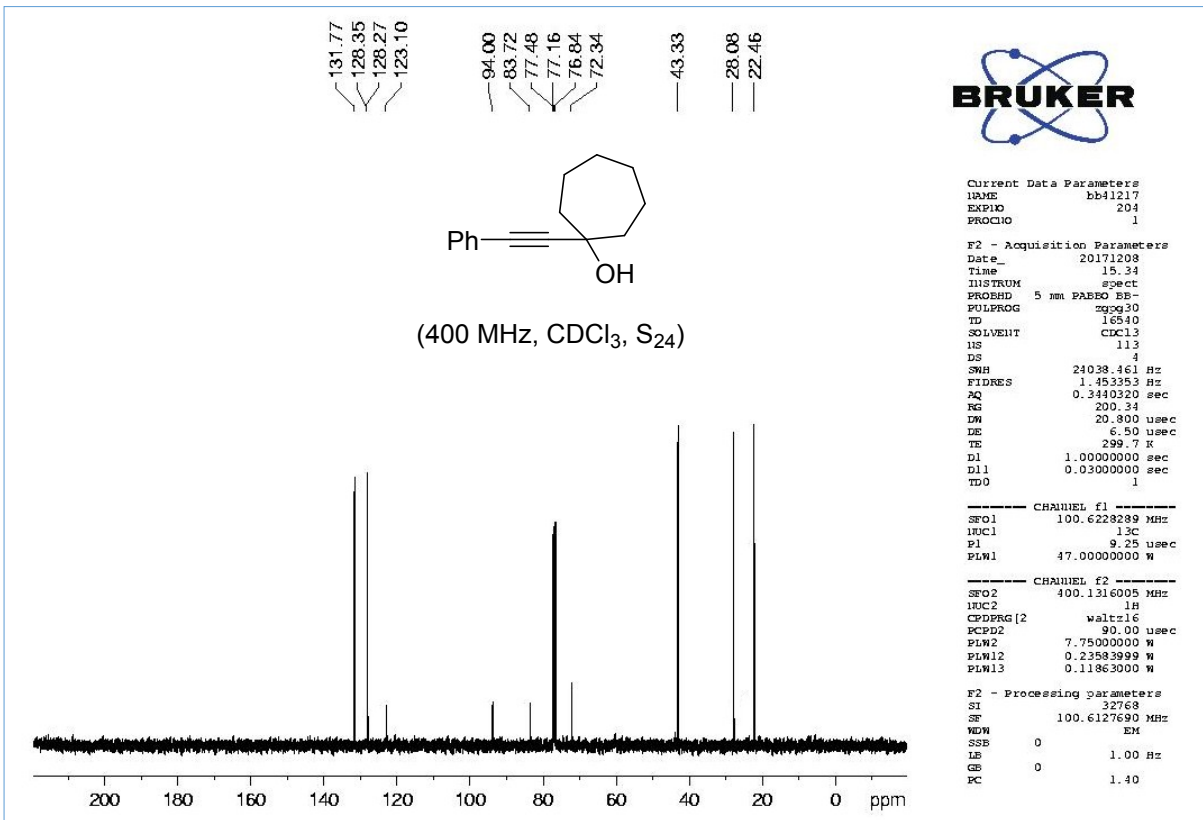

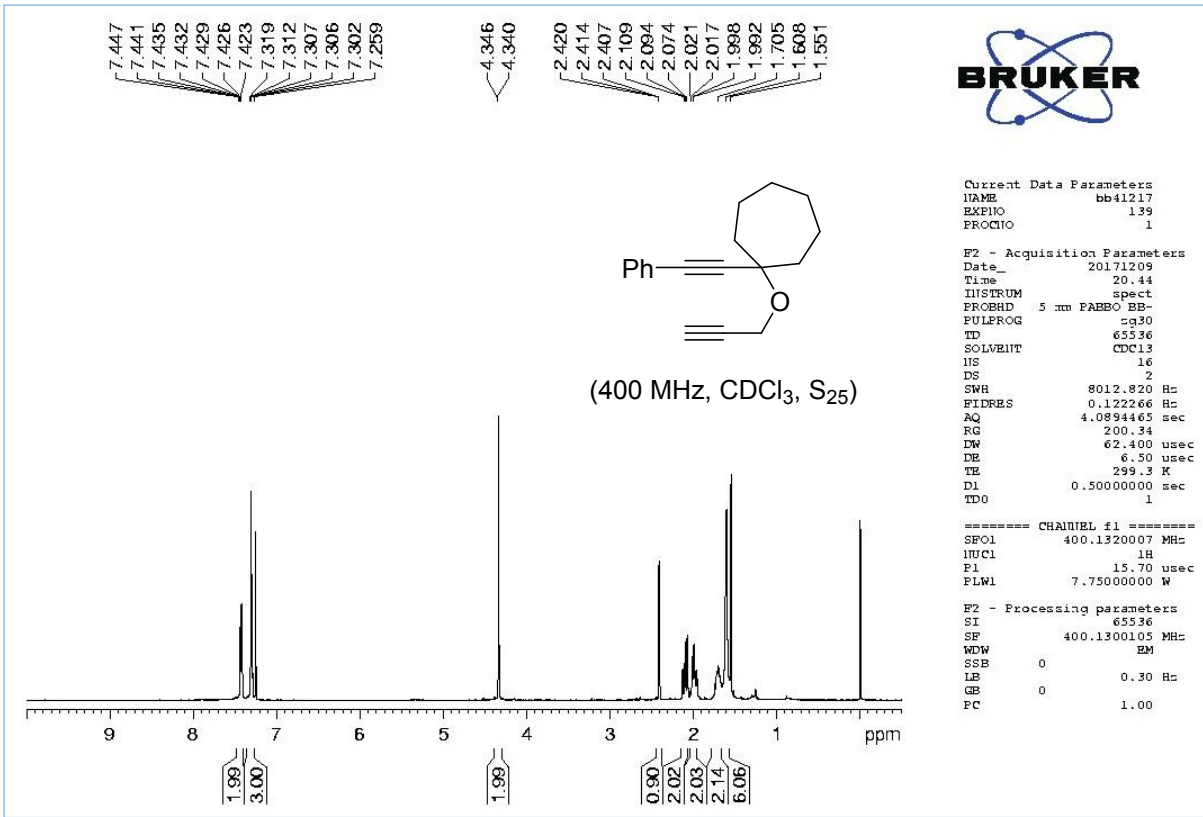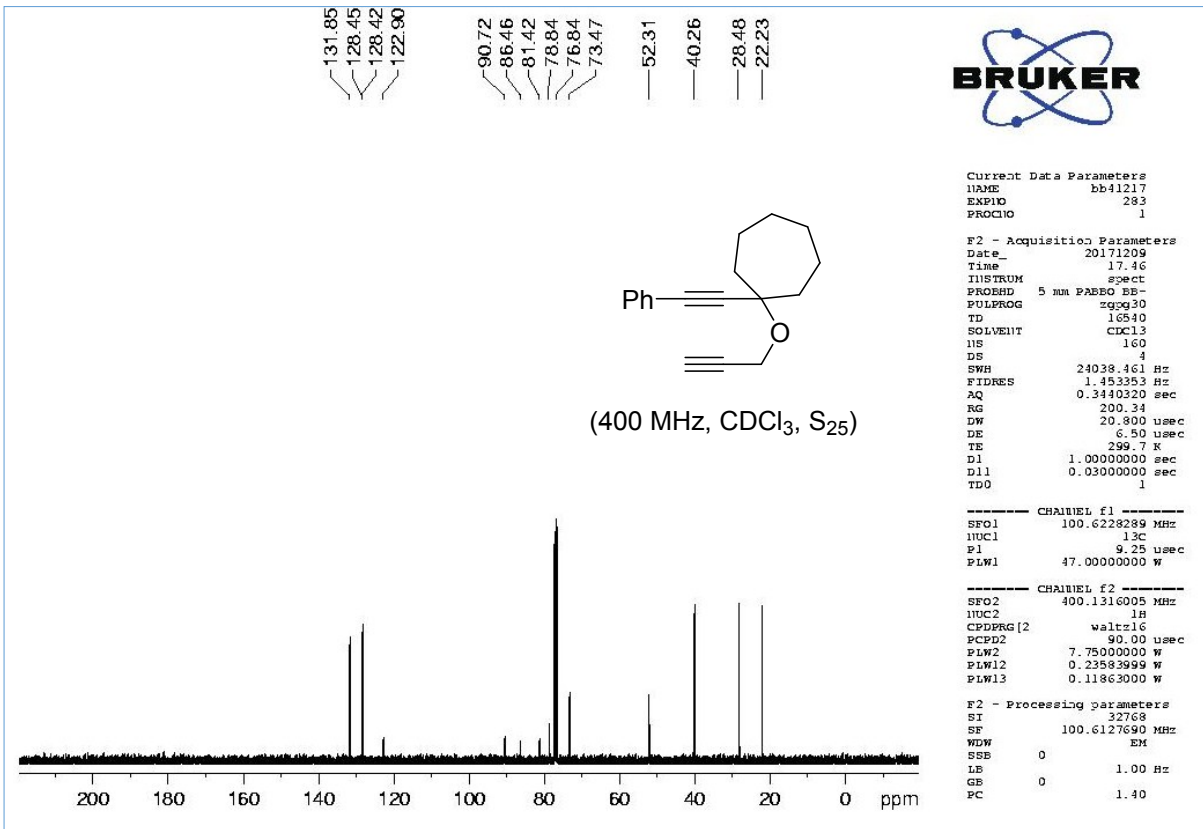



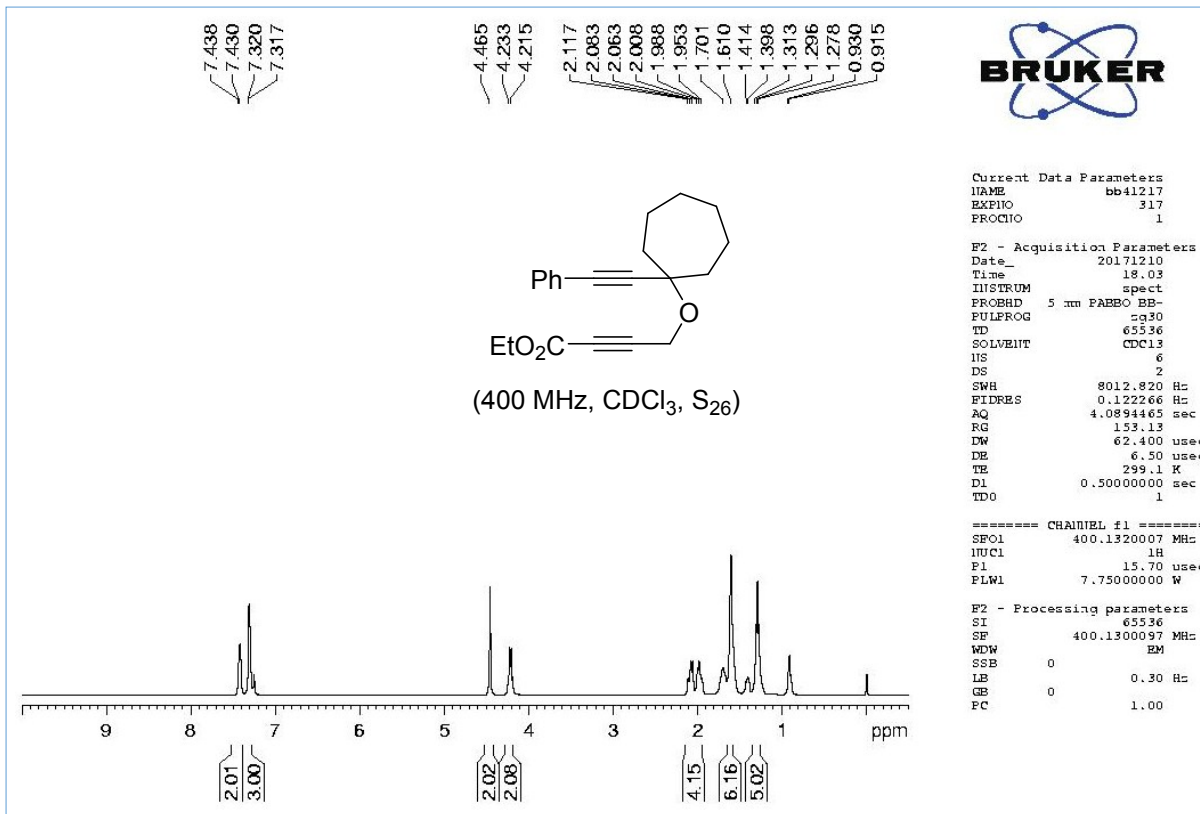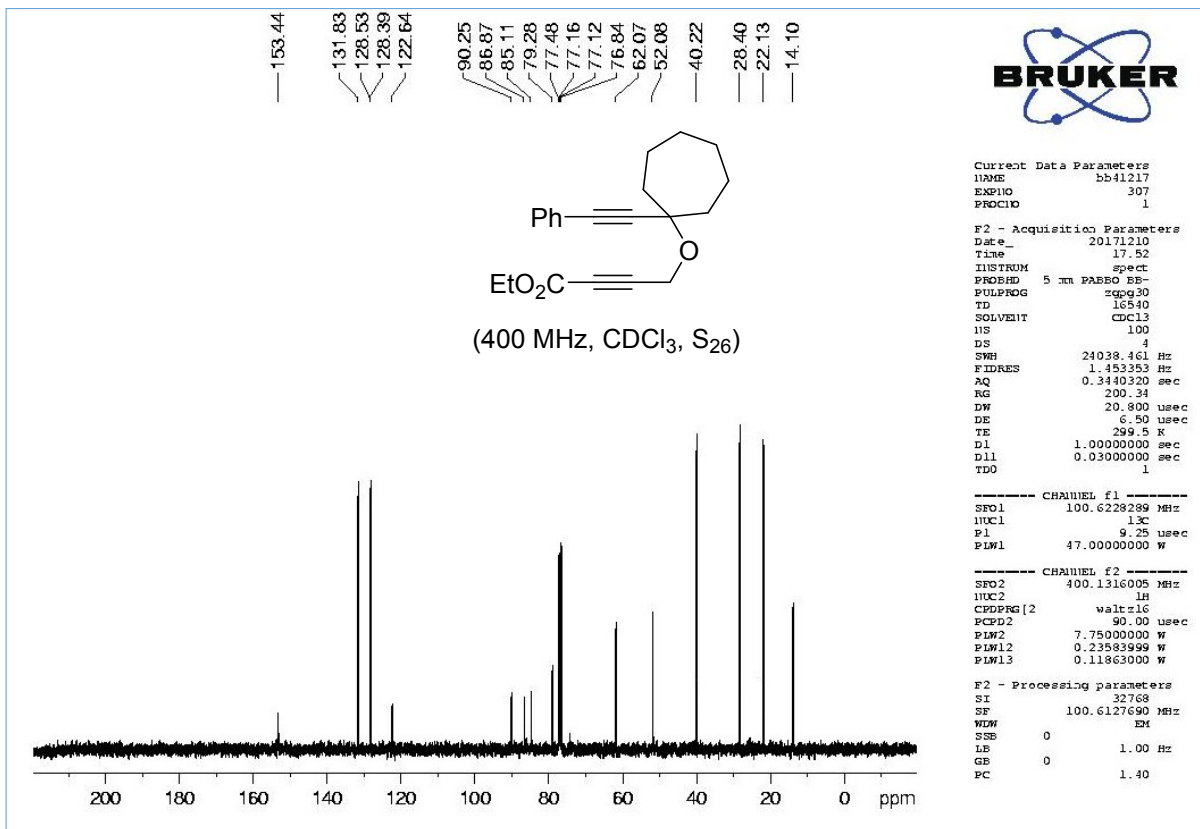

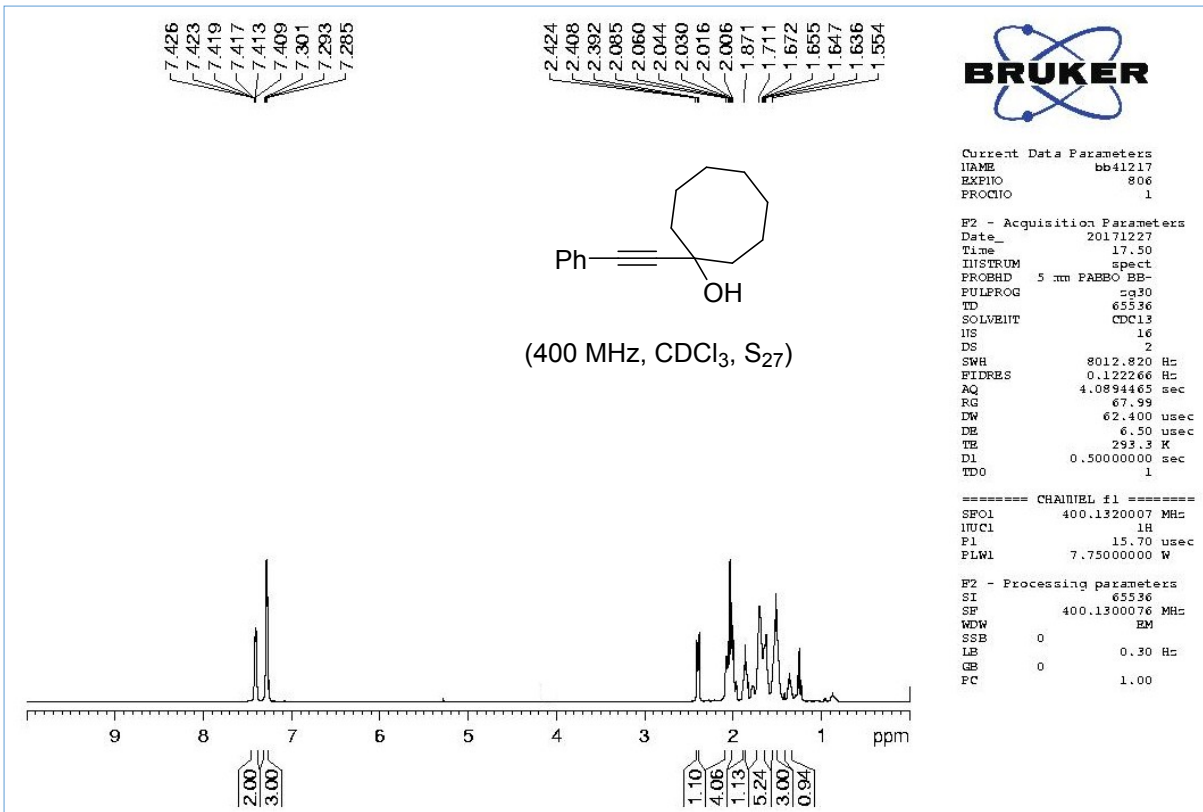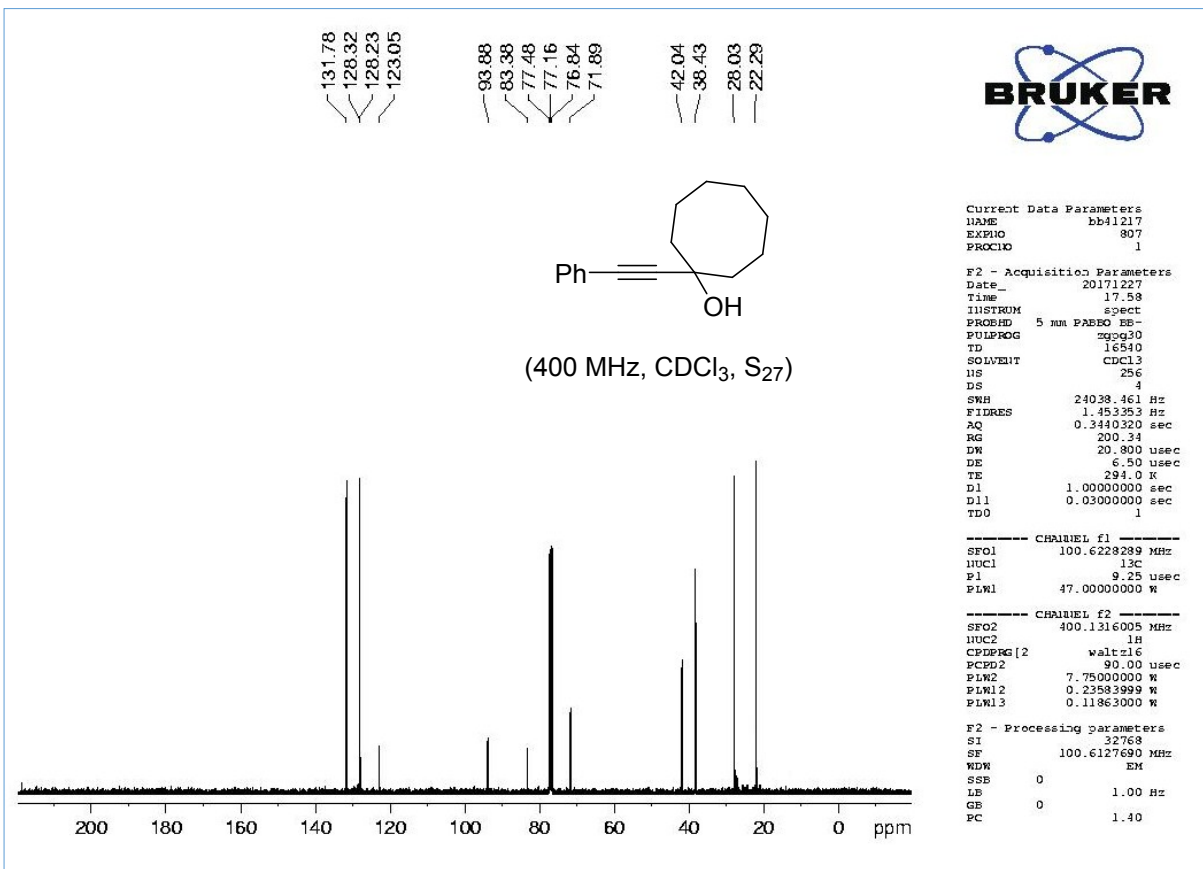

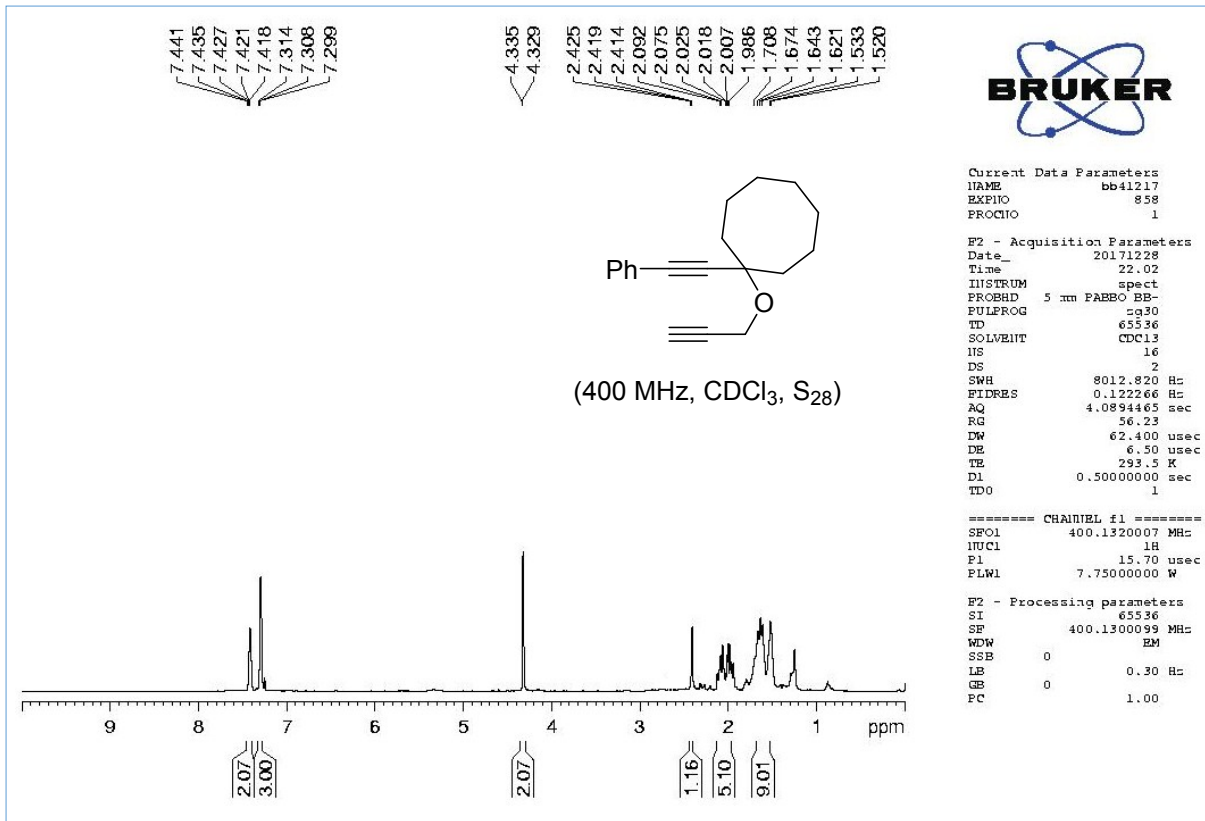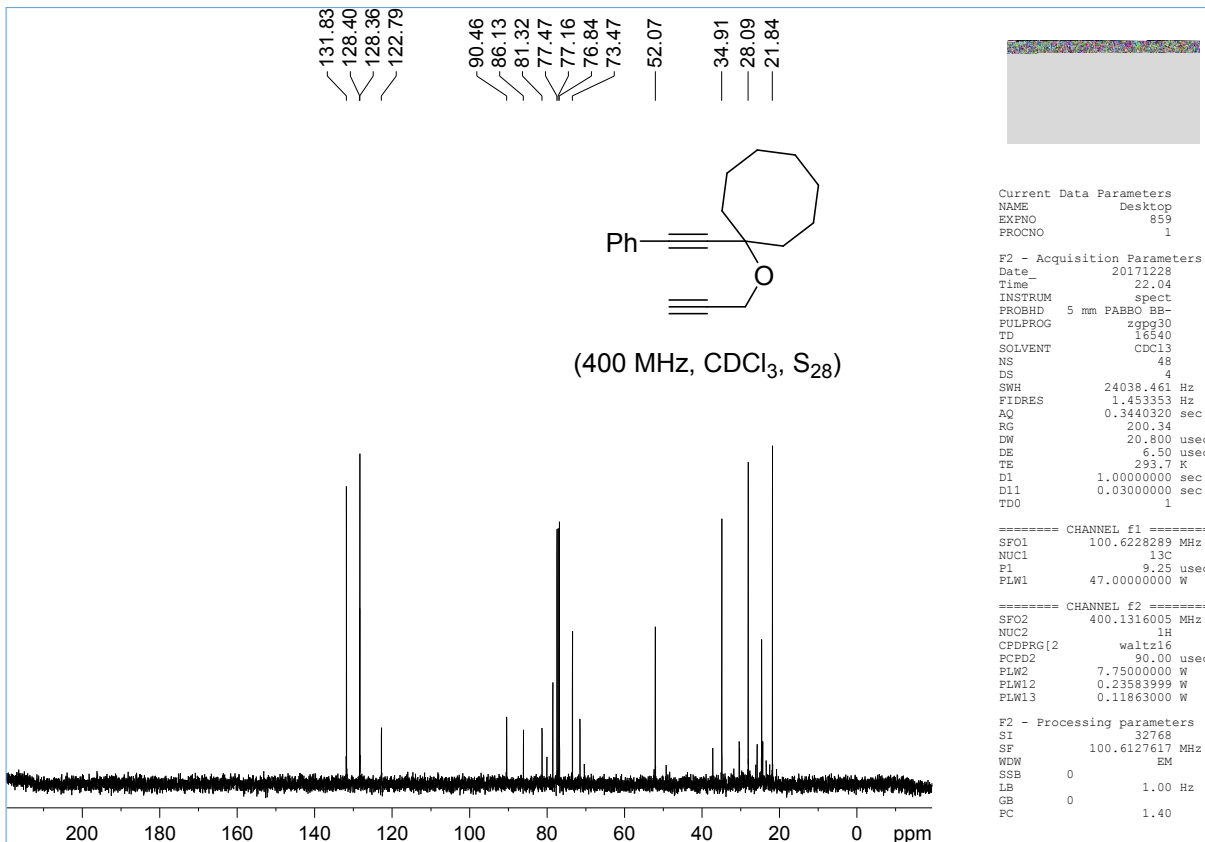

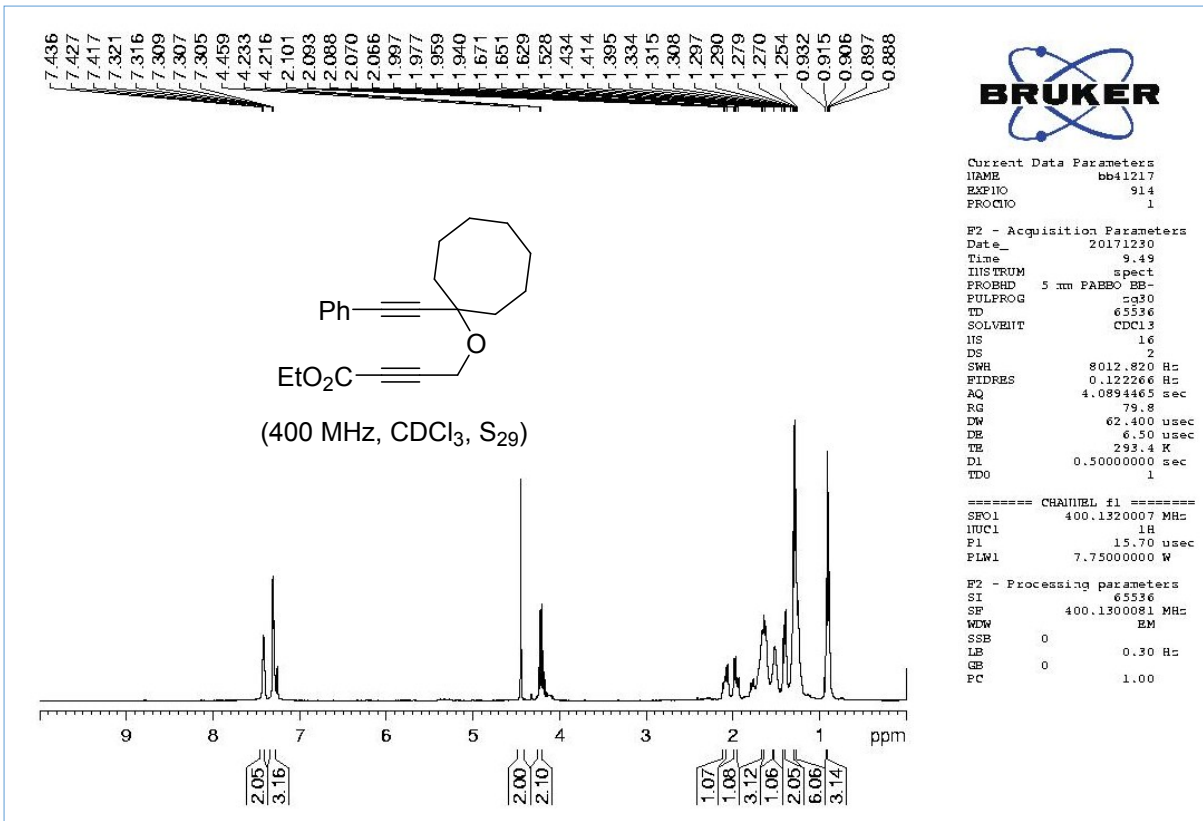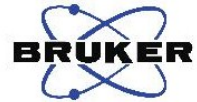

Current Data Parameters  
NAME bb41217  
EXPNO 914  
PROCNO 1

F2 - Acquisition Parameters  
Date\_ 20171230  
Time 9.49  
INSTRUM spect  
PROBHD 5 mm PABBO BB-  
PULPROG zg30  
TD 65536  
SOLVENT CDCl<sub>3</sub>  
NS 16  
DS 2  
SWH 8012.820 Hz  
FIDRES 0.122266 Hz  
AQ 4.0894465 sec  
RG 79.8  
DM 62.400 usec  
DE 6.50 usec  
TE 293.4 K  
D1 0.5000000 sec  
TD0 1

==== CHANNEL f1 =====  
SFO1 400.1320007 MHz  
NUC1 1H  
P1 15.70 usec  
PLW1 7.75000000 W

F2 - Processing parameters  
SI 65536  
SF 400.1300081 MHz  
WDW EM  
SSB 0  
LB 0.30 Hz  
GB 0  
PC 1.00

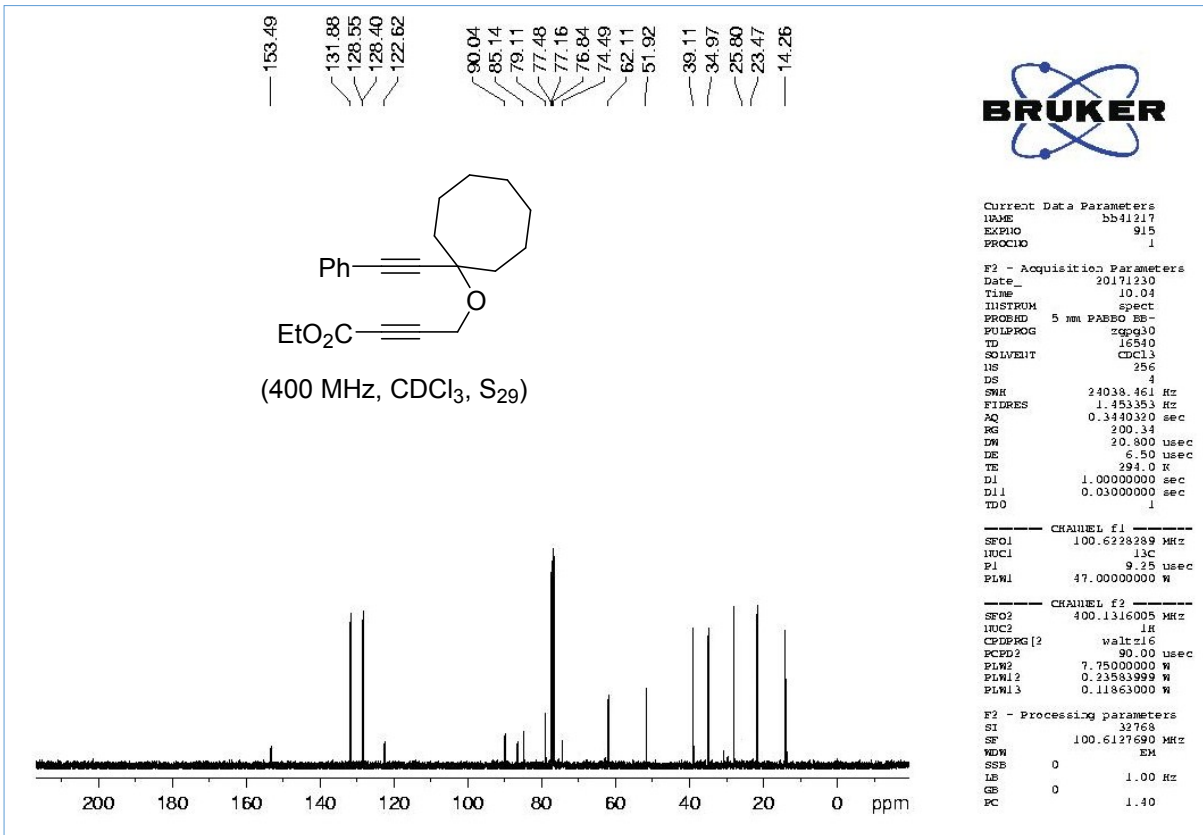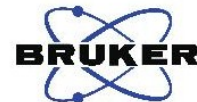

Current Data Parameters  
NAME bb41217  
EXPNO 915  
PROCNO 1

F2 - Acquisition Parameters  
Date\_ 20171230  
Time 10.04  
INSTRUM spect  
PROBHD 5 mm PABBO BB-  
PULPROG zgpg30  
TD 16540  
SOLVENT CDCl<sub>3</sub>  
NS 256  
DS 4  
SWH 24038.461 Hz  
FIDRES 1.453353 Hz  
AQ 0.3440320 sec  
RG 200.34  
DM 20.800 usec  
DE 6.50 usec  
TE 294.0 K  
D1 1.0000000 sec  
D11 0.0300000 sec  
TD0 1

==== CHANNEL f1 =====  
SFO1 100.6228289 MHz  
NUC1 13C  
P1 9.25 usec  
PLW1 47.0000000 W

==== CHANNEL f2 =====  
SFO2 400.1316005 MHz  
NUC2 1H  
CPDPRG2 waltz16  
PCPD2 90.00 usec  
PLW2 7.75000000 W  
PLW12 0.23583999 W  
PLW13 0.11863000 W

F2 - Processing parameters  
SI 32768  
SF 100.6127690 MHz  
WDW EM  
SSB 0  
LB 1.00 Hz  
GB 0  
PC 1.40

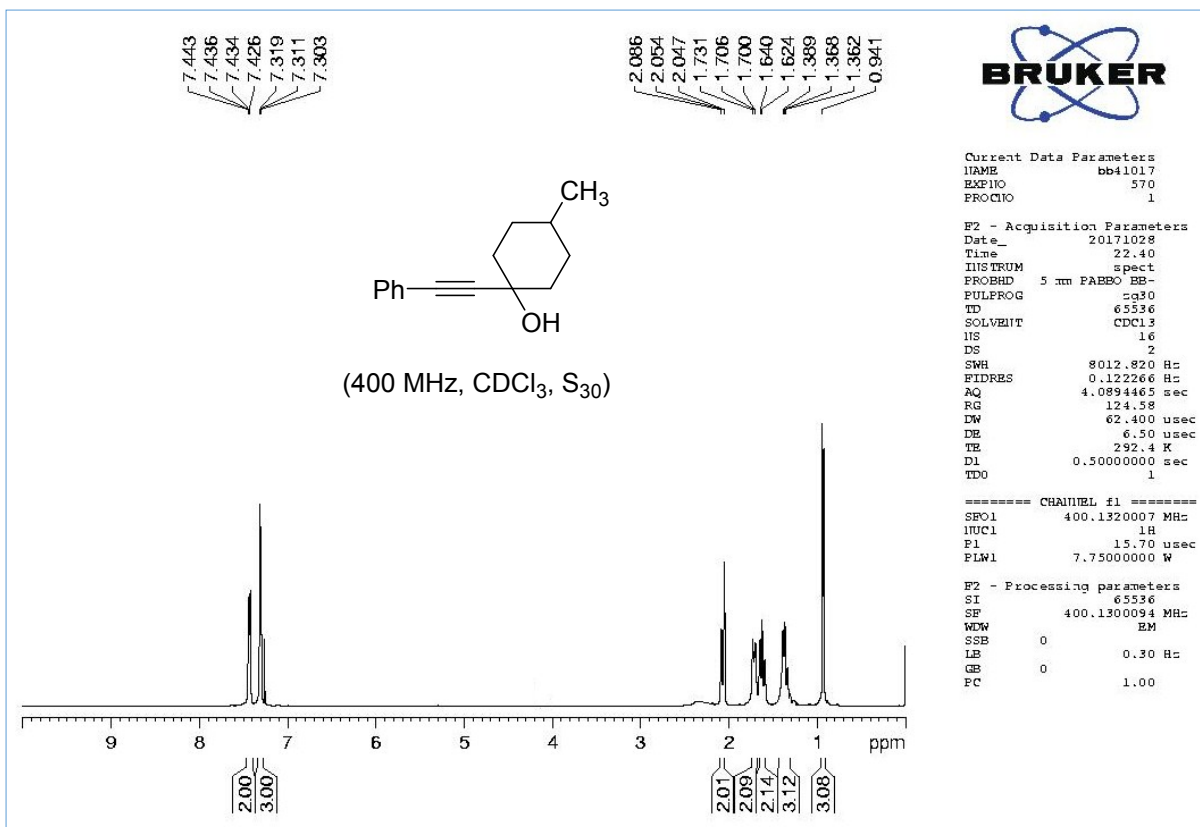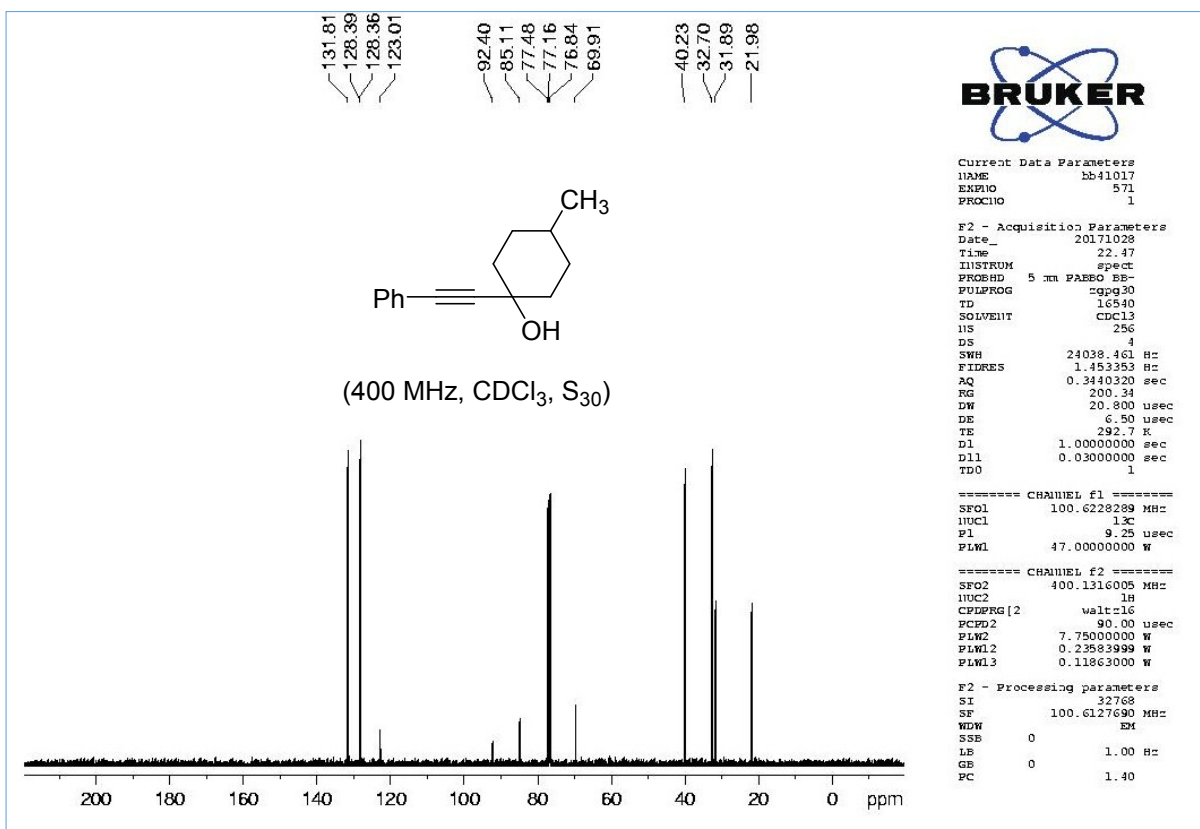

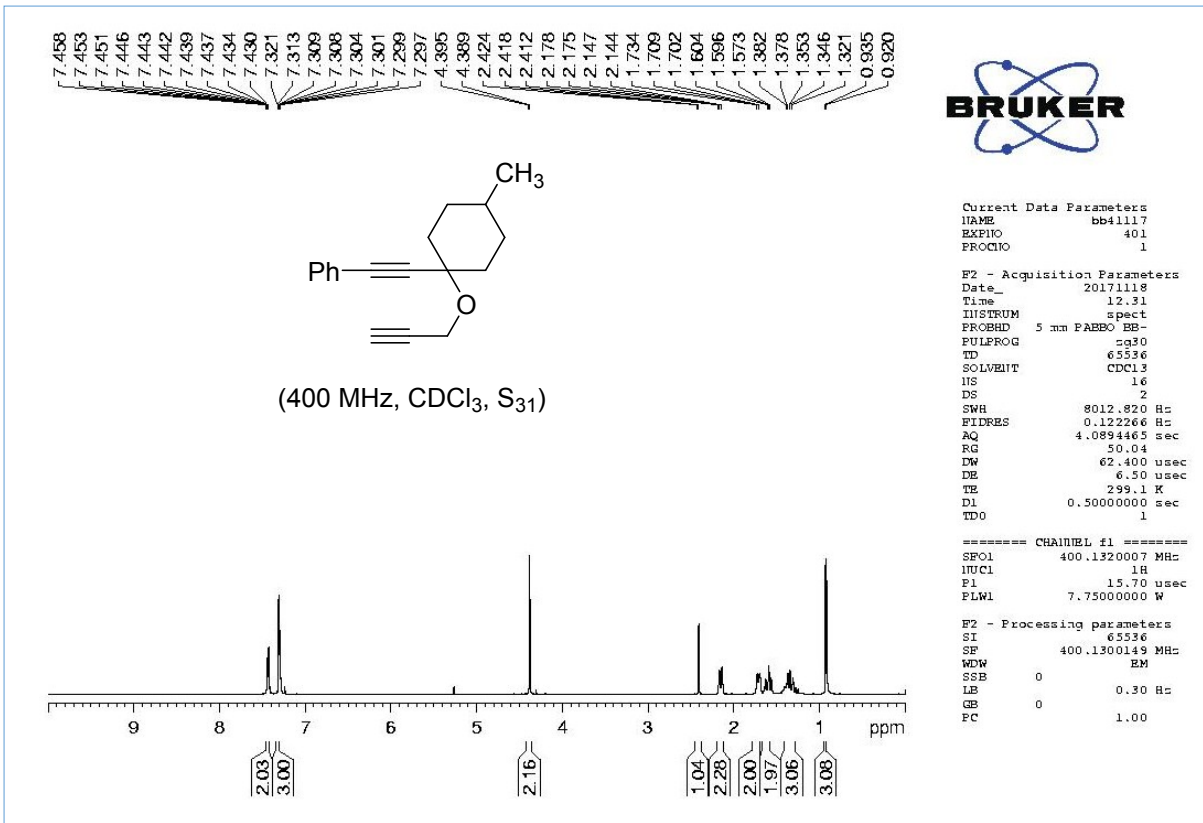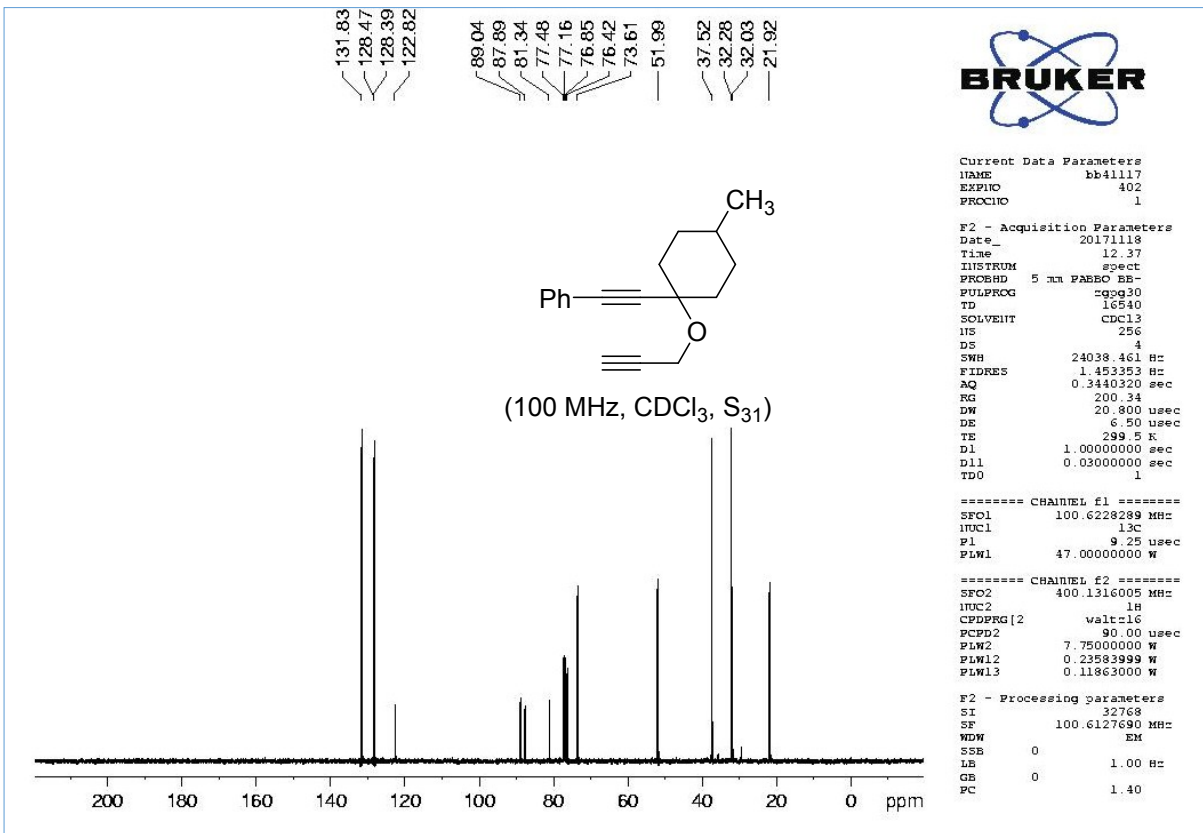



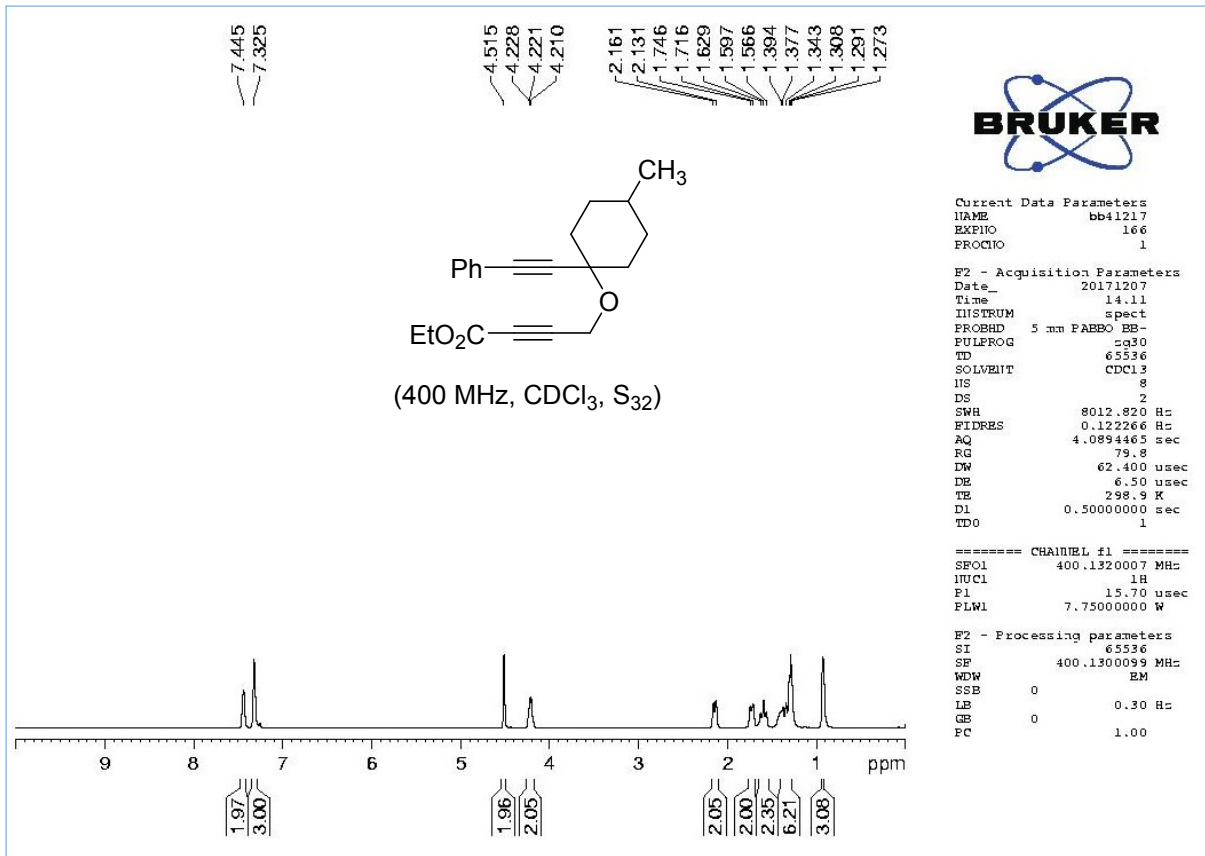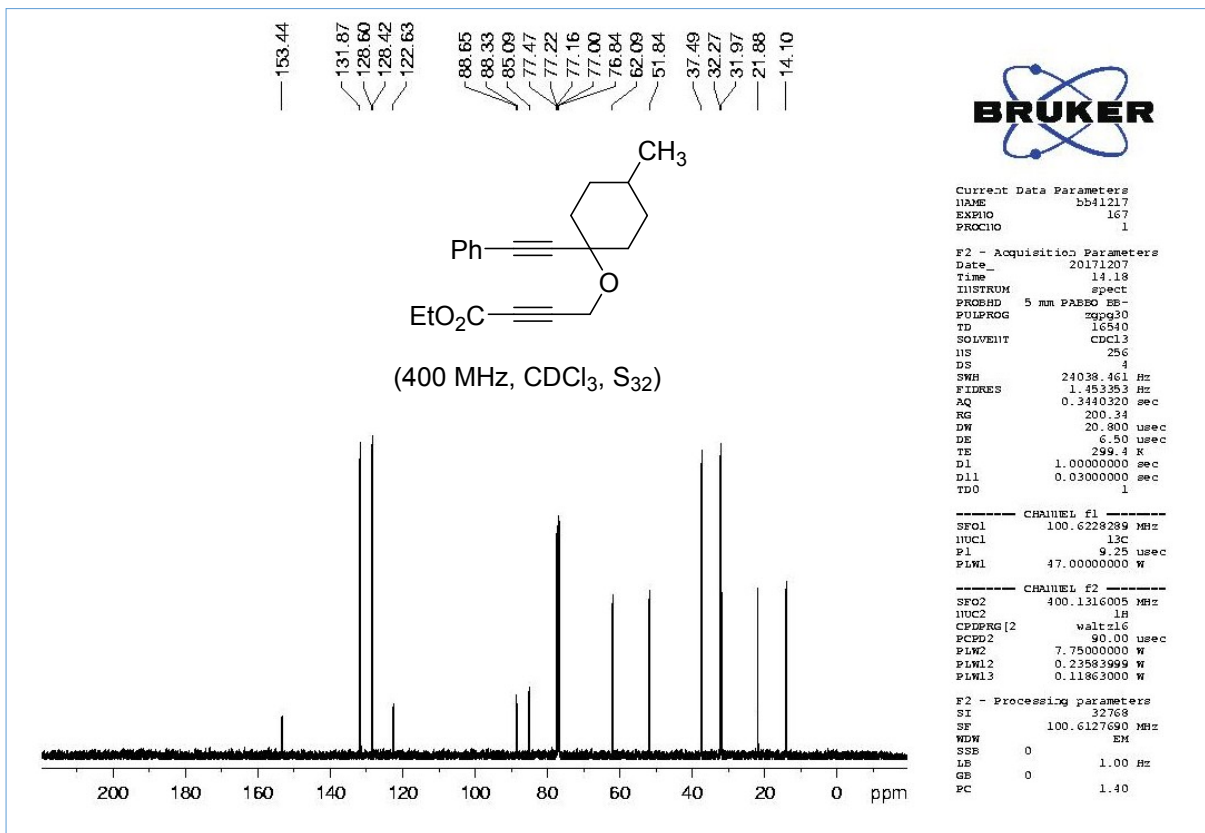

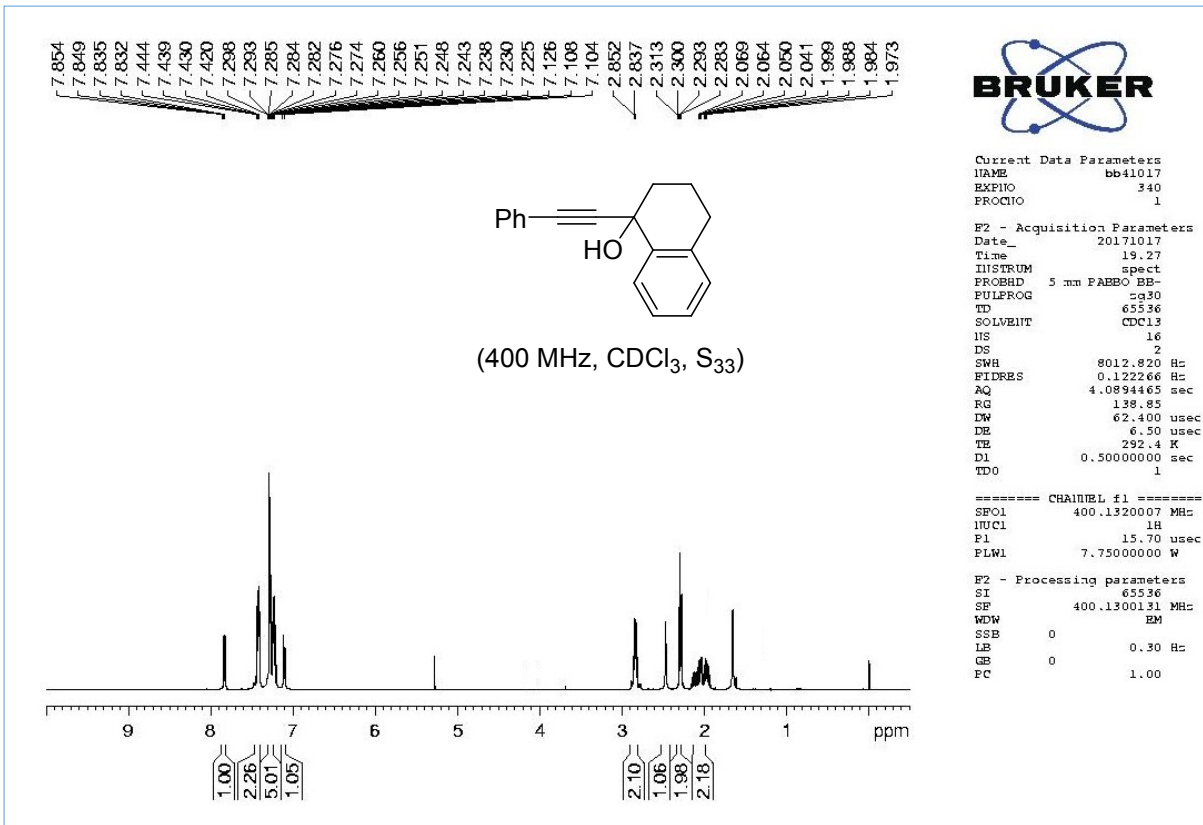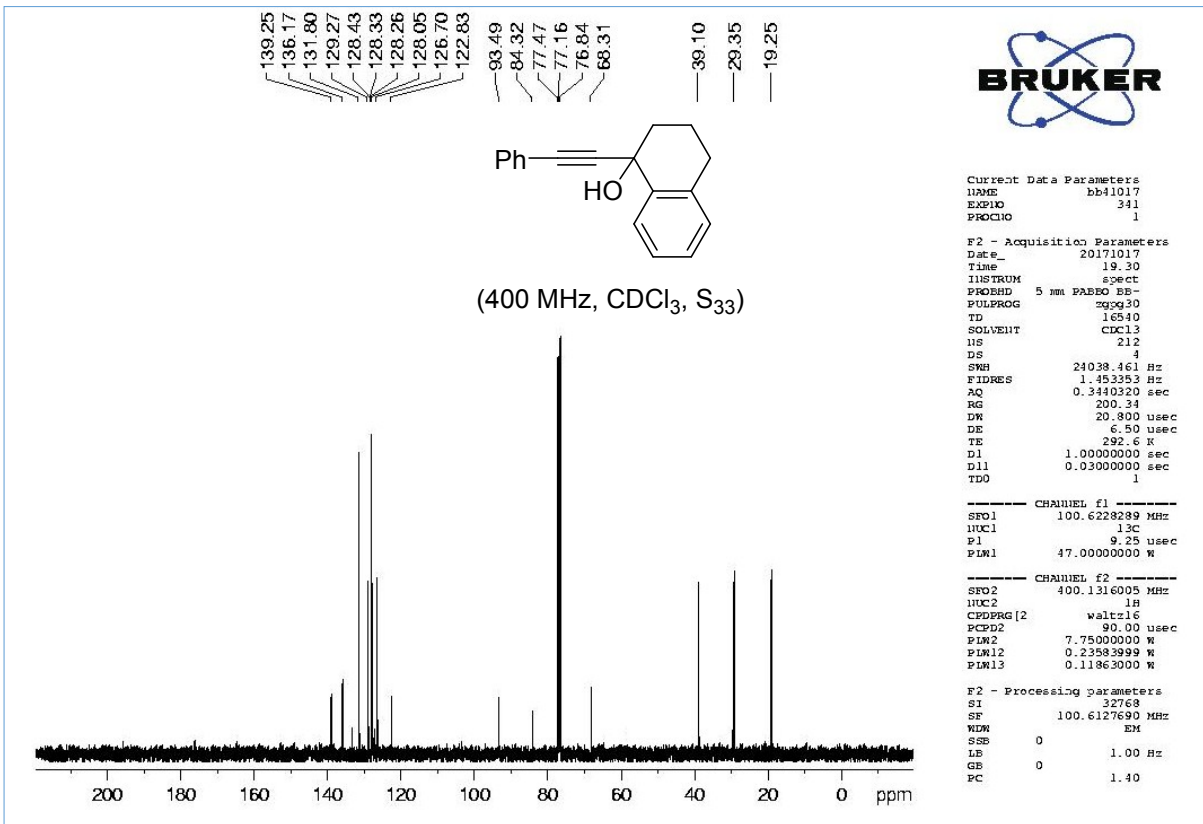

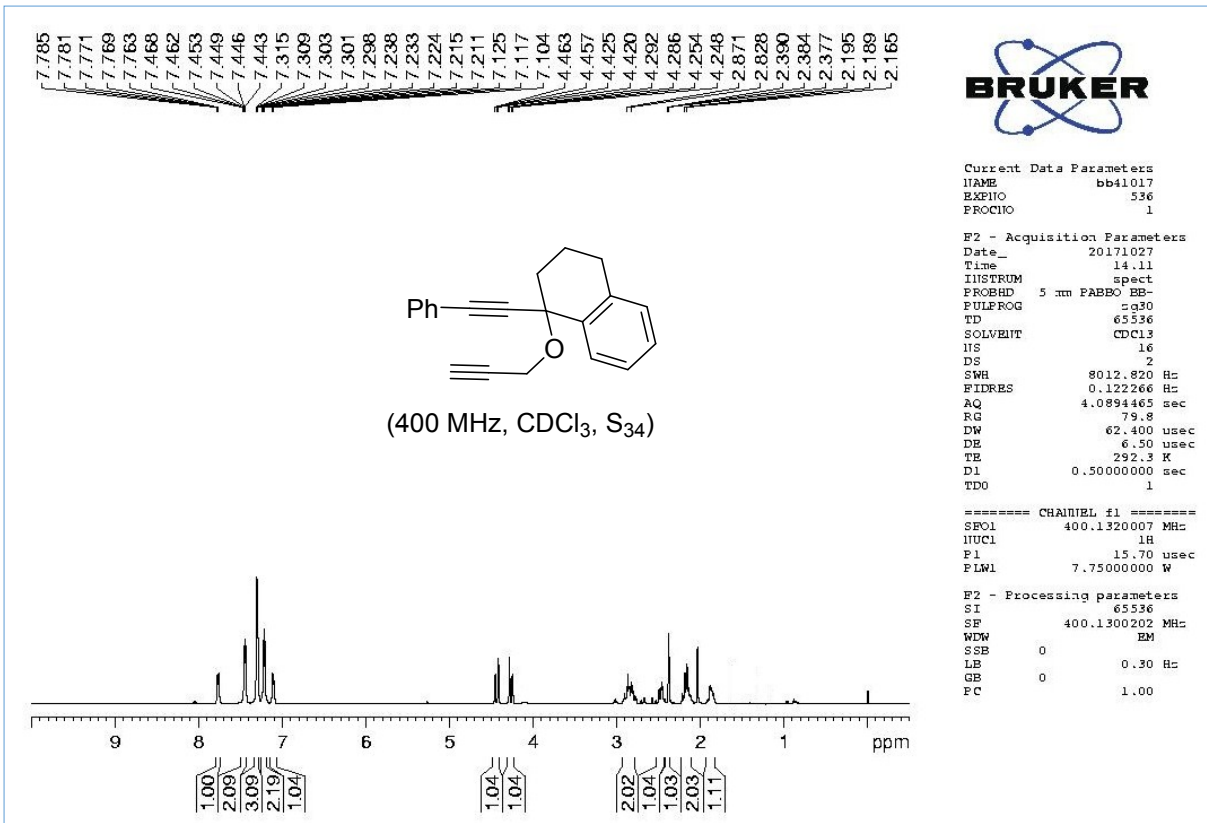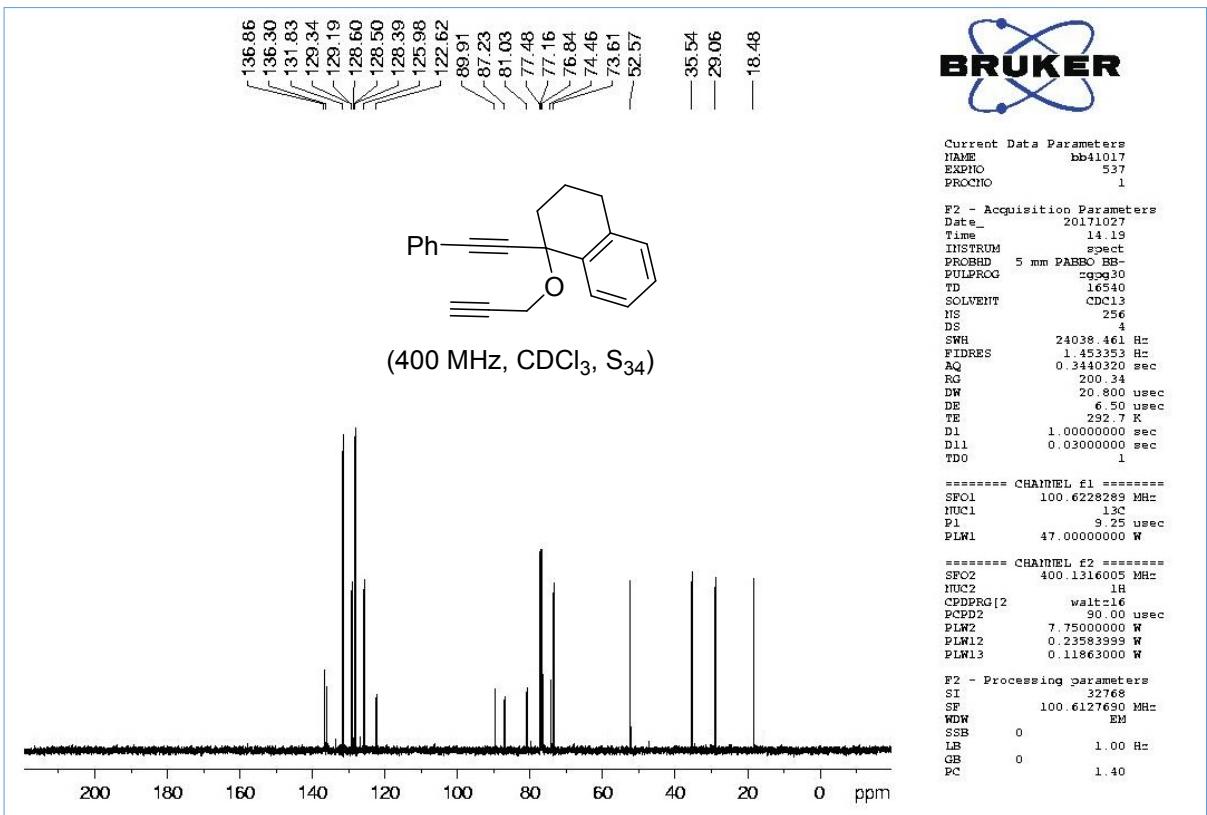

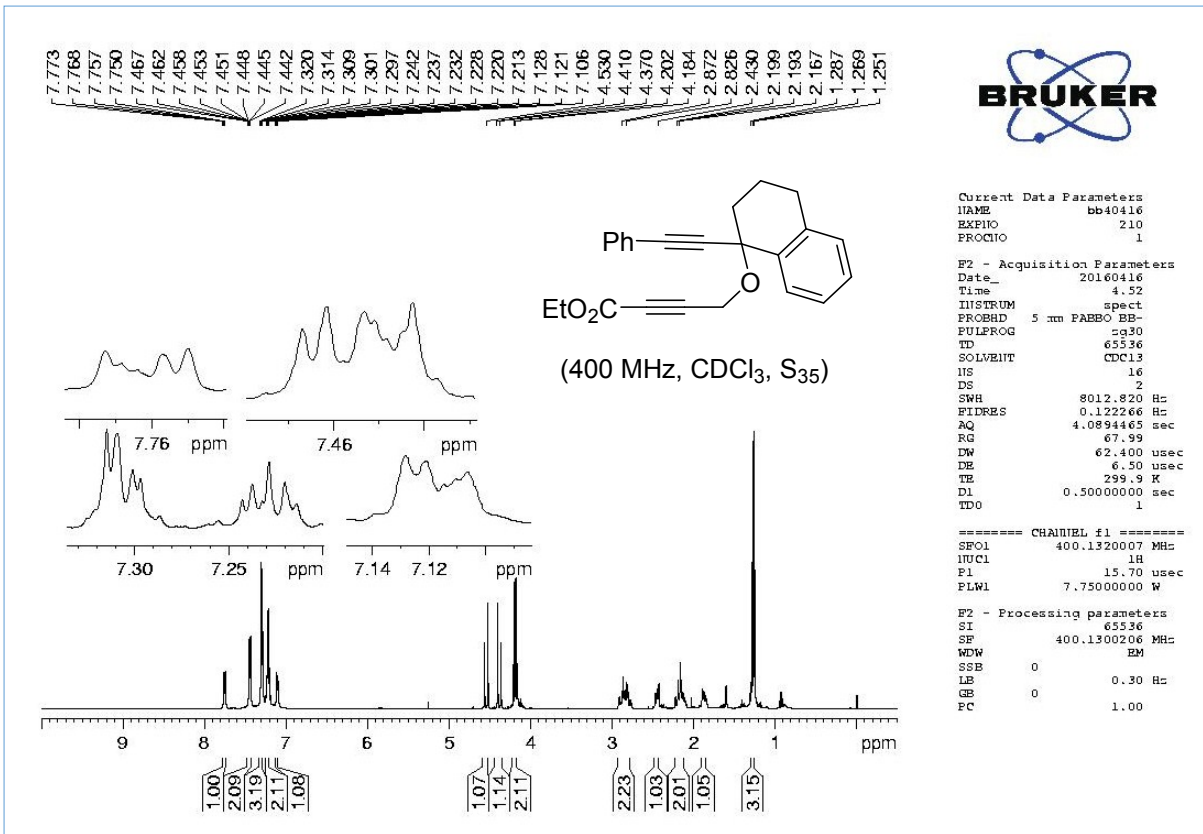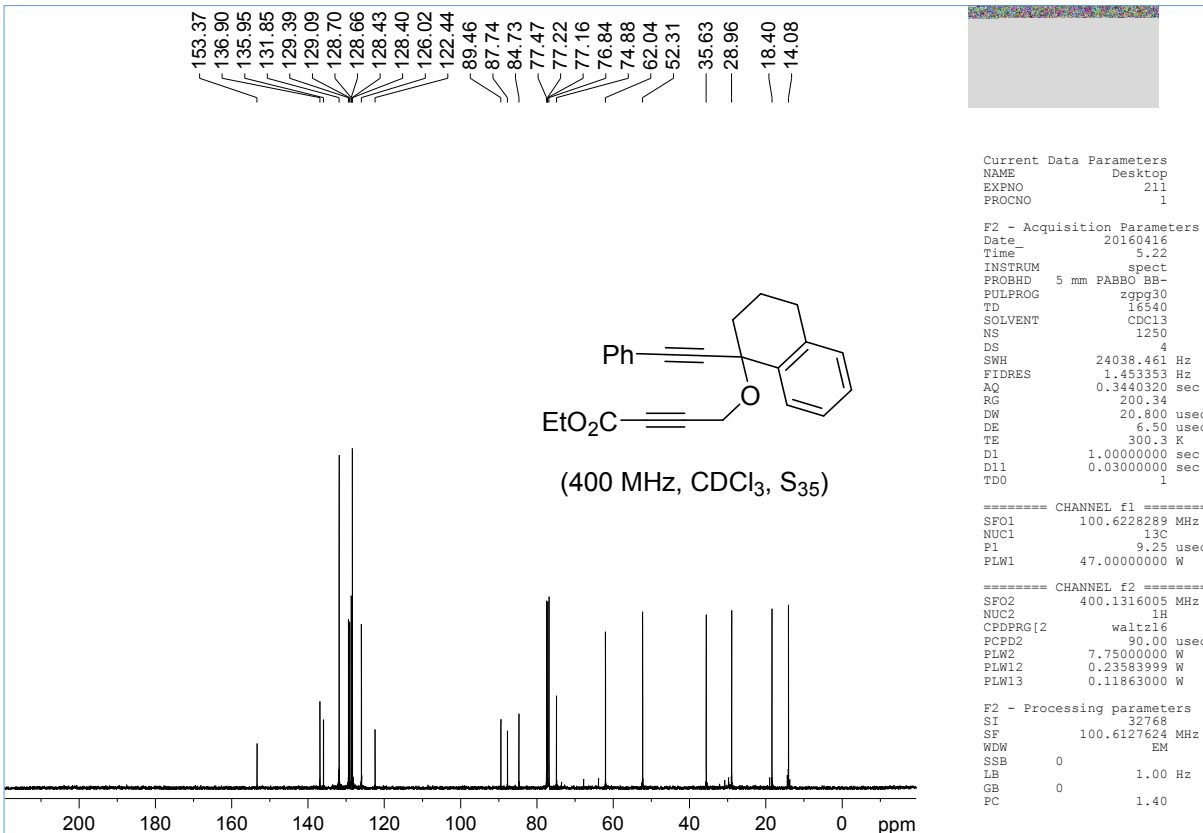

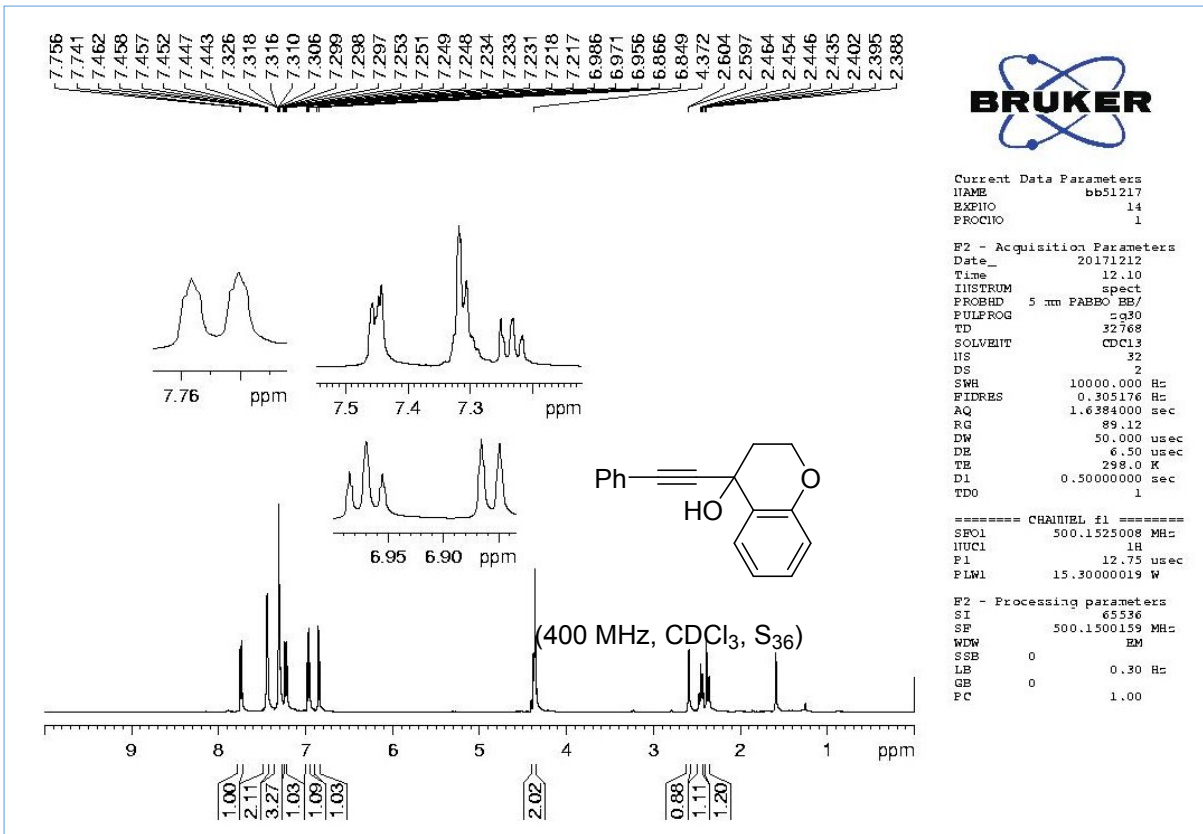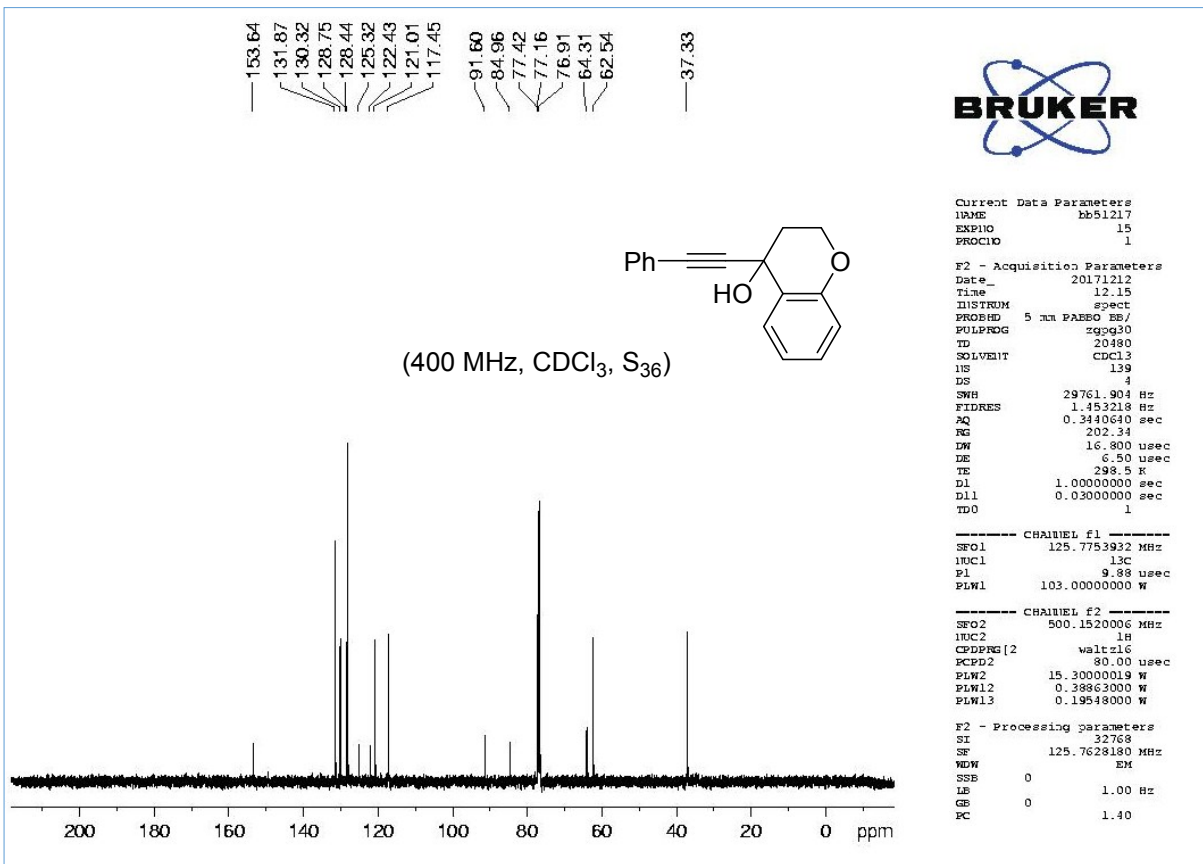

7.659  
7.656  
7.644  
7.641  
7.488  
7.484  
7.481  
7.479  
7.474  
7.469  
7.340  
7.338  
7.326  
7.251  
7.248  
6.947  
6.931  
6.871  
6.854  
4.527  
4.522  
4.497  
4.492  
4.488  
4.486  
4.337  
4.236  
4.231  
4.206  
4.201  
2.556  
2.553  
2.528  
2.428  
2.412  
2.404  
2.391  
2.386  
2.384  
2.381

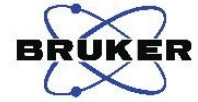

Current Data Parameters  
NAME bb51217  
EXPTO 33  
PROCNO 1

F2 - Acquisition Parameters  
Date\_ 20171213  
Time 15.11  
INSTRUM spect  
PROBHD 5 mm PABBO BB/  
PULPROG zg30  
TD 32768  
SOLVENT CDCl3  
NS 32  
DS 2  
SWH 10000.000 Hz  
FIDRES 0.305176 Hz  
AQ 1.6384000 sec  
RG 89.12  
DW 50.000 usec  
DE 6.50 usec  
TE 298.0 K  
D1 0.50000000 sec  
TDO 1

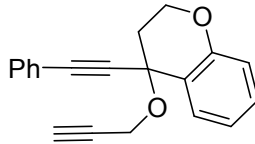

(400 MHz, CDCl<sub>3</sub>, S<sub>37</sub>)

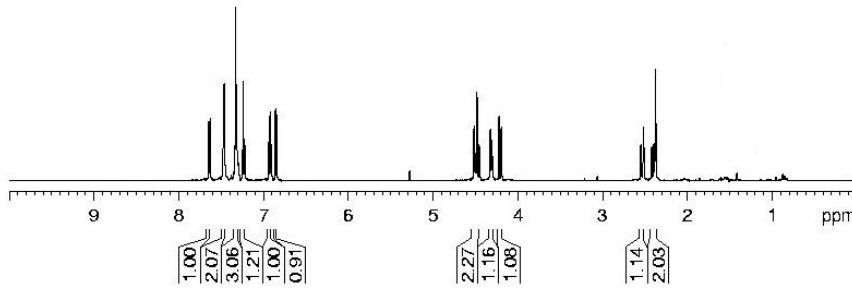

----- CHANNEL f1 -----  
SFO1 500.1525008 MHz  
NUC1 1H  
P1 12.75 usec  
PLW1 15.30000019 W

F2 - Processing parameters  
SI 65536  
SF 500.1500161 MHz  
WDW EM  
SSB 0  
LB 0.30 Hz  
GB 0  
PC 1.00

154.05  
131.94  
130.68  
129.86  
128.92  
128.50  
122.24  
121.31  
120.03  
117.54  
87.99  
87.62  
80.63  
77.42  
77.16  
76.91  
73.86  
70.13  
62.04  
52.60  
34.94

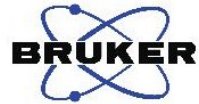

Current Data Parameters  
NAME bb51217  
EXPTO 34  
PROCNO 1

F2 - Acquisition Parameters  
Date\_ 20171213  
Time 15.19  
INSTRUM spect  
PROBHD 5 mm PABBO BB/  
PULPROG zgpg30  
TD 30480  
SOLVENT CDCl3  
NS 256  
DS 4  
SWH 29761.904 Hz  
FIDRES 1.453218 Hz  
AQ 0.3440640 sec  
RG 202.34  
DW 16.800 usec  
DE 6.50 usec  
TE 298.9 K  
D1 1.00000000 sec  
D11 0.03000000 sec  
TDO 1

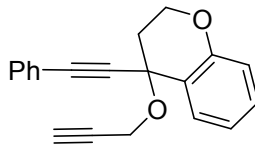

(400 MHz, CDCl<sub>3</sub>, S<sub>37</sub>)

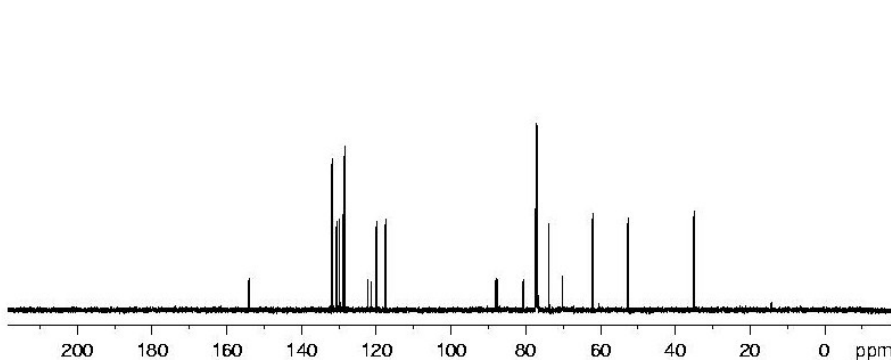

----- CHANNEL f1 -----  
SFO1 125.7753932 MHz  
NUC1 13C  
P1 9.88 usec  
PLW1 103.00000000 W

----- CHANNEL f2 -----  
SFO2 500.1520005 MHz  
NUC2 1H  
CPDPRG[2] waltz16  
PCPD2 80.00 usec  
PLW2 15.30000019 W  
PLW12 0.38863000 W  
PLW13 0.19548000 W

F2 - Processing parameters  
SI 32768  
SF 125.7628180 MHz  
WDW EM  
SSB 0  
LB 1.00 Hz  
GB 0  
PC 1.40



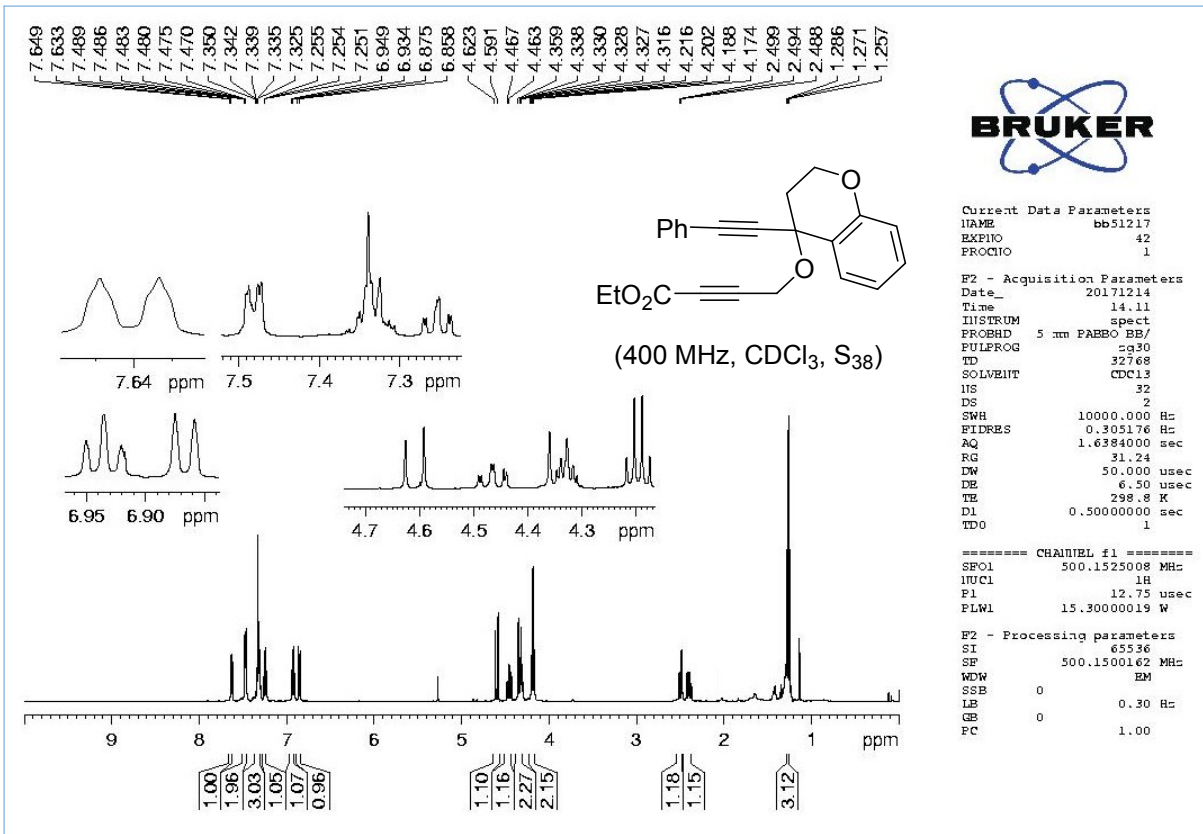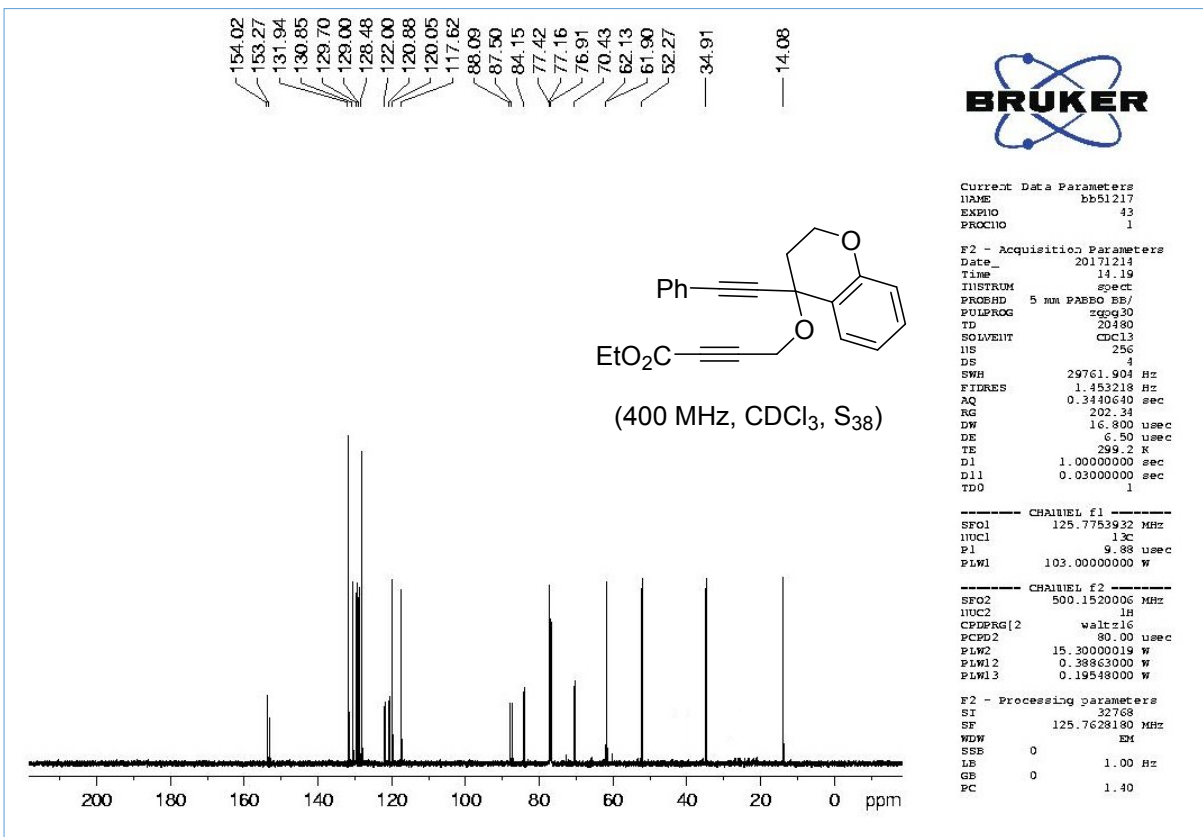

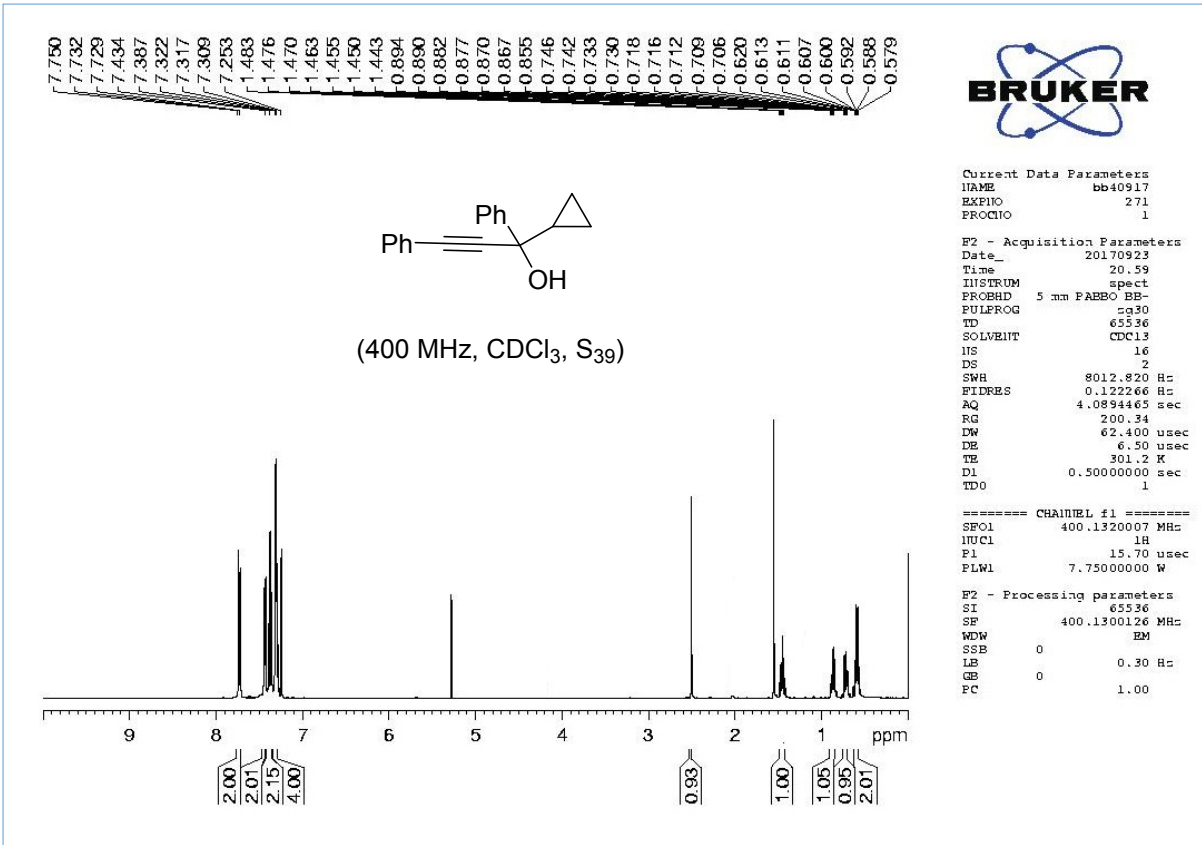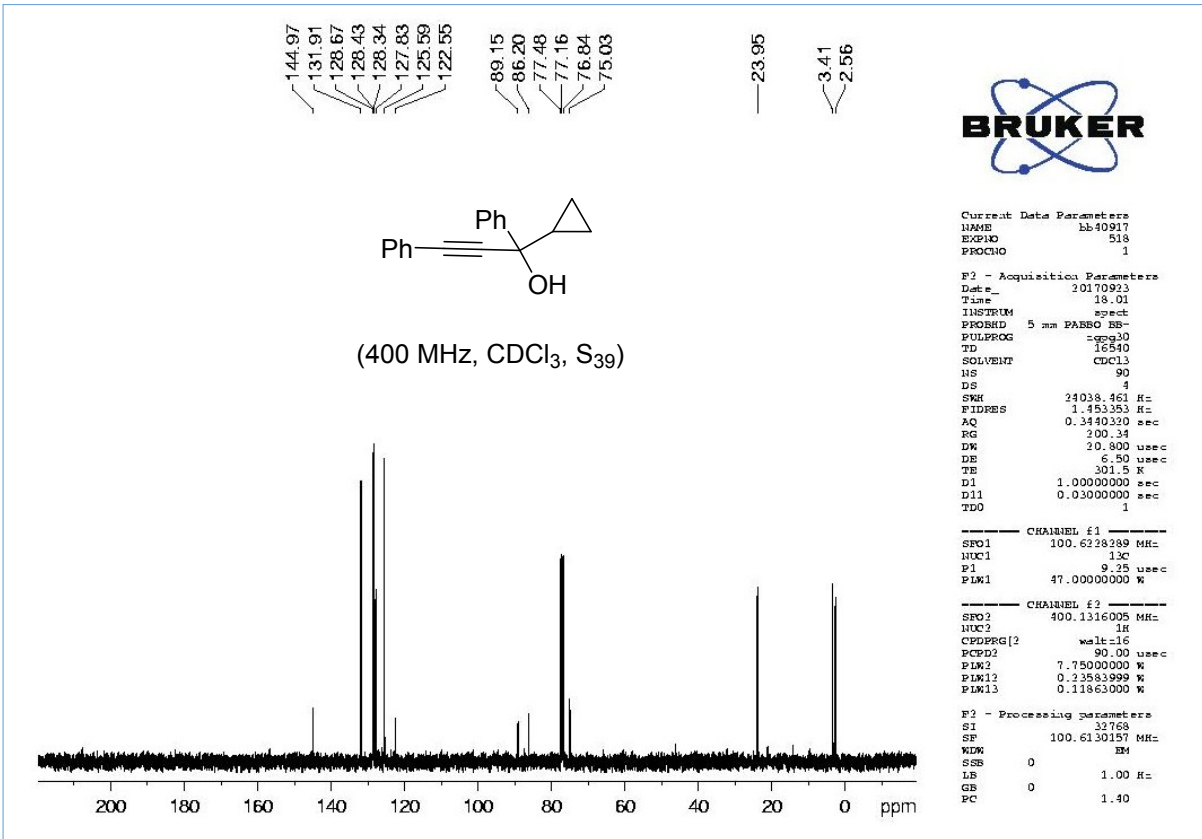

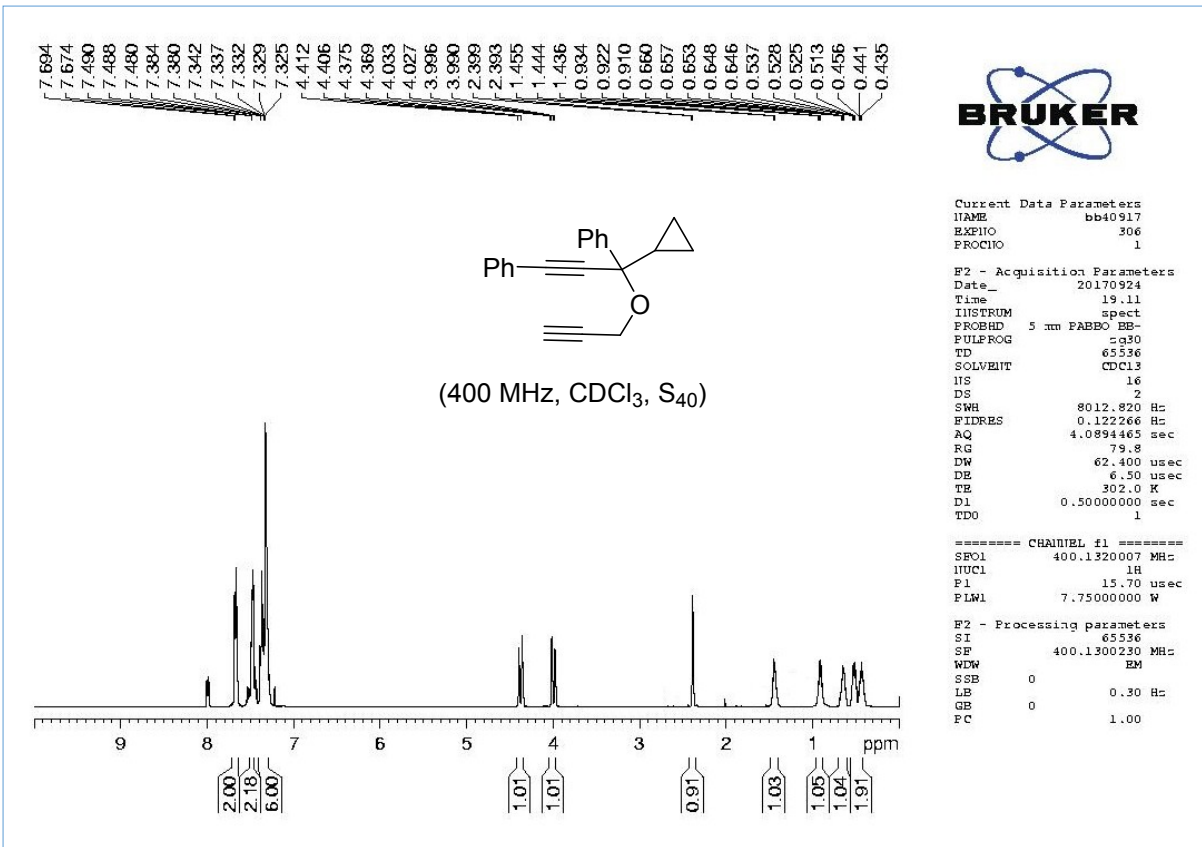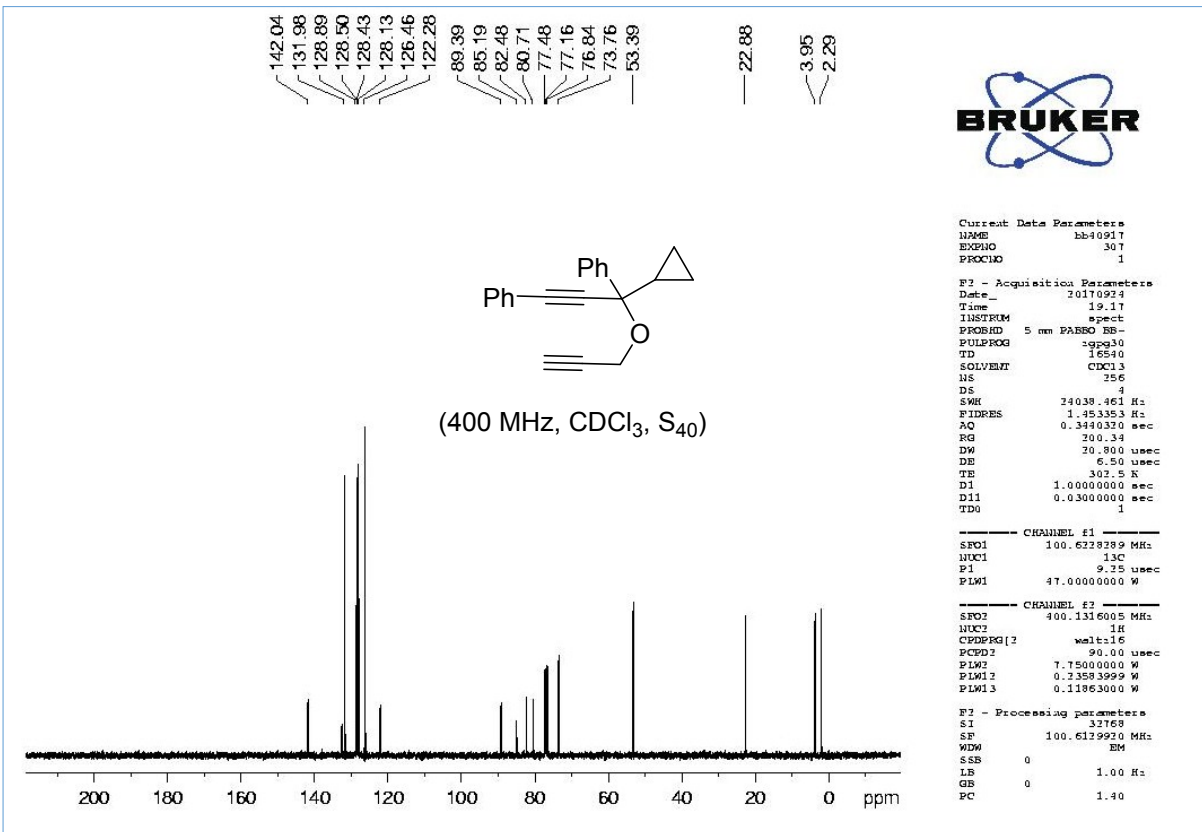

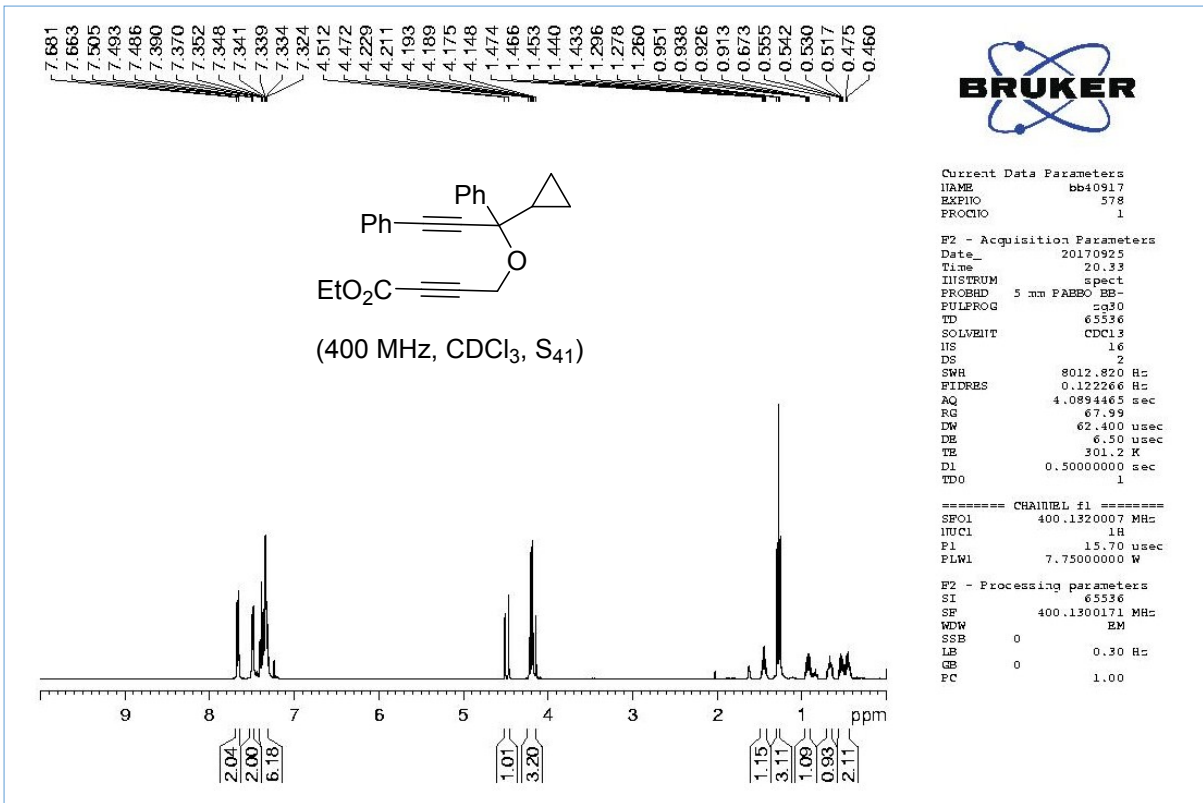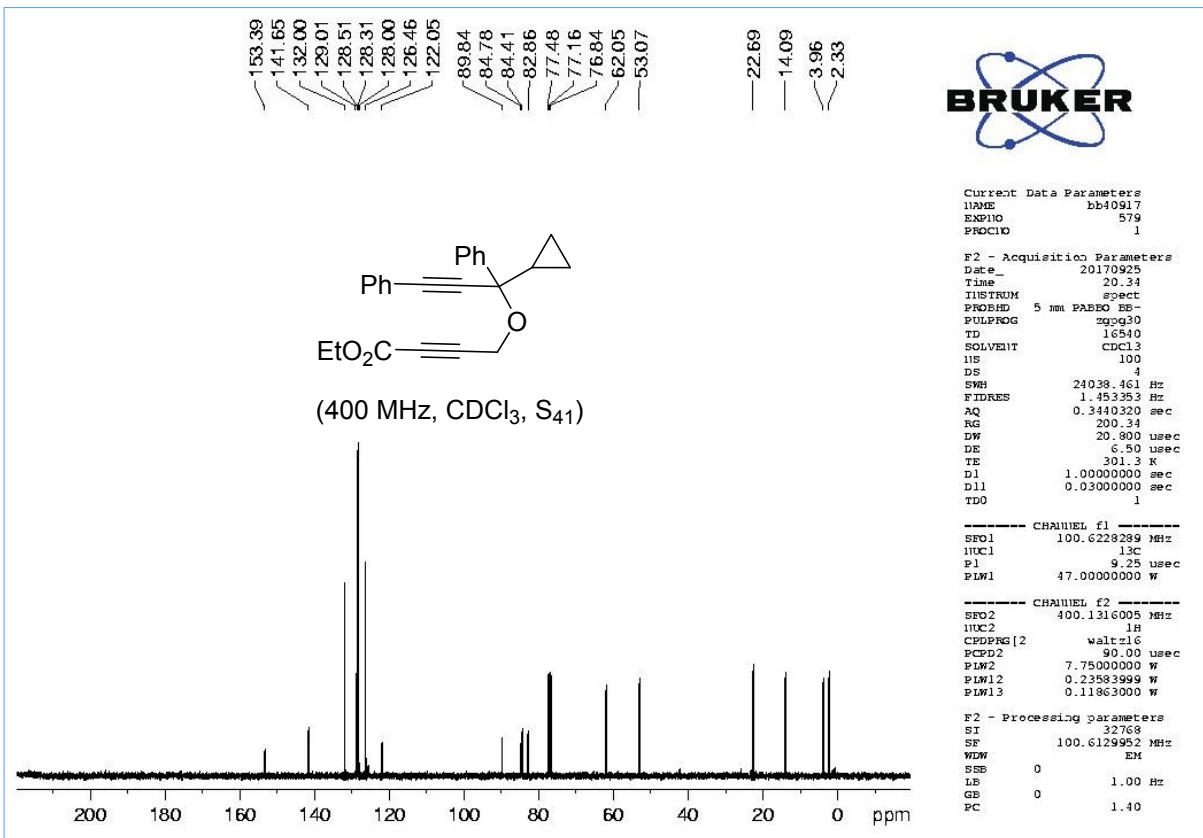

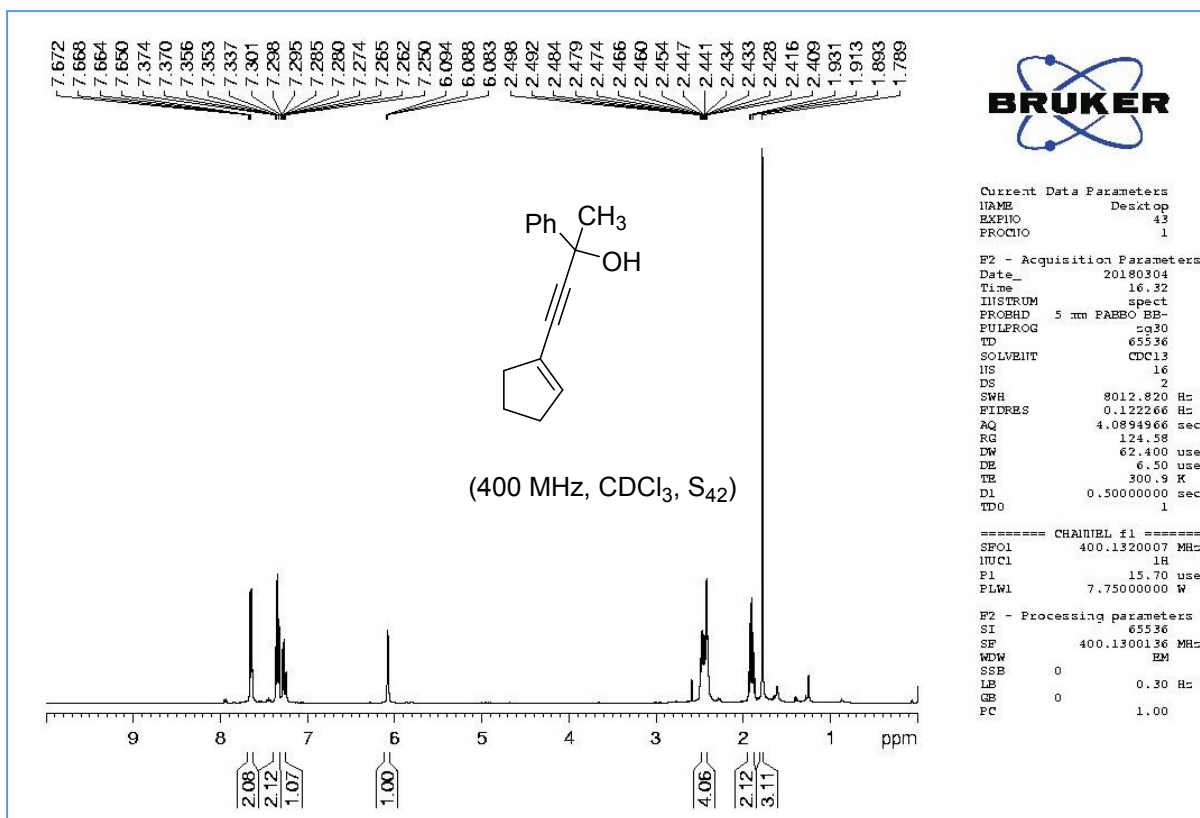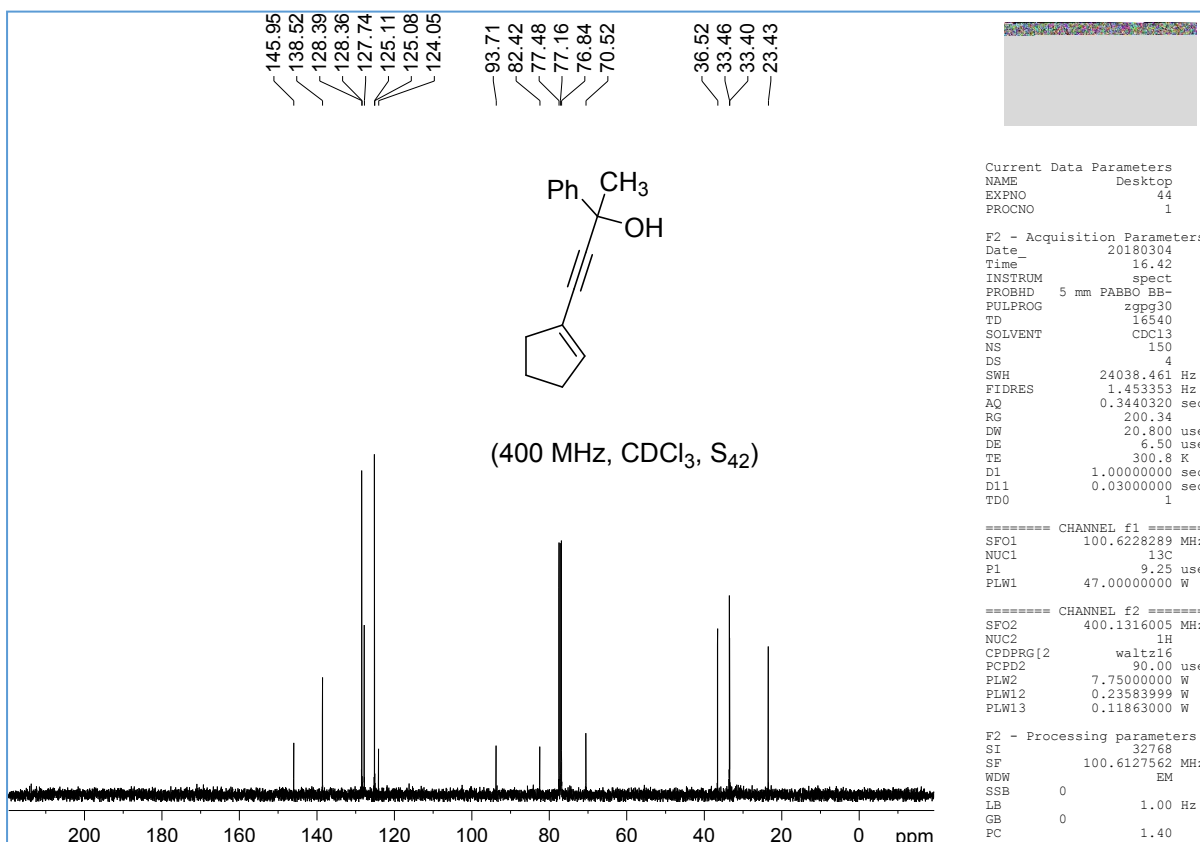



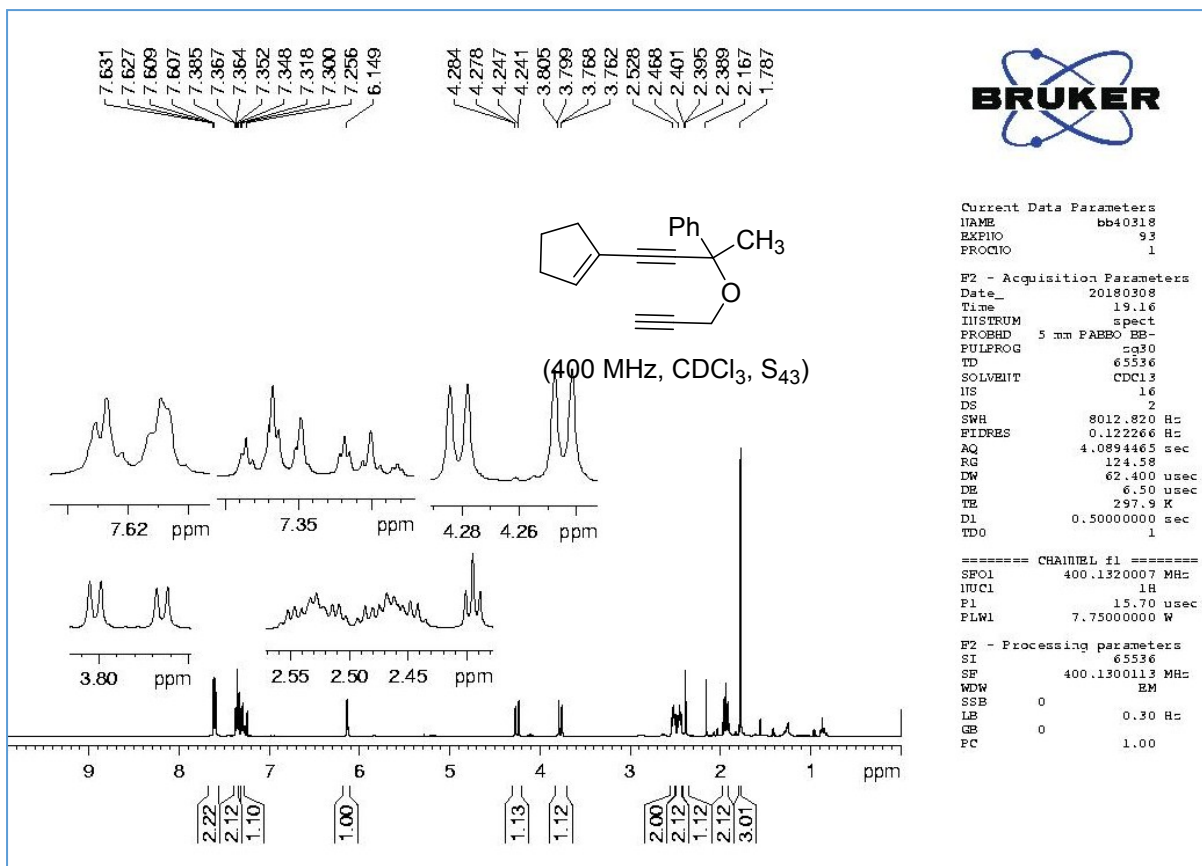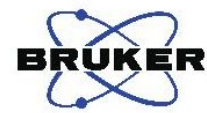

Current Data Parameters  
 NAME bb40318  
 EXPNO 93  
 PROCNO 1

F2 - Acquisition Parameters  
 Date\_ 20180308  
 Time 19.16  
 INSTRUM spect  
 PROBHD 5 mm FAPBO BB-  
 PULPROG zg30  
 TD 65536  
 SOLVENT CDCl3  
 NS 16  
 DS 2  
 SWH 8012.820 Hz  
 FIDRES 0.122266 Hz  
 AQ 4.0894465 sec  
 RG 124.58  
 DW 62.400 usec  
 DE 6.50 usec  
 TE 297.9 K  
 D1 0.50000000 sec  
 TD0 1

==== CHANNEL f1 =====  
 SFO1 400.1320007 MHz  
 NUCL1 1H  
 P1 15.70 usec  
 PLW1 7.75000000 W

F2 - Processing parameters  
 SI 65536  
 SF 400.1300113 MHz  
 WDW EM  
 SSB 0  
 LB 0.30 Hz  
 GB 0  
 PC 1.00

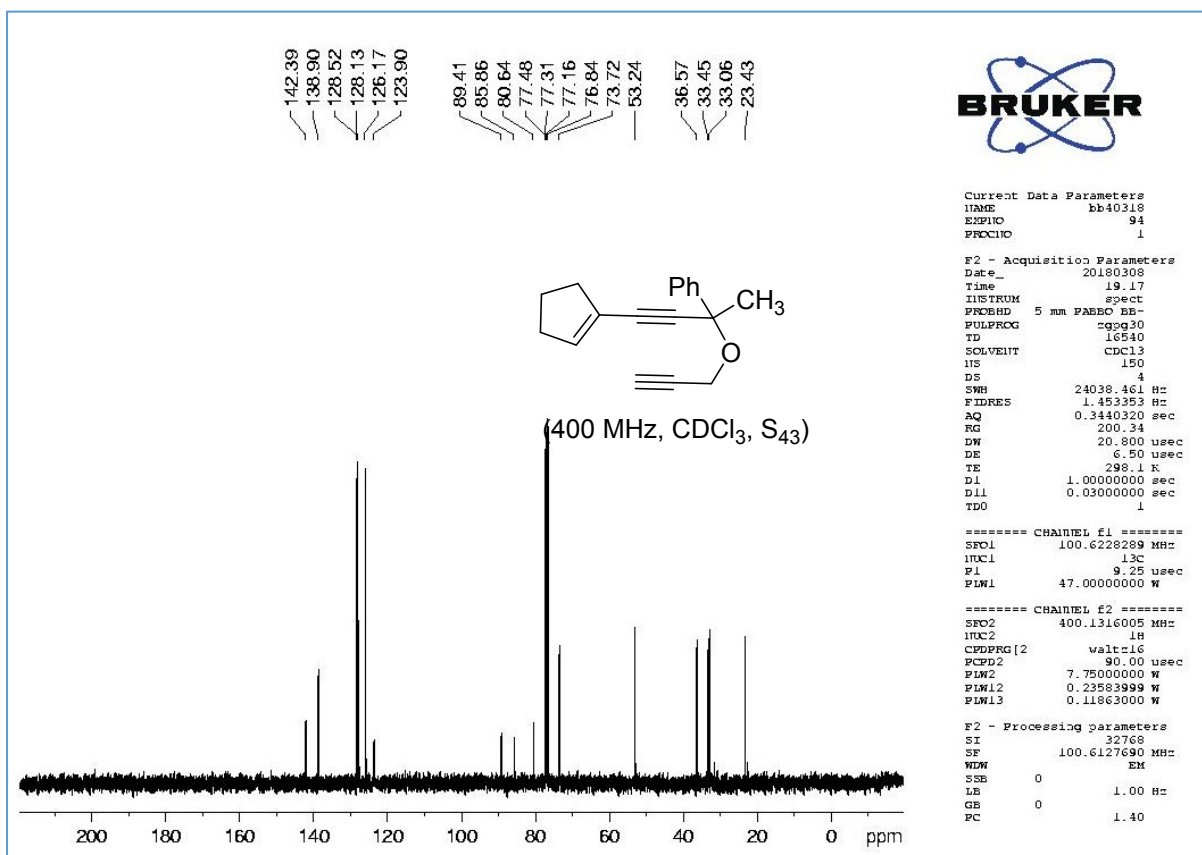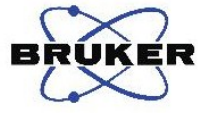

Current Data Parameters  
 NAME bb40318  
 EXPNO 94  
 PROCNO 1

F2 - Acquisition Parameters  
 Date\_ 20180308  
 Time 19.17  
 INSTRUM spect  
 PROBHD 5 mm FAPBO BB-  
 PULPROG zgpg30  
 TD 16640  
 SOLVENT CDCl3  
 NS 150  
 DS 4  
 SWH 24038.461 Hz  
 FIDRES 1.453353 Hz  
 AQ 0.3440320 sec  
 RG 200.34  
 DW 20.800 usec  
 DE 6.50 usec  
 TE 298.1 K  
 D1 1.00000000 sec  
 D11 0.03000000 sec  
 TD0 1

==== CHANNEL f1 =====  
 SFO1 100.6228289 MHz  
 NUCL1 13C  
 P1 9.25 usec  
 PLW1 47.00000000 W

==== CHANNEL f2 =====  
 SFO2 400.1316005 MHz  
 NUCL2 1H  
 CPDPRG2 waltz16  
 PCPD2 90.00 usec  
 PLW2 7.75000000 W  
 PLW12 0.23583999 W  
 PLW13 0.11863000 W

F2 - Processing parameters  
 SI 32768  
 SF 100.6127690 MHz  
 WDW EM  
 SSB 0  
 LB 1.00 Hz  
 GB 0  
 PC 1.40



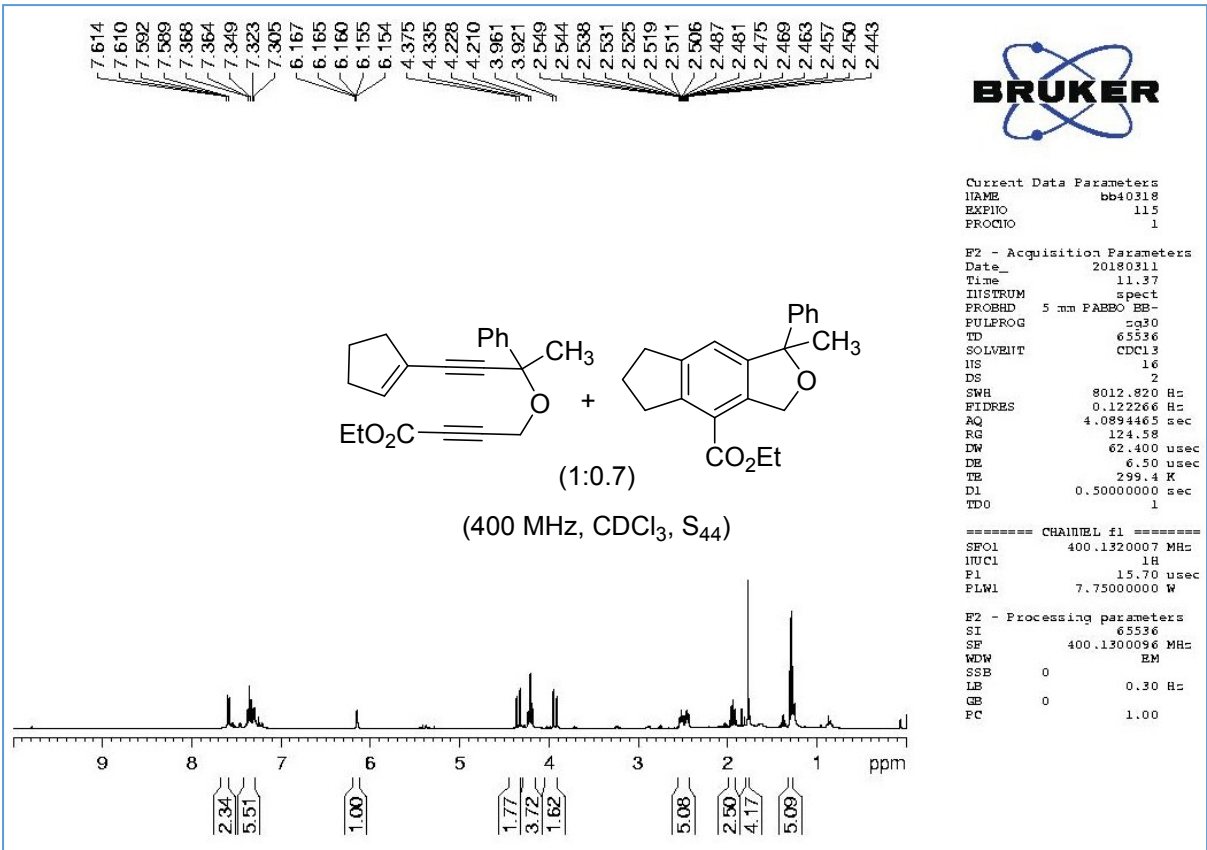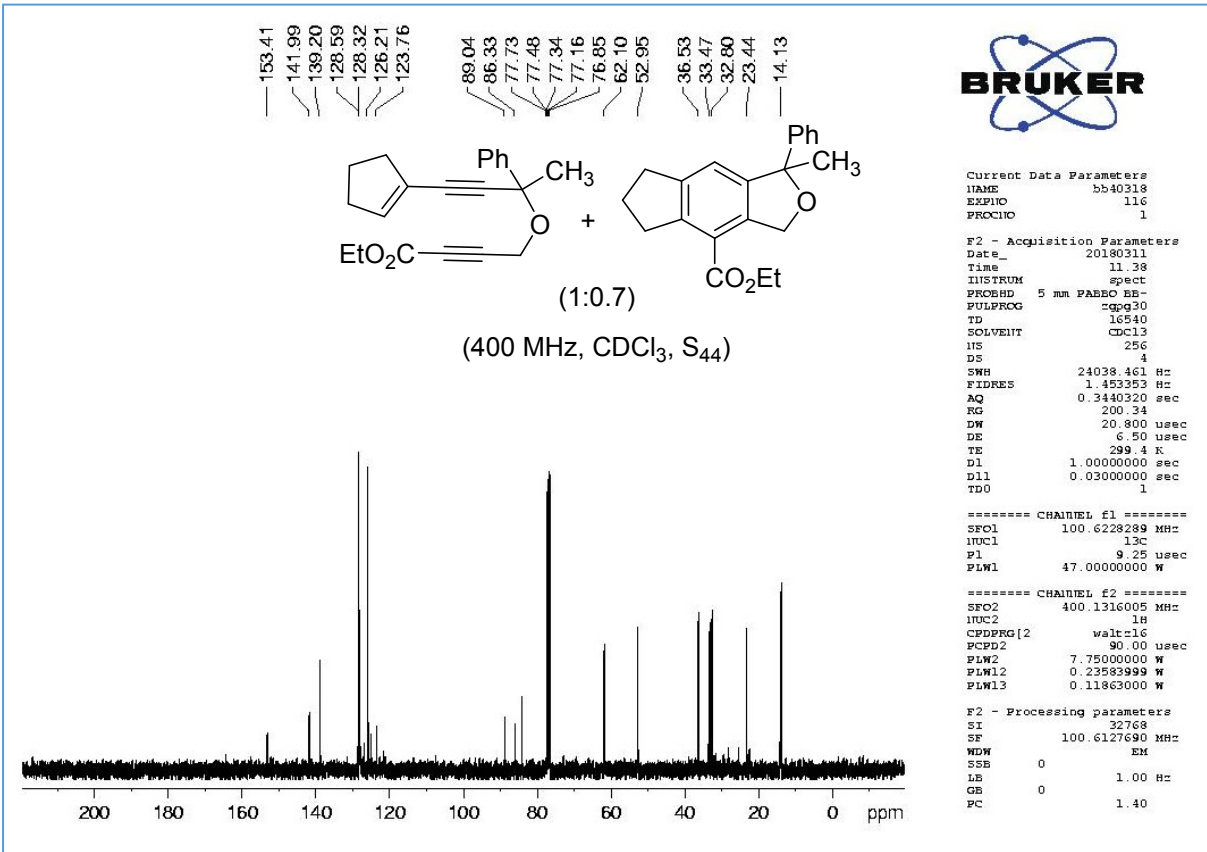

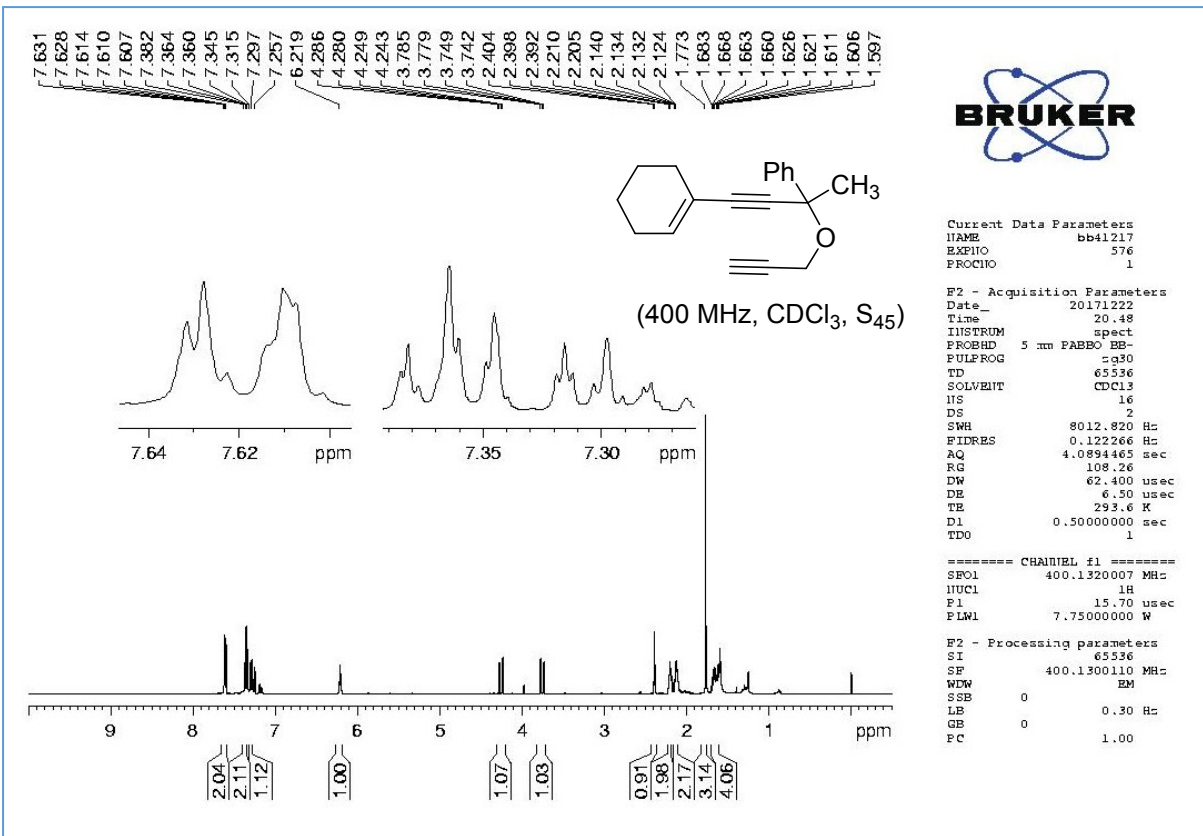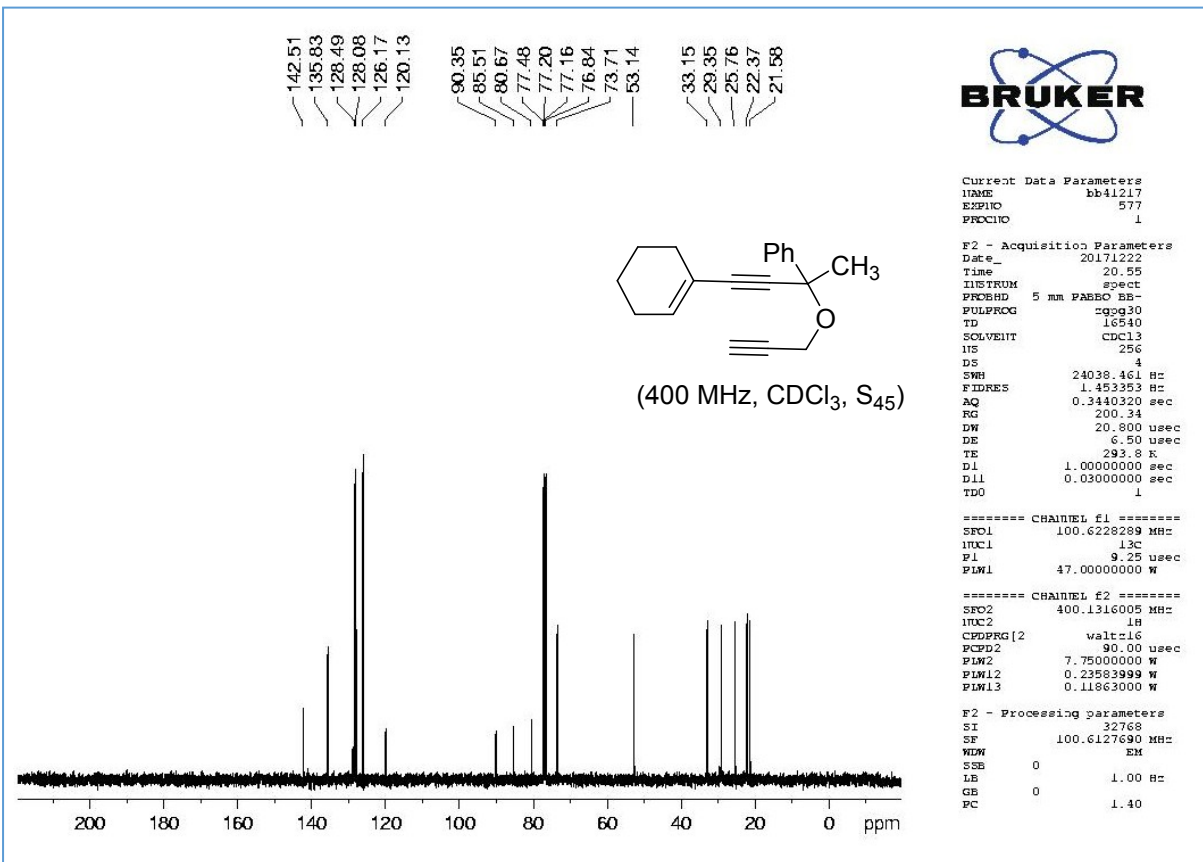

7.479  
7.476  
7.458  
7.456  
7.365  
7.346  
7.337  
7.319  
7.316  
7.303  
7.299  
7.259  
7.061  
5.295  
5.283  
5.263  
4.348  
4.343  
4.339  
4.330  
4.326  
4.228  
4.211  
3.941  
3.901  
2.813  
2.205  
2.200  
2.141  
2.135  
2.132  
2.125  
2.120  
1.839  
1.768  
1.391  
1.373  
1.355  
1.297  
1.279

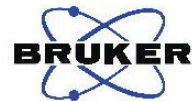

Current Data Parameters  
NAME bb41217  
EXPHO 912  
PROCNO 1

F2 - Acquisition Parameters  
Date\_ 20171230  
Time 9.37  
INSTRUM spect  
PROBHD 5 mm PABBO BB-  
PULPROG zg30  
TD 65536  
SOLVENT CDCl3  
HS 16  
DS 2  
SWH 8012.820 Hz  
FIDRES 0.122266 Hz  
AQ 4.0894465 sec  
RG 124.58  
DW 62.400 usec  
DE 6.50 usec  
TE 293.6 K  
D1 0.5000000 sec  
TDO 1

===== CHANNEL f1 =====  
SFO1 400.1320007 MHz  
NUC1 1H  
P1 15.70 usec  
PLW1 7.75000000 W

F2 - Processing parameters  
SI 65536  
SF 400.1300104 MHz  
WDW EM  
SSB 0  
LB 0.30 Hz  
GB 0  
PC 1.00

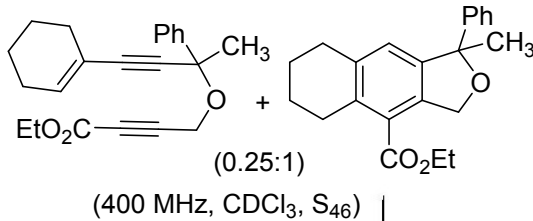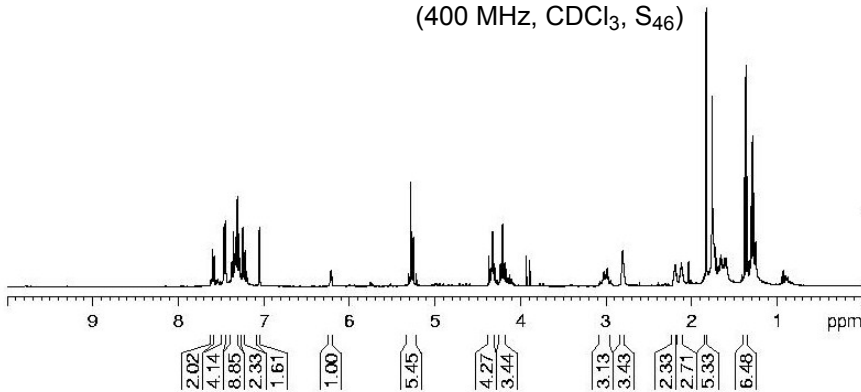

167.49  
145.95  
144.01  
138.19  
138.10  
137.84  
136.11  
128.56  
128.40  
127.20  
126.21  
125.82  
125.25  
88.20  
77.48  
77.16  
76.84  
72.64  
62.12  
60.92  
53.57  
52.86  
30.64  
28.50  
27.97  
23.26  
22.54  
14.46

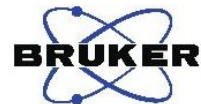

Current Data Parameters  
NAME bb41217  
EXPHO 926  
PROCNO 1

F2 - Acquisition Parameters  
Date\_ 20171230  
Time 13.45  
INSTRUM spect  
PROBHD 5 mm PABBO BB-  
PULPROG zgpg30  
TD 16540  
SOLVENT CDCl3  
HS 750  
DS 4  
SWH 24038.461 Hz  
FIDRES 1.453353 Hz  
AQ 0.3440320 sec  
RG 200.34  
DW 20.800 usec  
DE 6.50 usec  
TE 293.9 K  
D1 1.0000000 sec  
D11 0.0300000 sec  
TDO 1

===== CHANNEL f1 =====  
SFO1 100.6228299 MHz  
NUC1 13C  
P1 9.25 usec  
PLW1 47.00000000 W

===== CHANNEL f2 =====  
SFO2 400.1316005 MHz  
NUC2 1H  
CPDPRG[2] waltz16  
PCPD2 90.00 usec  
PLW2 7.75000000 W  
PLW12 0.23583999 W  
PLW13 0.11863000 W

F2 - Processing parameters  
SI 32768  
SF 100.6127690 MHz  
WDW EM  
SSB 0  
LB 1.00 Hz  
GB 0  
PC 1.40

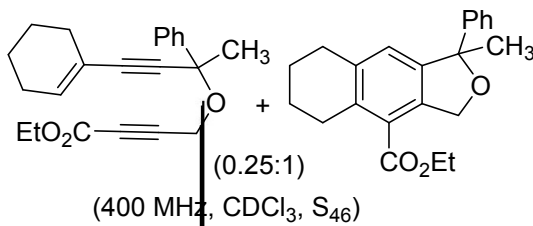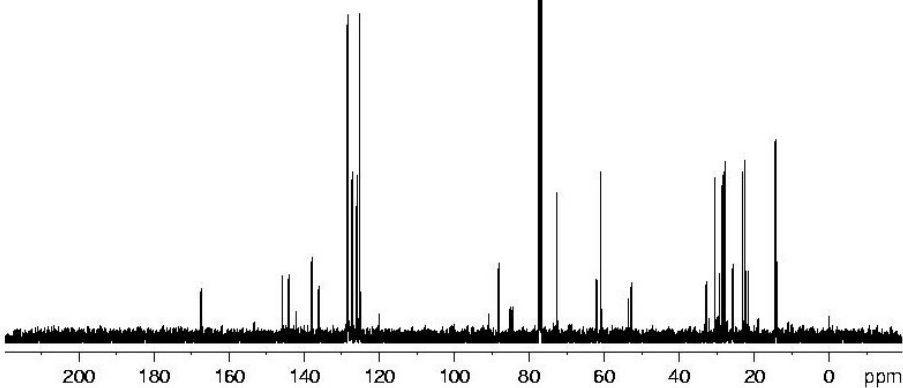

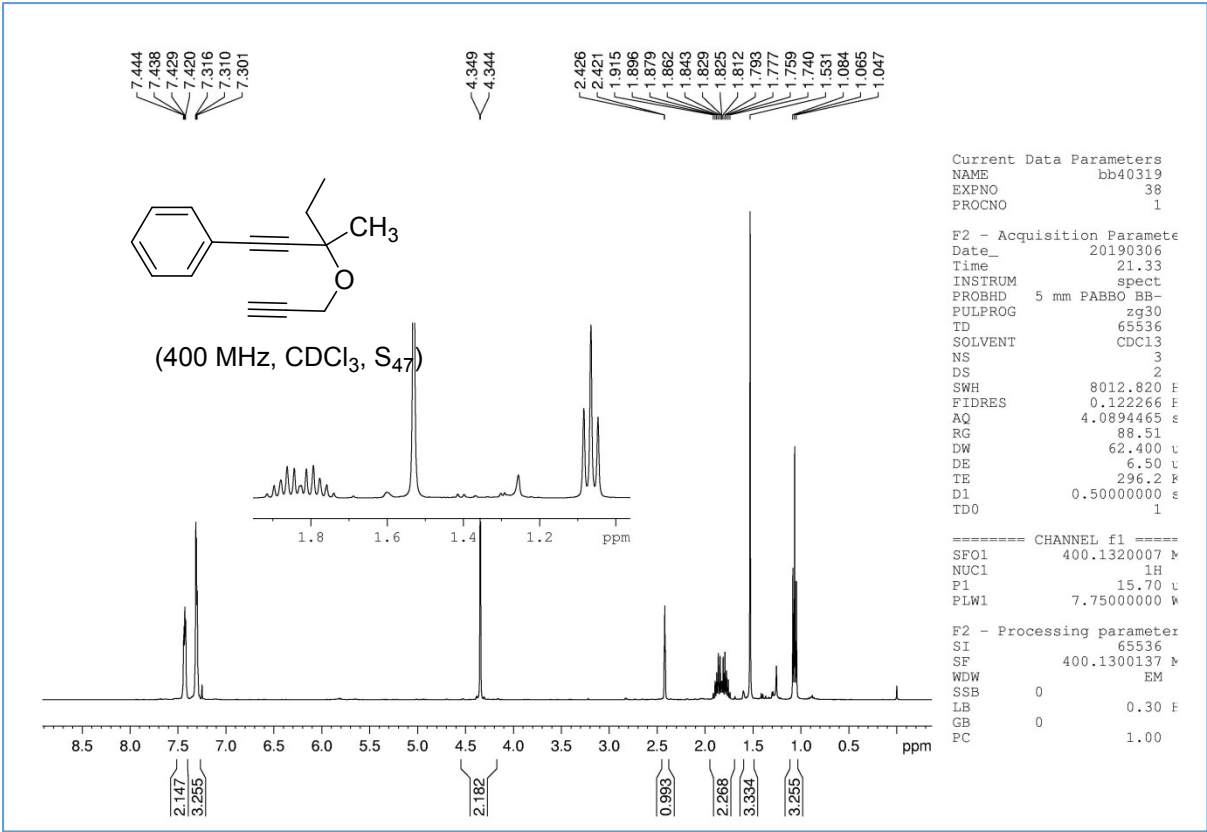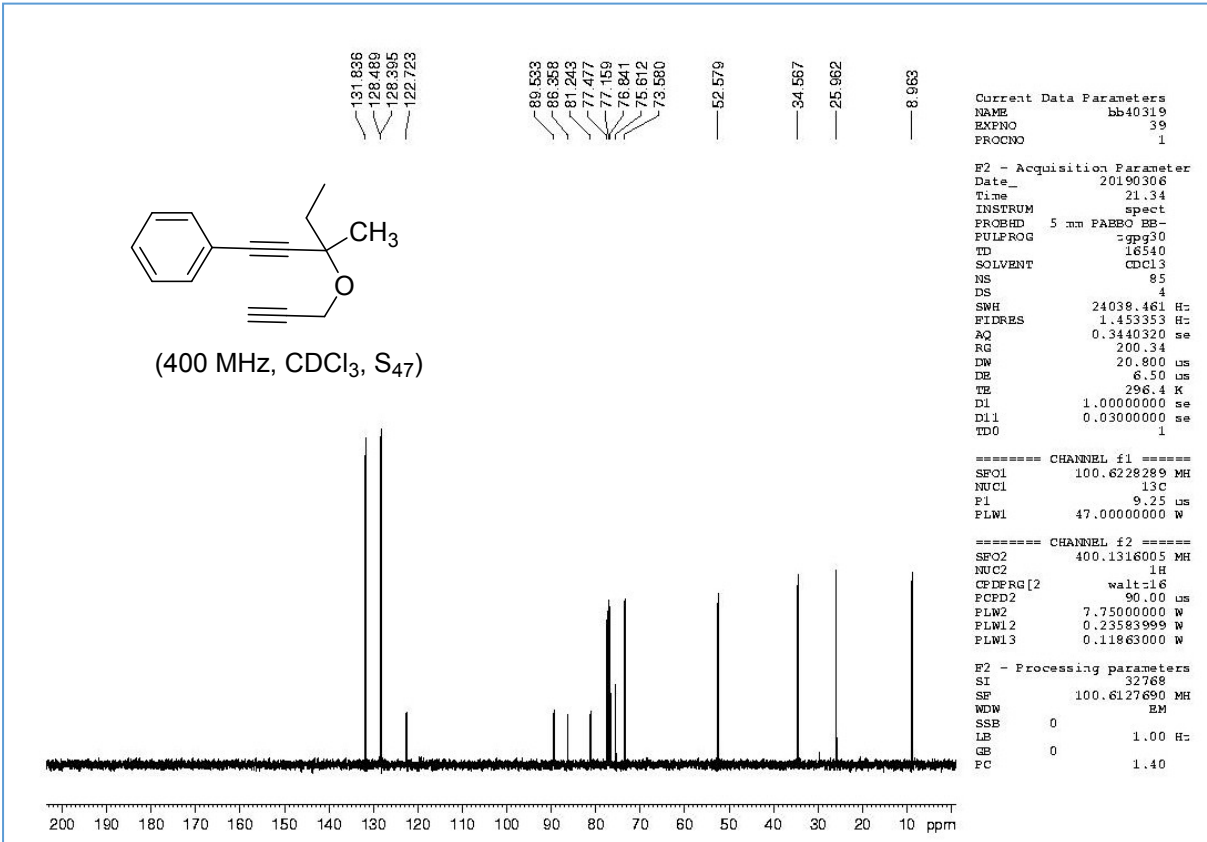

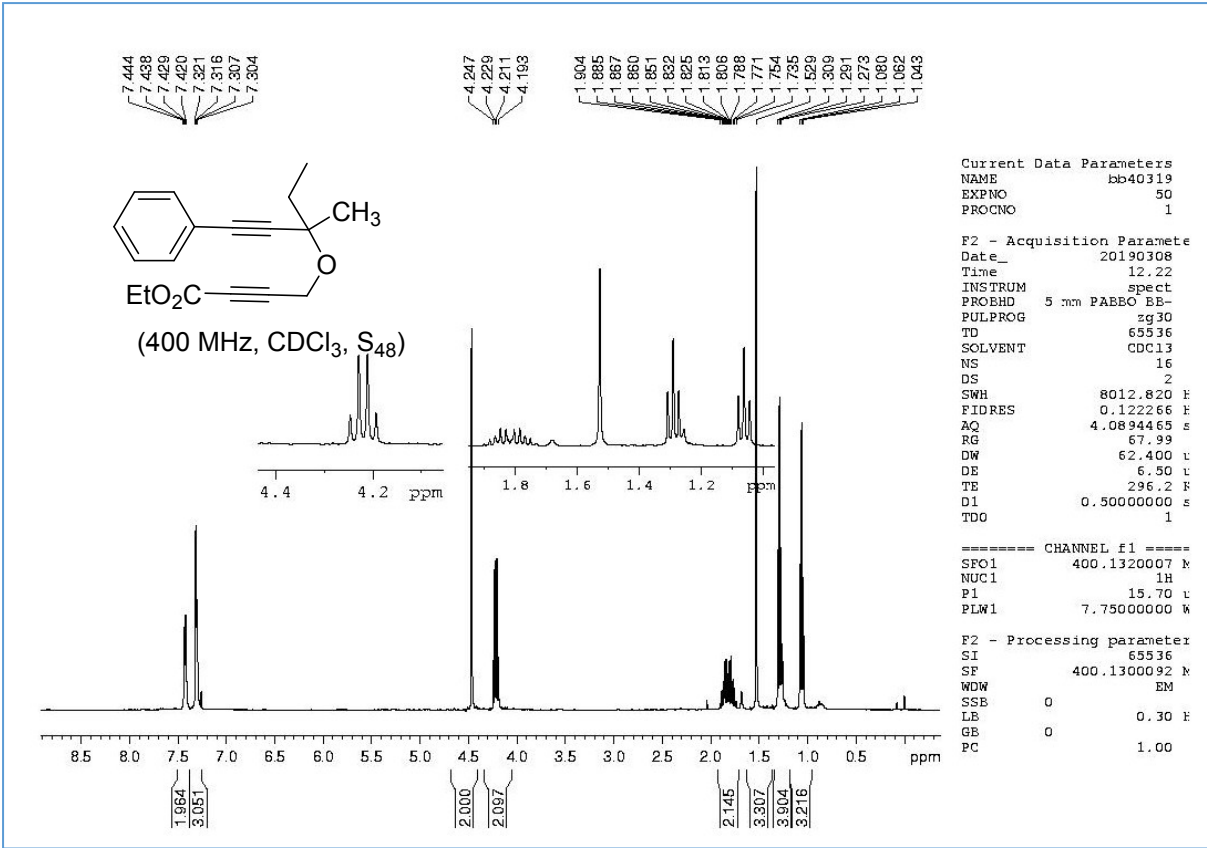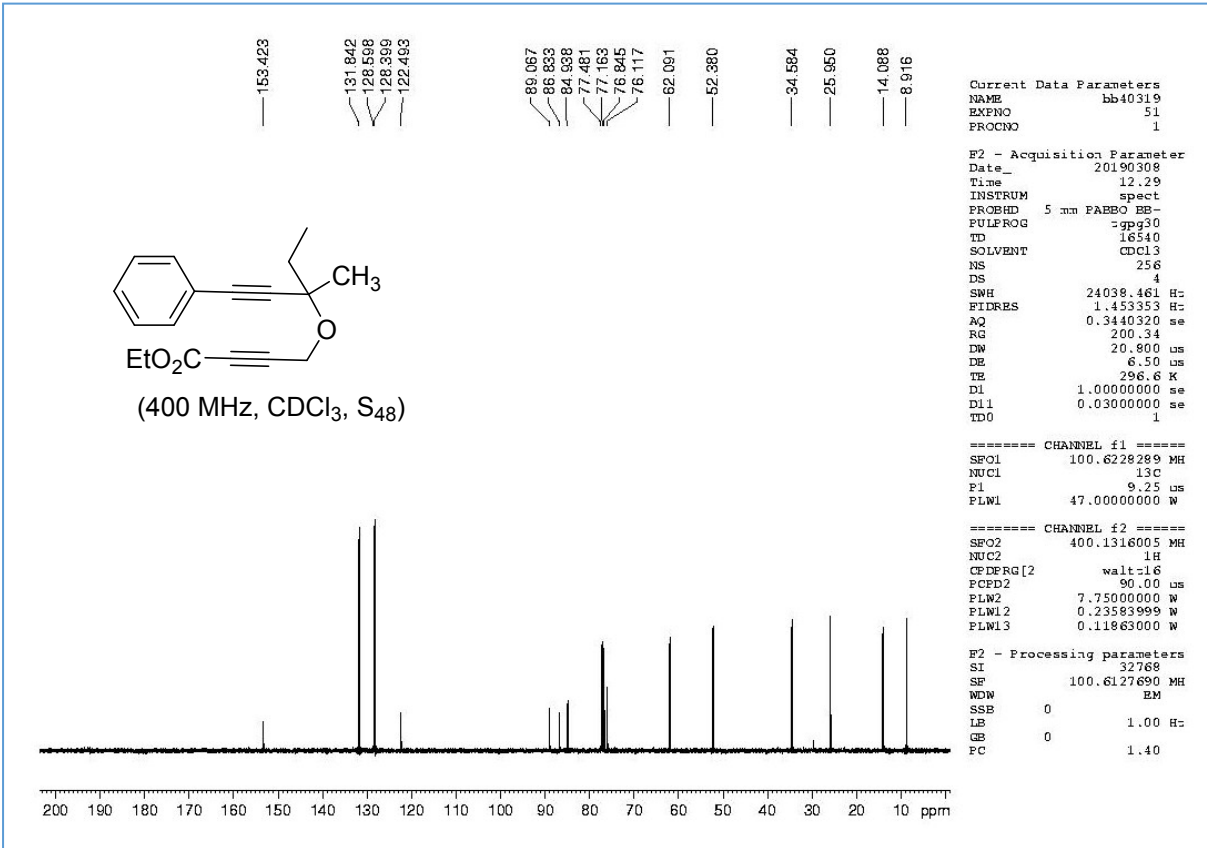

Supplement: c9ob00708c2.pdf [file c9ob00708c2.pdf]
